# Supplementary material for: Sumoylation at chromatin governs coordinated repression of a transcriptional program essential for cell growth and proliferation
Source: HighWire-hosted journal article supplement (doi:10.1101/gr.154872.113), 2013-07-26
Supplement: Supplemental_Table5.xlsx [file Supplemental_Table5.xlsx]

## Sheet: Feuil1
probesetID	Average Control	Average PIASY	Gene name		Fold change	Bonferroni-FDR.KO-Py
7934906	11.0916	9.68236	ACTA2	actin, alpha 2, smooth muscle, aorta	0.376501	0
8096116	6.15215	7.51196	AGPAT9	1-acylglycerol-3-phosphate O-acyltransferase 9	2.56651	2.07391e-09
8122807	7.83109	8.75091	AKAP12	A kinase (PRKA) anchor protein (gravin) 12	1.89188	3.02224e-05
8143054	10.9021	11.5359	AKR1B1	aldo-keto reductase family 1, member B1 (aldose reductase)	1.55161	9.32573e-08
7931832	5.4964	7.25414	AKR1C2	aldo-keto reductase family 1, member C2 (dihydrodiol dehydrogenase 2; bile acid binding protein; 3-alpha hydroxysteroid dehydrogenase, type III)	3.38168	2.01503e-12
8081431	10.7319	10.2075	ALCAM	activated leukocyte cell adhesion molecule	0.695283	0.00553053
8155327	8.25755	7.48305	ALDH1B1	aldehyde dehydrogenase 1 family, member B1	0.58459	0.0102807
8005638	6.27799	7.20951	ALDH3A2	aldehyde dehydrogenase 3 family, member A2	1.90729	0.0438527
8132318	8.53312	7.59636	ANLN	anillin, actin binding protein	0.522403	0.000732973
7945182	10.2449	10.8527	APLP2	amyloid beta (A4) precursor-like protein 2	1.52395	3.84337e-05
8073062	6.84494	5.86362	APOBEC3B	apolipoprotein B mRNA editing enzyme, catalytic polypeptide-like 3B	0.506516	0.0018993
8160670	6.13959	8.01811	AQP3	aquaporin 3 (Gill blood group)	3.67696	2.02919e-18
7982358	7.31983	6.22495	ARHGAP11A	Rho GTPase activating protein 11A	0.468174	0.00103739
8113073	9.25627	10.1361	ARRDC3	arrestin domain containing 3	1.84021	9.82708e-08
8102440	7.93989	6.78291	ARSJ	arylsulfatase family, member J	0.448449	1.49367e-07
8106962	8.28057	7.56314	ARSK	arylsulfatase family, member K	0.608181	0.0258337
7904254	9.88253	10.6233	ATP1A1	ATPase, Na+	1.67102	3.33047e-06
7965359	9.38405	9.96957	ATP2B1	ATPase, Ca++ transporting, plasma membrane 1	1.50058	0.00547099
8023497	8.15939	7.35641	ATP8B1	ATPase, class I, type 8B, member 1	0.573167	0.00188931
8170648	7.58626	8.51529	BGN	biglycan	1.904	0.0028746
8017262	7.57367	6.27619	BRIP1	BRCA1 interacting protein C-terminal helicase 1	0.406836	2.44473e-08
8035304	5.33503	8.08355	BST2	bone marrow stromal cell antigen 2	6.72029	2.29058e-38
7965423	9.68041	10.2839	BTG1	B-cell translocation gene 1, anti-proliferative	1.51934	0.0234232
8054580	6.67112	5.65454	BUB1	BUB1 budding uninhibited by benzimidazoles 1 homolog (yeast)	0.494285	0.0129248
8128553	7.71503	8.60806	BVES	blood vessel epicardial substance	1.85707	0.000427583
7968351	6.38991	7.44813	C13orf33	chromosome 13 open reading frame 33	2.08236	0.00274558
8102587	5.94991	7.12159	C4orf31	chromosome 4 open reading frame 31	2.25273	0.00319366
8135734	9.09179	8.40122	C7orf58	chromosome 7 open reading frame 58	0.619608	0.0465579
8154381	7.11942	7.99595	C9orf150	chromosome 9 open reading frame 150	1.83595	0.0199888
7913237	9.31937	9.92163	CAMK2N1	calcium	1.5181	0.0456735
8135594	10.5934	9.65749	CAV1	caveolin 1, caveolae protein, 22kDa	0.522713	0
8135587	10.5741	10.0505	CAV2	caveolin 2	0.695615	0.0111897
8089544	8.6479	7.97718	CCDC80	coiled-coil domain containing 80	0.628193	0.0208382
8102643	7.97866	6.83642	CCNA2	cyclin A2	0.453055	9.02043e-09
7983969	7.23015	5.80945	CCNB2	cyclin B2	0.37353	2.50273e-05
8151871	7.03793	5.89954	CCNE2	cyclin E2	0.454266	0.00015375
8154233	6.02685	7.14476	CD274	CD274 molecule	2.17032	0.029598
7927710	6.35103	5.11915	CDC2	cell division cycle 2, G1 to S and G2 to M	0.425761	0.0417086
8051573	8.54074	7.78304	CDC42EP3	CDC42 effector protein (Rho GTPase binding) 3	0.591438	0.00846162
8007071	7.7284	6.50734	CDC6	cell division cycle 6 homolog (S. cerevisiae)	0.428969	1.54081e-08
8138489	6.83671	5.80944	CDCA7L	cell division cycle associated 7-like	0.490636	0.0052062
8086517	7.78136	8.84354	CDCP1	CUB domain containing protein 1	2.0881	6.4507e-07
8104663	10.9494	10.3309	CDH6	cadherin 6, type 2, K-cadherin (fetal kidney)	0.651327	2.74063e-05
7925525	8.20238	8.99536	CEP170	centrosomal protein 170kDa	1.73264	0.00837663
7929334	6.76052	5.65909	CEP55	centrosomal protein 55kDa	0.466055	0.0119395
7945014	8.74419	8.06347	CHEK1	CHK1 checkpoint homolog (S. pombe)	0.623852	0.00996925
8092726	7.49995	8.39796	CLDN1	claudin 1	1.8635	0.0115308
8083887	8.6215	7.58214	CLDN11	claudin 11 (oligodendrocyte transmembrane protein)	0.486543	7.51285e-08
8149927	9.26596	10.0044	CLU	clusterin	1.66837	1.96873e-05
7910022	6.96316	7.80058	CNIH3	cornichon homolog 3 (Drosophila)	1.78685	0.0052055
8148029	7.36142	5.79625	COLEC10	collectin sub-family member 10 (C-type lectin)	0.337936	2.50742e-11
8098204	6.13525	7.56425	CPE	carboxypeptidase E	2.6926	8.65557e-08
7964834	5.44753	7.34723	CPM	carboxypeptidase M	3.73136	1.76683e-15
7921099	7.01639	8.26308	CRABP2	cellular retinoic acid binding protein 2	2.37295	4.93593e-07
7951662	8.55805	9.3591	CRYAB	crystallin, alpha B	1.74237	0.00389093
7965090	8.56057	7.67862	CSRP2	cysteine and glycine-rich protein 2	0.542636	1.3453e-05
8065412	4.7165	6.37115	CST1	cystatin SN	3.14848	1.6714e-08
7902687	9.55651	8.92636	CYR61	cysteine-rich, angiogenic inducer, 61	0.646108	0.00517186
7965410	11.7125	11.2723	DCN	decorin	0.73702	0.00363191
7917347	9.75888	8.87751	DDAH1	dimethylarginine dimethylaminohydrolase 1	0.542853	2.23675e-06
7916898	7.26618	6.05615	DEPDC1	DEP domain containing 1	0.432257	3.14438e-06
7947512	9.60063	8.8545	DKFZP586H2123	regeneration associated muscle protease	0.596198	0.015574
7979307	7.30574	6.02148	DLG7	discs, large homolog 7 (Drosophila)	0.410582	6.15496e-07
8059413	7.74132	6.70668	DOCK10	dedicator of cytokinesis 10	0.488137	5.1221e-05
7909568	7.37556	6.22275	DTL	denticleless homolog (Drosophila)	0.449748	0.0140829
7972157	8.52519	9.66136	EDNRB	endothelin receptor type B	2.19798	6.88948e-11
7999387	7.64261	8.64336	EMP2	epithelial membrane protein 2	2.00104	2.45975e-06
8122099	7.89613	6.87235	ENPP1	ectonucleotide pyrophosphatase	0.491826	8.94646e-06
8095728	8.71052	9.67884	EREG	epiregulin	1.95656	8.79198e-10
7910997	7.14673	5.86582	EXO1	exonuclease 1	0.411536	0.00180486
8122150	7.61804	8.52375	EYA4	eyes absent homolog 4 (Drosophila)	1.87347	0.00297026
7917875	10.0379	9.52092	F3	coagulation factor III (thromboplastin, tissue factor)	0.698839	0.0438543
7940147	6.35694	4.80521	FAM111B	family with sequence similarity 111, member B	0.3411	0.00857013
8056257	9.55859	8.9841	FAP	fibroblast activation protein, alpha	0.671523	0.0140229
7935058	9.6974	9.08155	FER1L3	fer-1-like 3, myoferlin (C. elegans)	0.652545	0.0100948
8096050	8.8378	8.08803	FGF5	fibroblast growth factor 5	0.594699	0.00144384
8065071	6.37991	7.46613	FLRT3	fibronectin leucine rich transmembrane protein 3	2.12317	0.0181732
7942064	8.06287	9.11547	GAL	galanin prepropeptide	2.07427	1.03531e-07
7917516	10.0768	9.5244	GBP1	guanylate binding protein 1, interferon-inducible, 67kDa	0.681896	0.000679107
8027002	7.16427	8.40826	GDF15	growth differentiation factor 15	2.36852	1.50292e-09
8174103	10.5933	11.1426	GK	glycerol kinase	1.46342	2.59013e-05
8142687	8.53858	7.70101	GPR37	G protein-coupled receptor 37 (endothelin receptor type B-like)	0.559586	0.000706655
7996081	5.42333	6.465	GPR56	G protein-coupled receptor 56	2.0586	0.022384
8139656	6.66774	7.70072	GRB10	growth factor receptor-bound protein 10	2.04624	0.00174502
7982377	11.6495	11.1627	GREM1	gremlin 1, cysteine knot superfamily, homolog (Xenopus laevis)	0.713603	0.00295551
8097628	5.63968	6.90494	HHIP	hedgehog interacting protein	2.40371	5.93097e-06
8124527	8.49631	6.82524	HIST1H1B	histone cluster 1, H1b	0.31402	0
8117377	9.53848	8.75168	HIST1H1E	histone cluster 1, H1e	0.579628	0.00350993
8117594	8.14619	6.83659	HIST1H2BM	histone cluster 1, H2bm	0.403431	6.19332e-08
8124388	8.28325	6.66396	HIST1H3B	histone cluster 1, H3b	0.325495	0
8124531	9.55684	8.80563	HIST1H3I	histone cluster 1, H3i	0.594104	1.56457e-05
8117368	8.37362	7.08685	HIST1H4C	histone cluster 1, H4c	0.409867	3.76112e-11
8124534	7.0815	5.95905	HIST1H4L	histone cluster 1, H4l	0.459313	8.50554e-05
8179041	11.3054	12.0782	HLA-A	major histocompatibility complex, class I, A	1.70867	1.96873e-14
8179049	9.80588	10.4671	HLA-A	major histocompatibility complex, class I, A	1.58139	6.35501e-05
8177732	8.04873	8.69098	HLA-A	major histocompatibility complex, class I, A	1.56076	0.00373697
8117800	7.42091	8.10747	HLA-A	major histocompatibility complex, class I, A	1.60945	0.00820936
8179731	10.5847	11.3749	HLA-B	major histocompatibility complex, class I, B	1.72931	7.53037e-11
8178498	9.51462	10.2404	HLA-B	major histocompatibility complex, class I, B	1.65378	6.12075e-08
8178489	10.03	10.7376	HLA-C	major histocompatibility complex, class I, C	1.63307	1.24525e-07
8040238	7.47133	8.36514	HPCAL1	hippocalcin-like 1	1.85808	0.000147773
7997491	5.60083	6.87122	HSD17B2	hydroxysteroid (17-beta) dehydrogenase 2	2.41226	4.26869e-06
8133721	10.8028	10.2559	HSPB1	heat shock 27kDa protein 1	0.6845	2.24967e-05
8117120	7.37699	8.27319	ID4	inhibitor of DNA binding 4, dominant negative helix-loop-helix protein	1.86115	0.0272628
7976443	7.37759	9.84191	IFI27	interferon, alpha-inducible protein 27	5.51868	3.01347e-46
7914127	11.0439	11.8002	IFI6	interferon, alpha-inducible protein 6	1.68915	8.81448e-12
7937335	9.14293	10.2498	IFITM1	interferon induced transmembrane protein 1 (9-27)	2.15374	2.48268e-12
8054712	5.67041	7.39784	IL1A	interleukin 1, alpha	3.31137	3.61049e-13
8046380	8.12755	9.18788	ITGA6	integrin, alpha 6	2.08541	5.23599e-12
7989647	7.59806	6.43466	KIAA0101	KIAA0101	0.44646	0.00140562
8099721	6.86715	7.91989	KIAA0746	KIAA0746 protein	2.07446	0.00266911
7929258	6.63157	5.37107	KIF11	kinesin family member 11	0.417399	0.000265804
7947248	7.58027	6.43523	KIF18A	kinesin family member 18A	0.452178	1.73901e-06
8108301	7.19861	5.7216	KIF20A	kinesin family member 20A	0.359233	1.06565e-10
7984540	8.25529	7.39251	KIF23	kinesin family member 23	0.549894	0.020051
8168146	6.57873	5.68855	KIF4A	kinesin family member 4A	0.539548	0.000606757
8128991	8.76736	9.53875	LAMA4	laminin, alpha 4	1.70692	0.000101724
8099524	6.84332	5.92049	LDB2	LIM domain binding 2	0.527474	0.023649
7923386	7.28543	6.14944	LMOD1	leiomodin 1 (smooth muscle)	0.455022	0.000611145
8105348	10.0227	9.45955	LOC493869	similar to RIKEN cDNA 2310016C16	0.676802	0.00354465
8091715	8.24586	7.42835	LXN	latexin	0.567421	8.51136e-07
8037301	6.4435	7.43813	LYPD3	LY6	1.99256	0.0103157
8083494	9.54321	10.3257	MME	membrane metallo-endopeptidase	1.72007	6.36174e-07
7951271	12.1696	12.4998	MMP1	matrix metallopeptidase 1 (interstitial collagenase)	1.25717	0.024429
7951284	8.78784	10.2426	MMP3	matrix metallopeptidase 3 (stromelysin 1, progelatinase)	2.7412	6.84774e-31
8090098	8.88198	7.99298	MYLK	myosin light chain kinase	0.53999	9.61529e-05
7933084	9.20388	10.1027	NAMPT	nicotinamide phosphoribosyltransferase	1.86454	1.08394e-12
8142120	9.74987	10.5424	NAMPT	nicotinamide phosphoribosyltransferase	1.7321	1.13141e-11
8094278	8.12947	6.90133	NCAPG	non-SMC condensin I complex, subunit G	0.426869	6.02135e-05
7922773	5.96195	7.10864	NCF2	neutrophil cytosolic factor 2 (65kDa, chronic granulomatous disease, autosomal 2)	2.21405	0.000176791
7902495	9.56392	9.15905	NEXN	nexilin (F actin binding protein)	0.755302	0.0106399
8008627	7.15946	8.10316	NOG	noggin	1.92345	0.00188207
8104746	7.32773	8.16186	NPR3	natriuretic peptide receptor C	1.78279	0.0010005
8002303	9.98877	10.7277	NQO1	NAD(P)H dehydrogenase, quinone 1	1.66894	6.54269e-07
8055952	6.5942	7.86702	NR4A2	nuclear receptor subfamily 4, group A, member 2	2.41632	2.0268e-05
7906930	7.07177	5.57382	NUF2	NUF2, NDC80 kinetochore complex component, homolog (S. cerevisiae)	0.354056	3.54931e-07
8157487	7.77297	6.73321	PAPPA	pregnancy-associated plasma protein A, pappalysin 1	0.486407	4.96635e-05
7984524	6.5374	7.68334	PAQR5	progestin and adipoQ receptor family member V	2.2129	9.04112e-05
8149955	7.62908	6.32213	PBK	PDZ binding kinase	0.404176	5.95536e-07
8102792	9.80555	8.77972	PCDH18	protocadherin 18	0.491127	1.25371e-11
8144802	6.61513	5.72624	PDGFRL	platelet-derived growth factor receptor-like	0.540028	0.0367911
7926807	7.91896	7.25687	PDSS1	prenyl (decaprenyl) diphosphate synthase, subunit 1	0.631963	0.03147
8024740	7.09501	9.59522	PIAS4	protein inhibitor of activated STAT, 4	5.65766	4.86013e-47
8009353	7.60082	8.45538	PITPNC1	phosphatidylinositol transfer protein, cytoplasmic 1	1.80821	0.0464783
8150509	10.6187	11.176	PLAT	plasminogen activator, tissue	1.47153	1.23413e-06
8142981	6.6435	8.7975	PODXL	podocalyxin-like	4.45058	9.09307e-31
7991406	7.78555	6.78456	PRC1	protein regulator of cytokinesis 1	0.499659	0.00255232
7978407	7.70152	6.86226	PRKD1	protein kinase D1	0.558931	0.00171285
8102468	7.92583	7.10506	PRSS12	protease, serine, 12 (neurotrypsin, motopsin)	0.566141	0.0315872
7922976	8.27396	9.71114	PTGS2	prostaglandin-endoperoxide synthase 2 (prostaglandin G	2.7079	9.09242e-20
8083594	7.9253	8.90558	PTX3	pentraxin-related gene, rapidly induced by IL-1 beta	1.97284	0.00016139
8078330	7.87215	6.96637	RBMS3	RNA binding motif, single stranded interacting protein	0.533742	0.00121877
7906919	7.82774	8.91364	RGS4	regulator of G-protein signaling 4	2.12269	6.70875e-08
8169174	5.52169	6.87856	RNF128	ring finger protein 128	2.56129	3.69987e-05
8121916	5.57753	6.59204	RSPO3	R-spondin 3 homolog (Xenopus laevis)	2.02022	0.021513
8036103	5.31155	6.48396	SBSN	suprabasin	2.25388	0.0356531
8079896	6.54485	7.61609	SEMA3F	sema domain, immunoglobulin domain (Ig), short basic domain, secreted, (semaphorin) 3F	2.10124	0.000222629
8021635	10.3745	11.1367	SERPINB2	serpin peptidase inhibitor, clade B (ovalbumin), member 2	1.69598	4.25397e-13
8021623	7.72679	8.86979	SERPINB7	serpin peptidase inhibitor, clade B (ovalbumin), member 7	2.2084	1.14479e-05
8059376	11.0346	11.6394	SERPINE2	serpin peptidase inhibitor, clade E (nexin, plasminogen activator inhibitor type 1), member 2	1.52075	3.7092e-11
8001133	8.70997	7.34399	SHCBP1	SHC SH2-domain binding protein 1	0.387971	4.03067e-09
8021081	6.58999	8.41935	SLC14A1	solute carrier family 14 (urea transporter), member 1 (Kidd blood group)	3.5538	8.5969e-22
8017843	6.58056	7.81225	SLC16A6	solute carrier family 16, member 6 (monocarboxylic acid transporter 7)	2.34841	7.29696e-06
7940717	9.13509	9.87533	SLC3A2	solute carrier family 3 (activators of dibasic and neutral amino acid transport), member 2	1.67046	0.00168699
8068361	8.49532	9.2596	SLC5A3	solute carrier family 5 (inositol transporters), member 3	1.69852	0.00229894
7965206	8.7431	10.1234	SLC6A15	solute carrier family 6, member 15	2.60324	5.44144e-21
8102800	8.54633	10.1911	SLC7A11	solute carrier family 7, (cationic amino acid transporter, y+ system) member 11	3.12702	3.86043e-25
8003298	7.96353	8.88312	SLC7A5	solute carrier family 7 (cationic amino acid transporter, y+ system), member 5	1.89158	0.000261995
8094301	7.13255	6.15282	SLIT2	slit homolog 2 (Drosophila)	0.507073	0.0102086
8060745	7.21923	8.18792	SMOX	spermine oxidase	1.95707	0.000119942
7922408	7.34491	6.81586	SNORD78	small nucleolar RNA, C	0.69301	0.000785014
7922404	5.94894	4.98534	SNORD80	small nucleolar RNA, C	0.512776	0.00058286
8081620	6.15991	8.03993	TAGLN3	transgelin 3	3.68081	8.13346e-19
8177947	6.1281	4.93422	TCF19	transcription factor 19 (SC1)	0.437127	0.0110723
8141016	11.7634	12.3165	TFPI2	tissue factor pathway inhibitor 2	1.46722	1.16595e-11
8066214	8.39482	9.48293	TGM2	transglutaminase 2 (C polypeptide, protein-glutamine-gamma-glutamyltransferase)	2.12595	3.29719e-10
7982597	11.991	11.1467	THBS1	thrombospondin 1	0.556957	0
7952268	9.13453	8.53216	THY1	Thy-1 cell surface antigen	0.658669	0.0196048
8163637	8.97124	8.0499	TNC	tenascin C (hexabrachion)	0.528016	1.8259e-06
7922343	7.90627	6.40716	TNFSF4	tumor necrosis factor (ligand) superfamily, member 4 (tax-transcriptionally activated glycoprotein 1, 34kDa)	0.353771	0
8061579	7.25668	6.34349	TPX2	TPX2, microtubule-associated, homolog (Xenopus laevis)	0.531009	0.0263972
8120838	6.31209	4.97952	TTK	TTK protein kinase	0.397061	2.71514e-05
7904726	11.1843	11.8787	TXNIP	thioredoxin interacting protein	1.6182	1.61974e-10
8143127	6.30212	8.14639	UNQ1940	HWKM1940	3.5907	1.1472e-17
7933707	7.54779	6.66474	ZWINT	ZW10 interactor	0.542219	0.0210313
8027352	7.85085	6.99328			0.551882	5.30978e-06
7969574	8.84749	9.50144			1.57346	0.0125803
