# Supplementary material for: Sumoylation at chromatin governs coordinated repression of a transcriptional program essential for cell growth and proliferation
Source: HighWire-hosted journal article supplement (doi:10.1101/gr.154872.113), 2013-07-26
Supplement: Supplemental_Table6.xlsx [file Supplemental_Table6.xlsx]

## Sheet: Feuil1
Probe.Set.ID	Average shControl	Average shUBC9	Fold Change shUbc9.vs.shControl	Bonf_C.vs.U	Gene.Symbol	Gene.Description
8006433	10.5774	6.97339	-12.1691	0	CCL2	chemokine (C-C motif) ligand 2
8076481	10.609	7.98694	-6.55863	0	CYB5R3	cytochrome b5 reductase 3
7905329	10.1867	7.14889	-8.03618	0	MLLT11	myeloid/lymphoid or mixed-lineage leukemia (trithorax homolog, Drosophila); translocated to, 11
8092726	9.83082	7.2134	-6.04058	0	CLDN1	claudin 1
8037283	10.0124	7.72688	-4.81117	0	PSG4	pregnancy specific beta-1-glycoprotein 4
8113709	10.757	8.84073	-3.73291	0	LOX	lysyl oxidase
7917347	9.75529	7.32032	-5.29055	0	DDAH1	dimethylarginine dimethylaminohydrolase 1
8002303	9.81705	7.56187	-4.49701	0	NQO1	NAD(P)H dehydrogenase, quinone 1
8111772	10.5825	8.80565	-3.4921	0	DAB2	disabled homolog 2, mitogen-responsive phosphoprotein (Drosophila)
8059177	9.1345	6.10582	-8.26523	0	TUBA4A	tubulin, alpha 4a
7966135	10.3042	8.44584	-3.61424	0	CORO1C	coronin, actin binding protein, 1C
7957260	10.6118	8.86734	-3.27602	0	GLIPR1	GLI pathogenesis-related 1
8128716	9.78137	7.76835	-4.10675	0	CD164	CD164 molecule, sialomucin
8106098	10.0451	8.18079	-3.69377	0	MAP1B	microtubule-associated protein 1B
7920600	9.81071	7.81843	-3.99783	0	SHC1	SHC (Src homology 2 domain containing) transforming protein 1
7949588	11.4074	10.1092	-2.50071	0	CD248	CD248 molecule, endosialin
8116651	10.7591	9.29388	-2.8527	0	---	---
8072678	9.2434	6.93314	-5.05389	0	HMOX1	heme oxygenase (decycling) 1
7951662	9.51079	7.44817	-4.22616	0	CRYAB	crystallin, alpha B
8106252	8.84902	6.26766	-5.98586	0	HEXB	hexosaminidase B (beta polypeptide)
8116649	11.1904	9.79549	-2.47626	0	TUBB2A	tubulin, beta 2A
8116653	11.1904	9.79549	-2.47626	0	TUBB2A	tubulin, beta 2A
8141295	10.9354	9.53006	-2.61007	0	ATP5J2	ATP synthase, H+ transporting, mitochondrial F0 complex, subunit F2
8041447	10.0204	8.3199	-3.20776	0	CRIM1	cysteine rich transmembrane BMP regulator 1 (chordin-like)
7961142	8.55979	5.2274	-10.3322	0	OLR1	oxidized low density lipoprotein (lectin-like) receptor 1
8072577	8.75565	6.35155	-5.31754	0	YWHAH	tyrosine 3-monooxygenase/tryptophan 5-monooxygenase activation protein, eta polypeptide
7943998	9.24242	7.1029	-4.45051	0	NNMT	nicotinamide N-methyltransferase
7934367	8.56253	6.12228	-5.57759	0	ANXA7	annexin A7
8169240	8.77459	6.62019	-4.47904	0	PRPS1	phosphoribosyl pyrophosphate synthetase 1
8141016	10.0616	8.59188	-2.80399	0	TFPI2	tissue factor pathway inhibitor 2
8096050	9.40153	7.68267	-3.52722	0	FGF5	fibroblast growth factor 5
8015210	8.87493	6.83066	-4.11646	0	KRTAP2-4	keratin associated protein 2-4
8019576	8.87493	6.83066	-4.11646	0	KRTAP2-4	keratin associated protein 2-4
8120967	10.3867	8.99232	-2.56532	0	NT5E	5'-nucleotidase, ecto (CD73)
7962516	8.90326	6.93612	-3.95047	0	SLC38A1	solute carrier family 38, member 1
8122426	8.51617	6.36779	-4.23891	0	PHACTR2	phosphatase and actin regulator 2
8143132	10.1307	8.78765	-2.62141	0	LUZP6	leucine zipper protein 6
7983228	9.40912	7.66949	-3.25282	0	MAP1A	microtubule-associated protein 1A
8042788	10.8519	9.71779	-2.21748	0	ACTG2	actin, gamma 2, smooth muscle, enteric
7984079	8.64416	6.70383	-3.8863	0	TPM1	tropomyosin 1 (alpha)
7934906	10.8002	9.67928	-2.18222	0	ACTA2	actin, alpha 2, smooth muscle, aorta
7937990	7.51501	4.18024	-9.39282	0	HBG1	hemoglobin, gamma A
7937993	7.51501	4.18024	-9.39282	0	HBG2	hemoglobin, gamma G
8107234	8.34384	6.32137	-3.94735	0	MAN2A1	mannosidase, alpha, class 2A, member 1
7952268	10.5515	9.4253	-2.22086	0	THY1	Thy-1 cell surface antigen
7983512	8.00621	5.10119	-6.47418	0	SQRDL	sulfide quinone reductase-like (yeast)
8036151	7.86825	4.98105	-7.46376	0	HSPB6	heat shock protein, alpha-crystallin-related, B6
7915472	9.43313	7.92723	-2.94751	0	SLC2A1	solute carrier family 2 (facilitated glucose transporter), member 1
7982597	11.1596	10.1144	-2.01578	0	THBS1	thrombospondin 1
8102532	9.01457	7.3569	-3.32163	0	PDE5A	phosphodiesterase 5A, cGMP-specific
8045289	8.07966	5.98794	-4.48875	0	RHOQ	ras homolog gene family, member Q
8094778	11.6521	10.7361	-1.9182	0	UCHL1	ubiquitin carboxyl-terminal esterase L1 (ubiquitin thiolesterase)
7916432	8.70239	6.9705	-3.36785	0	DHCR24	24-dehydrocholesterol reductase
8132710	6.75148	3.92392	-8.79768	0	C7orf69	chromosome 7 open reading frame 69
7980005	8.16348	6.1729	-3.96481	0	NUMB	numb homolog (Drosophila)
7946048	7.56534	4.78267	-7.46749	0	HBG1	hemoglobin, gamma A
7946054	7.56534	4.78267	-7.46749	0	HBG1	hemoglobin, gamma A
8004510	8.70118	6.97079	-3.26331	0	CD68	CD68 molecule
8129937	10.6729	9.60312	-2.08836	0	CITED2	Cbp/p300-interacting transactivator, with Glu/Asp-rich carboxy-terminal domain, 2
8102848	7.72361	4.93139	-6.47985	0	SETD7	SET domain containing (lysine methyltransferase) 7
8136200	9.68994	8.32201	-2.57116	0	CPA4	carboxypeptidase A4
7899615	9.8933	8.68192	-2.40062	0	SERINC2	serine incorporator 2
7925492	8.10566	6.08402	-3.64251	0	OPN3	opsin 3
7955694	9.53152	8.16753	-2.62123	0	IGFBP6	insulin-like growth factor binding protein 6
8154245	8.97062	7.40634	-3.00461	0	PDCD1LG2	programmed cell death 1 ligand 2
7916112	9.82937	8.58714	-2.3972	0	RAB3B	RAB3B, member RAS oncogene family
8073015	8.54691	6.93718	-3.0717	0	KDELR3	KDEL (Lys-Asp-Glu-Leu) endoplasmic reticulum protein retention receptor 3
8130556	9.47522	8.12762	-2.57056	0	SOD2	superoxide dismutase 2, mitochondrial
7930470	8.25533	6.61379	-3.17938	0	SHOC2	soc-2 suppressor of clear homolog (C. elegans)
8015208	8.58561	7.06432	-3.00914	0	KRTAP2-1	keratin associated protein 2-1
8165496	10.2521	9.05975	-2.18075	0	TUBB2C	tubulin, beta 2C
8104912	8.42623	6.81058	-3.05121	0	SKP2	S-phase kinase-associated protein 2 (p45)
7944082	9.70237	8.28666	-2.4512	0	TAGLN	transgelin
7923378	9.39422	7.94165	-2.64169	0	CSRP1	cysteine and glycine-rich protein 1
7951271	8.05973	6.17466	-3.37026	0	MMP1	matrix metallopeptidase 1 (interstitial collagenase)
8161044	11.2322	10.3251	-1.82407	0	TPM2	tropomyosin 2 (beta)
8167449	10.1496	9.13846	-2.10741	0	PLP2	proteolipid protein 2 (colonic epithelium-enriched)
7963054	11.753	10.924	-1.76722	0	TUBA1A	tubulin, alpha 1a
8036284	7.67151	5.70556	-4.29801	0	COX7A1	cytochrome c oxidase subunit VIIa polypeptide 1 (muscle)
8104601	9.5801	8.27319	-2.45532	0	BASP1	brain abundant, membrane attached signal protein 1
7979824	10.3786	9.40089	-2.02258	0	ACTN1	actinin, alpha 1
8143054	9.94305	8.88568	-2.18661	0	AKR1B1	aldo-keto reductase family 1, member B1 (aldose reductase)
7979204	8.52868	7.11594	-2.848	0	FERMT2	fermitin family homolog 2 (Drosophila)
8015206	8.60702	7.11061	-2.78929	0	KRTAP2-1	keratin associated protein 2-1
8025828	7.68024	5.61546	-4.24235	0	LDLR	low density lipoprotein receptor
7948630	8.86881	7.3552	-2.7308	0	FADS3	fatty acid desaturase 3
7924996	8.59588	7.20605	-2.75342	0	C1orf198	chromosome 1 open reading frame 198
8144880	8.20682	6.75386	-2.84791	0	SH2D4A	SH2 domain containing 4A
8015179	7.74131	5.67865	-4.04542	0	KRTAP1-5	keratin associated protein 1-5
8019588	7.74131	5.67865	-4.04542	0	KRTAP1-5	keratin associated protein 1-5
8037374	9.11101	7.72926	-2.62834	0	PLAUR	plasminogen activator, urokinase receptor
8163402	8.51492	7.08207	-2.74666	0	ROD1	ROD1 regulator of differentiation 1 (S. pombe)
8037272	7.66626	5.38057	-4.46746	0	PSG5	pregnancy specific beta-1-glycoprotein 5
7908543	7.72658	5.72921	-3.84329	0	NEK7	NIMA (never in mitosis gene a)-related kinase 7
7924619	8.56368	7.12224	-2.71748	0	ENAH	enabled homolog (Drosophila)
8003171	9.32613	8.13484	-2.45161	0	COTL1	coactosin-like 1 (Dictyostelium)
7939120	10.0971	9.085	-2.06478	0	RCN1	reticulocalbin 1, EF-hand calcium binding domain
8041995	8.87224	7.49279	-2.64333	0	SPTBN1	spectrin, beta, non-erythrocytic 1
8167815	8.79422	7.3145	-2.66667	0	MAGED2	melanoma antigen family D, 2
8150537	7.91225	6.25283	-3.14371	0	SLC20A2	solute carrier family 20 (phosphate transporter), member 2
7985317	8.20052	6.76224	-2.78646	0	KIAA1199	KIAA1199
7942064	6.79981	4.58639	-6.1819	0	GAL	galanin prepropeptide
8019807	8.31246	6.87329	-2.75358	0	USP14	ubiquitin specific peptidase 14 (tRNA-guanine transglycosylase)
8159642	10.3277	9.37016	-1.94894	0	TUBB2C	tubulin, beta 2C
8104663	8.67227	7.27563	-2.64239	0	CDH6	cadherin 6, type 2, K-cadherin (fetal kidney)
8117045	7.50903	5.26935	-4.63775	0	RBM24	RNA binding motif protein 24
8053064	8.30174	6.85945	-2.72853	0	MOBKL1B	MOB1, Mps One Binder kinase activator-like 1B (yeast)
7946478	7.7804	6.10182	-3.23289	0	DENND5A	DENN/MADD domain containing 5A
7938485	7.67615	5.84343	-3.64005	0	MICAL2	microtubule associated monoxygenase, calponin and LIM domain containing 2
8041206	9.02989	7.76704	-2.48607	0	LBH	limb bud and heart development homolog (mouse)
8015187	7.99124	6.51009	-2.80246	0	KRTAP1-1	keratin associated protein 1-1
7982377	10.5382	9.66331	-1.84204	0	GREM1	gremlin 1, cysteine knot superfamily, homolog (Xenopus laevis)
7991335	8.3931	7.14386	-2.57017	0	ANPEP	alanyl (membrane) aminopeptidase
8113214	10.0941	9.13962	-1.98203	0	GLRX	glutaredoxin (thioltransferase)
8155754	7.21819	4.80542	-5.24936	0	MAMDC2	MAM domain containing 2
7908940	9.20579	7.86175	-2.43101	0	ATP2B4	ATPase, Ca++ transporting, plasma membrane 4
8097098	9.21715	7.9667	-2.42153	0	USP53	ubiquitin specific peptidase 53
7950906	9.82789	8.77949	-2.0898	0	CTSC	cathepsin C
8135990	8.15841	6.75325	-2.64915	0	FLNC	filamin C, gamma
8081740	7.86003	6.36053	-2.83329	0	ATP6V1A	ATPase, H+ transporting, lysosomal 70kDa, V1 subunit A
7934997	8.50536	7.20721	-2.51623	0	PPP1R3C	protein phosphatase 1, regulatory (inhibitor) subunit 3C
8019622	7.10958	4.78447	-5.13565	0	TMEM106A	transmembrane protein 106A
7906900	8.54827	7.2761	-2.49168	0	DDR2	discoidin domain receptor tyrosine kinase 2
7950307	6.3811	3.96809	-5.70606	0	UCP2	uncoupling protein 2 (mitochondrial, proton carrier)
7974455	9.79702	8.74011	-2.07844	0	MAPK1IP1L	mitogen-activated protein kinase 1 interacting protein 1-like
7978586	9.70871	8.65932	-2.12625	0	CFL2	cofilin 2 (muscle)
7963786	9.1684	7.93058	-2.36865	0	ITGA5	integrin, alpha 5 (fibronectin receptor, alpha polypeptide)
8007483	7.09606	4.83823	-5.05703	0	TMEM106A	transmembrane protein 106A
8091411	10.0377	9.01097	-1.96238	0	TM4SF1	transmembrane 4 L six family member 1
8114158	8.37192	7.10411	-2.49169	0	PPP2CA	protein phosphatase 2, catalytic subunit, alpha isozyme
8149857	8.18808	6.89535	-2.52349	0	KCTD9	potassium channel tetramerisation domain containing 9
8155169	8.10305	6.77647	-2.54996	0	RECK	reversion-inducing-cysteine-rich protein with kazal motifs
8103922	7.67047	6.16573	-3.02813	0	CASP3	caspase 3, apoptosis-related cysteine peptidase
7948332	7.53297	5.58613	-3.61093	0	LPXN	leupaxin
7966202	8.27151	7.01876	-2.4567	0	KCTD10	potassium channel tetramerisation domain containing 10
7905220	9.42495	8.25961	-2.22058	0	ECM1	extracellular matrix protein 1
7954196	8.82933	7.6023	-2.34656	0	MGST1	microsomal glutathione S-transferase 1
8090098	8.38948	7.16893	-2.40687	0	MYLK	myosin light chain kinase
7987439	7.28503	5.37404	-4.07921	0	GPR176	G protein-coupled receptor 176
8005171	7.1527	5.11774	-4.46161	0	TRPV2	transient receptor potential cation channel, subfamily V, member 2
7976567	8.42946	7.1009	-2.37151	0	BDKRB1	bradykinin receptor B1
8064375	8.20127	6.94343	-2.41673	0	SRXN1	sulfiredoxin 1 homolog (S. cerevisiae)
8114536	7.17397	5.22785	-4.14152	0	TMEM173	transmembrane protein 173
7969438	8.10013	6.73348	-2.44476	0	LMO7	LIM domain 7
8058221	8.67083	7.47013	-2.3079	0	TRAK2	trafficking protein, kinesin binding 2
8088979	7.90172	6.59122	-2.56625	0	VGLL3	vestigial like 3 (Drosophila)
7958174	9.82303	8.82581	-1.97161	0	TXNRD1	thioredoxin reductase 1
8023727	9.38563	8.31736	-2.15398	0	DSEL	dermatan sulfate epimerase-like
7906878	8.16961	6.90637	-2.39003	0	DDR2	discoidin domain receptor tyrosine kinase 2
8095080	8.87793	7.67847	-2.27434	0	PDGFRA	platelet-derived growth factor receptor, alpha polypeptide
8155327	7.38442	5.48067	-3.55419	0	ALDH1B1	aldehyde dehydrogenase 1 family, member B1
8078350	8.36367	7.13115	-2.32047	0	TGFBR2	transforming growth factor, beta receptor II (70/80kDa)
8143307	9.60189	8.59464	-2.04236	0	HIPK2	homeodomain interacting protein kinase 2
8060897	7.38203	5.52728	-3.44743	0	PLCB4	phospholipase C, beta 4
8090193	9.59768	8.52292	-2.03014	0	HEG1	HEG homolog 1 (zebrafish)
8115831	8.18065	6.97239	-2.34171	0	DUSP1	dual specificity phosphatase 1
8084345	9.67197	8.67724	-1.99718	0	AP2M1	adaptor-related protein complex 2, mu 1 subunit
7992205	6.95417	4.86296	-4.3128	0	UBE2I	ubiquitin-conjugating enzyme E2I (UBC9 homolog, yeast)
8050702	8.42041	7.20748	-2.27099	0	TP53I3	tumor protein p53 inducible protein 3
8082788	8.85869	7.71283	-2.21727	0	CDV3	CDV3 homolog (mouse)
7951284	6.13842	3.81543	-4.98944	0	MMP3	matrix metallopeptidase 3 (stromelysin 1, progelatinase)
8081135	8.75483	7.5831	-2.21833	0	CDV3	CDV3 homolog (mouse)
7978718	8.66844	7.46148	-2.2295	0	SEC23A	Sec23 homolog A (S. cerevisiae)
8109407	7.42366	6.02333	-2.85009	0	GALNT10	UDP-N-acetyl-alpha-D-galactosamine:polypeptide N-acetylgalactosaminyltransferase 10 (GalNAc-T10)
7940565	7.79767	6.64382	-2.44745	0	FADS2	fatty acid desaturase 2
8112668	6.49588	4.3336	-4.70206	0	GCNT4	glucosaminyl (N-acetyl) transferase 4, core 2
8037251	7.45699	5.84385	-3.04528	0	PSG7	pregnancy specific beta-1-glycoprotein 7 (gene/pseudogene)
8099132	7.59854	5.7945	-3.08457	0	CYTL1	cytokine-like 1
8023497	8.79059	7.7051	-2.19007	0	ATP8B1	ATPase, aminophospholipid transporter, class I, type 8B, member 1
8047097	7.6419	6.16228	-2.64897	0	GLS	glutaminase
8136918	8.95127	7.8249	-2.17908	0	ZYX	zyxin
8046895	7.68938	6.25674	-2.52424	0	FAM171B	family with sequence similarity 171, member B
7983350	7.81886	6.36463	-2.46074	0	EIF3J	eukaryotic translation initiation factor 3, subunit J
8078461	6.86121	4.84046	-4.2311	0	FBXL2	F-box and leucine-rich repeat protein 2
8157270	9.28211	8.21633	-2.11551	0	SLC31A1	solute carrier family 31 (copper transporters), member 1
8134552	8.15383	6.95197	-2.27515	0	ARPC1B	actin related protein 2/3 complex, subunit 1B, 41kDa
7909967	10.3257	9.53967	-1.71857	0	CAPN2	calpain 2, (m/II) large subunit
8135763	6.18191	3.92912	-4.7151	0	WNT16	wingless-type MMTV integration site family, member 16
7957478	7.98138	6.88882	-2.30944	0	TMTC3	transmembrane and tetratricopeptide repeat containing 3
8082248	8.17025	6.97465	-2.2645	0	MGC72080	MGC72080 pseudogene
7930921	8.92286	7.90639	-2.14654	0	BAG3	BCL2-associated athanogene 3
8063478	7.72275	6.48111	-2.4854	0	C20orf108	chromosome 20 open reading frame 108
8089835	10.5109	9.81058	-1.6708	0	FSTL1	follistatin-like 1
8138789	7.61623	6.283	-2.50857	0	JAZF1	JAZF zinc finger 1
8045835	9.80719	8.88094	-1.87828	0	GALNT5	UDP-N-acetyl-alpha-D-galactosamine:polypeptide N-acetylgalactosaminyltransferase 5 (GalNAc-T5)
7990151	11.0568	10.4289	-1.58364	0	PKM2	pyruvate kinase, muscle
7916843	10.1114	9.34018	-1.74723	0	GNG12	guanine nucleotide binding protein (G protein), gamma 12
7929958	7.64856	6.30351	-2.54012	0	BTRC	beta-transducin repeat containing
8082244	8.09654	6.95862	-2.25267	0	MGC72080	MGC72080 pseudogene
8099340	9.29851	8.21973	-2.07063	0	WDR1	WD repeat domain 1
7947358	9.03345	7.98362	-2.11578	0	RCN1	reticulocalbin 1, EF-hand calcium binding domain
8013307	8.92103	7.81216	-2.11867	0	FOXO3B	forkhead box O3B pseudogene
8129418	8.32099	7.24814	-2.17325	0	PTPRK	protein tyrosine phosphatase, receptor type, K
8026806	7.03874	5.36001	-3.497	0	GLT25D1	glycosyltransferase 25 domain containing 1
8171684	7.94186	6.75577	-2.28392	0	SH3KBP1	SH3-domain kinase binding protein 1
8164269	9.21421	8.19991	-2.06739	0	ENG	endoglin
8043932	9.44024	8.54715	-1.98578	0	RPL31	ribosomal protein L31
8055688	10.9598	10.3448	-1.58347	0	RND3	Rho family GTPase 3
7904018	8.72825	7.65437	-2.10947	0	CTTNBP2NL	CTTNBP2 N-terminal like
8101925	7.53105	6.15579	-2.67684	0	MAPKSP1	MAPK scaffold protein 1
8143957	7.53642	6.17612	-2.6104	0	RHEB	Ras homolog enriched in brain
7969428	9.16015	8.18764	-2.0665	0	UCHL3	ubiquitin carboxyl-terminal esterase L3 (ubiquitin thiolesterase)
7923516	7.98134	6.84561	-2.23366	0	CYB5R1	cytochrome b5 reductase 1
8081277	8.23095	7.2172	-2.15145	0	NIT2	nitrilase family, member 2
8132406	8.44923	7.27951	-2.11589	0	RALA	v-ral simian leukemia viral oncogene homolog A (ras related)
8015607	8.83792	7.72957	-2.08516	0	STAT3	signal transducer and activator of transcription 3 (acute-phase response factor)
8157125	9.2323	8.16822	-2.04303	0	RAD23B	RAD23 homolog B (S. cerevisiae)
8079964	7.40275	5.99641	-2.84745	0	---	---
7935180	9.95204	9.13794	-1.77022	0	PDLIM1	PDZ and LIM domain 1
8042270	7.9732	6.80427	-2.24799	0	UGP2	UDP-glucose pyrophosphorylase 2
7990566	8.49189	7.38081	-2.09976	0	ETFA	electron-transfer-flavoprotein, alpha polypeptide
7908694	8.91548	7.89813	-2.06668	0	NAV1	neuron navigator 1
7945873	8.08394	6.95405	-2.16993	0	MGC72080	MGC72080 pseudogene
7968787	8.11056	6.94299	-2.17302	0	MGC72080	MGC72080 pseudogene
7971241	8.11534	6.95842	-2.17089	0	MGC72080	MGC72080 pseudogene
8091283	9.96161	9.1823	-1.75599	0	PLOD2	procollagen-lysine, 2-oxoglutarate 5-dioxygenase 2
8045887	8.11895	6.96363	-2.16741	0	MGC72080	MGC72080 pseudogene
8123989	7.52158	6.16009	-2.48337	0	RANBP9	RAN binding protein 9
8167965	10.1269	9.36393	-1.71001	0	MSN	moesin
7905147	8.62284	7.56292	-2.06088	0	C1orf54	chromosome 1 open reading frame 54
8112967	7.89226	6.78654	-2.20356	0	TMEM167A	transmembrane protein 167A
8172035	9.40481	8.368	-1.96496	0	DYNLT3	dynein, light chain, Tctex-type 3
8109283	8.95869	7.89839	-2.04088	0	NDST1	N-deacetylase/N-sulfotransferase (heparan glucosaminyl) 1
8127854	8.39823	7.38497	-2.0759	0	ME1	malic enzyme 1, NADP(+)-dependent, cytosolic
8123644	9.35678	8.40092	-1.96294	0	TUBB2A	tubulin, beta 2A
7977270	8.42141	7.43412	-2.06676	0	LOC388022	hypothetical gene supported by AK131040
8082408	10.0037	9.20985	-1.72251	0	SEC61A1	Sec61 alpha 1 subunit (S. cerevisiae)
8042439	7.77286	6.56534	-2.26149	0	ANTXR1	anthrax toxin receptor 1
8156706	6.56802	4.61518	-4.04341	0	TMOD1	tropomodulin 1
7943293	7.79584	6.4937	-2.23699	0	ENDOD1	endonuclease domain containing 1
7907222	7.4346	6.03422	-2.62145	0	PRRX1	paired related homeobox 1
8156319	7.85969	6.75697	-2.19449	0	MGC72080	MGC72080 pseudogene
7932311	9.21094	8.18628	-1.99049	0	RSU1	Ras suppressor protein 1
8068413	7.03713	5.36765	-3.147	0	CBR3	carbonyl reductase 3
8094911	7.62231	6.34699	-2.34863	0	ATP10D	ATPase, class V, type 10D
8138566	7.74527	6.50942	-2.23937	0	IGF2BP3	insulin-like growth factor 2 mRNA binding protein 3
8006779	8.25891	7.22774	-2.0573	0	ARHGAP23	Rho GTPase activating protein 23
8047161	9.01384	7.97667	-2.00195	0	OBFC2A	oligonucleotide/oligosaccharide-binding fold containing 2A
8051928	7.48324	6.30168	-2.41512	0	PREPL	prolyl endopeptidase-like
7997582	6.35619	4.34868	-4.05304	0	WFDC1	WAP four-disulfide core domain 1
7968928	8.8331	7.83384	-1.99566	0	RCN1	reticulocalbin 1, EF-hand calcium binding domain
7989094	8.28913	7.23551	-2.04469	0	NEDD4	neural precursor cell expressed, developmentally down-regulated 4
7927964	6.44688	4.53615	-3.91151	0	SRGN	serglycin
7917875	9.13415	8.22064	-1.97042	0	F3	coagulation factor III (thromboplastin, tissue factor)
8128429	7.96315	6.91723	-2.10008	0	CCNC	cyclin C
8097513	8.9965	8.09284	-1.97679	0	MGST2	microsomal glutathione S-transferase 2
8082886	6.94967	5.07669	-3.28648	0	PCCB	propionyl CoA carboxylase, beta polypeptide
8127841	8.10103	7.03509	-2.04778	0	PGM3	phosphoglucomutase 3
7943882	8.50578	7.42692	-1.98877	0	PTS	6-pyruvoyltetrahydropterin synthase
7937465	10.3287	9.62797	-1.61345	0	TALDO1	transaldolase 1
8138151	8.0331	6.88136	-2.10684	0	MGC72080	MGC72080 pseudogene
7944722	6.9	5.2864	-3.26759	0	UBASH3B	ubiquitin associated and SH3 domain containing B
8091764	7.60217	6.46656	-2.25598	0	KPNA4	karyopherin alpha 4 (importin alpha 3)
8096224	8.06349	6.97648	-2.07258	0	AFF1	AF4/FMR2 family, member 1
8109093	7.64796	6.46261	-2.24374	0	ABLIM3	actin binding LIM protein family, member 3
7899016	8.69914	7.81997	-1.95728	0	SDHD	succinate dehydrogenase complex, subunit D, integral membrane protein
8093086	8.46351	7.39977	-1.97544	0	PCYT1A	phosphate cytidylyltransferase 1, choline, alpha
8117995	11.2204	10.6458	-1.48883	0	TUBB	tubulin, beta
8177858	11.2204	10.6458	-1.48883	0	TUBB	tubulin, beta
8179174	11.2204	10.6458	-1.48883	0	TUBB	tubulin, beta
7956867	6.69997	4.80611	-3.54679	0	HMGA2	high mobility group AT-hook 2
8048014	7.825	6.93088	-2.09617	0	RPE	ribulose-5-phosphate-3-epimerase
8062312	11.2832	10.7045	-1.47932	0	MYL9	myosin, light chain 9, regulatory
7942596	8.79454	7.86929	-1.94541	0	SERPINH1	serpin peptidase inhibitor, clade H (heat shock protein 47), member 1, (collagen binding protein 1)
8150830	6.92903	5.50144	-3.14505	0	LYPLA1	lysophospholipase I
8015908	8.96812	8.07662	-1.94291	0	LSM12	LSM12 homolog (S. cerevisiae)
8095697	7.00258	5.38723	-2.97311	0	CXCL1	chemokine (C-X-C motif) ligand 1 (melanoma growth stimulating activity, alpha)
8013788	7.02465	5.34841	-2.95719	0	FLOT2	flotillin 2
8042574	7.79845	6.72171	-2.11275	0	MGC72080	MGC72080 pseudogene
7898655	5.95582	3.95357	-3.9699	0	CDA	cytidine deaminase
7998063	8.32703	7.30923	-1.9756	0	TUBB3	tubulin, beta 3
8154394	7.47124	6.1914	-2.31095	0	SNAPC3	small nuclear RNA activating complex, polypeptide 3, 50kDa
7938880	7.11704	5.6054	-2.8792	0	HTATIP2	HIV-1 Tat interactive protein 2, 30kDa
8172022	9.61547	8.77888	-1.78891	0	TMEM47	transmembrane protein 47
8142886	8.17497	7.19795	-2.00355	0	UBE2H	ubiquitin-conjugating enzyme E2H (UBC8 homolog, yeast)
7911355	7.93464	6.87633	-2.06056	0	TUBB8	tubulin, beta 8
8150206	8.80949	7.92137	-1.92386	0	LSM12	LSM12 homolog (S. cerevisiae)
7930380	7.5849	6.52591	-2.17208	0	ADD3	adducin 3 (gamma)
8169811	7.10446	5.53467	-2.81153	0	OCRL	oculocerebrorenal syndrome of Lowe
8006392	8.67141	7.75748	-1.91941	0	PSMD11	proteasome (prosome, macropain) 26S subunit, non-ATPase, 11
7941236	8.19017	7.28959	-1.96895	0	CDC42EP2	CDC42 effector protein (Rho GTPase binding) 2
7934513	8.00731	6.96953	-2.02518	0	AP3M1	adaptor-related protein complex 3, mu 1 subunit
7901460	7.30548	6.06096	-2.42421	0	GPX7	glutathione peroxidase 7
8113491	6.89173	5.12345	-3.10004	0	STARD4	StAR-related lipid transfer (START) domain containing 4
7984112	8.05565	6.92868	-1.98374	0	RAB8B	RAB8B, member RAS oncogene family
8036840	7.27282	6.04799	-2.45039	0	AKT2	v-akt murine thymoma viral oncogene homolog 2
8174103	7.22083	5.87136	-2.50948	0	GK	glycerol kinase
8113504	8.84782	7.9421	-1.90081	0	C5orf13	chromosome 5 open reading frame 13
8058390	7.69372	6.55065	-2.09086	0	RAPH1	Ras association (RalGDS/AF-6) and pleckstrin homology domains 1
8103822	8.13336	7.15513	-1.95805	0	VEGFC	vascular endothelial growth factor C
7966315	9.96429	9.18266	-1.64724	0	ARPC3	actin related protein 2/3 complex, subunit 3, 21kDa
8154692	6.74698	5.0009	-3.23213	0	TEK	TEK tyrosine kinase, endothelial
8153002	7.66085	6.64214	-2.089	0	NDRG1	N-myc downstream regulated 1
8017210	7.39379	6.17005	-2.33205	0	AP1S2	adaptor-related protein complex 1, sigma 2 subunit
7983321	8.20696	7.13758	-1.94438	0	CASC4	cancer susceptibility candidate 4
8137979	11.5503	11.0465	-1.44278	0	ACTB	actin, beta
7952205	6.84282	5.29427	-2.9647	0	MCAM	melanoma cell adhesion molecule
7934753	9.05306	8.15004	-1.88617	0	EIF5AL1	eukaryotic translation initiation factor 5A-like 1
8176133	7.92582	6.93989	-1.99528	0	G6PD	glucose-6-phosphate dehydrogenase
8163202	8.74788	7.82891	-1.88464	0	SVEP1	sushi, von Willebrand factor type A, EGF and pentraxin domain containing 1
8024111	10.8527	10.2617	-1.49836	0	CNN2	calponin 2
8101260	7.69804	6.55074	-2.08962	0	ANTXR2	anthrax toxin receptor 2
7927285	8.34378	7.39231	-1.91283	0	RHEB	Ras homolog enriched in brain
8086953	9.84545	9.24273	-1.65372	0	SHISA5	shisa homolog 5 (Xenopus laevis)
8173941	7.52315	6.4198	-2.16384	0	TSPAN6	tetraspanin 6
8168424	7.07024	5.63522	-2.72755	0	SLC16A2	solute carrier family 16, member 2 (monocarboxylic acid transporter 8)
8021635	9.82682	8.95444	-1.69258	0	SERPINB2	serpin peptidase inhibitor, clade B (ovalbumin), member 2
7996012	9.62809	8.79589	-1.73679	0	ARL2BP	ADP-ribosylation factor-like 2 binding protein
8107673	7.27802	6.05217	-2.4331	0	GRAMD3	GRAM domain containing 3
8011875	8.47475	7.54024	-1.88452	0	DERL2	Der1-like domain family, member 2
7928630	9.10677	8.22945	-1.86156	0	EIF5AL1	eukaryotic translation initiation factor 5A-like 1
7917779	7.16416	5.92936	-2.52452	0	GCLM	glutamate-cysteine ligase, modifier subunit
8050071	7.93952	6.89703	-1.96371	0	ADI1	acireductone dioxygenase 1
7920123	11.0403	10.5202	-1.46534	0	S100A10	S100 calcium binding protein A10
7934101	6.50158	4.7148	-3.31479	0	AIFM2	apoptosis-inducing factor, mitochondrion-associated, 2
7974851	9.03761	8.11365	-1.86092	0	HIF1A	hypoxia inducible factor 1, alpha subunit (basic helix-loop-helix transcription factor)
8007885	8.19624	7.10353	-1.92292	0	NSF	N-ethylmaleimide-sensitive factor
8062852	7.2422	6.05389	-2.37896	0	PKIG	protein kinase (cAMP-dependent, catalytic) inhibitor gamma
8013776	7.91777	6.8909	-1.98164	0	C17orf63	chromosome 17 open reading frame 63
7929689	8.81934	7.88454	-1.85128	0	MARVELD1	MARVEL domain containing 1
8006820	10.3469	9.732	-1.53251	0	LASP1	LIM and SH3 protein 1
7976560	7.26142	6.11005	-2.33019	0	BDKRB2	bradykinin receptor B2
8106743	7.95153	10.0166	4.2099	1.64231e-123	VCAN	versican
8143144	7.13711	9.32532	5.06637	2.47054e-119	PTN	pleiotrophin
8148029	6.99986	9.12845	4.44827	5.17161e-92	COLEC10	collectin sub-family member 10 (C-type lectin)
8022927	7.05618	8.97715	3.86691	1.84604e-74	SLC39A6	solute carrier family 39 (zinc transporter), member 6
7971077	6.72256	8.77645	4.14448	2.44742e-73	POSTN	periostin, osteoblast specific factor
8035779	7.04249	8.83579	3.88674	2.8365e-70	ZNF253	zinc finger protein 253
8108370	6.1929	8.47418	4.53614	5.49926e-70	EGR1	early growth response 1
7904726	9.744	10.9822	2.36314	3.05796e-57	TXNIP	thioredoxin interacting protein
8029273	7.9847	9.39018	2.76964	6.21108e-55	MEGF8	multiple EGF-like-domains 8
8163637	7.44236	9.05954	3.01179	3.54804e-54	TNC	tenascin C
8150962	6.09199	8.0208	3.82149	1.55656e-52	TOX	thymocyte selection-associated high mobility group box
7972239	3.75229	8.60363	29.3592	3.28222e-52	SLITRK6	SLIT and NTRK-like family, member 6
7943160	7.50093	8.82637	2.88896	2.99586e-49	SCARNA9	small Cajal body-specific RNA 9
8059279	5.40306	7.72436	4.82966	7.97844e-46	EPHA4	EPH receptor A4
8030383	6.79567	8.45393	3.07341	5.05614e-45	RCN3	reticulocalbin 3, EF-hand calcium binding domain
8147864	7.19386	8.7689	2.84131	4.27668e-44	TTC35	tetratricopeptide repeat domain 35
8057803	5.98135	7.89786	3.79783	4.31121e-44	TMEFF2	transmembrane protein with EGF-like and two follistatin-like domains 2
7965423	7.70819	9.13421	2.58526	2.22128e-42	BTG1	B-cell translocation gene 1, anti-proliferative
8131666	4.17319	8.04027	14.8834	1.54215e-41	ITGB8	integrin, beta 8
8099524	6.01359	7.84388	3.51524	2.39118e-41	LDB2	LIM domain binding 2
7978570	7.56774	9.00465	2.60465	2.19228e-40	SNX6	sorting nexin 6
7907160	7.7045	9.05173	2.50677	1.42128e-39	ATP1B1	ATPase, Na+/K+ transporting, beta 1 polypeptide
7977507	10.8688	11.6787	1.75056	3.00036e-39	RPPH1	ribonuclease P RNA component H1
8117402	7.50205	8.84923	2.6064	4.8913e-39	HIST1H4E	histone cluster 1, H4e
8022674	7.61645	8.93289	2.53211	1.51852e-38	CDH2	cadherin 2, type 1, N-cadherin (neuronal)
8141950	7.48423	8.87967	2.57787	1.76708e-38	RELN	reelin
7912887	6.71031	8.26409	2.82775	3.28894e-36	MFAP2	microfibrillar-associated protein 2
7947248	5.05658	7.52226	5.45435	6.72402e-36	KIF18A	kinesin family member 18A
8098204	6.4861	8.04841	2.88057	2.25647e-35	CPE	carboxypeptidase E
8112327	6.77693	8.17261	2.8142	1.05674e-34	CKS1B	CDC28 protein kinase regulatory subunit 1B
8138745	5.33361	7.38123	4.48242	1.27059e-34	HOXA7	homeobox A7
8006123	7.46011	8.75108	2.47821	5.69656e-34	CPD	carboxypeptidase D
7958692	6.52171	7.87568	2.84911	1.05421e-33	TCTN1	tectonic family member 1
7981317	9.72346	10.7149	1.95809	2.61755e-33	---	---
8055952	4.79957	7.39032	5.87624	4.32734e-33	NR4A2	nuclear receptor subfamily 4, group A, member 2
8019709	8.71354	9.35069	2.18541	9.86005e-32	RNU2-1	RNA, U2 small nuclear 1
7969613	6.48396	7.95239	2.75394	1.57142e-31	GPC6	glypican 6
7908459	7.66509	8.86732	2.30901	1.11279e-30	CFH	complement factor H
8092654	6.54472	7.95633	2.6895	1.37909e-30	RPL39L	ribosomal protein L39-like
7926896	6.65346	7.99438	2.70021	3.24844e-30	CKS1B	CDC28 protein kinase regulatory subunit 1B
7983502	6.64422	7.98836	2.60832	1.59408e-29	PLDN	pallidin homolog (mouse)
8117382	6.95732	8.25047	2.47784	5.96877e-29	HIST1H2BD	histone cluster 1, H2bd
8056890	7.38739	8.63962	2.34936	6.44358e-29	CHN1	chimerin (chimaerin) 1
8035773	5.31032	7.24029	4.02678	1.16605e-28	ZNF506	zinc finger protein 506
8078270	9.11768	10.1179	2.13516	1.96578e-28	RPL15	ribosomal protein L15
8106479	6.56935	7.82026	2.6044	2.49679e-28	SCAMP1	secretory carrier membrane protein 1
8038949	6.14017	7.46175	2.87552	4.14662e-28	ZNF841	zinc finger protein 841
7951397	5.73723	7.32325	3.2827	6.97167e-28	CASP1	caspase 1, apoptosis-related cysteine peptidase (interleukin 1, beta, convertase)
8040103	5.97706	7.57038	3.00816	9.82354e-28	ID2	inhibitor of DNA binding 2, dominant negative helix-loop-helix protein
8107133	8.40438	9.42368	2.05686	2.59841e-26	PAM	peptidylglycine alpha-amidating monooxygenase
8083887	9.69272	10.5811	1.85946	5.00724e-26	CLDN11	claudin 11
8179041	9.93025	10.7452	1.76403	1.14077e-25	HLA-A	major histocompatibility complex, class I, A
8005134	6.24945	7.69096	2.6762	3.685e-25	ADORA2B	adenosine A2b receptor
8124911	9.34246	10.3481	1.96044	5.93393e-25	HLA-B	major histocompatibility complex, class I, B
8149555	6.26347	7.67677	2.53209	2.73378e-24	PSD3	pleckstrin and Sec7 domain containing 3
8142524	5.12641	7.08976	3.64845	2.77109e-24	TSPAN12	tetraspanin 12
7919193	7.72825	8.82601	2.10047	5.73714e-24	NUDT4P1	nudix (nucleoside diphosphate linked moiety X)-type motif 4 pseudogene 1
8160914	7.21502	8.39456	2.24351	6.22435e-24	VCP	valosin-containing protein
8007620	8.97267	10.0225	2.02182	6.77405e-24	GRN	granulin
8036602	7.4761	8.58656	2.1804	1.20647e-23	ECH1	enoyl CoA hydratase 1, peroxisomal
7977497	5.24408	7.12392	3.70159	1.22735e-23	CCNB1IP1	cyclin B1 interacting protein 1
8105991	5.95032	7.29202	2.79813	1.33482e-23	GUSBP3	glucuronidase, beta pseudogene 3
8112560	5.89419	7.28301	2.79719	1.50051e-23	GUSBP3	glucuronidase, beta pseudogene 3
8117377	7.07882	8.37474	2.2278	1.77395e-23	HIST1H1E	histone cluster 1, H1e
8098441	6.43214	7.71997	2.4737	2.32888e-23	ODZ3	odz, odd Oz/ten-m homolog 3 (Drosophila)
8131844	5.48686	7.11761	3.41216	5.31407e-23	GPNMB	glycoprotein (transmembrane) nmb
8106393	9.72396	10.5325	1.77944	7.05852e-23	F2R	coagulation factor II (thrombin) receptor
8178498	9.35565	10.3487	1.91354	8.565e-23	HLA-B	major histocompatibility complex, class I, B
7917088	6.3446	7.64882	2.4716	1.05019e-22	PIGK	phosphatidylinositol glycan anchor biosynthesis, class K
7908917	7.65674	8.67395	2.08413	2.26789e-22	BTG2	BTG family, member 2
8084213	8.89984	9.82101	1.97051	4.12754e-22	---	---
7960744	8.36628	9.37382	1.95508	4.16863e-22	C1R	complement component 1, r subcomponent
8046922	8.56614	9.49923	1.95208	4.59485e-22	COL3A1	collagen, type III, alpha 1
8104621	5.64553	7.10405	2.95534	5.21812e-22	GUSBP1	glucuronidase, beta pseudogene 1
8108631	7.35241	8.5516	2.11842	7.49182e-22	VTRNA1-3	vault RNA 1-3
7974870	7.12212	8.18709	2.20119	9.46261e-22	SNAPC1	small nuclear RNA activating complex, polypeptide 1, 43kDa
8018439	7.34246	8.33839	2.14348	1.0632e-21	H3F3B	H3 histone, family 3B (H3.3B)
7969003	8.74315	9.74822	1.9474	1.47589e-21	ITM2B	integral membrane protein 2B
7964460	6.04768	7.30939	2.60425	1.86308e-21	DDIT3	DNA-damage-inducible transcript 3
7915444	7.01872	8.17304	2.20598	2.02876e-21	LEPRE1	leucine proline-enriched proteoglycan (leprecan) 1
7981320	6.38642	7.53368	2.42012	2.40411e-21	---	---
7989347	6.33164	7.56769	2.47086	2.72234e-21	NARG2	NMDA receptor regulated 2
8058857	10.9777	11.5623	1.52744	2.91299e-21	IGFBP5	insulin-like growth factor binding protein 5
8179731	9.51714	10.411	1.82036	4.31363e-21	HLA-B	major histocompatibility complex, class I, B
8102720	7.06858	8.18312	2.18737	6.12942e-21	ANKRD50	ankyrin repeat domain 50
8019631	8.92841	9.42284	1.9219	7.65732e-21	RNU2-1	RNA, U2 small nuclear 1
8019633	8.92841	9.42284	1.9219	7.65732e-21	RNU2-1	RNA, U2 small nuclear 1
8019635	8.92841	9.42284	1.9219	7.65732e-21	RNU2-1	RNA, U2 small nuclear 1
8019637	8.92841	9.42284	1.9219	7.65732e-21	RNU2-1	RNA, U2 small nuclear 1
8019639	8.92841	9.42284	1.9219	7.65732e-21	RNU2-1	RNA, U2 small nuclear 1
8019641	8.92841	9.42284	1.9219	7.65732e-21	RNU2-1	RNA, U2 small nuclear 1
8019703	8.92841	9.42284	1.9219	7.65732e-21	RNU2-1	RNA, U2 small nuclear 1
8019705	8.92841	9.42284	1.9219	7.65732e-21	RNU2-1	RNA, U2 small nuclear 1
8019707	8.92841	9.42284	1.9219	7.65732e-21	RNU2-1	RNA, U2 small nuclear 1
8063078	10.0535	10.7547	1.64484	1.02021e-20	CTSA	cathepsin A
8179049	9.70919	10.4886	1.75033	1.34531e-20	HLA-J	major histocompatibility complex, class I, J (pseudogene)
8123767	8.92429	9.84414	1.92685	2.62902e-20	SSR1	signal sequence receptor, alpha
8117408	5.77987	7.26766	2.7833	3.57774e-20	HIST1H2AE	histone cluster 1, H2ae
8035813	4.68783	6.81853	4.61352	3.88508e-20	ZNF43	zinc finger protein 43
7972713	6.75321	7.90349	2.22618	5.01071e-20	EFNB2	ephrin-B2
8149551	4.46659	6.9294	6.14496	5.38487e-20	PSD3	pleckstrin and Sec7 domain containing 3
8107321	7.73852	8.778	1.99944	6.36447e-20	NCRNA00219	non-protein coding RNA 219
8025895	7.7134	8.6882	1.98624	1.40681e-19	PRKCSH	protein kinase C substrate 80K-H
8019802	8.69315	9.19757	1.8882	2.19288e-19	RNU2-1	RNA, U2 small nuclear 1
8047356	6.22081	7.45801	2.40944	2.45095e-19	NIF3L1	NIF3 NGG1 interacting factor 3-like 1 (S. pombe)
8140534	6.68267	7.86197	2.22207	4.01137e-19	SEMA3C	sema domain, immunoglobulin domain (Ig), short basic domain, secreted, (semaphorin) 3C
8107356	5.90337	7.31975	2.5624	1.85062e-18	DCP2	DCP2 decapping enzyme homolog (S. cerevisiae)
8117813	9.65552	10.3532	1.72822	2.45479e-18	HLA-J	major histocompatibility complex, class I, J (pseudogene)
8177669	5.6844	7.021	2.70898	3.71403e-18	GUSBP3	glucuronidase, beta pseudogene 3
7952408	6.0729	7.33636	2.43988	4.22125e-18	SIAE	sialic acid acetylesterase
7977288	8.16758	8.949	1.88215	4.43783e-18	SIVA1	SIVA1, apoptosis-inducing factor
8138289	5.15311	6.85662	3.43946	4.94732e-18	ETV1	ets variant 1
8001387	5.87637	7.23932	2.5658	5.86424e-18	SALL1	sal-like 1 (Drosophila)
8010354	5.09456	6.88152	3.48451	6.64553e-18	GAA	glucosidase, alpha; acid
8069574	5.35359	6.96719	2.99579	8.65233e-18	C21orf91	chromosome 21 open reading frame 91
8093494	7.02854	8.10941	2.06879	9.97839e-18	CRIPAK	cysteine-rich PAK1 inhibitor
7976795	8.40538	9.33522	1.83695	2.07157e-17	MEG3	maternally expressed 3 (non-protein coding)
7948606	10.6527	11.2727	1.51191	2.12233e-17	C11orf10	chromosome 11 open reading frame 10
8019074	5.0933	6.77425	3.4474	2.68417e-17	NPTX1	neuronal pentraxin I
8078962	7.58635	8.39683	1.93537	8.84202e-17	EIF1B	eukaryotic translation initiation factor 1B
8095751	3.23157	6.09981	8.03731	9.33834e-17	PARM1	prostate androgen-regulated mucin-like protein 1
7981181	6.25552	7.47042	2.21484	9.55663e-17	SCARNA13	small Cajal body-specific RNA 13
7964701	8.30257	9.1721	1.82482	1.00257e-16	GNS	glucosamine (N-acetyl)-6-sulfatase
8043820	8.11743	8.98678	1.83647	1.61399e-16	UNC50	unc-50 homolog (C. elegans)
8055913	7.63477	8.52791	1.90885	1.72089e-16	PRPF40A	PRP40 pre-mRNA processing factor 40 homolog A (S. cerevisiae)
7937335	5.40333	6.86745	2.88145	1.95555e-16	IFITM1	interferon induced transmembrane protein 1 (9-27)
7968015	6.02413	7.27092	2.373	2.14777e-16	TNFRSF19	tumor necrosis factor receptor superfamily, member 19
7899480	5.74912	7.15541	2.56893	2.31803e-16	SNORA73A	small nucleolar RNA, H/ACA box 73A
8121949	4.99627	6.74771	3.48055	2.63718e-16	LAMA2	laminin, alpha 2
7990211	8.07145	8.91296	1.83752	2.95933e-16	HEXA	hexosaminidase A (alpha polypeptide)
8178489	9.63244	10.367	1.67492	3.61074e-16	HLA-C	major histocompatibility complex, class I, C
7939329	7.08311	8.12394	2.00621	3.67501e-16	PDHX	pyruvate dehydrogenase complex, component X
7999834	9.85309	10.54	1.60671	4.26056e-16	ARL6IP1	ADP-ribosylation factor-like 6 interacting protein 1
8028791	9.06623	9.98353	1.8102	4.56755e-16	PLD3	phospholipase D family, member 3
7914202	5.67133	7.01661	2.60848	6.20656e-16	SNHG12	small nucleolar RNA host gene 12 (non-protein coding)
8134339	7.69406	8.57477	1.88396	7.31638e-16	PEG10	paternally expressed 10
8099073	7.92914	8.80045	1.83662	8.42e-16	LRPAP1	low density lipoprotein receptor-related protein associated protein 1
8038942	4.9814	6.74	3.40049	9.75996e-16	ZNF432	zinc finger protein 432
8031999	6.3157	7.45901	2.22221	1.22368e-15	PPAP2C	phosphatidic acid phosphatase type 2C
8001748	4.6173	6.81874	3.67734	1.60146e-15	SNORA50	small nucleolar RNA, H/ACA box 50
8027592	8.15309	8.9903	1.80442	1.91817e-15	LSM14A	LSM14A, SCD6 homolog A (S. cerevisiae)
8007919	6.38061	7.39534	2.17179	2.0807e-15	LRRC37A4	leucine rich repeat containing 37, member A4 (pseudogene)
7997904	7.19398	8.09761	1.9554	2.69381e-15	ZNF778	zinc finger protein 778
7934920	5.80014	7.1378	2.36025	2.79597e-15	LIPA	lipase A, lysosomal acid, cholesterol esterase
8124901	9.63759	10.374	1.6466	3.2927e-15	HLA-C	major histocompatibility complex, class I, C
8156164	4.72259	6.60376	3.52137	3.31726e-15	KIF27	kinesin family member 27
7900576	5.52514	6.97436	2.6287	4.32617e-15	PPIH	peptidylprolyl isomerase H (cyclophilin H)
8144812	7.14227	8.0456	1.9626	4.50682e-15	PCM1	pericentriolar material 1
8014956	5.91115	7.13973	2.37621	1.04694e-14	NR1D1	nuclear receptor subfamily 1, group D, member 1
8138912	5.93965	7.11383	2.31221	1.29993e-14	LSM5	LSM5 homolog, U6 small nuclear RNA associated (S. cerevisiae)
8016245	6.2569	7.28862	2.17946	1.43611e-14	LRRC37A4	leucine rich repeat containing 37, member A4 (pseudogene)
7915468	6.37666	7.53888	2.11112	1.45002e-14	CCDC23	coiled-coil domain containing 23
8174636	9.49201	10.1979	1.68377	1.55101e-14	SUMO2	SMT3 suppressor of mif two 3 homolog 2 (S. cerevisiae)
8098758	6.19082	7.28436	2.18279	2.14302e-14	ZNF721	zinc finger protein 721
8022612	5.914	7.10978	2.35909	2.77507e-14	ZNF521	zinc finger protein 521
7903032	5.58388	6.88807	2.51875	2.94081e-14	MTF2	metal response element binding transcription factor 2
7937763	7.34029	8.25065	1.89444	3.05642e-14	MRPL23	mitochondrial ribosomal protein L23
8000131	8.16306	8.94838	1.76769	3.06191e-14	NPIPL3	nuclear pore complex interacting protein-like 3
8150818	8.05627	8.78945	1.776	4.39896e-14	TCEA1	transcription elongation factor A (SII), 1
8102232	5.64566	6.90808	2.51806	4.54563e-14	LEF1	lymphoid enhancer-binding factor 1
7976073	5.79259	6.97377	2.39456	4.76889e-14	FLRT2	fibronectin leucine rich transmembrane protein 2
8004506	10.9139	11.3715	1.44104	4.96213e-14	SNORA48	small nucleolar RNA, H/ACA box 48
8006690	6.51793	7.56758	2.07027	5.29989e-14	AATF	apoptosis antagonizing transcription factor
8133106	6.64106	7.50667	2.02757	5.70259e-14	SNORA22	small nucleolar RNA, H/ACA box 22
8069933	5.32154	6.84626	2.74597	5.89178e-14	C21orf45	chromosome 21 open reading frame 45
8097973	4.30378	6.60129	4.31468	6.19521e-14	GUCY1B3	guanylate cyclase 1, soluble, beta 3
8088911	6.22417	7.29446	2.17362	7.26704e-14	ZNF717	zinc finger protein 717
8000676	8.15572	8.9372	1.75587	8.5323e-14	NPIPL3	nuclear pore complex interacting protein-like 3
8127563	9.4728	10.2113	1.66713	9.68357e-14	COL12A1	collagen, type XII, alpha 1
8063283	8.36648	9.13077	1.74075	1.07121e-13	CSE1L	CSE1 chromosome segregation 1-like (yeast)
7905088	6.96448	8.02601	1.91827	1.10658e-13	HIST2H2AC	histone cluster 2, H2ac
8000205	8.16689	8.94405	1.75014	1.28477e-13	NPIPL3	nuclear pore complex interacting protein-like 3
7918034	5.96666	6.99021	2.28811	1.34828e-13	DPH5	DPH5 homolog (S. cerevisiae)
8029958	7.51197	8.43542	1.83503	1.35939e-13	GLTSCR2	glioma tumor suppressor candidate region gene 2
7968703	4.85323	6.74693	3.11654	1.44912e-13	NHLRC3	NHL repeat containing 3
8078600	7.88089	8.64437	1.78201	1.56975e-13	TCEA1	transcription elongation factor A (SII), 1
8089714	5.68283	6.85047	2.51537	1.60179e-13	LSAMP	limbic system-associated membrane protein
8177732	8.9413	9.83683	1.74058	1.8002e-13	HLA-A	major histocompatibility complex, class I, A
8031152	10.9021	11.3914	1.42609	1.95278e-13	RPS9	ribosomal protein S9
7945740	9.18905	9.94803	1.7258	2.00389e-13	RPL26L1	ribosomal protein L26-like 1
7994026	8.1024	8.8852	1.74849	2.31996e-13	NPIPL3	nuclear pore complex interacting protein-like 3
8022283	3.93874	6.4564	5.78922	2.77903e-13	FAM38B	family with sequence similarity 38, member B
8133662	8.73759	9.58341	1.72887	2.80157e-13	RHBDD2	rhomboid domain containing 2
8026051	5.88143	7.08886	2.26961	2.86452e-13	RNASEH2A	ribonuclease H2, subunit A
8017704	5.56113	6.86235	2.46996	3.02257e-13	AMZ2P1	archaelysin family metallopeptidase 2 pseudogene 1
7990165	5.24026	6.68386	2.85525	3.19916e-13	PARP6	poly (ADP-ribose) polymerase family, member 6
8027260	5.17566	6.58945	3.04722	3.71189e-13	ZNF486	zinc finger protein 486
8057506	3.19976	5.8322	6.69409	4.7498e-13	FRZB	frizzled-related protein
7977803	6.13927	7.23436	2.15696	5.05001e-13	RBM23	RNA binding motif protein 23
7997504	7.18098	8.13377	1.87001	6.53171e-13	CDH13	cadherin 13, H-cadherin (heart)
8078008	8.4095	9.16875	1.71651	6.69999e-13	LSM3	LSM3 homolog, U6 small nuclear RNA associated (S. cerevisiae)
8135688	7.39003	8.30656	1.82447	9.96998e-13	NAA38	N(alpha)-acetyltransferase 38, NatC auxiliary subunit
8169740	10.2084	10.7948	1.47741	1.01553e-12	H3F3A	H3 histone, family 3A
8177725	8.65428	9.46203	1.70995	1.03961e-12	HLA-G	major histocompatibility complex, class I, G
8179034	8.65428	9.46203	1.70995	1.03961e-12	HLA-G	major histocompatibility complex, class I, G
7994161	6.05822	7.08824	2.23199	1.26389e-12	RBBP6	retinoblastoma binding protein 6
8130867	6.1348	7.23863	2.1319	1.29496e-12	THBS2	thrombospondin 2
8058147	6.79294	7.7382	1.94317	1.42427e-12	PPIL3	peptidylprolyl isomerase (cyclophilin)-like 3
8084794	5.3655	6.87239	2.56068	1.62409e-12	IL1RAP	interleukin 1 receptor accessory protein
8069340	6.2736	7.26937	2.07855	1.6442e-12	C21orf57	chromosome 21 open reading frame 57
8124756	7.37201	8.23219	1.82904	1.67694e-12	PPP1R10	protein phosphatase 1, regulatory (inhibitor) subunit 10
8178358	7.37201	8.23219	1.82904	1.67694e-12	PPP1R10	protein phosphatase 1, regulatory (inhibitor) subunit 10
8179664	7.37201	8.23219	1.82904	1.67694e-12	PPP1R10	protein phosphatase 1, regulatory (inhibitor) subunit 10
8154733	9.42251	8.67202	-1.7643	1.80123e-12	ACO1	aconitase 1, soluble
8068083	7.05163	5.70857	-2.59915	1.80123e-12	C21orf7	chromosome 21 open reading frame 7
8015349	6.46728	4.90628	-3.27152	1.80123e-12	KRT19	keratin 19
7965812	7.71141	6.75963	-2.00992	1.80123e-12	GNPTAB	N-acetylglucosamine-1-phosphate transferase, alpha and beta subunits
7912198	10.5226	9.95598	-1.50393	1.80123e-12	ENO1	enolase 1, (alpha)
8056545	7.99363	7.08148	-1.91869	1.80123e-12	STK39	serine threonine kinase 39 (STE20/SPS1 homolog, yeast)
7961399	6.55643	5.10528	-3.07172	1.80123e-12	GSG1	germ cell associated 1
8074261	7.51262	6.51577	-2.08035	1.80123e-12	BID	BH3 interacting domain death agonist
8053036	6.56693	7.51391	2.0019	1.8237e-12	TPRKB	TP53RK binding protein
8018315	9.45937	10.1301	1.63911	1.84179e-12	SUMO2	SMT3 suppressor of mif two 3 homolog 2 (S. cerevisiae)
7944867	6.44608	7.58501	2.00126	1.90763e-12	SIAE	sialic acid acetylesterase
8102792	8.51796	9.27613	1.70137	2.01234e-12	PCDH18	protocadherin 18
8144758	7.78865	8.61224	1.7583	2.18773e-12	ZDHHC2	zinc finger, DHHC-type containing 2
8112558	6.47055	7.46979	2.01121	2.3427e-12	GUSBL1	glucuronidase, beta-like 1
8069644	9.81845	10.4382	1.54736	2.50495e-12	APP	amyloid beta (A4) precursor protein
7946516	6.55871	7.5205	1.97892	2.51804e-12	SBF2	SET binding factor 2
8019885	6.69711	7.75405	1.9267	2.53641e-12	SMCHD1	structural maintenance of chromosomes flexible hinge domain containing 1
8096675	5.98448	7.11395	2.15748	2.68177e-12	TET2	tet oncogene family member 2
8091354	5.67771	6.94882	2.34997	2.77075e-12	HLTF	helicase-like transcription factor
8127743	7.34214	8.22185	1.81917	2.84958e-12	HMGN3	high mobility group nucleosomal binding domain 3
8027002	6.85227	7.77594	1.90793	3.02616e-12	GDF15	growth differentiation factor 15
8170420	5.63677	6.86298	2.39808	3.04486e-12	MAMLD1	mastermind-like domain containing 1
7987165	7.29239	6.10338	-2.2576	3.60245e-12	AVEN	apoptosis, caspase activation inhibitor
8076128	7.69608	6.75351	-1.964	3.60245e-12	JOSD1	Josephin domain containing 1
8163948	7.91468	6.91057	-1.93881	3.60245e-12	RBM18	RNA binding motif protein 18
8157233	6.83597	5.32066	-2.76585	3.60245e-12	HSDL2	hydroxysteroid dehydrogenase like 2
7946142	9.6073	8.87895	-1.70255	3.60245e-12	PRKCDBP	protein kinase C, delta binding protein
8004030	7.08814	7.92872	1.87249	4.02078e-12	RNF167	ring finger protein 167
7936494	5.23076	6.71144	2.73331	4.27892e-12	GFRA1	GDNF family receptor alpha 1
8114185	6.28244	7.32078	2.07308	5.06927e-12	CDKN2AIPNL	CDKN2A interacting protein N-terminal like
7952869	5.96311	7.07574	2.20667	5.36496e-12	THYN1	thymocyte nuclear protein 1
8045425	7.20566	6.01573	-2.2793	5.40368e-12	R3HDM1	R3H domain containing 1
8113591	7.56195	6.60265	-2.01302	5.40368e-12	PGGT1B	protein geranylgeranyltransferase type I, beta subunit
8111129	7.85584	7.00231	-1.93691	5.40368e-12	ZNF622	zinc finger protein 622
8037322	8.40784	7.57605	-1.82592	5.40368e-12	ETHE1	ethylmalonic encephalopathy 1
7915870	7.04143	7.91997	1.87109	5.72344e-12	ATPAF1	ATP synthase mitochondrial F1 complex assembly factor 1
8000638	7.35349	8.19094	1.80147	5.94964e-12	SMG1	SMG1 homolog, phosphatidylinositol 3-kinase-related kinase (C. elegans)
7980547	6.60516	7.64791	1.95539	6.17743e-12	SEL1L	sel-1 suppressor of lin-12-like (C. elegans)
8125125	6.99818	7.86196	1.87571	6.35661e-12	LSM2	LSM2 homolog, U6 small nuclear RNA associated (S. cerevisiae)
8178641	6.99818	7.86196	1.87571	6.35661e-12	LSM2	LSM2 homolog, U6 small nuclear RNA associated (S. cerevisiae)
8179839	6.99818	7.86196	1.87571	6.35661e-12	LSM2	LSM2 homolog, U6 small nuclear RNA associated (S. cerevisiae)
8131539	6.95308	7.95631	1.87634	7.01085e-12	TMEM106B	transmembrane protein 106B
7932678	9.38231	8.4971	-1.76223	7.2049e-12	YME1L1	YME1-like 1 (S. cerevisiae)
8169272	5.76437	3.85277	-3.61007	7.2049e-12	ATG4A	ATG4 autophagy related 4 homolog A (S. cerevisiae)
8107375	5.67727	6.86713	2.35604	7.39756e-12	YTHDC2	YTH domain containing 2
8178322	9.29562	9.98955	1.6583	8.33859e-12	SUMO2	SMT3 suppressor of mif two 3 homolog 2 (S. cerevisiae)
8025601	7.0555	5.76537	-2.44818	9.00613e-12	ICAM1	intercellular adhesion molecule 1
8166632	6.9828	5.76185	-2.54354	9.00613e-12	GK	glycerol kinase
7928600	9.10888	8.276	-1.80441	9.00613e-12	EIF5AL1	eukaryotic translation initiation factor 5A-like 1
8150714	6.31771	7.33714	2.03377	1.0023e-11	PCMTD1	protein-L-isoaspartate (D-aspartate) O-methyltransferase domain containing 1
7938295	5.54636	6.76097	2.50285	1.01151e-11	RPL27A	ribosomal protein L27a
8090433	8.31307	7.48208	-1.82293	1.08074e-11	MGLL	monoglyceride lipase
7928444	8.85328	7.96157	-1.80427	1.08074e-11	VCL	vinculin
8065762	6.99245	7.95065	1.85305	1.1473e-11	PIGU	phosphatidylinositol glycan anchor biosynthesis, class U
8091103	6.51409	7.5464	1.96421	1.14858e-11	TFDP2	transcription factor Dp-2 (E2F dimerization partner 2)
8081115	5.83129	6.8625	2.28758	1.16954e-11	ARL13B	ADP-ribosylation factor-like 13B
8107632	6.60459	4.97926	-3.00308	1.26086e-11	SNX24	sorting nexin 24
7972190	6.90919	7.68764	1.88493	1.45463e-11	RBM26	RNA binding motif protein 26
7931293	6.96257	7.86718	1.85669	1.46423e-11	DOCK1	dedicator of cytokinesis 1
8005097	5.4288	6.75123	2.46591	1.62606e-11	HS3ST3B1	heparan sulfate (glucosamine) 3-O-sulfotransferase 3B1
8140739	6.80593	7.67449	1.90302	1.71195e-11	TP53TG1	TP53 target 1 (non-protein coding)
7917850	7.70588	6.74931	-1.95415	1.80123e-11	ARHGAP29	Rho GTPase activating protein 29
8105436	5.22066	6.65523	2.65243	1.80541e-11	MAP3K1	mitogen-activated protein kinase kinase kinase 1
8126259	6.48854	7.46939	1.95699	1.82357e-11	C6orf130	chromosome 6 open reading frame 130
8104944	6.06972	7.15563	2.08176	2.0229e-11	NIPBL	Nipped-B homolog (Drosophila)
8089015	5.45384	6.79417	2.40816	2.03428e-11	PROS1	protein S (alpha)
8000823	7.13032	7.97822	1.81531	2.10909e-11	SMG1	SMG1 homolog, phosphatidylinositol 3-kinase-related kinase (C. elegans)
8062981	8.89891	9.71195	1.67867	2.31965e-11	PIGT	phosphatidylinositol glycan anchor biosynthesis, class T
7938390	7.74723	6.83112	-1.93124	2.34159e-11	ADM	adrenomedullin
8069676	8.51253	7.69184	-1.79168	2.34159e-11	ADAMTS1	ADAM metallopeptidase with thrombospondin type 1 motif, 1
7991837	8.68681	7.95458	-1.78747	2.52172e-11	NME4	non-metastatic cells 4, protein expressed in
8023528	6.71038	5.22626	-2.8127	2.52172e-11	ALPK2	alpha-kinase 2
8111387	7.35145	6.29308	-2.09603	2.70184e-11	ADAMTS12	ADAM metallopeptidase with thrombospondin type 1 motif, 12
8076998	7.96407	8.69624	1.70272	2.72973e-11	PLXNB2	plexin B2
8019250	9.64459	8.94431	-1.66039	2.88196e-11	P4HB	prolyl 4-hydroxylase, beta polypeptide
8100714	6.24985	7.3093	2.02295	3.02472e-11	YTHDC1	YTH domain containing 1
8027368	5.46881	6.64305	2.40777	3.29704e-11	ZNF254	zinc finger protein 254
8145793	9.87386	10.4774	1.50413	3.42154e-11	SNORD13	small nucleolar RNA, C/D box 13
8055978	7.93319	8.65797	1.70387	3.49406e-11	FAM133B	family with sequence similarity 133, member B
8132929	6.77557	5.27231	-2.79835	3.60245e-11	GBAS	glioblastoma amplified sequence
7951408	6.53903	7.40255	1.95238	3.6632e-11	CARD16	caspase recruitment domain family, member 16
7958600	8.01538	7.10848	-1.85421	3.78257e-11	ANKRD13A	ankyrin repeat domain 13A
8160722	8.02236	7.20069	-1.8436	4.14282e-11	UBAP2	ubiquitin associated protein 2
7943158	4.15076	6.10396	4.35279	4.2496e-11	SCARNA9	small Cajal body-specific RNA 9
8178476	8.6097	9.31545	1.66296	4.38832e-11	BAT1	HLA-B associated transcript 1
8000156	7.09642	7.92385	1.81286	4.50155e-11	SMG1	SMG1 homolog, phosphatidylinositol 3-kinase-related kinase (C. elegans)
7949650	4.38767	6.34134	3.65822	4.6572e-11	CTSF	cathepsin F
8115234	8.80186	7.9868	-1.77781	4.86331e-11	ANXA6	annexin A6
8013109	7.0571	7.93977	1.81833	5.19948e-11	---	---
8135514	6.53901	7.4973	1.93619	5.26122e-11	IFRD1	interferon-related developmental regulator 1
8018082	6.49935	4.99903	-2.97449	5.40368e-11	SLC39A11	solute carrier family 39 (metal ion transporter), member 11
7963313	5.94055	4.25805	-3.35936	5.76392e-11	GALNT6	UDP-N-acetyl-alpha-D-galactosamine:polypeptide N-acetylgalactosaminyltransferase 6 (GalNAc-T6)
8157487	9.06461	8.33527	-1.7743	5.76392e-11	PAPPA	pregnancy-associated plasma protein A, pappalysin 1
8172280	7.51682	6.4914	-1.99612	6.48441e-11	SLC9A7	solute carrier family 9 (sodium/hydrogen exchanger), member 7
7911529	9.13249	8.44687	-1.76872	6.66454e-11	MXRA8	matrix-remodelling associated 8
8084219	5.04252	6.55629	2.94961	6.99079e-11	KLHL24	kelch-like 24 (Drosophila)
8179750	9.02213	9.72704	1.66435	6.99276e-11	BAT1	HLA-B associated transcript 1
8007100	10.9128	10.4195	-1.43407	7.38503e-11	IGFBP4	insulin-like growth factor binding protein 4
7920128	11.4212	10.91	-1.39555	7.74527e-11	S100A11	S100 calcium binding protein A11
8120428	10.2074	9.68627	-1.50584	8.46576e-11	FKBP1A	FK506 binding protein 1A, 12kDa
8107942	6.93522	7.84133	1.83687	8.62373e-11	RAD50	RAD50 homolog (S. cerevisiae)
7909400	8.93225	9.59126	1.65993	9.62903e-11	CD46	CD46 molecule, complement regulatory protein
8083850	5.23476	6.54565	2.58153	9.6648e-11	---	---
8167897	5.47867	6.75592	2.39211	9.99282e-11	RRAGB	Ras-related GTP binding B
7910752	5.20382	6.57317	2.69869	1.02139e-10	MTR	5-methyltetrahydrofolate-homocysteine methyltransferase
8046861	8.41745	7.67148	-1.77148	1.04471e-10	ITGAV	integrin, alpha V (vitronectin receptor, alpha polypeptide, antigen CD51)
7918426	7.79873	6.84217	-1.87847	1.11676e-10	SLC16A4	solute carrier family 16, member 4 (monocarboxylic acid transporter 5)
8058869	7.0878	5.90034	-2.27873	1.13477e-10	TNS1	tensin 1
8077458	5.37618	6.61008	2.44639	1.14973e-10	EDEM1	ER degradation enhancer, mannosidase alpha-like 1
8000636	6.08671	7.07717	2.06419	1.14986e-10	NPIPL3	nuclear pore complex interacting protein-like 3
8101762	6.02618	7.07457	2.08842	1.15452e-10	SNCA	synuclein, alpha (non A4 component of amyloid precursor)
7954245	5.8728	6.93545	2.15727	1.21347e-10	PLEKHA5	pleckstrin homology domain containing, family A member 5
7920291	8.60545	7.78661	-1.75538	1.44098e-10	S100A16	S100 calcium binding protein A16
8141228	7.31016	6.15402	-2.0993	1.51303e-10	TMEM130	transmembrane protein 130
7954090	7.38954	6.39354	-2.03879	1.72918e-10	EMP1	epithelial membrane protein 1
8017312	7.77238	8.53762	1.69876	1.77695e-10	MED13	mediator complex subunit 13
8116297	8.30952	9.04308	1.64949	1.77719e-10	HNRNPH1	heterogeneous nuclear ribonucleoprotein H1 (H)
8067839	8.24328	7.36957	-1.77909	1.96334e-10	KGFLP1	keratinocyte growth factor-like protein 1
8047538	7.92256	7.07583	-1.83993	1.98135e-10	BMPR2	bone morphogenetic protein receptor, type II (serine/threonine kinase)
8048995	8.2987	9.0958	1.64597	1.99872e-10	ITM2C	integral membrane protein 2C
7951807	7.86677	8.62354	1.68123	2.16759e-10	CADM1	cell adhesion molecule 1
8027778	9.59537	8.93393	-1.63265	2.1975e-10	FXYD5	FXYD domain containing ion transport regulator 5
8105504	7.56995	8.25904	1.72767	2.2599e-10	FAM133B	family with sequence similarity 133, member B
7925062	5.49573	6.77457	2.34371	2.3836e-10	SIPA1L2	signal-induced proliferation-associated 1 like 2
7922137	6.47093	7.41813	1.92623	2.39827e-10	NME7	non-metastatic cells 7, protein expressed in (nucleoside-diphosphate kinase)
7923119	6.49602	7.42463	1.92757	2.4228e-10	ZBTB41	zinc finger and BTB domain containing 41
8091422	8.52278	7.66098	-1.74689	2.44967e-10	WWTR1	WW domain containing transcription regulator 1
8162533	5.46609	6.67815	2.34945	2.45402e-10	PTCH1	patched homolog 1 (Drosophila)
8147172	7.97643	7.06905	-1.82869	2.48569e-10	CPNE3	copine III
8045247	8.60067	7.77051	-1.74608	2.59377e-10	PLEKHB2	pleckstrin homology domain containing, family B (evectins) member 2
8089544	10.8691	10.3782	-1.42493	2.59377e-10	CCDC80	coiled-coil domain containing 80
8145954	8.15157	7.32165	-1.79124	2.6478e-10	TACC1	transforming, acidic coiled-coil containing protein 1
8163185	10.6821	10.1437	-1.4432	2.70184e-10	TXN	thioredoxin
8121734	7.22648	7.95373	1.77538	2.71895e-10	ASF1A	ASF1 anti-silencing function 1 homolog A (S. cerevisiae)
7985089	8.09811	8.80354	1.65443	2.83529e-10	RCN2	reticulocalbin 2, EF-hand calcium binding domain
8141843	4.85187	6.50751	2.89851	2.9379e-10	RASA4	RAS p21 protein activator 4
8139488	9.75867	10.3272	1.51282	2.99649e-10	IGFBP3	insulin-like growth factor binding protein 3
8066051	8.17865	7.38179	-1.78651	3.15215e-10	NDRG3	NDRG family member 3
8034565	6.2209	7.21745	1.98431	3.256e-10	DNASE2	deoxyribonuclease II, lysosomal
7963750	8.1439	8.82416	1.64708	3.48155e-10	CBX5	chromobox homolog 5 (HP1 alpha homolog, Drosophila)
8117800	9.01606	9.85084	1.64067	3.48952e-10	HLA-A	major histocompatibility complex, class I, A
7954653	4.52101	6.35615	3.52329	3.53877e-10	TSPAN11	tetraspanin 11
8157650	8.26115	7.4962	-1.75587	3.71053e-10	PTGS1	prostaglandin-endoperoxide synthase 1 (prostaglandin G/H synthase and cyclooxygenase)
8122705	8.10341	7.15123	-1.78914	3.83661e-10	PCMT1	protein-L-isoaspartate (D-aspartate) O-methyltransferase
7987145	7.28548	6.16703	-2.0603	3.89065e-10	FMN1	formin 1
8127987	5.23238	6.68841	2.51434	4.04663e-10	SNORD50A	small nucleolar RNA, C/D box 50A
8015214	7.19956	6.17951	-2.12527	4.5571e-10	KRTAP2-4	keratin associated protein 2-4
8019574	7.19956	6.17951	-2.12527	4.5571e-10	KRTAP2-4	keratin associated protein 2-4
8038078	10.0625	10.5917	1.44751	4.70639e-10	KDELR1	KDEL (Lys-Asp-Glu-Leu) endoplasmic reticulum protein retention receptor 1
7916808	6.84408	5.48236	-2.49603	4.80927e-10	SLC35D1	solute carrier family 35 (UDP-glucuronic acid/UDP-N-acetylgalactosamine dual transporter), member D1
8120992	5.40916	6.63105	2.43487	4.86148e-10	ZNF292	zinc finger protein 292
8101945	9.16873	9.88291	1.6255	5.14762e-10	H2AFZ	H2A histone family, member Z
7904137	7.87022	7.02275	-1.83288	5.45771e-10	HIPK1	homeodomain interacting protein kinase 1
8070182	7.69044	6.79464	-1.86452	5.49374e-10	RCAN1	regulator of calcineurin 1
8023415	6.00558	6.92591	2.09828	6.15782e-10	TCF4	transcription factor 4
8002347	7.45175	8.27855	1.7179	6.31264e-10	AARS	alanyl-tRNA synthetase
8120441	6.99043	7.84097	1.79649	6.45939e-10	PHF3	PHD finger protein 3
8178977	7.96612	8.63497	1.66172	6.55488e-10	TAPBP	TAP binding protein (tapasin)
8089930	7.75561	8.49363	1.67965	6.57156e-10	GOLGB1	golgin B1
7934733	8.09695	7.31938	-1.77563	7.52912e-10	ANXA11	annexin A11
8096463	6.89117	7.63848	1.80497	7.53573e-10	SMARCAD1	SWI/SNF-related, matrix-associated actin-dependent regulator of chromatin, subfamily a, containing DEAD/H box 1
7947490	6.14112	7.10862	1.99844	7.63609e-10	APIP	APAF1 interacting protein
8111677	7.29836	6.42299	-2.03236	7.65521e-10	LIFR	leukemia inhibitory factor receptor alpha
8000263	6.11466	7.08965	2.01735	8.05552e-10	COG7	component of oligomeric golgi complex 7
7942123	10.4762	9.91178	-1.45003	8.2316e-10	CCND1	cyclin D1
7979916	7.58625	6.86197	-1.86987	8.69992e-10	SYNJ2BP	synaptojanin 2 binding protein
8078330	6.82792	7.64152	1.82522	8.7378e-10	RBMS3	RNA binding motif, single stranded interacting protein 3
8130438	5.5359	6.65537	2.36339	9.23958e-10	TFB1M	transcription factor B1, mitochondrial
8092055	5.16247	6.52698	2.52727	9.41038e-10	SLC7A14	solute carrier family 7 (cationic amino acid transporter, y+ system), member 14
8006984	8.7782	8.01189	-1.72413	9.60053e-10	PSMD3	proteasome (prosome, macropain) 26S subunit, non-ATPase, 3
8036324	6.7003	7.51676	1.85681	1.04329e-09	ZNF260	zinc finger protein 260
8158317	8.46595	7.65409	-1.72344	1.06633e-09	SPTAN1	spectrin, alpha, non-erythrocytic 1 (alpha-fodrin)
7971550	6.90386	7.68631	1.79772	1.07707e-09	MED4	mediator complex subunit 4
7971620	7.67422	6.87027	-1.8522	1.08434e-09	KPNA3	karyopherin alpha 3 (importin alpha 4)
8180166	8.08656	8.78249	1.6401	1.14951e-09	TAPBP	TAP binding protein (tapasin)
8025918	8.27074	7.51085	-1.73806	1.21403e-09	CNN1	calponin 1, basic, smooth muscle
8073775	7.23348	8.00353	1.74268	1.39983e-09	FBLN1	fibulin 1
8178090	10.2393	10.7451	1.41591	1.40194e-09	C6orf48	chromosome 6 open reading frame 48
8179326	10.2393	10.7451	1.41591	1.40194e-09	C6orf48	chromosome 6 open reading frame 48
8048234	10.3428	9.85634	-1.45652	1.40496e-09	ARPC2	actin related protein 2/3 complex, subunit 2, 34kDa
7948274	7.6467	6.71495	-1.87439	1.52384e-09	UBE2L6	ubiquitin-conjugating enzyme E2L 6
8120043	5.3712	6.63996	2.37754	1.54821e-09	RUNX2	runt-related transcription factor 2
7960320	6.57823	7.53178	1.84841	1.60894e-09	DCP1B	DCP1 decapping enzyme homolog B (S. cerevisiae)
8016739	8.38771	7.60021	-1.71863	1.78682e-09	TOB1	transducer of ERBB2, 1
7954104	7.11994	7.95648	1.74867	1.818e-09	ATF7IP	activating transcription factor 7 interacting protein
7979133	9.81964	9.17272	-1.55681	1.93091e-09	NID2	nidogen 2 (osteonidogen)
8042843	5.61353	6.68941	2.29978	1.95653e-09	WDR54	WD repeat domain 54
8018975	6.43438	7.31101	1.89658	2.12692e-09	LGALS3BP	lectin, galactoside-binding, soluble, 3 binding protein
8088958	8.31348	7.50011	-1.7241	2.23712e-09	GBE1	glucan (1,4-alpha-), branching enzyme 1
8036276	7.80263	8.50722	1.65559	2.28357e-09	POLR2I	polymerase (RNA) II (DNA directed) polypeptide I, 14.5kDa
8026780	7.75508	8.38498	1.67305	2.3116e-09	PGLS	6-phosphogluconolactonase
7925531	6.8079	7.45807	1.80949	2.4756e-09	AKT3	v-akt murine thymoma viral oncogene homolog 3 (protein kinase B, gamma)
7914467	7.0465	6.00485	-2.17143	2.47849e-09	SPOCD1	SPOC domain containing 1
8176026	8.91199	8.16365	-1.71081	2.74327e-09	FLNA	filamin A, alpha
8149733	7.39502	8.18759	1.70086	2.8829e-09	TNFRSF10B	tumor necrosis factor receptor superfamily, member 10b
7941104	8.25731	9.0004	1.61446	2.92644e-09	ARL2	ADP-ribosylation factor-like 2
7945781	7.74756	6.83935	-1.82902	2.97743e-09	PHLDA2	pleckstrin homology-like domain, family A, member 2
7947681	9.30233	8.57014	-1.67878	3.235e-09	ARHGAP1	Rho GTPase activating protein 1
8046906	5.66595	6.84269	2.15826	3.28644e-09	GULP1	GULP, engulfment adaptor PTB domain containing 1
7993580	7.19395	7.94399	1.73962	3.55644e-09	NPIP	nuclear pore complex interacting protein
8075910	6.80261	5.61645	-2.4101	3.57543e-09	RAC2	ras-related C3 botulinum toxin substrate 2 (rho family, small GTP binding protein Rac2)
8123494	7.31997	6.25695	-1.98211	3.58804e-09	FAM120B	family with sequence similarity 120B
7983734	6.63852	5.02305	-2.62049	3.69251e-09	TMOD2	tropomodulin 2 (neuronal)
8116070	7.61091	6.72547	-1.85345	3.76276e-09	PDLIM7	PDZ and LIM domain 7 (enigma)
8133860	6.84902	7.63859	1.78738	3.86908e-09	GNAI1	guanine nucleotide binding protein (G protein), alpha inhibiting activity polypeptide 1
8142415	6.23777	7.19863	1.92558	3.91432e-09	C7orf60	chromosome 7 open reading frame 60
8102141	6.05921	6.9256	1.98891	3.92056e-09	PPA2	pyrophosphatase (inorganic) 2
8005707	7.75105	6.94477	-1.81421	3.94288e-09	MAP2K3	mitogen-activated protein kinase kinase 3
8020220	9.28148	8.65098	-1.65893	3.99692e-09	TUBB6	tubulin, beta 6
7955450	6.59997	7.47049	1.8418	4.05524e-09	LETMD1	LETM1 domain containing 1
7917516	8.58015	7.80276	-1.69486	4.1194e-09	GBP1	guanylate binding protein 1, interferon-inducible, 67kDa
7962367	8.30575	8.9668	1.60866	4.1612e-09	ZCRB1	zinc finger CCHC-type and RNA binding motif 1
8012469	10.4911	10.8263	1.38995	4.24241e-09	RPL26	ribosomal protein L26
7994609	7.72552	6.81941	-1.81089	4.62195e-09	QPRT	quinolinate phosphoribosyltransferase
7950005	6.81929	5.56579	-2.28811	4.73903e-09	MRGPRF	MAS-related GPR, member F
7905428	7.0245	5.81214	-2.16491	4.76965e-09	TUFT1	tuftelin 1
7928800	7.83509	7.00522	-1.79027	4.8417e-09	FAM190B	family with sequence similarity 190, member B
7961532	5.8861	4.07562	-3.12342	4.8453e-09	ARHGDIB	Rho GDP dissociation inhibitor (GDI) beta
8008263	7.61375	8.41055	1.66483	4.93039e-09	PDK2	pyruvate dehydrogenase kinase, isozyme 2
8092201	7.71052	6.86547	-1.81859	5.06685e-09	TBL1XR1	transducin (beta)-like 1 X-linked receptor 1
7932826	7.24441	6.27646	-1.99085	5.27939e-09	KIAA1462	KIAA1462
8170882	8.3125	9.02665	1.60228	5.73939e-09	ATP6AP1	ATPase, H+ transporting, lysosomal accessory protein 1
8107100	8.30256	7.50904	-1.70376	5.95125e-09	RGMB	RGM domain family, member B
8105995	6.45433	7.37996	1.86084	6.1266e-09	SMA5	glucuronidase, beta pseudogene
7933947	8.44312	7.65984	-1.69355	6.18181e-09	HERC4	hect domain and RLD 4
8073799	8.57718	7.8906	-1.68611	6.66454e-09	ATXN10	ataxin 10
8088919	7.59507	6.6975	-1.83511	7.06621e-09	ROBO1	roundabout, axon guidance receptor, homolog 1 (Drosophila)
8173607	5.69872	6.76845	2.10931	7.71875e-09	---	---
8127549	7.44	8.20446	1.68136	7.82065e-09	SLC17A5	solute carrier family 17 (anion/sugar transporter), member 5
7914282	6.53852	5.15417	-2.6073	7.9362e-09	SDC3	syndecan 3
7933164	6.78274	5.51342	-2.37635	8.04067e-09	HNRNPF	heterogeneous nuclear ribonucleoprotein F
8139840	5.02755	6.3124	2.47619	8.90229e-09	ERV3	endogenous retroviral sequence 3 (includes zinc finger protein H-plk/HPF9)
7945663	4.91578	6.26736	2.82365	9.1141e-09	LOC402778	CD225 family protein FLJ76511
7984364	8.99102	8.22362	-1.68993	9.11961e-09	SMAD3	SMAD family member 3
7903389	6.28455	7.21521	1.88115	9.43111e-09	---	---
7994659	7.62433	6.82768	-1.83265	9.45283e-09	MVP	major vault protein
8140037	7.4896	8.26748	1.66789	9.59231e-09	BAZ1B	bromodomain adjacent to zinc finger domain, 1B
8005471	11.8941	11.4838	-1.34839	9.65997e-09	RPS28	ribosomal protein S28
8009761	6.53099	7.35277	1.83547	9.95726e-09	NUP85	nucleoporin 85kDa
7965979	7.08656	5.99426	-2.10394	1.07101e-08	ALDH1L2	aldehyde dehydrogenase 1 family, member L2
8147461	7.8687	8.56877	1.62777	1.07548e-08	SDC2	syndecan 2
8005847	8.2951	7.56015	-1.69494	1.08056e-08	TNFAIP1	tumor necrosis factor, alpha-induced protein 1 (endothelial)
7930422	6.92356	7.72638	1.76365	1.08089e-08	SMC3	structural maintenance of chromosomes 3
7970370	8.2197	8.90312	1.59807	1.10456e-08	UPF3A	UPF3 regulator of nonsense transcripts homolog A (yeast)
7999553	6.80532	5.64459	-2.30227	1.12e-08	CPPED1	calcineurin-like phosphoesterase domain containing 1
8116859	8.75712	9.5025	1.59407	1.15902e-08	TMEM14C	transmembrane protein 14C
7956819	6.56843	5.40623	-2.49496	1.16359e-08	RASSF3	Ras association (RalGDS/AF-6) domain family member 3
7899703	7.88176	7.20055	-1.74843	1.16647e-08	TXLNA	taxilin alpha
8124926	8.53345	9.2022	1.59013	1.1721e-08	BAT1	HLA-B associated transcript 1
7984330	5.09177	6.39125	2.63346	1.19267e-08	ZWILCH	Zwilch, kinetochore associated, homolog (Drosophila)
8022996	7.75077	6.87873	-1.7945	1.25203e-08	KIAA1632	KIAA1632
8050548	10.6502	10.1679	-1.40854	1.25293e-08	LAPTM4A	lysosomal protein transmembrane 4 alpha
7989335	10.8869	10.3739	-1.38808	1.28355e-08	ANXA2	annexin A2
8086517	6.95039	5.76299	-2.17289	1.30121e-08	CDCP1	CUB domain containing protein 1
8164217	7.56493	6.7438	-1.82077	1.36191e-08	FAM129B	family with sequence similarity 129, member B
8083569	8.03271	8.72493	1.60628	1.47967e-08	TIPARP	TCDD-inducible poly(ADP-ribose) polymerase
8109403	6.97794	5.94575	-2.14643	1.48097e-08	MFAP3	microfibrillar-associated protein 3
8066619	6.94933	5.76307	-2.24583	1.50024e-08	PLTP	phospholipid transfer protein
7955179	11.0488	10.5585	-1.37345	1.56058e-08	TUBA1C	tubulin, alpha 1c
7907104	8.2305	7.49078	-1.69776	1.59228e-08	DCAF6	DDB1 and CUL4 associated factor 6
8086706	7.10468	7.93136	1.71903	1.59789e-08	SETD2	SET domain containing 2
8152491	9.54813	8.90255	-1.59727	1.59895e-08	EXT1	exostosin 1
7968915	7.52711	8.15713	1.66509	1.62051e-08	GTF2F2	general transcription factor IIF, polypeptide 2, 30kDa
8105633	6.20038	7.10245	1.89501	1.63598e-08	PPWD1	peptidylprolyl isomerase domain and WD repeat containing 1
8126371	8.18135	7.46377	-1.69455	1.66487e-08	CCND3	cyclin D3
7932023	5.25593	6.45834	2.39054	1.70721e-08	USP6NL	USP6 N-terminal like
7953715	8.55818	7.84236	-1.66648	2.04367e-08	NECAP1	NECAP endocytosis associated 1
7975459	7.08309	6.11332	-2.043	2.07861e-08	SIPA1L1	signal-induced proliferation-associated 1 like 1
8135625	7.68964	6.82914	-1.78813	2.10041e-08	CAPZA2	capping protein (actin filament) muscle Z-line, alpha 2
7928882	6.27463	4.7677	-2.75252	2.15931e-08	C10orf116	chromosome 10 open reading frame 116
8120249	11.8626	12.2469	1.30079	2.21166e-08	RN7SK // RN7SK	RNA, 7SK small nuclear // RNA, 7SK small nuclear
7958989	6.65262	7.49336	1.79809	2.28985e-08	PLBD2	phospholipase B domain containing 2
8031712	4.21941	5.99534	3.84596	2.5009e-08	ZNF805	zinc finger protein 805
8023672	7.63479	8.36606	1.63752	2.54394e-08	VPS4B	vacuolar protein sorting 4 homolog B (S. cerevisiae)
8019762	9.72702	9.03711	-1.55339	2.77209e-08	P4HB	prolyl 4-hydroxylase, beta polypeptide
7966098	6.75908	7.57038	1.76948	2.80313e-08	SART3	squamous cell carcinoma antigen recognized by T cells 3
8117020	5.66782	6.73228	2.13393	2.8298e-08	MYLIP	myosin regulatory light chain interacting protein
7984517	6.78301	5.52927	-2.38637	2.89277e-08	GLCE	glucuronic acid epimerase
7916592	5.48062	6.62608	2.21606	2.93555e-08	MYSM1	Myb-like, SWIRM and MPN domains 1
7920271	9.65788	9.02078	-1.56168	2.95401e-08	S100A4	S100 calcium binding protein A4
8032480	9.07243	9.6747	1.57991	3.03082e-08	LSM7	LSM7 homolog, U6 small nuclear RNA associated (S. cerevisiae)
8131339	8.63626	7.93371	-1.65742	3.25409e-08	FSCN1	fascin homolog 1, actin-bundling protein (Strongylocentrotus purpuratus)
7968516	5.28865	6.57167	2.3412	3.25714e-08	PDS5B	PDS5, regulator of cohesion maintenance, homolog B (S. cerevisiae)
8039909	6.05217	6.99858	1.95534	3.36822e-08	CCNL2	cyclin L2
8085486	6.09497	7.03746	1.93485	3.52582e-08	XPC	xeroderma pigmentosum, complementation group C
8112803	6.83137	5.77659	-2.20127	3.65829e-08	LHFPL2	lipoma HMGIC fusion partner-like 2
8028186	7.44459	8.06785	1.6564	3.74347e-08	ZNF146	zinc finger protein 146
8099721	6.74467	5.60175	-2.32489	3.86921e-08	SEL1L3	sel-1 suppressor of lin-12-like 3 (C. elegans)
7949518	8.44527	9.11362	1.57426	3.89555e-08	FIBP	fibroblast growth factor (acidic) intracellular binding protein
7938286	9.71694	10.2942	1.46282	3.97934e-08	RPL27A	ribosomal protein L27a
8134699	10.3826	9.85649	-1.4196	3.97963e-08	COPS6	COP9 constitutive photomorphogenic homolog subunit 6 (Arabidopsis)
7995755	7.73758	6.93442	-1.76574	4.09473e-08	OGFOD1	2-oxoglutarate and iron-dependent oxygenase domain containing 1
7981982	5.87778	6.87889	2.05128	4.10678e-08	SNORD116-17	small nucleolar RNA, C/D box 116-17
7981986	5.87778	6.87889	2.05128	4.10678e-08	SNORD116-17	small nucleolar RNA, C/D box 116-17
7917103	6.50552	7.38583	1.81067	4.16712e-08	ZZZ3	zinc finger, ZZ-type containing 3
7973352	8.52577	7.7721	-1.65424	4.21433e-08	LRP10	low density lipoprotein receptor-related protein 10
7928944	9.48672	8.78492	-1.58841	4.22802e-08	PAPSS2	3'-phosphoadenosine 5'-phosphosulfate synthase 2
7949482	8.15591	7.37695	-1.68839	4.47911e-08	RNASEH2C	ribonuclease H2, subunit C
8090133	5.75369	6.79873	2.0484	4.69572e-08	CCDC14	coiled-coil domain containing 14
8135268	8.41736	9.02084	1.57223	4.81073e-08	EIF4B	eukaryotic translation initiation factor 4B
7954029	7.35403	8.10087	1.66215	4.88522e-08	CDKN1B	cyclin-dependent kinase inhibitor 1B (p27, Kip1)
8083978	6.42787	5.2246	-2.49163	5.1162e-08	NAALADL2	N-acetylated alpha-linked acidic dipeptidase-like 2
7974270	6.22396	4.68534	-2.76414	5.1733e-08	ATL1	atlastin GTPase 1
8042830	8.01768	7.19574	-1.70052	5.43214e-08	MTHFD2	methylenetetrahydrofolate dehydrogenase (NADP+ dependent) 2, methenyltetrahydrofolate cyclohydrolase
8142100	5.76537	6.54243	2.05673	5.83064e-08	ATXN7L1	ataxin 7-like 1
8025395	11.8323	11.4249	-1.33371	5.94026e-08	RPS28	ribosomal protein S28
8049544	6.68353	5.38574	-2.4067	6.00367e-08	LRRFIP1	leucine rich repeat (in FLII) interacting protein 1
8121749	10.1555	9.61493	-1.44197	6.10093e-08	GJA1	gap junction protein, alpha 1, 43kDa
7935692	7.76165	6.84289	-1.75122	6.26773e-08	ERLIN1	ER lipid raft associated 1
8021623	6.94844	5.68368	-2.10932	6.41939e-08	SERPINB7	serpin peptidase inhibitor, clade B (ovalbumin), member 7
7967933	4.9355	6.26987	2.63033	6.5438e-08	IFT88	intraflagellar transport 88 homolog (Chlamydomonas)
8169624	5.92642	4.38241	-2.89759	6.56169e-08	SLC25A43	solute carrier family 25, member 43
8062108	6.5036	5.28506	-2.48454	6.60293e-08	PROCR	protein C receptor, endothelial
8116402	6.97762	7.70205	1.72079	6.70405e-08	MAPK9	mitogen-activated protein kinase 9
8074647	6.68243	5.46693	-2.35583	6.89059e-08	PI4KA	phosphatidylinositol 4-kinase, catalytic, alpha
7983630	7.69688	6.92869	-1.76048	6.96822e-08	FGF7	fibroblast growth factor 7 (keratinocyte growth factor)
8043203	9.10343	8.28753	-1.65158	7.37368e-08	VAMP5	vesicle-associated membrane protein 5 (myobrevin)
8007154	8.38737	9.11626	1.56449	7.75854e-08	FKBP10	FK506 binding protein 10, 65 kDa
8020919	7.7585	8.47463	1.60229	7.88942e-08	C18orf21	chromosome 18 open reading frame 21
8122099	6.92495	5.76692	-2.10723	7.89099e-08	ENPP1	ectonucleotide pyrophosphatase/phosphodiesterase 1
7990545	6.00088	4.51392	-2.81146	8.26619e-08	CSPG4	chondroitin sulfate proteoglycan 4
8000192	6.12631	6.86815	1.9039	8.39961e-08	RRN3P1	RNA polymerase I transcription factor homolog (S. cerevisiae) pseudogene 1
7935058	9.62608	8.99035	-1.55128	8.56861e-08	MYOF	myoferlin
8107005	8.73347	8.13735	-1.64221	8.73324e-08	CAST	calpastatin
8102006	6.55239	7.37685	1.79491	8.90412e-08	MANBA	mannosidase, beta A, lysosomal
8138834	7.95529	8.54419	1.59222	9.57586e-08	FKBP14	FK506 binding protein 14, 22 kDa
7938111	7.5775	6.75807	-1.77615	1.00784e-07	FXC1	fracture callus 1 homolog (rat)
7974207	7.53311	6.76769	-1.78959	1.03345e-07	MGAT2	mannosyl (alpha-1,6-)-glycoprotein beta-1,2-N-acetylglucosaminyltransferase
8121911	5.7686	6.9702	1.94908	1.05335e-07	CENPW	centromere protein W
8141035	7.30816	8.0434	1.66582	1.05864e-07	SGCE	sarcoglycan, epsilon
7979179	6.87374	7.66755	1.72319	1.0614e-07	ERO1L	ERO1-like (S. cerevisiae)
8092707	8.92383	8.16182	-1.64432	1.06485e-07	LEPREL1	leprecan-like 1
7966829	8.77386	8.10672	-1.6389	1.10511e-07	WSB2	WD repeat and SOCS box-containing 2
7909529	6.83917	7.50525	1.73107	1.10608e-07	RCOR3	REST corepressor 3
7996908	7.10328	6.11188	-1.97163	1.10855e-07	SNTB2	syntrophin, beta 2 (dystrophin-associated protein A1, 59kDa, basic component 2)
7976621	5.81164	6.72438	2.02001	1.14071e-07	VRK1	vaccinia related kinase 1
8036913	8.43106	7.66961	-1.64021	1.16381e-07	BLVRB	biliverdin reductase B (flavin reductase (NADPH))
8150103	7.25876	6.37659	-1.86924	1.23267e-07	GTF2E2	general transcription factor IIE, polypeptide 2, beta 34kDa
8157605	9.9084	10.4227	1.41604	1.23415e-07	STOM	stomatin
8105463	7.45081	8.17307	1.63389	1.2432e-07	GPBP1	GC-rich promoter binding protein 1
8061564	5.58609	6.6778	2.09719	1.2835e-07	ID1	inhibitor of DNA binding 1, dominant negative helix-loop-helix protein
8126860	6.51662	7.37414	1.78748	1.35004e-07	MUT	methylmalonyl CoA mutase
8090893	6.09309	6.95622	1.90769	1.35756e-07	MSL2	male-specific lethal 2 homolog (Drosophila)
8113733	5.68171	6.67152	2.06603	1.36156e-07	CEP120	centrosomal protein 120kDa
7957221	7.59857	6.77962	-1.758	1.3953e-07	TRHDE	thyrotropin-releasing hormone degrading enzyme
8106820	6.27774	4.97833	-2.57924	1.39748e-07	POLR3G	polymerase (RNA) III (DNA directed) polypeptide G (32kD)
7906085	8.02521	7.27234	-1.67728	1.41695e-07	LMNA	lamin A/C
8056491	8.39574	7.7158	-1.63203	1.5042e-07	SCN9A	sodium channel, voltage-gated, type IX, alpha subunit
8112731	8.23209	7.4454	-1.64996	1.57683e-07	F2RL2	coagulation factor II (thrombin) receptor-like 2
8080847	5.16285	6.16879	2.40763	1.60004e-07	C3orf14	chromosome 3 open reading frame 14
7963646	7.12369	7.82587	1.6777	1.6117e-07	AAAS	achalasia, adrenocortical insufficiency, alacrimia (Allgrove, triple-A)
7916590	9.61372	9.00641	-1.53545	1.6644e-07	AK2	adenylate kinase 2
7975344	7.72293	6.87737	-1.73241	1.71916e-07	SLC39A9	solute carrier family 39 (zinc transporter), member 9
7956856	7.5402	6.72588	-1.77102	1.73426e-07	MSRB3	methionine sulfoxide reductase B3
8102860	10.0894	10.5741	1.38762	1.75615e-07	H3F3A	H3 histone, family 3A
7992917	6.33215	7.13963	1.81408	1.75634e-07	CLUAP1	clusterin associated protein 1
8132092	6.65359	5.50236	-2.27142	1.7933e-07	INMT	indolethylamine N-methyltransferase
8111455	6.46815	7.35643	1.78819	1.83202e-07	GUSBP1	glucuronidase, beta pseudogene 1
8115886	6.31879	7.18797	1.83094	1.83843e-07	THOC3	THO complex 3
8075828	6.43923	7.31241	1.8022	1.85964e-07	IFT27	intraflagellar transport 27 homolog (Chlamydomonas)
8059244	7.66903	8.38717	1.60189	1.87417e-07	CHPF	chondroitin polymerizing factor
8130032	7.85912	7.08311	-1.7069	1.93088e-07	FBXO30	F-box protein 30
8017651	10.1014	9.59346	-1.43481	1.96696e-07	SMURF2	SMAD specific E3 ubiquitin protein ligase 2
8073612	8.72355	8.04371	-1.62747	1.97686e-07	TSPO	translocator protein (18kDa)
8108217	10.2682	10.7387	1.36842	2.04761e-07	TGFBI	transforming growth factor, beta-induced, 68kDa
7942824	11.8931	11.4929	-1.3224	2.07635e-07	RPS28	ribosomal protein S28
8161024	10.2771	10.7511	1.36387	2.25885e-07	RMRP	RNA component of mitochondrial RNA processing endoribonuclease
8179827	11.2348	10.8234	-1.33543	2.31067e-07	CLIC1	chloride intracellular channel 1
8047127	8.80478	8.14277	-1.6271	2.33451e-07	MYO1B	myosin IB
8106660	6.78356	7.54106	1.71177	2.38245e-07	RASGRF2	Ras protein-specific guanine nucleotide-releasing factor 2
8074925	6.53949	7.39172	1.77016	2.41348e-07	LOC91316	glucuronidase, beta/immunoglobulin lambda-like polypeptide 1 pseudogene
7980189	7.18332	7.915	1.65746	2.49823e-07	KIAA0317	KIAA0317
8025051	6.93295	5.89394	-2.04797	2.51368e-07	TUBB4	tubulin, beta 4
8095021	6.33027	7.15091	1.81293	2.58774e-07	SPATA18	spermatogenesis associated 18 homolog (rat)
8110408	6.27157	7.15771	1.83436	2.67774e-07	THOC3	THO complex 3
7907680	6.8731	5.88331	-2.07965	2.80112e-07	FAM20B	family with sequence similarity 20, member B
7906671	5.07447	6.36709	2.43008	2.86223e-07	USP21	ubiquitin specific peptidase 21
8168087	7.57916	8.09938	1.61132	2.91891e-07	IGBP1	immunoglobulin (CD79A) binding protein 1
7956470	6.03343	6.97	1.90351	2.94676e-07	MBD6	methyl-CpG binding domain protein 6
8007867	6.27481	7.08575	1.81808	2.97304e-07	LRRC37A2	leucine rich repeat containing 37, member A2
7924450	7.66629	8.31859	1.59442	3.00354e-07	DUSP10	dual specificity phosphatase 10
7993349	7.12235	7.92913	1.65379	3.43662e-07	NPIP	nuclear pore complex interacting protein
7902269	8.44345	9.07337	1.54414	3.47223e-07	SFRS11	splicing factor, arginine/serine-rich 11
8000687	5.39963	6.40022	2.20499	3.51719e-07	SMG1	SMG1 homolog, phosphatidylinositol 3-kinase-related kinase (C. elegans)
7978208	6.91182	5.87734	-2.06631	3.51947e-07	TINF2	TERF1 (TRF1)-interacting nuclear factor 2
7899361	8.91801	8.20967	-1.62194	3.66357e-07	STX12	syntaxin 12
8007850	6.26613	7.07137	1.81539	3.68648e-07	LRRC37A2	leucine rich repeat containing 37, member A2
7899173	7.25464	6.35274	-1.82625	3.9723e-07	DHDDS	dehydrodolichyl diphosphate synthase
8097056	8.42571	9.0214	1.54322	4.15917e-07	SNORA24	small nucleolar RNA, H/ACA box 24
7968931	6.17023	6.90138	1.84237	4.17199e-07	COG3	component of oligomeric golgi complex 3
8152323	8.07451	8.76157	1.55508	4.30668e-07	EIF3E	eukaryotic translation initiation factor 3, subunit E
8099860	6.08724	6.99592	1.8641	4.43452e-07	RFC1	replication factor C (activator 1) 1, 145kDa
7990054	9.2364	8.57599	-1.60598	4.43626e-07	UACA	uveal autoantigen with coiled-coil domains and ankyrin repeats
8174891	6.66328	5.53231	-2.24429	4.5897e-07	MIR220A	microRNA 220a
8112980	8.17674	7.44833	-1.63299	4.63926e-07	EDIL3	EGF-like repeats and discoidin I-like domains 3
8093096	6.37932	7.14468	1.79348	4.70397e-07	TCTEX1D2	Tctex1 domain containing 2
8085954	7.38081	6.39288	-1.79427	4.72838e-07	AZI2	5-azacytidine induced 2
8022310	4.90453	6.24439	2.67203	4.79125e-07	FAM38B	family with sequence similarity 38, member B
7936064	7.82086	7.00699	-1.69735	4.87073e-07	NT5C2	5'-nucleotidase, cytosolic II
7913593	5.60698	6.61985	2.04441	5.01645e-07	TCEA3	transcription elongation factor A (SII), 3
7938683	6.93092	6.02005	-1.9751	5.15713e-07	LOC441453 // LOC441453 // LOC441453 // LOC441453	similar to olfactory receptor, family 7, subfamily A, member 17 // similar to olfactory receptor, family 7, subfamily A, member 17 // similar to olfactory receptor, family 7, subfamily A, member 17 // similar to olfactory receptor, family 7, subfamily A, member 17
8058849	7.23172	6.24024	-1.89216	5.22629e-07	MARCH4	membrane-associated ring finger (C3HC4) 4
7934196	9.44374	10.0151	1.49308	5.36972e-07	PSAP	prosaposin
7995895	8.00017	7.23337	-1.65662	5.54724e-07	HERPUD1	homocysteine-inducible, endoplasmic reticulum stress-inducible, ubiquitin-like domain member 1
7918825	9.37981	9.99662	1.49293	5.86354e-07	CSDE1	cold shock domain containing E1, RNA-binding
8021963	5.11446	6.21451	2.50908	5.91895e-07	C18orf56	chromosome 18 open reading frame 56
8114225	7.07595	7.76218	1.66403	6.10893e-07	H2AFY	H2A histone family, member Y
8092849	9.18616	8.54061	-1.60387	6.15396e-07	ATP13A3	ATPase type 13A3
8112020	6.66671	5.36531	-2.2917	6.30038e-07	MOCS2	molybdenum cofactor synthesis 2
8081465	7.38503	8.09192	1.61422	6.33158e-07	BBX	bobby sox homolog (Drosophila)
7983393	6.7857	5.69957	-2.11447	6.36061e-07	SORD	sorbitol dehydrogenase
8124531	5.98171	6.89355	1.87049	6.54556e-07	HIST1H3I	histone cluster 1, H3i
7997099	6.9181	7.62631	1.68114	6.6245e-07	SF3B3	splicing factor 3b, subunit 3, 130kDa
8024660	6.28812	7.23733	1.78936	6.64165e-07	HMG20B	high-mobility group 20B
7953291	9.2083	8.50474	-1.60046	6.67111e-07	CD9	CD9 molecule
8162352	6.38925	7.17893	1.78739	6.789e-07	NOL8	nucleolar protein 8
8098328	7.54317	8.29248	1.59452	6.99494e-07	GALNT7	UDP-N-acetyl-alpha-D-galactosamine:polypeptide N-acetylgalactosaminyltransferase 7 (GalNAc-T7)
7999752	9.66649	9.09303	-1.5034	7.24017e-07	LYRM2	LYR motif containing 2
8172244	7.26123	7.97883	1.62609	7.46568e-07	FUNDC1	FUN14 domain containing 1
8054771	8.0213	7.23016	-1.64554	7.59017e-07	SLC35F5	solute carrier family 35, member F5
8121489	6.80226	5.74051	-2.09816	7.9087e-07	AMD1	adenosylmethionine decarboxylase 1
7929677	6.46136	5.35777	-2.28681	8.00993e-07	PI4K2A	phosphatidylinositol 4-kinase type 2 alpha
8123137	7.28262	6.49256	-1.80145	8.42124e-07	ACAT2	acetyl-CoA acetyltransferase 2
7908766	9.3186	8.66797	-1.57658	8.48374e-07	TIMM17A	translocase of inner mitochondrial membrane 17 homolog A (yeast)
8053599	8.30186	8.8744	1.53419	8.51277e-07	WBP1	WW domain binding protein 1
8118890	6.01024	4.6158	-2.65071	8.5343e-07	SCUBE3	signal peptide, CUB domain, EGF-like 3
8165794	10.4932	10.0735	-1.37441	8.54759e-07	CD99	CD99 molecule
8176360	10.4932	10.0735	-1.37441	8.54759e-07	CD99	CD99 molecule
7926239	8.6781	7.91762	-1.59723	8.55087e-07	OPTN	optineurin
8049016	8.91764	8.27823	-1.60659	8.68155e-07	PSMD1	proteasome (prosome, macropain) 26S subunit, non-ATPase, 1
8060758	9.24828	8.57224	-1.59313	8.6872e-07	PRNP	prion protein
8113050	5.91706	6.72953	1.90996	8.80821e-07	CETN3	centrin, EF-hand protein, 3 (CDC31 homolog, yeast)
7938777	9.22699	8.5245	-1.59686	9.05541e-07	LDHA	lactate dehydrogenase A
7973306	7.98679	7.18444	-1.65115	9.12015e-07	ABHD4	abhydrolase domain containing 4
8029831	9.25338	8.61538	-1.58824	9.44966e-07	CALM3	calmodulin 3 (phosphorylase kinase, delta)
8130916	6.51575	7.28558	1.75536	9.45335e-07	PHF10	PHD finger protein 10
8133721	8.84052	8.06585	-1.60151	9.45584e-07	HSPB1	heat shock 27kDa protein 1
8048980	7.46005	8.13753	1.60801	9.74562e-07	CAB39	calcium binding protein 39
8042066	7.74235	8.28909	1.5712	1.02659e-06	CCDC104	coiled-coil domain containing 104
7993359	7.13984	7.93555	1.63121	1.0356e-06	NPIP	nuclear pore complex interacting protein
8156060	7.36774	8.07587	1.60998	1.03862e-06	TLE4	transducin-like enhancer of split 4 (E(sp1) homolog, Drosophila)
8078544	7.06899	7.72332	1.65311	1.05621e-06	MLH1	mutL homolog 1, colon cancer, nonpolyposis type 2 (E. coli)
8163672	9.89643	9.38667	-1.44971	1.06961e-06	PAPPA	pregnancy-associated plasma protein A, pappalysin 1
8136347	9.2642	8.61695	-1.57887	1.08439e-06	CALD1	caldesmon 1
8152512	9.59306	9.01537	-1.50636	1.09036e-06	TNFRSF11B	tumor necrosis factor receptor superfamily, member 11b
8043377	8.73122	9.30091	1.52841	1.11516e-06	WBP1	WW domain binding protein 1
8072946	8.48393	9.13051	1.52682	1.11531e-06	EIF3L	eukaryotic translation initiation factor 3, subunit L
7987385	5.16922	6.31472	2.33213	1.13818e-06	MEIS2	Meis homeobox 2
8115524	8.96548	8.25369	-1.60156	1.14178e-06	CLINT1	clathrin interactor 1
8140942	6.58283	7.26055	1.73655	1.15022e-06	FAM133B	family with sequence similarity 133, member B
8017283	4.36937	6.0349	3.19558	1.15391e-06	INTS2	integrator complex subunit 2
8032380	6.64057	7.38116	1.71696	1.15635e-06	BTBD2	BTB (POZ) domain containing 2
7993458	5.39046	6.50386	2.15295	1.20225e-06	C16orf45	chromosome 16 open reading frame 45
8128867	5.63075	6.59232	1.97068	1.20608e-06	CDK19	cyclin-dependent kinase 19
7972217	6.89079	7.63714	1.67599	1.24946e-06	SPRY2	sprouty homolog 2 (Drosophila)
7947867	8.96717	8.24922	-1.59966	1.25857e-06	PSMC3	proteasome (prosome, macropain) 26S subunit, ATPase, 3
8122660	6.12055	5.02909	-2.49936	1.26743e-06	UST	uronyl-2-sulfotransferase
7960221	6.63311	7.33325	1.72786	1.29093e-06	KDM5A	lysine (K)-specific demethylase 5A
7979416	6.79754	7.57169	1.68508	1.2928e-06	TIMM9	translocase of inner mitochondrial membrane 9 homolog (yeast)
7921970	7.90277	7.20238	-1.64644	1.31714e-06	ALDH9A1	aldehyde dehydrogenase 9 family, member A1
8112202	8.72832	9.28674	1.52553	1.36245e-06	PLK2	polo-like kinase 2 (Drosophila)
7911085	6.72712	5.6211	-2.15818	1.43786e-06	FAM36A	family with sequence similarity 36, member A
8005661	6.91881	7.67338	1.66292	1.44644e-06	CYTSB	cytospin B
8080973	6.17051	6.98251	1.81194	1.45598e-06	PPP4R2	protein phosphatase 4, regulatory subunit 2
7911539	6.18676	7.00853	1.80046	1.49638e-06	CCNL2	cyclin L2
7966368	8.67323	9.31869	1.52313	1.5321e-06	PPP1CC	protein phosphatase 1, catalytic subunit, gamma isozyme
7964250	7.76693	8.30892	1.56657	1.55078e-06	PTGES3	prostaglandin E synthase 3 (cytosolic)
8166705	8.03405	7.28093	-1.62976	1.57459e-06	PRRG1	proline rich Gla (G-carboxyglutamic acid) 1
8063351	5.48845	6.48914	2.11553	1.63709e-06	SLC9A8	solute carrier family 9 (sodium/hydrogen exchanger), member 8
7978666	6.53148	7.29743	1.75372	1.71184e-06	MBIP	MAP3K12 binding inhibitory protein 1
7934393	6.86082	7.62784	1.67231	1.71298e-06	PPP3CB	protein phosphatase 3, catalytic subunit, beta isozyme
8150509	7.57549	6.8651	-1.71379	1.71451e-06	PLAT	plasminogen activator, tissue
8027241	3.64123	5.78912	4.28708	1.73633e-06	ZNF253	zinc finger protein 253
7936284	7.94702	7.27262	-1.63834	1.73969e-06	XPNPEP1	X-prolyl aminopeptidase (aminopeptidase P) 1, soluble
8138145	7.25754	6.26225	-1.81501	1.7617e-06	MGC72080	MGC72080 pseudogene
8093053	8.08826	7.34436	-1.61897	1.78754e-06	TFRC	transferrin receptor (p90, CD71)
8057719	6.69534	5.47377	-2.17214	1.79406e-06	HIBCH	3-hydroxyisobutyryl-CoA hydrolase
8155234	5.59556	6.66357	1.99842	1.80614e-06	ZCCHC7	zinc finger, CCHC domain containing 7
7965855	7.41989	8.08818	1.59367	1.82677e-06	NUP37	nucleoporin 37kDa
8065403	10.3162	10.7473	1.3452	1.84831e-06	CST3	cystatin C
8092067	7.25896	6.43694	-1.79379	1.85974e-06	RPL22L1	ribosomal protein L22-like 1
7999766	7.06633	7.76488	1.64765	1.89156e-06	NPIP	nuclear pore complex interacting protein
7999769	6.85623	7.58005	1.66611	1.9808e-06	NPIP	nuclear pore complex interacting protein
8170166	7.15994	7.8178	1.62213	2.02381e-06	HTATSF1	HIV-1 Tat specific factor 1
8134869	8.39407	9.03126	1.51859	2.0404e-06	PCOLCE	procollagen C-endopeptidase enhancer
8049435	6.98567	6.06043	-1.91366	2.15033e-06	SH3BP4	SH3-domain binding protein 4
8056323	6.5107	7.20196	1.73119	2.15986e-06	FIGN	fidgetin
8088820	7.00375	5.9629	-1.96448	2.3133e-06	RYBP	RING1 and YY1 binding protein
8037505	5.98611	6.78266	1.87708	2.41505e-06	TRAPPC6A	trafficking protein particle complex 6A
8119609	6.77664	7.52644	1.67404	2.41531e-06	CNPY3	canopy 3 homolog (zebrafish)
8075106	7.46016	6.76673	-1.72067	2.42562e-06	TPST2	tyrosylprotein sulfotransferase 2
8064844	7.15008	7.84221	1.62376	2.45295e-06	PCNA	proliferating cell nuclear antigen
7945573	10.5876	10.1914	-1.35481	2.53798e-06	POLR2L	polymerase (RNA) II (DNA directed) polypeptide L, 7.6kDa
8168873	7.86696	7.00049	-1.65888	2.54006e-06	ARMCX6	armadillo repeat containing, X-linked 6
8156601	5.16639	6.33113	2.20786	2.56443e-06	C9orf102	chromosome 9 open reading frame 102
8035838	4.53365	6.16044	2.78206	2.56541e-06	ZNF724P	zinc finger protein 724 (pseudogene)
7931728	7.55471	8.18458	1.57946	2.56766e-06	LARP4B	La ribonucleoprotein domain family, member 4B
8058127	6.18228	6.88972	1.79764	2.57195e-06	CLK1	CDC-like kinase 1
8104788	9.23203	8.56151	-1.56882	2.60255e-06	RAI14	retinoic acid induced 14
8119067	6.66472	5.60755	-2.11545	2.6052e-06	KCTD20	potassium channel tetramerisation domain containing 20
7908097	6.6673	5.513	-2.15855	2.65807e-06	SMG7	Smg-7 homolog, nonsense mediated mRNA decay factor (C. elegans)
8056060	5.86141	6.69413	1.91467	2.66218e-06	BAZ2B	bromodomain adjacent to zinc finger domain, 2B
7989611	6.83893	7.58128	1.66722	2.75559e-06	FAM96A	family with sequence similarity 96, member A
8035628	4.64053	6.11663	2.78843	2.76149e-06	NR2C2AP	nuclear receptor 2C2-associated protein
8072645	6.43994	7.16132	1.74459	2.81967e-06	HMGXB4	HMG box domain containing 4
7899774	7.97079	8.56591	1.53581	2.84304e-06	HDAC1	histone deacetylase 1
8109350	6.64914	5.63885	-2.1343	2.85173e-06	SLC36A1	solute carrier family 36 (proton/amino acid symporter), member 1
8028756	8.7595	8.12215	-1.58009	2.88821e-06	PSMC4	proteasome (prosome, macropain) 26S subunit, ATPase, 4
8133114	6.78972	5.68533	-2.04175	3.13449e-06	VKORC1L1	vitamin K epoxide reductase complex, subunit 1-like 1
8117777	7.88214	8.53919	1.53837	3.15909e-06	HLA-H	major histocompatibility complex, class I, H (pseudogene)
8009432	7.71481	8.3857	1.55563	3.17409e-06	AMZ2	archaelysin family metallopeptidase 2
8005765	6.58733	7.37413	1.70543	3.17509e-06	WSB1	WD repeat and SOCS box-containing 1
8159379	7.99684	7.40981	-1.61946	3.19394e-06	TMEM141	transmembrane protein 141
7933877	6.03672	6.92814	1.85087	3.24285e-06	JMJD1C	jumonji domain containing 1C
8019877	5.7751	6.74841	1.92176	3.25932e-06	SMCHD1	structural maintenance of chromosomes flexible hinge domain containing 1
7987248	4.94425	6.10905	2.47071	3.27323e-06	GOLGA8B	golgin A8 family, member B
8104506	8.38185	7.76404	-1.57509	3.31337e-06	TRIO	triple functional domain (PTPRF interacting)
8143040	6.95661	7.57065	1.65719	3.35966e-06	SLC35B4	solute carrier family 35, member B4
8090772	5.74364	6.80554	1.91266	3.41465e-06	TOPBP1	topoisomerase (DNA) II binding protein 1
7914557	6.89978	5.71839	-1.98831	3.45276e-06	SYNC	syncoilin, intermediate filament protein
8157216	8.45409	7.71928	-1.5723	3.53214e-06	UGCG	UDP-glucose ceramide glucosyltransferase
7952341	8.21259	7.59221	-1.59223	3.65434e-06	ASAM	adipocyte-specific adhesion molecule
8130163	6.918	5.93232	-1.93077	3.67123e-06	RAET1G	retinoic acid early transcript 1G
8162940	6.505	5.36373	-2.22248	3.74827e-06	ABCA1	ATP-binding cassette, sub-family A (ABC1), member 1
7965436	7.62546	8.21991	1.55802	3.7489e-06	EEA1	early endosome antigen 1
7968132	6.36909	7.0902	1.7502	3.75135e-06	NUPL1	nucleoporin like 1
7973036	6.01569	6.8457	1.83612	3.76059e-06	PARP2	poly (ADP-ribose) polymerase 2
7954711	5.36843	6.4662	2.21155	3.78394e-06	C12orf35	chromosome 12 open reading frame 35
8092035	6.85485	7.50059	1.67298	3.84799e-06	PHC3	polyhomeotic homolog 3 (Drosophila)
8161919	5.35298	6.4161	2.14487	3.85775e-06	TLE1	transducin-like enhancer of split 1 (E(sp1) homolog, Drosophila)
8006762	7.90682	8.49125	1.53324	3.9199e-06	MRPL45	mitochondrial ribosomal protein L45
8063337	9.70692	10.1701	1.41689	4.10908e-06	C20orf199	chromosome 20 open reading frame 199
7999634	6.58445	7.44042	1.6851	4.27614e-06	NPIP	nuclear pore complex interacting protein
8131944	6.58577	5.55807	-2.16221	4.33319e-06	NFE2L3	nuclear factor (erythroid-derived 2)-like 3
8059905	9.57322	10.0946	1.43706	4.46619e-06	COL6A3	collagen, type VI, alpha 3
8065607	6.67794	7.48267	1.68499	4.77254e-06	PLAGL2	pleiomorphic adenoma gene-like 2
8095728	6.3957	7.13553	1.73776	4.78031e-06	EREG	epiregulin
7950838	9.20615	8.60885	-1.5638	4.81732e-06	PICALM	phosphatidylinositol binding clathrin assembly protein
8154962	6.57363	7.28106	1.70928	4.84053e-06	DNAJB5	DnaJ (Hsp40) homolog, subfamily B, member 5
8169541	6.64636	7.44922	1.68765	4.89369e-06	DOCK11	dedicator of cytokinesis 11
8089062	8.02898	8.62507	1.52148	4.8996e-06	CLDND1	claudin domain containing 1
8142345	5.28592	6.38276	2.16966	5.07668e-06	DOCK4	dedicator of cytokinesis 4
8146427	5.55466	6.72037	1.96376	5.11863e-06	PCMTD1	protein-L-isoaspartate (D-aspartate) O-methyltransferase domain containing 1
7988581	7.16669	7.89095	1.60251	5.32152e-06	SECISBP2L	SECIS binding protein 2-like
7978492	6.41734	5.20651	-2.28136	5.32634e-06	HEATR5A	HEAT repeat containing 5A
7970546	6.07748	6.78767	1.82697	5.3801e-06	EFHA1	EF-hand domain family, member A1
8133818	5.55282	6.55358	2.01214	5.56141e-06	PHTF2	putative homeodomain transcription factor 2
7994559	5.85917	6.73285	1.86783	5.60301e-06	PDXDC2	pyridoxal-dependent decarboxylase domain containing 2
8086505	7.79091	7.01663	-1.64169	5.6415e-06	ZDHHC3	zinc finger, DHHC-type containing 3
7936871	8.18909	7.55113	-1.58228	5.68485e-06	OAT	ornithine aminotransferase
8024436	10.5429	10.085	-1.35378	5.69527e-06	OAZ1	ornithine decarboxylase antizyme 1
8125048	7.34271	7.98651	1.58298	5.76605e-06	DDAH2	dimethylarginine dimethylaminohydrolase 2
8148280	7.54816	6.89692	-1.6836	5.77798e-06	SQLE	squalene epoxidase
8036737	11.8421	12.1665	1.26278	5.85508e-06	RPS16	ribosomal protein S16
7910640	7.26883	7.87742	1.59428	5.94173e-06	GGPS1	geranylgeranyl diphosphate synthase 1
8155487	7.18697	6.29926	-1.76768	6.17937e-06	KGFLP1	keratinocyte growth factor-like protein 1
8161423	7.18697	6.29926	-1.76768	6.17937e-06	KGFLP1	keratinocyte growth factor-like protein 1
8161455	7.18697	6.29926	-1.76768	6.17937e-06	KGFLP1	keratinocyte growth factor-like protein 1
8084912	7.67787	8.28956	1.5428	6.23126e-06	SDHAP2	succinate dehydrogenase complex, subunit A, flavoprotein pseudogene 2
8096938	6.11503	6.91378	1.78077	6.46661e-06	LARP7	La ribonucleoprotein domain family, member 7
7932512	7.22944	7.90425	1.59435	6.57528e-06	DNAJC1	DnaJ (Hsp40) homolog, subfamily C, member 1
7957649	8.53086	9.0991	1.50037	6.64129e-06	SNRPF	small nuclear ribonucleoprotein polypeptide F
8000501	5.74974	6.66991	1.89769	6.64362e-06	PDXDC2	pyridoxal-dependent decarboxylase domain containing 2
8166140	6.22086	6.99716	1.76394	6.75635e-06	MOSPD2	motile sperm domain containing 2
7948667	8.91898	8.31007	-1.56777	7.0342e-06	AHNAK	AHNAK nucleoprotein
8065433	7.90465	8.51959	1.52194	7.04536e-06	C20orf3	chromosome 20 open reading frame 3
8041236	5.65591	6.67931	1.93493	7.05397e-06	SPAST	spastin
8102415	8.60217	7.95437	-1.55716	7.05477e-06	CAMK2D	calcium/calmodulin-dependent protein kinase II delta
8156826	7.79431	8.35465	1.53601	7.09981e-06	TGFBR1	transforming growth factor, beta receptor 1
8144378	4.98678	6.29782	2.32615	7.12111e-06	AGPAT5	1-acylglycerol-3-phosphate O-acyltransferase 5 (lysophosphatidic acid acyltransferase, epsilon)
8044686	9.86594	9.32785	-1.43073	7.12932e-06	ACTR3	ARP3 actin-related protein 3 homolog (yeast)
8130499	10.0271	9.56467	-1.40096	7.35648e-06	DYNLT1	dynein, light chain, Tctex-type 1
8027650	6.6305	7.38281	1.68821	7.40927e-06	UBA2	ubiquitin-like modifier activating enzyme 2
7978760	5.40499	6.44965	2.05388	7.47401e-06	KLHL28	kelch-like 28 (Drosophila)
8110589	5.54861	6.56724	1.99065	7.50206e-06	CNOT6	CCR4-NOT transcription complex, subunit 6
8004175	9.09302	8.48039	-1.56461	7.52321e-06	TXNDC17	thioredoxin domain containing 17
7979572	7.00363	7.84978	1.60609	7.60234e-06	---	---
7901601	9.39682	8.77083	-1.52088	7.73913e-06	MRPL37	mitochondrial ribosomal protein L37
8048304	5.96037	6.8732	1.82589	7.77489e-06	CTDSP1	CTD (carboxy-terminal domain, RNA polymerase II, polypeptide A) small phosphatase 1
8168749	7.26898	6.44948	-1.75413	7.89863e-06	SRPX2	sushi-repeat-containing protein, X-linked 2
7945182	9.17737	9.77554	1.48834	7.93268e-06	APLP2	amyloid beta (A4) precursor-like protein 2
8000482	9.46588	8.92038	-1.51184	8.04562e-06	XPO6	exportin 6
8020068	6.22294	6.97082	1.77452	8.04707e-06	ANKRD12	ankyrin repeat domain 12
8122986	7.3707	6.53963	-1.72444	8.12798e-06	SNX9	sorting nexin 9
8165309	11.2461	10.8782	-1.30378	8.26017e-06	EDF1	endothelial differentiation-related factor 1
8028227	5.07371	6.21926	2.2095	8.26044e-06	ZNF383	zinc finger protein 383
8018305	9.27612	8.7045	-1.53589	8.26242e-06	HN1	hematological and neurological expressed 1
8078248	8.53119	9.09744	1.49695	8.35351e-06	HMGB1	high-mobility group box 1
8046726	7.997	8.55945	1.51533	8.37606e-06	SSFA2	sperm specific antigen 2
8165680	9.34234	9.83823	1.472	8.37907e-06	---	---
8117368	6.51497	7.31679	1.70138	8.4628e-06	HIST1H4C	histone cluster 1, H4c
8069252	5.58236	6.44985	1.96918	8.51459e-06	PCBP3	poly(rC) binding protein 3
8013906	8.26345	8.92006	1.49934	8.60109e-06	TWF1	twinfilin, actin-binding protein, homolog 1 (Drosophila)
8022320	5.80917	6.67849	1.85899	8.63134e-06	NPIPL3	nuclear pore complex interacting protein-like 3
8068401	7.77042	7.11881	-1.63412	8.91285e-06	CBR1	carbonyl reductase 1
8154836	10.0625	9.569	-1.39459	9.07543e-06	ANXA2P2 // ANXA2P2 // ANXA2P2	annexin A2 pseudogene 2 // annexin A2 pseudogene 2 // annexin A2 pseudogene 2
8117535	5.32357	6.37739	2.11239	9.12665e-06	HIST1H2AG	histone cluster 1, H2ag
8069178	5.15479	6.35305	2.24318	9.20195e-06	ADARB1	adenosine deaminase, RNA-specific, B1 (RED1 homolog rat)
7973056	8.28348	8.82979	1.49889	9.28365e-06	APEX1	APEX nuclease (multifunctional DNA repair enzyme) 1
7976812	6.99614	7.56175	1.63718	9.31362e-06	SNORD113-4	small nucleolar RNA, C/D box 113-4
8030212	6.73851	7.47344	1.64874	9.55044e-06	LIN7B	lin-7 homolog B (C. elegans)
8050007	9.87989	10.3454	1.37637	9.6085e-06	PXDN	peroxidasin homolog (Drosophila)
7979473	8.44646	7.75994	-1.55469	9.6093e-06	DHRS7	dehydrogenase/reductase (SDR family) member 7
8152280	6.95653	5.88292	-1.93219	9.73137e-06	LRP12	low density lipoprotein receptor-related protein 12
8098714	7.25727	7.95875	1.58592	9.81747e-06	FRG1	FSHD region gene 1
8046461	7.33287	6.55906	-1.73048	9.8377e-06	ZAK	sterile alpha motif and leucine zipper containing kinase AZK
8151587	8.2342	8.75358	1.50195	9.89289e-06	C8orf59	chromosome 8 open reading frame 59
7936706	6.58025	7.2156	1.68724	9.93498e-06	C10orf119	chromosome 10 open reading frame 119
7968658	5.19643	6.19447	2.26083	9.99177e-06	EXOSC8	exosome component 8
7901123	6.60532	7.43384	1.66737	1.01314e-05	NASP	nuclear autoantigenic sperm protein (histone-binding)
7980580	5.65043	6.52338	1.95013	1.02351e-05	GALC	galactosylceramidase
8000413	7.68222	8.33755	1.53735	1.1073e-05	NSMCE1	non-SMC element 1 homolog (S. cerevisiae)
8053890	8.63294	7.95185	-1.54943	1.11165e-05	STARD7	StAR-related lipid transfer (START) domain containing 7
8047788	6.16268	4.56158	-2.37158	1.15485e-05	ADAM23	ADAM metallopeptidase domain 23
7982154	6.30631	7.12854	1.73447	1.15813e-05	HERC2P2	hect domain and RLD 2 pseudogene 2
8143597	8.19224	7.51538	-1.56394	1.16393e-05	FAM115A	family with sequence similarity 115, member A
8085689	6.05828	6.86552	1.7984	1.20457e-05	TBC1D5	TBC1 domain family, member 5
8063607	7.22957	7.86964	1.58715	1.2214e-05	RAB22A	RAB22A, member RAS oncogene family
8057677	6.68696	5.6005	-2.04111	1.22582e-05	SLC40A1	solute carrier family 40 (iron-regulated transporter), member 1
8103535	6.52482	5.66004	-2.04622	1.2393e-05	GK3P	glycerol kinase 3 pseudogene
8074980	7.33856	6.64887	-1.69342	1.24403e-05	GSTT1	glutathione S-transferase theta 1
8075728	8.40367	7.75858	-1.54884	1.25666e-05	MYH9	myosin, heavy chain 9, non-muscle
7902367	6.61823	5.5153	-2.08971	1.26147e-05	ACADM	acyl-CoA dehydrogenase, C-4 to C-12 straight chain
8161192	7.56143	6.97928	-1.65714	1.26792e-05	RNF38	ring finger protein 38
7999614	6.50033	7.31593	1.68615	1.2853e-05	PKD1	polycystic kidney disease 1 (autosomal dominant)
8128669	6.78536	5.67128	-1.9853	1.29681e-05	OSTM1	osteopetrosis associated transmembrane protein 1
8156476	5.27907	6.39492	2.08552	1.30903e-05	PHF2	PHD finger protein 2
8020110	6.86012	5.99046	-1.92428	1.341e-05	RAB31	RAB31, member RAS oncogene family
7997239	5.73815	6.65829	1.88026	1.34175e-05	PDXDC2	pyridoxal-dependent decarboxylase domain containing 2
7980152	6.90905	7.66049	1.61756	1.36096e-05	LTBP2	latent transforming growth factor beta binding protein 2
7898337	8.17191	7.53544	-1.56391	1.38402e-05	NECAP2	NECAP endocytosis associated 2
8041781	10.3328	9.88714	-1.358	1.38665e-05	EPAS1	endothelial PAS domain protein 1
8040142	6.58214	7.37776	1.67853	1.38936e-05	CPSF3	cleavage and polyadenylation specific factor 3, 73kDa
8015460	8.77762	8.16917	-1.54975	1.39051e-05	ACLY	ATP citrate lyase
8098637	5.87316	6.6907	1.86385	1.48907e-05	CYP4V2	cytochrome P450, family 4, subfamily V, polypeptide 2
7962349	6.03693	4.63333	-2.4597	1.50549e-05	GXYLT1	glucoside xylosyltransferase 1
7989128	4.69923	6.06695	2.71185	1.56775e-05	CNOT6L	CCR4-NOT transcription complex, subunit 6-like
8137627	7.11413	6.38172	-1.7573	1.59994e-05	DNAJB6	DnaJ (Hsp40) homolog, subfamily B, member 6
7981943	4.03881	5.63005	3.10823	1.62281e-05	PAR5	Prader-Willi/Angelman syndrome-5
7999642	6.44626	7.0936	1.69637	1.62991e-05	KIAA0430	KIAA0430
7930139	7.39463	6.61925	-1.68696	1.64774e-05	TRIM8	tripartite motif-containing 8
8112564	4.93523	6.16992	2.3978	1.67749e-05	GUSBP3	glucuronidase, beta pseudogene 3
7993546	6.75384	7.46426	1.64333	1.69567e-05	NPIP	nuclear pore complex interacting protein
7936578	6.78054	7.53828	1.64089	1.70071e-05	C10orf84	chromosome 10 open reading frame 84
8129562	10.115	9.6363	-1.37917	1.71154e-05	CTGF	connective tissue growth factor
8063893	8.74592	8.08113	-1.54384	1.72819e-05	ADRM1	adhesion regulating molecule 1
7898833	7.68087	8.28455	1.52981	1.76584e-05	KDM1A	lysine (K)-specific demethylase 1A
8036389	5.88956	6.76529	1.83854	1.77321e-05	ZNF585B	zinc finger protein 585B
8073022	6.65329	7.38267	1.66371	1.81641e-05	CBY1	chibby homolog 1 (Drosophila)
8169294	4.62133	6.05889	2.64712	1.84313e-05	COL4A5	collagen, type IV, alpha 5
7962194	6.77415	7.496	1.63367	1.87125e-05	H3F3C	H3 histone, family 3C
8079746	7.7344	6.98562	-1.63143	1.92111e-05	TCTA	T-cell leukemia translocation altered gene
8106534	6.73701	7.50577	1.63666	1.94945e-05	PAPD4	PAP associated domain containing 4
7934178	7.84029	7.08783	-1.6169	1.96329e-05	PCBD1	pterin-4 alpha-carbinolamine dehydratase/dimerization cofactor of hepatocyte nuclear factor 1 alpha
8056201	8.91117	8.32803	-1.54816	1.98111e-05	RBMS1	RNA binding motif, single stranded interacting protein 1
8123467	5.29537	6.39289	2.11022	1.98979e-05	C6orf70	chromosome 6 open reading frame 70
8171111	10.6449	11.0377	1.30359	2.04824e-05	SLC25A6	solute carrier family 25 (mitochondrial carrier; adenine nucleotide translocator), member 6
8177003	10.6449	11.0377	1.30359	2.04824e-05	SLC25A6	solute carrier family 25 (mitochondrial carrier; adenine nucleotide translocator), member 6
8142671	8.22783	8.82632	1.48747	2.06966e-05	WASL	Wiskott-Aldrich syndrome-like
8109576	6.21415	7.0183	1.73369	2.07241e-05	THG1L	tRNA-histidine guanylyltransferase 1-like (S. cerevisiae)
8044417	6.76001	5.70012	-1.946	2.08265e-05	TMEM87B	transmembrane protein 87B
8146921	7.88616	7.18396	-1.60261	2.12575e-05	RDH10	retinol dehydrogenase 10 (all-trans)
7905339	5.06334	6.31508	2.25721	2.12647e-05	GABPB2	GA binding protein transcription factor, beta subunit 2
7956088	8.489	7.90804	-1.53628	2.14962e-05	RAB5B	RAB5B, member RAS oncogene family
8174076	6.87048	6.00103	-1.87401	2.17474e-05	GLA	galactosidase, alpha
8061497	5.66161	6.63594	1.91386	2.17966e-05	FRG1B	FSHD region gene 1 family, member B
7969736	7.66092	6.99537	-1.62548	2.27864e-05	FARP1	FERM, RhoGEF (ARHGEF) and pleckstrin domain protein 1 (chondrocyte-derived)
8101723	7.28976	6.49181	-1.71049	2.28433e-05	NAP1L5	nucleosome assembly protein 1-like 5
8160487	8.10412	7.48838	-1.56119	2.31372e-05	PLAA	phospholipase A2-activating protein
8114797	6.58482	7.40466	1.65913	2.33554e-05	SPRY4	sprouty homolog 4 (Drosophila)
7994371	5.77369	6.62734	1.85857	2.41377e-05	NPIPL3	nuclear pore complex interacting protein-like 3
8178598	11.2208	10.8327	-1.29441	2.46087e-05	CLIC1	chloride intracellular channel 1
8001537	7.18995	7.84872	1.57031	2.47498e-05	FAM192A	family with sequence similarity 192, member A
7920000	6.4718	7.14341	1.6925	2.47917e-05	POGZ	pogo transposable element with ZNF domain
8064302	6.00088	6.70798	1.82853	2.55508e-05	PCMTD2	protein-L-isoaspartate (D-aspartate) O-methyltransferase domain containing 2
7992529	7.18402	6.38288	-1.73658	2.57527e-05	TRAF7	TNF receptor-associated factor 7
7918749	6.78104	5.92713	-1.9119	2.58136e-05	DENND2C	DENN/MADD domain containing 2C
8046515	10.1718	10.5937	1.33074	2.65732e-05	H3F3A	H3 histone, family 3A
8079869	6.54872	7.34428	1.66706	2.66138e-05	RBM5	RNA binding motif protein 5
7904433	6.44664	7.19379	1.67842	2.67066e-05	PHGDH	phosphoglycerate dehydrogenase
7915733	10.2017	9.75354	-1.36343	2.76207e-05	PRDX1	peroxiredoxin 1
8152628	8.49137	7.91389	-1.53112	2.76828e-05	DERL1	Der1-like domain family, member 1
8110169	7.05283	7.72282	1.5912	2.86271e-05	FAF2	Fas associated factor family member 2
8076209	11.0114	11.3635	1.28164	2.86738e-05	RPL3	ribosomal protein L3
7920492	8.7985	9.37637	1.48079	2.89616e-05	C1orf43	chromosome 1 open reading frame 43
8006736	7.21198	6.39334	-1.72156	2.9088e-05	DUSP14	dual specificity phosphatase 14
8027621	9.32961	8.80216	-1.50857	2.91923e-05	GPI	glucose-6-phosphate isomerase
8170648	8.24467	7.72786	-1.53505	2.99378e-05	BGN	biglycan
8120758	7.24103	7.83229	1.56845	3.09837e-05	SENP6	SUMO1/sentrin specific peptidase 6
8139430	6.94928	6.03756	-1.84109	3.10256e-05	PURB	purine-rich element binding protein B
8041808	7.66833	7.20309	-1.6061	3.12194e-05	RHOQ	ras homolog gene family, member Q
8118974	10.6619	11.0482	1.29737	3.2221e-05	RPL10A	ribosomal protein L10a
8045619	6.07003	6.82026	1.77157	3.25471e-05	EPC2	enhancer of polycomb homolog 2 (Drosophila)
7927353	5.11584	6.18065	2.25973	3.37635e-05	AGAP5	ArfGAP with GTPase domain, ankyrin repeat and PH domain 5
7933331	5.11584	6.18065	2.25973	3.37635e-05	AGAP5	ArfGAP with GTPase domain, ankyrin repeat and PH domain 5
7939365	7.46123	8.09314	1.53625	3.5111e-05	FJX1	four jointed box 1 (Drosophila)
8002333	6.86386	7.64187	1.60098	3.51772e-05	SMG1	SMG1 homolog, phosphatidylinositol 3-kinase-related kinase (C. elegans)
7993371	9.7681	10.2225	1.3807	3.55612e-05	NOMO3	NODAL modulator 3
7993511	9.7681	10.2225	1.3807	3.55612e-05	NOMO3	NODAL modulator 3
7999791	9.7681	10.2225	1.3807	3.55612e-05	NOMO3	NODAL modulator 3
7906852	9.46968	8.91821	-1.48327	3.57551e-05	UHMK1	U2AF homology motif (UHM) kinase 1
8178790	6.58207	5.55417	-2.09466	3.59964e-05	GPSM3	G-protein signaling modulator 3 (AGS3-like, C. elegans)
8014100	5.97294	6.71862	1.8097	3.63192e-05	C17orf75	chromosome 17 open reading frame 75
7974366	4.89081	5.97337	2.47379	3.68359e-05	PTGER2	prostaglandin E receptor 2 (subtype EP2), 53kDa
8045381	5.36181	6.40156	2.06385	3.69226e-05	CCNT2	cyclin T2
8178590	7.43044	8.0766	1.53947	3.71556e-05	DDAH2	dimethylarginine dimethylaminohydrolase 2
8179819	7.43044	8.0766	1.53947	3.71556e-05	DDAH2	dimethylarginine dimethylaminohydrolase 2
7916262	8.78629	8.22019	-1.53106	3.76326e-05	CPT2	carnitine palmitoyltransferase 2
8175302	7.76011	8.34575	1.50913	3.82962e-05	FAM127B	family with sequence similarity 127, member B
8031933	10.5987	10.9792	1.29835	3.84815e-05	RPS5	ribosomal protein S5
8112622	7.27259	6.44276	-1.69686	3.96879e-05	GFM2	G elongation factor, mitochondrial 2
8041967	8.15651	8.68139	1.4816	4.07526e-05	ERLEC1	endoplasmic reticulum lectin 1
7956031	9.14549	8.62151	-1.52322	4.3019e-05	ORMDL2	ORM1-like 2 (S. cerevisiae)
7940191	6.36803	5.24305	-2.17535	4.33278e-05	STX3	syntaxin 3
8135488	6.73732	7.42428	1.63442	4.37741e-05	LRRN3	leucine rich repeat neuronal 3
8160284	5.15312	6.27943	2.14596	4.42954e-05	HAUS6	HAUS augmin-like complex, subunit 6
7963575	9.67523	10.1664	1.38927	4.43697e-05	EIF4B	eukaryotic translation initiation factor 4B
8089011	4.76211	5.83068	2.4945	4.4782e-05	PROS1	protein S (alpha)
7904830	8.33532	7.56418	-1.52759	4.54992e-05	RNF115	ring finger protein 115
7920341	7.12444	7.78874	1.57041	4.64428e-05	GATAD2B	GATA zinc finger domain containing 2B
7913256	9.1487	9.65496	1.47045	4.65823e-05	DDOST	dolichyl-diphosphooligosaccharide--protein glycosyltransferase
7910124	10.2225	10.6281	1.3211	4.69651e-05	H3F3A	H3 histone, family 3A
8024238	9.62353	10.1583	1.39184	4.69966e-05	CIRBP	cold inducible RNA binding protein
8026954	6.23841	7.08453	1.70279	4.95704e-05	PIK3R2	phosphoinositide-3-kinase, regulatory subunit 2 (beta)
8016159	8.16756	8.88319	1.47521	4.96457e-05	DCAKD	dephospho-CoA kinase domain containing
8030158	7.51695	8.15585	1.52347	5.30554e-05	BAX	BCL2-associated X protein
7959078	10.779	11.0945	1.29038	5.31381e-05	---	---
8000537	5.76515	6.64513	1.82143	5.33351e-05	PDXDC2	pyridoxal-dependent decarboxylase domain containing 2
7914212	5.35023	6.27452	2.07629	5.56211e-05	SNORA61	small nucleolar RNA, H/ACA box 61
7958666	6.06701	4.93659	-2.3064	5.63957e-05	C12orf24	chromosome 12 open reading frame 24
8081001	5.50873	6.49373	1.9388	5.72699e-05	ROBO2	roundabout, axon guidance receptor, homolog 2 (Drosophila)
8132503	7.67011	6.92006	-1.61001	5.89564e-05	STK17A	serine/threonine kinase 17a
8097282	5.62539	6.51349	1.90066	5.92571e-05	SPRY1	sprouty homolog 1, antagonist of FGF signaling (Drosophila)
8130993	6.3731	7.06044	1.6876	6.024e-05	FAM20C	family with sequence similarity 20, member C
7949465	7.67309	6.84272	-1.6132	6.08599e-05	RELA	v-rel reticuloendotheliosis viral oncogene homolog A (avian)
7938544	8.49942	7.87939	-1.51595	6.12062e-05	TEAD1	TEA domain family member 1 (SV40 transcriptional enhancer factor)
7996954	7.48407	8.09214	1.52655	6.37236e-05	NFAT5	nuclear factor of activated T-cells 5, tonicity-responsive
7982620	7.46683	6.72602	-1.6409	6.40803e-05	EIF2AK4	eukaryotic translation initiation factor 2 alpha kinase 4
8014706	7.76795	8.40619	1.49605	6.40901e-05	PCGF2	polycomb group ring finger 2
8007561	8.8267	8.17842	-1.52078	6.42448e-05	G6PC3	glucose 6 phosphatase, catalytic, 3
8009796	6.29559	7.06361	1.69433	6.65385e-05	KIAA0195	KIAA0195
8017840	5.9027	6.72066	1.75724	6.67253e-05	LRRC37A4	leucine rich repeat containing 37, member A4 (pseudogene)
8026407	7.09139	6.33023	-1.72362	6.792e-05	SYDE1	synapse defective 1, Rho GTPase, homolog 1 (C. elegans)
8044499	7.87115	7.17802	-1.57231	6.81488e-05	SLC20A1	solute carrier family 20 (phosphate transporter), member 1
7939738	6.78336	7.48907	1.60224	6.95293e-05	DDB2	damage-specific DNA binding protein 2, 48kDa
8152215	5.6207	6.58906	1.88572	6.96461e-05	KLF10	Kruppel-like factor 10
8083352	10.357	9.96961	-1.33568	6.99772e-05	SELT	selenoprotein T
8161509	8.94782	9.412	1.46746	7.35877e-05	FRG1	FSHD region gene 1
8053417	6.98364	6.20449	-1.77508	7.57277e-05	CAPG	capping protein (actin filament), gelsolin-like
8062880	9.2971	9.88082	1.44256	7.57985e-05	YWHAB	tyrosine 3-monooxygenase/tryptophan 5-monooxygenase activation protein, beta polypeptide
8122720	7.05811	6.21114	-1.76782	7.63465e-05	ULBP2	UL16 binding protein 2
7950578	7.30058	6.59779	-1.66279	7.74309e-05	PAK1	p21 protein (Cdc42/Rac)-activated kinase 1
7929288	6.24456	5.18116	-2.2012	7.7777e-05	EXOC6	exocyst complex component 6
8109830	4.81773	6.25251	2.28251	7.80193e-05	CCDC99	coiled-coil domain containing 99
7984132	6.54457	7.21723	1.6434	7.96394e-05	USP3	ubiquitin specific peptidase 3
8166493	9.10502	9.57814	1.463	8.64802e-05	EIF2S3	eukaryotic translation initiation factor 2, subunit 3 gamma, 52kDa
8015196	6.76806	5.88482	-1.87639	8.82107e-05	KRTAP1-1	keratin associated protein 1-1
8019578	6.76806	5.88482	-1.87639	8.82107e-05	KRTAP1-1	keratin associated protein 1-1
7953385	12.273	11.9171	-1.26742	8.94987e-05	GAPDH	glyceraldehyde-3-phosphate dehydrogenase
8004247	7.57974	8.19652	1.50828	8.96125e-05	C17orf49	chromosome 17 open reading frame 49
7968370	4.68405	5.93141	2.50699	8.96903e-05	B3GALTL	beta 1,3-galactosyltransferase-like
8145766	5.25013	6.24497	2.1331	9.10279e-05	MST131	MSTP131
7940835	11.0477	10.6886	-1.29007	9.32537e-05	COX8A	cytochrome c oxidase subunit VIIIA (ubiquitous)
8049998	7.20282	7.88752	1.53683	9.35812e-05	TMEM18	transmembrane protein 18
8100145	6.78939	7.35526	1.61057	9.55799e-05	COMMD8	COMM domain containing 8
8133914	6.36804	7.11543	1.67177	9.63807e-05	DMTF1	cyclin D binding myb-like transcription factor 1
8149250	5.40505	6.44807	1.96139	9.64004e-05	SGK223	homolog of rat pragma of Rnd2
8061542	8.77981	8.22373	-1.51273	0.000101463	HM13	histocompatibility (minor) 13
7994095	6.22981	5.11231	-2.17625	0.000101707	UBFD1	ubiquitin family domain containing 1
8085263	9.08445	8.51088	-1.51488	0.000101909	TMEM111	transmembrane protein 111
7948744	7.88703	8.4831	1.48116	0.000101925	GANAB	glucosidase, alpha; neutral AB
8025035	7.1622	7.75979	1.55151	0.000102165	ALKBH7	alkB, alkylation repair homolog 7 (E. coli)
8118682	6.69854	7.42386	1.61263	0.000102608	PHF1	PHD finger protein 1
8161747	8.22779	7.62706	-1.51708	0.000102722	ZFAND5	zinc finger, AN1-type domain 5
8141395	4.57824	5.9145	2.48755	0.000103455	MCM7	minichromosome maintenance complex component 7
7979565	5.86749	6.72883	1.8079	0.00010353	WDR89	WD repeat domain 89
7959102	6.78228	5.71947	-1.8774	0.000105185	HSPB8	heat shock 22kDa protein 8
7937508	9.07467	8.506	-1.51148	0.000105222	CD151	CD151 molecule (Raph blood group)
7978644	7.45666	6.76465	-1.6212	0.000105517	NFKBIA	nuclear factor of kappa light polypeptide gene enhancer in B-cells inhibitor, alpha
8091658	6.08738	6.87371	1.71768	0.000105741	CCNL1	cyclin L1
8112570	6.2668	7.01562	1.68979	0.000107037	MRPS27	mitochondrial ribosomal protein S27
7946569	8.05072	8.63187	1.47019	0.000110385	RNF141	ring finger protein 141
8135594	10.4322	10.0247	-1.32638	0.000111537	CAV1	caveolin 1, caveolae protein, 22kDa
8149673	5.90256	6.74996	1.7829	0.00011267	REEP4	receptor accessory protein 4
8095826	6.08791	4.80917	-2.30013	0.000115954	STBD1	starch binding domain 1
8077899	6.77157	5.93581	-1.86541	0.000116595	PPARG	peroxisome proliferator-activated receptor gamma
8162777	6.32926	5.14165	-2.14708	0.000117368	GABBR2	gamma-aminobutyric acid (GABA) B receptor, 2
8160647	6.70087	7.41195	1.6113	0.000117633	BAG1	BCL2-associated athanogene
7986701	6.47771	7.18651	1.64883	0.00012087	HERC2P2	hect domain and RLD 2 pseudogene 2
8108403	7.39325	8.01722	1.52261	0.000123347	MATR3	matrin 3
8070655	7.56951	8.11452	1.50308	0.000123468	U2AF1	U2 small nuclear RNA auxiliary factor 1
7933723	6.17562	6.93789	1.70864	0.000128871	IPMK	inositol polyphosphate multikinase
7984989	8.2176	8.78738	1.4583	0.000129577	COMMD4	COMM domain containing 4
7982904	7.23029	7.80948	1.5423	0.000135083	RTF1	Rtf1, Paf1/RNA polymerase II complex component, homolog (S. cerevisiae)
7909142	9.30453	9.8058	1.43185	0.000135552	NUCKS1	nuclear casein kinase and cyclin-dependent kinase substrate 1
7981978	6.33617	7.01491	1.6912	0.000136566	SNORD116-15	small nucleolar RNA, C/D box 116-15
7951497	6.31897	6.98114	1.68009	0.000141051	NPAT	nuclear protein, ataxia-telangiectasia locus
7965359	7.4945	8.07043	1.50582	0.000141376	ATP2B1	ATPase, Ca++ transporting, plasma membrane 1
8027439	5.37789	6.30818	2.01082	0.000141445	ZNF507	zinc finger protein 507
7987279	4.86264	6.06809	2.32569	0.000146955	GOLGA8B	golgin A8 family, member B
7949383	6.95923	7.5648	1.57665	0.000150622	SYVN1	synovial apoptosis inhibitor 1, synoviolin
8042867	8.33028	8.82232	1.45423	0.000151533	WBP1	WW domain binding protein 1
7964360	7.11222	6.53218	-1.6738	0.000152403	STAT6	signal transducer and activator of transcription 6, interleukin-4 induced
8012197	7.42011	6.76281	-1.62399	0.000155658	PLSCR3	phospholipid scramblase 3
8035793	3.58662	5.43975	3.74879	0.000155927	ZNF737	zinc finger protein 737
7917728	7.05748	6.21528	-1.72652	0.000156817	FAM69A	family with sequence similarity 69, member A
8085206	6.6221	5.70777	-1.9467	0.000157825	CAMK1	calcium/calmodulin-dependent protein kinase I
7957715	5.51684	6.46532	1.92011	0.000159492	NEDD1	neural precursor cell expressed, developmentally down-regulated 1
7970301	6.90582	7.62265	1.5661	0.000167888	TMCO3	transmembrane and coiled-coil domains 3
7972828	4.82077	5.99872	2.29946	0.000169544	ANKRD10	ankyrin repeat domain 10
8157700	7.20074	7.83889	1.53983	0.000171987	RABGAP1	RAB GTPase activating protein 1
7981111	6.57837	7.282	1.62233	0.000178631	DICER1	dicer 1, ribonuclease type III
8059854	7.18694	6.41171	-1.67795	0.000192273	ARL4C	ADP-ribosylation factor-like 4C
7954469	7.26503	6.54875	-1.6455	0.000193324	RASSF8	Ras association (RalGDS/AF-6) domain family (N-terminal) member 8
7989628	6.03743	4.84953	-2.26271	0.000195148	CSNK1G1	casein kinase 1, gamma 1
7938528	9.79796	9.29311	-1.3965	0.000196436	PARVA	parvin, alpha
8066009	8.64286	9.17667	1.44879	0.000197137	RBM39	RNA binding motif protein 39
8145914	7.77803	7.13355	-1.54825	0.000200276	BAG4	BCL2-associated athanogene 4
8142407	5.34479	6.31257	2.02424	0.000200379	TMEM168	transmembrane protein 168
8167924	7.7427	7.11546	-1.56286	0.000204426	UBQLN2	ubiquilin 2
8102800	9.17182	8.61827	-1.49821	0.000205846	SLC7A11	solute carrier family 7, (cationic amino acid transporter, y+ system) member 11
8108127	7.45782	8.02972	1.50798	0.000206208	CAMLG	calcium modulating ligand
8009457	8.99829	9.50061	1.45077	0.000207728	PRKAR1A	protein kinase, cAMP-dependent, regulatory, type I, alpha (tissue specific extinguisher 1)
7988921	7.1019	6.44204	-1.68708	0.000208693	MYO5A	myosin VA (heavy chain 12, myoxin)
7999889	8.06646	7.51967	-1.51823	0.000210986	GDE1	glycerophosphodiester phosphodiesterase 1
8120251	7.40162	6.58036	-1.62727	0.000214218	FBXO9	F-box protein 9
7954065	9.26532	8.7254	-1.4818	0.000217219	GPRC5A	G protein-coupled receptor, family C, group 5, member A
8156982	5.72934	6.49137	1.81773	0.000217401	SMC2	structural maintenance of chromosomes 2
7975747	7.6051	6.95035	-1.58344	0.000220481	DLST	dihydrolipoamide S-succinyltransferase (E2 component of 2-oxo-glutarate complex)
7930304	9.00224	8.41829	-1.50077	0.000226171	GSTO1	glutathione S-transferase omega 1
8110032	4.927	6.18298	2.26665	0.000229525	C5orf41	chromosome 5 open reading frame 41
8147573	4.69595	5.97893	2.52039	0.000233759	OSR2	odd-skipped related 2 (Drosophila)
8003410	6.32703	7.12265	1.63835	0.000237996	GALNS	galactosamine (N-acetyl)-6-sulfate sulfatase
8028248	5.34213	6.4214	2.01694	0.000242639	ZNF570	zinc finger protein 570
7977075	4.5551	5.93787	2.63815	0.000246304	SNORA28	small nucleolar RNA, H/ACA box 28
8142770	5.79609	6.5627	1.79392	0.000250788	MGC27345	hypothetical protein MGC27345
8089464	4.06965	5.51158	3.36804	0.000254734	LOC151760	hypothetical LOC151760
8097600	8.16878	8.72472	1.45055	0.000255669	SMARCA5	SWI/SNF related, matrix associated, actin dependent regulator of chromatin, subfamily a, member 5
8087935	6.99729	7.57797	1.55272	0.000256849	NT5DC2	5'-nucleotidase domain containing 2
8119169	4.86984	5.94102	2.21848	0.000260987	TBC1D22B	TBC1 domain family, member 22B
8008151	6.54613	7.25759	1.62028	0.000260988	IGF2BP1	insulin-like growth factor 2 mRNA binding protein 1
7928671	6.51349	7.31299	1.61628	0.000262381	C10orf57	chromosome 10 open reading frame 57
7978123	8.9166	8.32133	-1.49648	0.00026328	PSME2	proteasome (prosome, macropain) activator subunit 2 (PA28 beta)
7946728	8.41282	7.90247	-1.48865	0.000263575	PSMA1	proteasome (prosome, macropain) subunit, alpha type, 1
8080923	9.812	9.30271	-1.38571	0.000268702	PSMC1	proteasome (prosome, macropain) 26S subunit, ATPase, 1
8128565	6.55873	5.31055	-2.03581	0.000269103	POPDC3	popeye domain containing 3
8112940	7.2691	7.88584	1.51854	0.000269126	SSBP2	single-stranded DNA binding protein 2
8124459	4.82926	5.98921	2.31403	0.00027406	ZNF322A	zinc finger protein 322A
7922343	7.28343	6.52095	-1.63878	0.000277159	TNFSF4	tumor necrosis factor (ligand) superfamily, member 4
7926531	7.00678	7.61642	1.55292	0.000283475	ARL5B	ADP-ribosylation factor-like 5B
8006531	8.66377	8.03656	-1.48796	0.000292408	SLFN5	schlafen family member 5
8167790	7.48114	8.08182	1.49456	0.000298408	TSR2	TSR2, 20S rRNA accumulation, homolog (S. cerevisiae)
7907439	11.2034	10.7836	-1.27018	0.000307125	PRDX6	peroxiredoxin 6
7955646	9.10939	9.67043	1.44011	0.000307861	EIF4B	eukaryotic translation initiation factor 4B
8113083	6.55118	7.26491	1.61045	0.000312113	FAM172A	family with sequence similarity 172, member A
8030133	7.58678	8.17042	1.48567	0.000314079	NUCB1	nucleobindin 1
7993185	6.23314	6.88416	1.67076	0.000314282	NUBP1	nucleotide binding protein 1 (MinD homolog, E. coli)
8124469	5.13141	6.22216	2.10089	0.000321224	GUSBP3	glucuronidase, beta pseudogene 3
7937485	7.16621	6.48868	-1.65794	0.000327893	PNPLA2	patatin-like phospholipase domain containing 2
8027297	5.13725	6.25533	2.11495	0.000328742	ZNF738	zinc finger protein 738
8115181	6.56453	7.40555	1.59431	0.000333133	DCTN4	dynactin 4 (p62)
8158424	6.88688	6.01283	-1.76467	0.000340047	LRRC8A	leucine rich repeat containing 8 family, member A
8084064	7.15167	6.46892	-1.65081	0.000348096	MTHFD2	methylenetetrahydrofolate dehydrogenase (NADP+ dependent) 2, methenyltetrahydrofolate cyclohydrolase
8102831	9.07667	8.48864	-1.48957	0.000352967	C4orf49	chromosome 4 open reading frame 49
7995583	6.99638	7.67257	1.54196	0.000367366	CHD9	chromodomain helicase DNA binding protein 9
8114618	9.40191	9.90424	1.40381	0.000370946	NDUFA2	NADH dehydrogenase (ubiquinone) 1 alpha subcomplex, 2, 8kDa
8148333	7.41953	6.6847	-1.60537	0.000371128	EFR3A	EFR3 homolog A (S. cerevisiae)
8035847	4.01633	5.66489	3.2576	0.00037119	ZNF675	zinc finger protein 675
8157941	5.26746	6.1078	2.04894	0.000372694	ZBTB34	zinc finger and BTB domain containing 34
8152453	5.77253	6.59644	1.77385	0.000389336	TRPS1	trichorhinophalangeal syndrome I
8031483	10.1651	10.5184	1.30581	0.000391925	RPL28	ribosomal protein L28
8171435	6.14032	5.00037	-2.17291	0.000397777	PIR	pirin (iron-binding nuclear protein)
7995825	6.67565	5.90215	-1.84896	0.000403575	MT1F	metallothionein 1F
7932209	6.88469	5.92739	-1.75609	0.000406496	---	---
7909283	5.39602	6.33734	1.92131	0.000406724	YOD1	YOD1 OTU deubiquinating enzyme 1 homolog (S. cerevisiae)
8110166	9.04279	9.57665	1.43803	0.000416985	HIGD2A	HIG1 hypoxia inducible domain family, member 2A
8118310	7.97892	7.41303	-1.5165	0.000419939	HSPA1A	heat shock 70kDa protein 1A
7918517	7.7087	7.07347	-1.54888	0.000423067	WDR77	WD repeat domain 77
8038382	7.10807	7.61897	1.54204	0.000425033	PIH1D1	PIH1 domain containing 1
8105499	8.42155	7.73882	-1.47972	0.000437451	NDUFAF2	NADH dehydrogenase (ubiquinone) 1 alpha subcomplex, assembly factor 2
8087874	8.00046	8.58805	1.44634	0.000438753	WDR82	WD repeat domain 82
7981032	8.10892	8.5768	1.44648	0.000447384	DDX24	DEAD (Asp-Glu-Ala-Asp) box polypeptide 24
8053484	6.68905	7.40466	1.57895	0.000449808	ST3GAL5	ST3 beta-galactoside alpha-2,3-sialyltransferase 5
7923426	6.23226	7.0138	1.66605	0.000460484	UBE2T	ubiquitin-conjugating enzyme E2T (putative)
8081241	6.25477	6.92581	1.66022	0.000461431	C3orf26	chromosome 3 open reading frame 26
7997336	5.78738	6.4683	1.83506	0.000470936	VAT1L	vesicle amine transport protein 1 homolog (T. californica)-like
8160559	6.2224	5.21821	-2.09798	0.000475694	DDX58	DEAD (Asp-Glu-Ala-Asp) box polypeptide 58
7997025	6.6567	7.26011	1.59068	0.000476825	PDPR	pyruvate dehydrogenase phosphatase regulatory subunit
8001666	8.05635	8.60647	1.44458	0.000477017	CSNK2A2	casein kinase 2, alpha prime polypeptide
7947221	7.96924	7.37619	-1.51488	0.000479033	LIN7C	lin-7 homolog C (C. elegans)
8163784	7.07608	6.33778	-1.66703	0.000484804	FBXW2	F-box and WD repeat domain containing 2
7958800	6.17758	6.92475	1.67022	0.000485502	MAPKAPK5	mitogen-activated protein kinase-activated protein kinase 5
7978997	7.75475	7.05693	-1.54323	0.000499587	MAP4K5	mitogen-activated protein kinase kinase kinase kinase 5
7928318	6.60261	5.62499	-1.89213	0.000506687	CCDC109A	coiled-coil domain containing 109A
8081612	5.05154	6.21161	2.09678	0.000509579	ABHD10	abhydrolase domain containing 10
8130211	5.30522	6.29484	1.97009	0.000513983	SYNE1	spectrin repeat containing, nuclear envelope 1
7925174	8.37861	8.89294	1.43363	0.000518007	TOMM20	translocase of outer mitochondrial membrane 20 homolog (yeast)
7959473	7.78628	7.24429	-1.53599	0.000521338	DENR	density-regulated protein
7949503	9.07454	8.48795	-1.48304	0.0005221	EFEMP2	EGF-containing fibulin-like extracellular matrix protein 2
8073578	7.15029	6.34383	-1.658	0.000540155	C22orf32	chromosome 22 open reading frame 32
8179322	7.9533	7.37508	-1.51463	0.000541116	HSPA1A	heat shock 70kDa protein 1A
8050591	8.26984	7.70097	-1.48052	0.000541466	NDUFAF2	NADH dehydrogenase (ubiquinone) 1 alpha subcomplex, assembly factor 2
8038962	5.61714	6.523	1.80755	0.000547132	ZNF836 // ZNF836 // ZNF836	zinc finger protein 836 // zinc finger protein 836 // zinc finger protein 836
7954613	6.93713	7.48546	1.55067	0.000551717	CCDC91	coiled-coil domain containing 91
8010804	6.30522	7.03291	1.63663	0.000554864	NARF	nuclear prelamin A recognition factor
7941927	6.07364	6.81205	1.71607	0.000555544	AIP	aryl hydrocarbon receptor interacting protein
7937915	6.96848	7.61797	1.54419	0.000562146	RRM1	ribonucleotide reductase M1
8091446	9.49971	8.95186	-1.43657	0.000575108	PFN2	profilin 2
7983663	6.67741	7.38143	1.58229	0.000595572	USP8	ubiquitin specific peptidase 8
7948696	7.25812	7.89926	1.5014	0.000597668	MTA2	metastasis associated 1 family, member 2
8002143	5.50972	6.45846	1.86734	0.000599539	LCAT	lecithin-cholesterol acyltransferase
7927669	6.74895	7.41671	1.57175	0.000610691	TFAM	transcription factor A, mitochondrial
7962441	7.89188	8.5187	1.44758	0.000612586	TWF1	twinfilin, actin-binding protein, homolog 1 (Drosophila)
8170097	5.72118	6.53801	1.80169	0.000613307	SLC9A6	solute carrier family 9 (sodium/hydrogen exchanger), member 6
8034920	5.69046	6.53486	1.78854	0.000614284	ILVBL	ilvB (bacterial acetolactate synthase)-like
7935027	7.56215	6.85941	-1.5604	0.000620668	IDE	insulin-degrading enzyme
8083876	5.96844	6.76713	1.72181	0.000630794	SKIL	SKI-like oncogene
8016847	7.24414	7.80522	1.50754	0.000635277	TRIM25	tripartite motif-containing 25
8095986	6.43491	5.46372	-1.96207	0.000641246	ANXA3	annexin A3
7974653	5.41003	6.15664	1.91606	0.000644132	KIAA0586	KIAA0586
8072407	8.6916	8.1392	-1.47396	0.000650542	TUG1	taurine upregulated 1 (non-protein coding)
7944991	9.25988	9.76684	1.41331	0.000651847	STT3A	STT3, subunit of the oligosaccharyltransferase complex, homolog A (S. cerevisiae)
7936529	5.95542	6.79809	1.69946	0.000654483	KIAA1598	KIAA1598
8041383	10.0079	10.4317	1.31423	0.000657041	LTBP1	latent transforming growth factor beta binding protein 1
8108861	6.60983	5.71778	-1.87481	0.000661645	NDFIP1	Nedd4 family interacting protein 1
8098263	6.2227	5.16633	-2.07449	0.000667952	PALLD	palladin, cytoskeletal associated protein
8053909	7.48374	8.00608	1.48002	0.000684995	SNRNP200	small nuclear ribonucleoprotein 200kDa (U5)
7954407	7.86979	7.22936	-1.5189	0.00071086	CMAS	cytidine monophosphate N-acetylneuraminic acid synthetase
8067380	5.28863	6.22541	1.97432	0.000722804	LSM14B	LSM14B, SCD6 homolog B (S. cerevisiae)
8123695	7.23623	6.563	-1.6244	0.000728842	PECI	peroxisomal D3,D2-enoyl-CoA isomerase
8066214	8.5013	9.07802	1.42681	0.000749845	TGM2	transglutaminase 2 (C polypeptide, protein-glutamine-gamma-glutamyltransferase)
8076511	11.5605	11.8475	1.22952	0.000758056	RPL5	ribosomal protein L5
7990487	6.21946	6.81553	1.65425	0.000760697	SIN3A	SIN3 homolog A, transcription regulator (yeast)
8024792	6.03495	5.04212	-2.10952	0.000771908	EBI3	Epstein-Barr virus induced 3
8163896	9.20132	9.69539	1.41726	0.000775614	STOM	stomatin
8090737	5.88017	6.65837	1.73128	0.000775717	NPHP3	nephronophthisis 3 (adolescent)
7939242	9.30459	8.77073	-1.45754	0.000783854	CAPRIN1	cell cycle associated protein 1
7985605	6.0982	6.83295	1.68445	0.000788458	ZNF592	zinc finger protein 592
8160011	6.53097	7.16205	1.59861	0.000790218	KIAA2026	KIAA2026
8105348	8.85265	8.24045	-1.47399	0.000790333	GPX8	glutathione peroxidase 8 (putative)
8051882	7.4927	8.01895	1.47826	0.00080478	LRPPRC	leucine-rich PPR-motif containing
8051573	9.03493	8.481	-1.47417	0.000816353	CDC42EP3	CDC42 effector protein (Rho GTPase binding) 3
7987361	6.38329	6.97691	1.62785	0.000828269	ZNF770	zinc finger protein 770
8154305	10.0632	9.5985	-1.33624	0.000829797	SELT	selenoprotein T
7923034	4.32063	5.85712	2.8558	0.000834682	B3GALT2	UDP-Gal:betaGlcNAc beta 1,3-galactosyltransferase, polypeptide 2
8132539	6.75677	6.0437	-1.74244	0.000850717	DBNL	drebrin-like
7949674	6.66723	7.2744	1.5796	0.00087023	RBM4B	RNA binding motif protein 4B
7944195	7.4949	8.11965	1.47288	0.000870888	UBE4A	ubiquitination factor E4A (UFD2 homolog, yeast)
8016546	5.07805	6.02128	2.10824	0.000880605	ZNF652	zinc finger protein 652
8045514	5.36585	6.38659	1.89485	0.0008852	SPOPL	speckle-type POZ protein-like
8046346	6.69269	7.38686	1.56554	0.000888403	HAT1	histone acetyltransferase 1
7976189	9.77909	9.25866	-1.37339	0.000922786	PSMC1	proteasome (prosome, macropain) 26S subunit, ATPase, 1
7911422	7.02335	7.53499	1.53396	0.000929028	SDF4	stromal cell derived factor 4
8017688	6.24799	6.93468	1.62907	0.000932836	LRRC37A3	leucine rich repeat containing 37, member A3
8096004	7.30304	6.73432	-1.59609	0.00093666	BMP2K	BMP2 inducible kinase
7928679	6.2906	5.12511	-2.0525	0.000941632	PLAC9	placenta-specific 9
7994006	7.64773	8.22673	1.46125	0.000941843	SMG1	SMG1 homolog, phosphatidylinositol 3-kinase-related kinase (C. elegans)
8035842	6.49883	7.06584	1.60097	0.000949289	ZNF91	zinc finger protein 91
7922793	9.18499	8.71673	-1.46018	0.000963888	ARPC5	actin related protein 2/3 complex, subunit 5, 16kDa
8047059	9.8853	10.2467	1.32293	0.00096683	HNRNPC	heterogeneous nuclear ribonucleoprotein C (C1/C2)
8134263	10.9527	11.2711	1.25087	0.000973416	COL1A2	collagen, type I, alpha 2
8140500	7.92371	8.48081	1.43925	0.000998426	TMEM60	transmembrane protein 60
7963046	10.4689	10.0989	-1.2982	0.000999858	TUBA1B	tubulin, alpha 1b
7960865	9.73917	9.27419	-1.37273	0.0010265	SLC2A3	solute carrier family 2 (facilitated glucose transporter), member 3
8055104	7.4192	6.80797	-1.56217	0.00102719	SAP130	Sin3A-associated protein, 130kDa
7986520	6.50692	7.39391	1.57234	0.00103014	C15orf51	dynamin 1 pseudogene
8099364	6.29373	6.93168	1.63214	0.00103704	ZNF518B	zinc finger protein 518B
8158671	8.1943	7.69592	-1.46855	0.00104072	ASS1	argininosuccinate synthase 1
8048733	7.24832	6.62121	-1.59877	0.00104682	ACSL3	acyl-CoA synthetase long-chain family member 3
8052698	7.77118	8.23583	1.45311	0.00104775	C1D	C1D nuclear receptor co-repressor
7906863	8.4139	7.86847	-1.46011	0.00106343	UAP1	UDP-N-acteylglucosamine pyrophosphorylase 1
8145272	6.38553	7.06341	1.60015	0.00108437	R3HCC1	R3H domain and coiled-coil containing 1
8027604	6.14914	6.90415	1.63713	0.00108554	KIAA0355	KIAA0355
8109305	6.16584	5.01357	-2.09495	0.0010859	SYNPO	synaptopodin
7961083	5.40823	6.2176	1.90455	0.00111088	CLEC2B	C-type lectin domain family 2, member B
8034097	5.00838	6.19275	1.9564	0.00111515	LOC147727	hypothetical LOC147727
7900413	8.44077	7.9356	-1.45871	0.00111984	ZMPSTE24	zinc metallopeptidase (STE24 homolog, S. cerevisiae)
8003611	7.69687	6.98084	-1.53861	0.00112379	FAM57A	family with sequence similarity 57, member A
8172538	7.02191	6.44014	-1.63256	0.00112641	WDR45	WD repeat domain 45
8095574	5.37677	6.29741	1.91771	0.00113356	DCK	deoxycytidine kinase
8125059	10.5892	10.1997	-1.29005	0.00115321	CLIC1	chloride intracellular channel 1
8031690	5.73031	6.64445	1.78063	0.00116133	ZNF264	zinc finger protein 264
8004671	5.21875	6.22532	1.95493	0.00116146	KDM6B	lysine (K)-specific demethylase 6B
7998119	6.21773	6.94535	1.63651	0.00119825	WASH1	WAS protein family homolog 1
8140814	5.42417	6.19138	1.93469	0.00123114	SLC25A40	solute carrier family 25, member 40
8117955	7.39523	8.08617	1.46796	0.00123378	MRPS18B	mitochondrial ribosomal protein S18B
8177824	7.39523	8.08617	1.46796	0.00123378	MRPS18B	mitochondrial ribosomal protein S18B
8179139	7.39523	8.08617	1.46796	0.00123378	MRPS18B	mitochondrial ribosomal protein S18B
8160088	6.09282	6.77884	1.65664	0.00127255	MPDZ	multiple PDZ domain protein
7943803	6.10413	5.07448	-2.07251	0.00127765	DIXDC1	DIX domain containing 1
7944096	6.04662	6.89155	1.67303	0.00129143	RNF214	ring finger protein 214
8159249	7.74741	8.2894	1.44867	0.00129782	MRPS2	mitochondrial ribosomal protein S2
8064581	5.10974	6.1271	2.03828	0.00129844	FASTKD5	FAST kinase domains 5
8120833	6.35978	5.42322	-1.94238	0.00129854	SH3BGRL2	SH3 domain binding glutamic acid-rich protein like 2
7928589	7.29137	6.68914	-1.58652	0.00138363	PPIF	peptidylprolyl isomerase F
7952557	8.12627	7.51086	-1.47327	0.00139187	SRPR	signal recognition particle receptor (docking protein)
8064967	5.26131	6.11752	1.97577	0.00143869	MKKS	McKusick-Kaufman syndrome
7897620	8.81711	8.22254	-1.46064	0.00144534	PGD	phosphogluconate dehydrogenase
8160981	6.79184	6.01937	-1.72416	0.00146235	KIAA1539	KIAA1539
7912481	7.13986	7.82047	1.4949	0.00146684	MAD2L2	MAD2 mitotic arrest deficient-like 2 (yeast)
7902435	7.60564	6.99628	-1.53646	0.00149225	TPI1	triosephosphate isomerase 1
7969574	7.82411	7.21478	-1.51757	0.00149239	MIR622	microRNA 622
8080438	9.98279	10.4189	1.30708	0.00150996	SPCS1	signal peptidase complex subunit 1 homolog (S. cerevisiae)
7973918	7.79183	6.98119	-1.50673	0.00152292	FAM177A1	family with sequence similarity 177, member A1
8112469	4.73896	5.95261	2.32677	0.00154255	GUSBP3	glucuronidase, beta pseudogene 3
8167573	6.53859	5.70957	-1.8592	0.00154913	GAGE1	G antigen 1
7900979	6.18976	6.91386	1.63458	0.00155008	RNF220	ring finger protein 220
7917741	8.41876	7.87413	-1.45264	0.00155641	TMED5	transmembrane emp24 protein transport domain containing 5
7991374	7.1588	6.47519	-1.60986	0.00156017	IDH2	isocitrate dehydrogenase 2 (NADP+), mitochondrial
8117580	5.76585	6.4487	1.75391	0.00158825	HIST1H2AI	histone cluster 1, H2ai
8015635	8.02802	7.44438	-1.47604	0.00158989	PTRF	polymerase I and transcript release factor
8114778	6.93053	7.59266	1.51434	0.00160318	GCSH	glycine cleavage system protein H (aminomethyl carrier)
7916282	6.03104	5.00438	-2.11773	0.00160778	LRP8	low density lipoprotein receptor-related protein 8, apolipoprotein e receptor
8155707	7.00295	6.27649	-1.66213	0.00161745	TJP2	tight junction protein 2 (zona occludens 2)
8115210	6.65972	5.76812	-1.79192	0.00161849	TNIP1	TNFAIP3 interacting protein 1
8135876	8.85111	9.32915	1.4165	0.00164471	SND1	staphylococcal nuclease and tudor domain containing 1
8140398	8.0649	7.50698	-1.47371	0.00164742	YWHAG	tyrosine 3-monooxygenase/tryptophan 5-monooxygenase activation protein, gamma polypeptide
8078405	6.88881	6.07062	-1.70488	0.00165661	CMTM7	CKLF-like MARVEL transmembrane domain containing 7
7923798	9.18043	9.62859	1.40781	0.00167845	NUCKS1	nuclear casein kinase and cyclin-dependent kinase substrate 1
8019316	6.04436	6.82292	1.66171	0.00167951	PYCR1	pyrroline-5-carboxylate reductase 1
8152096	9.91588	9.4957	-1.34548	0.00169321	YWHAZ	tyrosine 3-monooxygenase/tryptophan 5-monooxygenase activation protein, zeta polypeptide
7917482	6.69999	6.05885	-1.72946	0.00172719	CCBL2	cysteine conjugate-beta lyase 2
8064438	7.76933	7.13098	-1.51554	0.00173517	NSFL1C	NSFL1 (p97) cofactor (p47)
7929032	7.84426	7.30446	-1.49395	0.00175162	FAS	Fas (TNF receptor superfamily, member 6)
8139198	6.95158	6.1571	-1.65733	0.00176971	RWDD4A	RWD domain containing 4A
8003953	10.3247	9.94323	-1.29999	0.00178255	PSMB6	proteasome (prosome, macropain) subunit, beta type, 6
7978260	6.81714	5.91799	-1.72582	0.00179399	DHRS1	dehydrogenase/reductase (SDR family) member 1
8004832	6.63924	5.80783	-1.78361	0.00179652	RANGRF	RAN guanine nucleotide release factor
7984217	6.73631	6.03527	-1.76458	0.00179772	PLEKHO2	pleckstrin homology domain containing, family O member 2
8044450	4.78068	5.87889	2.31931	0.00183742	ZC3H6	zinc finger CCCH-type containing 6
7900510	6.67665	5.86296	-1.7875	0.00183844	CTPS	CTP synthase
7917148	8.36553	7.66527	-1.4516	0.00184127	AIDA	axin interactor, dorsalization associated
7950086	6.38562	7.02667	1.59714	0.00184342	NUMA1	nuclear mitotic apparatus protein 1
7990582	5.31228	6.22589	1.88961	0.00184703	SCAPER	S-phase cyclin A-associated protein in the ER
7993404	6.72634	7.43251	1.54301	0.00184739	NPIP	nuclear pore complex interacting protein
8017711	7.01078	6.32556	-1.6394	0.00187681	GNA13	guanine nucleotide binding protein (G protein), alpha 13
8125713	7.25605	7.79963	1.48236	0.00192834	TAPBP	TAP binding protein (tapasin)
8002729	8.75327	9.24289	1.4131	0.00193631	GLG1	golgi glycoprotein 1
7912157	7.74328	7.22798	-1.50405	0.00194719	ERRFI1	ERBB receptor feedback inhibitor 1
8147848	5.52889	6.23035	1.8867	0.00198564	OXR1	oxidation resistance 1
8085660	8.69273	8.22593	-1.4506	0.00201292	DPH3	DPH3, KTI11 homolog (S. cerevisiae)
8062293	7.97601	7.39433	-1.48104	0.0020156	DLGAP4	discs, large (Drosophila) homolog-associated protein 4
8058373	7.07696	7.63235	1.50641	0.00203206	WDR12	WD repeat domain 12
7923386	6.37176	5.45715	-1.92035	0.00203911	LMOD1	leiomodin 1 (smooth muscle)
8084016	6.96555	6.22477	-1.66503	0.00208785	PIK3CA	phosphoinositide-3-kinase, catalytic, alpha polypeptide
8103881	6.96839	6.18315	-1.64062	0.00209106	RWDD4A	RWD domain containing 4A
7993281	6.58224	5.80429	-1.8179	0.00209552	SNX29	sorting nexin 29
7980146	10.1291	10.5005	1.28771	0.00209905	NPC2	Niemann-Pick disease, type C2
7986509	6.45513	7.28981	1.57039	0.00212224	C15orf51	dynamin 1 pseudogene
7986512	6.45513	7.28981	1.57039	0.00212224	LOC100289668	similar to dynamin 1
7986527	6.45513	7.28981	1.57039	0.00212224	LOC100289668	similar to dynamin 1
8088478	9.43822	9.95337	1.37063	0.00216768	---	---
7981046	10.4901	10.1847	-1.28501	0.00218767	IFI27L2	interferon, alpha-inducible protein 27-like 2
8026007	7.11332	7.70895	1.49265	0.00218843	ZNF791	zinc finger protein 791
8165024	4.99033	6.06629	2.06433	0.00222038	C9orf116	chromosome 9 open reading frame 116
7906919	5.58062	6.4895	1.76595	0.00227374	RGS4	regulator of G-protein signaling 4
7961767	4.95709	6.01004	2.09176	0.00227761	KIAA0528	KIAA0528
8136248	8.08929	7.53003	-1.46528	0.00227796	MEST	mesoderm specific transcript homolog (mouse)
7959123	6.98879	7.53408	1.51887	0.00228736	PRKAB1	protein kinase, AMP-activated, beta 1 non-catalytic subunit
7957540	7.60608	8.06297	1.45036	0.00231862	MRPL42	mitochondrial ribosomal protein L42
8147469	6.6655	7.29348	1.5523	0.0023353	PGCP	plasma glutamate carboxypeptidase
8103630	7.08714	6.43938	-1.60591	0.00235893	SH3RF1	SH3 domain containing ring finger 1
8122909	7.0334	7.63374	1.5017	0.00236936	RBM16	RNA binding motif protein 16
8108166	8.8996	8.34447	-1.45284	0.00238172	TXNDC15	thioredoxin domain containing 15
8175256	6.88625	7.50109	1.52202	0.0023906	MGC16121	hypothetical protein MGC16121
8162850	6.41454	6.99269	1.58352	0.00242107	TEX10	testis expressed 10
7997489	10.1164	10.5209	1.28651	0.00244053	---	---
8162276	6.95347	6.33644	-1.65929	0.00245959	NFIL3	nuclear factor, interleukin 3 regulated
8112592	7.18639	6.5937	-1.58953	0.00247181	FOXD1	forkhead box D1
7981387	7.25383	7.78751	1.47912	0.00249399	CDC42BPB	CDC42 binding protein kinase beta (DMPK-like)
7898278	6.0045	6.72905	1.6585	0.00254892	SPEN	spen homolog, transcriptional regulator (Drosophila)
7940479	5.30327	6.16688	1.92475	0.00265307	TMEM216	transmembrane protein 216
7923007	5.75188	6.39942	1.73147	0.00272683	UCHL5	ubiquitin carboxyl-terminal hydrolase L5
8157264	7.05835	6.36997	-1.62472	0.00276246	SLC31A2	solute carrier family 31 (copper transporters), member 2
7962895	6.83665	6.15015	-1.68979	0.00277664	FKBP11	FK506 binding protein 11, 19 kDa
7978335	6.08171	6.80419	1.64415	0.00278361	SDR39U1	short chain dehydrogenase/reductase family 39U, member 1
7922095	8.27249	7.74118	-1.44607	0.00279835	BRP44	brain protein 44
8047174	7.29382	6.66354	-1.56715	0.00280902	SLC39A10	solute carrier family 39 (zinc transporter), member 10
8024623	8.58569	8.15467	-1.44221	0.0028182	NFIC	nuclear factor I/C (CCAAT-binding transcription factor)
7986765	10.8078	11.1246	1.24994	0.00284819	RPL5	ribosomal protein L5
8029437	8.0811	7.59613	-1.45789	0.00285217	PVR	poliovirus receptor
8113914	6.88193	7.52499	1.52373	0.0028666	FNIP1	folliculin interacting protein 1
7994756	7.71499	8.11157	1.43921	0.00289335	PPP4C	protein phosphatase 4, catalytic subunit
8037847	9.84706	9.43539	-1.34634	0.00291128	AP2S1	adaptor-related protein complex 2, sigma 1 subunit
8027285	5.22755	6.21597	1.93541	0.00291792	ZNF714	zinc finger protein 714
7924923	5.91561	6.59593	1.6739	0.00292584	NUP133	nucleoporin 133kDa
8065868	9.28059	8.88635	-1.42257	0.00292677	EIF6	eukaryotic translation initiation factor 6
8108905	4.1968	5.85299	2.74075	0.002952	KCTD16	potassium channel tetramerisation domain containing 16
8001350	7.21557	7.71538	1.48067	0.00295586	BRD7	bromodomain containing 7
8037835	8.21322	7.69997	-1.44688	0.00296289	SLC1A5	solute carrier family 1 (neutral amino acid transporter), member 5
8147447	7.50011	6.89992	-1.53115	0.00299392	PTDSS1	phosphatidylserine synthase 1
8107897	7.50973	6.91651	-1.52993	0.00300236	PDLIM4	PDZ and LIM domain 4
8117237	6.73235	5.83428	-1.77929	0.0030361	---	---
7919584	5.67666	6.48843	1.73772	0.00307053	HIST2H2BF	histone cluster 2, H2bf
7989013	7.45025	7.96446	1.45002	0.00317136	RSL24D1	ribosomal L24 domain containing 1
8142096	6.61263	7.11827	1.55498	0.00319042	ATXN7L1	ataxin 7-like 1
8073214	5.614	6.44846	1.76135	0.00323021	TNRC6B	trinucleotide repeat containing 6B
7991216	5.43747	6.25539	1.83733	0.00330465	DET1	de-etiolated homolog 1 (Arabidopsis)
8143367	6.26739	5.27676	-1.95564	0.00330704	SLC37A3	solute carrier family 37 (glycerol-3-phosphate transporter), member 3
7929919	7.11944	6.50163	-1.5952	0.0033445	SFXN3	sideroflexin 3
7949496	10.5627	10.2021	-1.27849	0.00337111	CFL1	cofilin 1 (non-muscle)
8087433	5.62033	6.3998	1.76733	0.00342557	NICN1	nicolin 1
7953351	5.25695	6.14924	1.90477	0.00343958	NCAPD2	non-SMC condensin I complex, subunit D2
8122672	7.68531	6.98609	-1.50612	0.00346488	TAB2	TGF-beta activated kinase 1/MAP3K7 binding protein 2
8135734	7.93618	7.33562	-1.47478	0.00346603	C7orf58	chromosome 7 open reading frame 58
8109999	8.65414	8.16654	-1.43838	0.00348961	ERGIC1	endoplasmic reticulum-golgi intermediate compartment (ERGIC) 1
8096314	7.36215	6.70317	-1.55799	0.00350781	PKD2	polycystic kidney disease 2 (autosomal dominant)
8156295	6.61233	7.36813	1.54598	0.00351753	SECISBP2	SECIS binding protein 2
8177544	4.70345	5.88229	2.33278	0.00355368	GUSBP3	glucuronidase, beta pseudogene 3
8082066	7.91872	8.42652	1.41601	0.00367263	FAM162A	family with sequence similarity 162, member A
8093230	7.10507	6.51993	-1.58912	0.00368413	KIAA0226	KIAA0226
8043718	8.8886	9.37525	1.40319	0.00369443	COX5B	cytochrome c oxidase subunit Vb
8157890	6.10966	6.77385	1.63103	0.00371543	PBX3	pre-B-cell leukemia homeobox 3
8019238	6.89767	7.40701	1.51034	0.00373109	C17orf90	chromosome 17 open reading frame 90
8004271	7.30448	6.59511	-1.56606	0.00377175	ACADVL	acyl-CoA dehydrogenase, very long chain
8044236	7.09086	7.67336	1.48562	0.00382943	GCC2	GRIP and coiled-coil domain containing 2
7979813	9.57292	9.12979	-1.38472	0.00391805	ZFP36L1	zinc finger protein 36, C3H type-like 1
8084423	7.81094	7.3459	-1.47769	0.00392541	PSMD2	proteasome (prosome, macropain) 26S subunit, non-ATPase, 2
8047641	5.75305	6.60333	1.72898	0.00402931	CYP20A1	cytochrome P450, family 20, subfamily A, polypeptide 1
7942476	6.02317	6.81796	1.62988	0.00413727	PAAF1	proteasomal ATPase-associated factor 1
7986541	5.89982	6.61733	1.68174	0.00418034	WASH3P	WAS protein family homolog 3 pseudogene
7999149	6.06371	6.70767	1.63366	0.00422322	NMRAL1	NmrA-like family domain containing 1
8154059	6.00849	6.77637	1.64872	0.00426478	SMARCA2	SWI/SNF related, matrix associated, actin dependent regulator of chromatin, subfamily a, member 2
7957032	5.25873	6.18262	1.89009	0.00430077	YEATS4	YEATS domain containing 4
8030064	4.65809	5.94565	2.26811	0.00431387	CYTH2	cytohesin 2
8047763	7.52777	8.09113	1.43985	0.00437323	---	---
7966851	7.30001	6.63118	-1.55293	0.00440359	TAOK3	TAO kinase 3
7967002	7.06564	6.36766	-1.6007	0.00440428	PXN	paxillin
7995206	7.2173	6.60498	-1.56771	0.00441489	TGFB1I1	transforming growth factor beta 1 induced transcript 1
8178399	5.46447	6.26567	1.84696	0.00448862	NRM	nurim (nuclear envelope membrane protein)
8179683	5.46447	6.26567	1.84696	0.00448862	NRM	nurim (nuclear envelope membrane protein)
7952484	6.66295	7.31448	1.53318	0.004512	TMEM218	transmembrane protein 218
7998820	7.08295	6.39399	-1.59857	0.00454944	PDPK1	3-phosphoinositide dependent protein kinase-1
8167887	6.74747	7.35739	1.52398	0.00459499	MAGEH1	melanoma antigen family H, 1
8035449	7.73871	8.18376	1.42704	0.00470049	LSM4	LSM4 homolog, U6 small nuclear RNA associated (S. cerevisiae)
8114320	5.97863	6.63297	1.64886	0.00473883	HNRNPA0	heterogeneous nuclear ribonucleoprotein A0
8049512	6.85511	6.15088	-1.65842	0.00475894	LRRFIP1	leucine rich repeat (in FLII) interacting protein 1
8110022	10.5706	10.2483	-1.2719	0.00481654	ATP6V0E1	ATPase, H+ transporting, lysosomal 9kDa, V0 subunit e1
8157947	5.21437	6.09685	1.89951	0.00482601	ZBTB34	zinc finger and BTB domain containing 34
8158930	6.02817	6.79168	1.63414	0.00487267	C9orf9	chromosome 9 open reading frame 9
7991640	5.36348	6.23324	1.85828	0.00490946	TARSL2	threonyl-tRNA synthetase-like 2
8142468	10.3599	9.97375	-1.2838	0.00493787	TPM3	tropomyosin 3
7946807	10.3217	10.6386	1.26538	0.00503365	RPL36A	ribosomal protein L36a
8136401	5.76976	6.44076	1.72005	0.00504508	NUP205	nucleoporin 205kDa
8052680	10.3844	9.99686	-1.28273	0.00505688	RAB1A	RAB1A, member RAS oncogene family
8014037	6.15229	5.32628	-1.9319	0.00513271	CRLF3	cytokine receptor-like factor 3
8032290	5.94206	6.64506	1.64189	0.00522606	TCF3	transcription factor 3 (E2A immunoglobulin enhancer binding factors E12/E47)
7932964	7.74409	8.26903	1.42227	0.00523194	C1D	C1D nuclear receptor co-repressor
8021716	6.17614	6.78052	1.60612	0.00527654	C18orf55	chromosome 18 open reading frame 55
8139859	5.71594	6.54579	1.72833	0.00530725	GUSB	glucuronidase, beta
7970810	7.57407	7.08092	-1.50162	0.00536164	SLC7A1	solute carrier family 7 (cationic amino acid transporter, y+ system), member 1
8072931	6.46009	5.72592	-1.81108	0.00539506	GCAT	glycine C-acetyltransferase
8030881	9.44602	8.97201	-1.39655	0.00567554	PPP2R1A	protein phosphatase 2, regulatory subunit A, alpha
8061211	8.49024	7.90995	-1.42525	0.00581157	DTD1	D-tyrosyl-tRNA deacylase 1 homolog (S. cerevisiae)
7920317	9.56123	9.97195	1.34228	0.00581467	ILF2	interleukin enhancer binding factor 2, 45kDa
8122807	5.37227	6.24916	1.82072	0.00589622	AKAP12	A kinase (PRKA) anchor protein 12
8132843	4.82816	6.05595	2.28163	0.00589656	HAUS6	HAUS augmin-like complex, subunit 6
8065517	5.34455	6.25689	1.84972	0.00602287	ZNF337	zinc finger protein 337
8128894	6.1585	6.82396	1.60577	0.00610266	REV3L	REV3-like, catalytic subunit of DNA polymerase zeta (yeast)
8089759	7.06826	7.60701	1.47635	0.00621561	TMEM39A	transmembrane protein 39A
7922414	5.67523	6.23203	1.73245	0.0062222	SNORD76	small nucleolar RNA, C/D box 76
8117922	5.56444	6.28823	1.79282	0.00632544	PRR3	proline rich 3
7979437	6.62717	5.79021	-1.74066	0.0063368	C14orf149	chromosome 14 open reading frame 149
8095009	7.45444	6.78344	-1.5217	0.0064562	DCUN1D4	DCN1, defective in cullin neddylation 1, domain containing 4 (S. cerevisiae)
8030831	5.17364	5.97794	1.93129	0.00650864	ZNF175	zinc finger protein 175
8092073	7.30657	6.67174	-1.5518	0.00659555	EIF5A2	eukaryotic translation initiation factor 5A2
7976810	6.43438	7.17204	1.54071	0.00670085	SNORD113-3	small nucleolar RNA, C/D box 113-3
8121161	7.20843	7.76528	1.4615	0.00671244	KIAA0776	KIAA0776
8072610	8.51745	7.97272	-1.42194	0.00680333	FBXO7	F-box protein 7
8014702	5.45772	6.33675	1.78502	0.00689665	MLLT6	myeloid/lymphoid or mixed-lineage leukemia (trithorax homolog, Drosophila); translocated to, 6
7910427	7.76388	8.23051	1.41665	0.00696989	GALNT2	UDP-N-acetyl-alpha-D-galactosamine:polypeptide N-acetylgalactosaminyltransferase 2 (GalNAc-T2)
7903294	6.45253	7.03979	1.54735	0.00704659	HIAT1	hippocampus abundant transcript 1
8064245	6.1431	6.78156	1.60539	0.0070964	TCEA2	transcription elongation factor A (SII), 2
7957298	7.82936	7.31238	-1.46483	0.00721419	NAV3	neuron navigator 3
8073345	7.39933	7.97656	1.43729	0.00731738	EP300	E1A binding protein p300
7933252	5.1489	6.09514	1.97535	0.00735531	AGAP4	ArfGAP with GTPase domain, ankyrin repeat and PH domain 4
7967420	7.19646	7.75939	1.4605	0.00736372	SBNO1	strawberry notch homolog 1 (Drosophila)
8009075	7.01456	6.39746	-1.58837	0.00743314	TANC2	tetratricopeptide repeat, ankyrin repeat and coiled-coil containing 2
7948679	10.8224	11.1826	1.23639	0.0074848	EEF1G	eukaryotic translation elongation factor 1 gamma
8100347	6.93381	6.25661	-1.61027	0.0075632	SCFD2	sec1 family domain containing 2
8109333	6.36006	6.93713	1.56807	0.00770852	GPX3	glutathione peroxidase 3 (plasma)
8108927	7.62002	7.07849	-1.4873	0.00771972	RBM27	RNA binding motif protein 27
8140971	6.14108	5.16572	-1.96439	0.00783321	SAMD9L	sterile alpha motif domain containing 9-like
8052269	7.39798	6.8565	-1.52102	0.00789078	CCDC88A	coiled-coil domain containing 88A
8071541	6.88899	6.27285	-1.64184	0.00798609	TMEM191A	transmembrane protein 191A
8106962	7.02278	6.02673	-1.61267	0.0080891	ARSK	arylsulfatase family, member K
8003298	7.94392	7.39291	-1.45792	0.00815291	SLC7A5	solute carrier family 7 (cationic amino acid transporter, y+ system), member 5
8131414	6.57437	7.14564	1.52988	0.00821384	ZDHHC4	zinc finger, DHHC-type containing 4
8087210	6.64097	5.92847	-1.69876	0.00825615	PRKAR2A	protein kinase, cAMP-dependent, regulatory, type II, alpha
8105647	4.94466	5.91838	2.04417	0.00829873	C5orf44	chromosome 5 open reading frame 44
8051413	8.78763	8.25953	-1.42351	0.00833333	FAM98A	family with sequence similarity 98, member A
8008074	6.47291	7.04554	1.5492	0.0084528	CDK5RAP3	CDK5 regulatory subunit associated protein 3
8113220	9.78478	9.34533	-1.33658	0.00866665	ELL2	elongation factor, RNA polymerase II, 2
8147766	7.55814	8.0602	1.42694	0.00867307	FZD6	frizzled homolog 6 (Drosophila)
8016390	8.9935	8.48029	-1.42613	0.00879609	COPZ2	coatomer protein complex, subunit zeta 2
8056734	7.83481	7.36246	-1.45614	0.00881302	TLK1	tousled-like kinase 1
8121794	6.8386	7.41597	1.48954	0.00883592	SMPDL3A	sphingomyelin phosphodiesterase, acid-like 3A
7896746	7.46085	8.12155	1.42976	0.00884144	---	---
8052845	6.78268	7.23575	1.50536	0.00886626	TIA1	TIA1 cytotoxic granule-associated RNA binding protein
8170921	6.86439	6.18643	-1.61584	0.00897558	PLXNA3	plexin A3
7986517	6.53543	7.39356	1.51584	0.00913084	C15orf51	dynamin 1 pseudogene
7986522	6.53543	7.39356	1.51584	0.00913084	C15orf51	dynamin 1 pseudogene
8113305	5.63612	6.32594	1.71982	0.00915984	CHD1	chromodomain helicase DNA binding protein 1
8128133	7.45743	6.88705	-1.50755	0.00924511	LYRM2	LYR motif containing 2
7982531	8.0511	8.61223	1.39206	0.00936369	ANP32A // ANP32A	acidic (leucine-rich) nuclear phosphoprotein 32 family, member A // acidic (leucine-rich) nuclear phosphoprotein 32 family, member A
8043197	6.7607	6.14506	-1.65238	0.00959325	VAMP8	vesicle-associated membrane protein 8 (endobrevin)
8022814	9.7181	10.0829	1.31314	0.00961701	HNRNPA1	heterogeneous nuclear ribonucleoprotein A1
8013341	8.42592	8.95425	1.38335	0.00963646	MFAP4	microfibrillar-associated protein 4
8135277	7.94015	8.4056	1.39866	0.00971708	MLL5	myeloid/lymphoid or mixed-lineage leukemia 5 (trithorax homolog, Drosophila)
8152255	7.92946	7.34691	-1.447	0.00979482	SLC25A32	solute carrier family 25, member 32
8129804	6.10235	5.19464	-1.94521	0.00983153	MAP3K5	mitogen-activated protein kinase kinase kinase 5
8124144	8.02076	8.42862	1.39492	0.00983916	DEK	DEK oncogene
7916562	9.37597	9.74268	1.3617	0.00988056	HNRNPA1	heterogeneous nuclear ribonucleoprotein A1
8089082	10.4858	10.2181	-1.26714	0.00990227	DCBLD2	discoidin, CUB and LCCL domain containing 2
7957549	6.60776	7.18679	1.52014	0.00991013	---	---
7966183	4.88795	5.86266	2.02025	0.00991497	ALKBH2	alkB, alkylation repair homolog 2 (E. coli)
7972737	6.36218	7.10651	1.55347	0.0100178	LIG4	ligase IV, DNA, ATP-dependent
8033780	5.17215	6.05619	1.98811	0.0100686	ZNF426	zinc finger protein 426
8040211	5.37326	6.18379	1.84313	0.0101445	KLF11	Kruppel-like factor 11
8148325	6.68127	6.11626	-1.66866	0.0103134	---	---
8038261	7.08495	6.45456	-1.57026	0.0103599	GYS1	glycogen synthase 1 (muscle)
7946635	6.40442	6.99879	1.54448	0.0104194	ZBED5	zinc finger, BED-type containing 5
8044333	7.44639	6.83204	-1.50892	0.0104785	LIMS3	LIM and senescent cell antigen-like domains 3
8054519	7.44639	6.83204	-1.50892	0.0104785	LIMS3	LIM and senescent cell antigen-like domains 3
8039695	4.97471	5.77682	2.11942	0.0105651	ZNF417	zinc finger protein 417
7915787	6.72248	5.93775	-1.70015	0.0107049	PIK3R3	phosphoinositide-3-kinase, regulatory subunit 3 (gamma)
8044649	5.98088	6.68188	1.62539	0.0107097	WASH2P	WAS protein family homolog 2 pseudogene
8160308	11.4634	11.7426	1.20849	0.0110475	RPS6	ribosomal protein S6
8047339	8.62535	8.12793	-1.4125	0.0112169	BZW1L1	basic leucine zipper and W2 domains 1 like 1
8031714	6.80539	7.40771	1.49169	0.0112906	ZNF460	zinc finger protein 460
7959927	6.63325	7.20135	1.52181	0.0114136	SFRS8	splicing factor, arginine/serine-rich 8 (suppressor-of-white-apricot homolog, Drosophila)
8055038	6.17507	5.33465	-1.88882	0.0115215	LIMS2	LIM and senescent cell antigen-like domains 2
8048835	9.48749	9.06777	-1.38154	0.0116595	MFF	mitochondrial fission factor
8144528	6.02331	6.72618	1.60374	0.0119044	TNKS	tankyrase, TRF1-interacting ankyrin-related ADP-ribose polymerase
8080645	6.24474	6.94722	1.55831	0.0119129	APPL1	adaptor protein, phosphotyrosine interaction, PH domain and leucine zipper containing 1
8088092	6.79568	7.30049	1.50104	0.0119339	RFT1	RFT1 homolog (S. cerevisiae)
8131101	6.61326	7.10049	1.52502	0.0122399	NUDT1	nudix (nucleoside diphosphate linked moiety X)-type motif 1
7914153	6.16783	5.28635	-1.91429	0.0124514	EYA3	eyes absent homolog 3 (Drosophila)
7899023	6.36182	5.60791	-1.80644	0.0125776	LDLRAP1	low density lipoprotein receptor adaptor protein 1
8044804	9.74753	9.34197	-1.33404	0.0126111	DBI	diazepam binding inhibitor (GABA receptor modulator, acyl-CoA binding protein)
7950248	6.64349	5.89693	-1.68633	0.0126275	FCHSD2	FCH and double SH3 domains 2
7997852	8.04365	8.56329	1.38724	0.012643	TRAPPC2L	trafficking protein particle complex 2-like
7954503	7.99526	7.46764	-1.43375	0.0126879	MED21	mediator complex subunit 21
8176093	5.9119	6.66026	1.62664	0.0127184	LAGE3	L antigen family, member 3
7945436	7.69165	8.14682	1.40729	0.0127247	HRAS	v-Ha-ras Harvey rat sarcoma viral oncogene homolog
7966668	6.27929	6.93938	1.55935	0.0128658	TBX5	T-box 5
8088718	7.68214	7.03415	-1.46812	0.0129349	UBA3	ubiquitin-like modifier activating enzyme 3
8143684	8.12261	8.53536	1.38685	0.0129821	PDIA4	protein disulfide isomerase family A, member 4
8120411	5.74955	6.48887	1.68183	0.0130185	PRIM2	primase, DNA, polypeptide 2 (58kDa)
8111629	5.60985	6.37876	1.70609	0.0130706	NUP155	nucleoporin 155kDa
7955637	7.4395	6.81371	-1.5071	0.0131449	KRT18	keratin 18
7921344	9.86243	9.32919	-1.32924	0.0134951	ELL2	elongation factor, RNA polymerase II, 2
7966738	7.22534	6.69589	-1.52092	0.0136794	C12orf49	chromosome 12 open reading frame 49
7998577	6.0228	6.62073	1.62591	0.0136876	NME3	non-metastatic cells 3, protein expressed in
8106776	10.5465	10.8553	1.24145	0.0140434	COX7C	cytochrome c oxidase subunit VIIc
8158269	6.46457	7.05257	1.53129	0.0141386	ODF2	outer dense fiber of sperm tails 2
8040340	6.07597	5.24029	-1.90149	0.0141497	LPIN1	lipin 1
7956658	6.64538	5.81988	-1.70027	0.0142464	SLC16A7	solute carrier family 16, member 7 (monocarboxylic acid transporter 2)
8162490	8.63872	9.07901	1.37663	0.0142516	HIATL1	hippocampus abundant transcript-like 1
7914296	7.92561	7.45157	-1.43704	0.0142852	PUM1	pumilio homolog 1 (Drosophila)
7943853	6.79893	6.12518	-1.63436	0.0147744	SDHD	succinate dehydrogenase complex, subunit D, integral membrane protein
8016468	5.89296	6.57789	1.6329	0.0148576	HOXB7	homeobox B7
8062326	8.05717	7.50319	-1.42541	0.0149046	C20orf24	chromosome 20 open reading frame 24
7969693	6.29664	5.45613	-1.82636	0.0150492	RAP2A	RAP2A, member of RAS oncogene family
7906564	10.0974	9.78424	-1.28722	0.0151387	PEA15	phosphoprotein enriched in astrocytes 15
8030931	5.65653	6.52844	1.67595	0.0152458	ZNF528	zinc finger protein 528
8032974	6.39183	7.02355	1.54127	0.0152951	SAFB2	scaffold attachment factor B2
7965627	7.43617	7.81933	1.42689	0.015416	LTA4H	leukotriene A4 hydrolase
8165438	7.14835	7.70399	1.45373	0.0155564	DPP7	dipeptidyl-peptidase 7
8178884	6.07191	5.11145	-1.96226	0.0155751	HLA-DMA	major histocompatibility complex, class II, DM alpha
8180086	6.07191	5.11145	-1.96226	0.0155751	HLA-DMA	major histocompatibility complex, class II, DM alpha
7910111	7.13799	6.57761	-1.53566	0.0159952	EPHX1	epoxide hydrolase 1, microsomal (xenobiotic)
7933405	5.0237	5.98688	2.00957	0.0162292	AGAP4	ArfGAP with GTPase domain, ankyrin repeat and PH domain 4
8061075	7.82294	8.21901	1.3957	0.0163967	SNRPB2	small nuclear ribonucleoprotein polypeptide B''
7980463	7.70859	8.18465	1.40326	0.0165261	SNW1	SNW domain containing 1
8036252	8.36987	7.88681	-1.40418	0.0167007	CLIP3	CAP-GLY domain containing linker protein 3
8155148	5.52124	6.4151	1.72694	0.0169888	TMEM8B	transmembrane protein 8B
8102050	6.22512	5.41899	-1.87732	0.0175228	NHEDC2	Na+/H+ exchanger domain containing 2
7896752	8.74527	9.05269	1.37467	0.0176604	---	---
8165667	8.74527	9.05269	1.37467	0.0176604	---	---
8016077	7.0172	7.60194	1.461	0.0179594	GPATCH8	G patch domain containing 8
7943176	5.57214	6.25581	1.76853	0.0181446	MED17	mediator complex subunit 17
7919606	5.83691	6.5301	1.6558	0.018195	HIST2H2BF	histone cluster 2, H2bf
8075430	5.80355	6.4694	1.66778	0.0183434	MORC2	MORC family CW-type zinc finger 2
8025998	5.22151	6.24563	1.86368	0.0185105	ZNF136	zinc finger protein 136
7986569	6.48966	7.11825	1.51511	0.0189963	HERC2P2	hect domain and RLD 2 pseudogene 2
8127094	7.20921	6.62298	-1.51885	0.0190613	GSTA4	glutathione S-transferase alpha 4
8148304	6.0721	6.77609	1.57703	0.0195174	TRIB1	tribbles homolog 1 (Drosophila)
8143850	6.92689	7.45763	1.47448	0.0196165	CDK5	cyclin-dependent kinase 5
8138613	5.87824	6.57549	1.63646	0.0198387	OSBPL3	oxysterol binding protein-like 3
8120382	5.66407	6.31094	1.68099	0.019928	ZNF451	zinc finger protein 451
8116571	4.1182	5.73649	2.7609	0.0199666	---	---
8021275	6.09504	6.71729	1.56846	0.0204281	POLI	polymerase (DNA directed) iota
8145669	8.416	7.90502	-1.39936	0.020443	RBPMS	RNA binding protein with multiple splicing
8032926	6.15557	6.88341	1.56062	0.020472	PTPRS	protein tyrosine phosphatase, receptor type, S
8034806	5.96733	6.68048	1.61409	0.0206118	DDX39	DEAD (Asp-Glu-Ala-Asp) box polypeptide 39
8041031	6.98874	7.64498	1.45882	0.0206418	BRE	brain and reproductive organ-expressed (TNFRSF1A modulator)
8054614	6.43227	6.93926	1.52982	0.0207658	ANAPC1	anaphase promoting complex subunit 1
8094301	6.98754	7.50106	1.46289	0.0208184	SLIT2	slit homolog 2 (Drosophila)
7977344	5.68769	6.49001	1.66793	0.0208356	PACS2	phosphofurin acidic cluster sorting protein 2
8055445	7.0007	7.61805	1.45647	0.0208431	DARS	aspartyl-tRNA synthetase
7918900	4.65655	5.79623	2.22442	0.0209288	---	---
7965048	8.98902	9.42171	1.37198	0.0211962	NAP1L1	nucleosome assembly protein 1-like 1
8130129	5.84959	6.53015	1.62166	0.0214188	NUP43	nucleoporin 43kDa
8043909	6.22679	5.20604	-1.88711	0.0216575	NPAS2	neuronal PAS domain protein 2
8132557	6.13218	6.78209	1.571	0.0216851	AEBP1	AE binding protein 1
8101376	10.2771	9.89643	-1.26944	0.021874	SEC31A	SEC31 homolog A (S. cerevisiae)
7943620	6.59068	7.17137	1.50518	0.0222381	ATM	ataxia telangiectasia mutated
7983744	7.99822	7.51856	-1.41948	0.0222578	TMOD3	tropomodulin 3 (ubiquitous)
8070557	5.34988	6.08595	1.86261	0.0224793	ZNF295	zinc finger protein 295
7989037	7.48758	7.87593	1.4158	0.0226108	CCPG1	cell cycle progression 1
8027292	5.00091	6.03328	1.95567	0.0226529	ZNF431	zinc finger protein 431
8121429	5.97424	4.99173	-1.97559	0.0229529	FIG4	FIG4 homolog, SAC1 lipid phosphatase domain containing (S. cerevisiae)
8057744	8.90645	8.42952	-1.40504	0.0231495	STAT1	signal transducer and activator of transcription 1, 91kDa
7972723	6.53427	7.10045	1.52111	0.0236706	ARGLU1	arginine and glutamate rich 1
7975390	5.04247	5.95601	1.94782	0.0242369	SMOC1	SPARC related modular calcium binding 1
8088090	4.46018	5.71416	2.38594	0.0248577	RFT1	RFT1 homolog (S. cerevisiae)
8167749	5.25375	6.116	1.81647	0.0250458	FAM156A	family with sequence similarity 156, member A
8165656	7.66401	8.35681	1.39135	0.025196	---	---
8109821	11.1539	11.4091	1.21225	0.0253351	RPL10	ribosomal protein L10
8058927	9.23765	8.75532	-1.39098	0.0253407	TMBIM1	transmembrane BAX inhibitor motif containing 1
8134470	5.8193	6.47877	1.64545	0.0254348	TRRAP	transformation/transcription domain-associated protein
8089652	9.43206	8.99886	-1.36934	0.0255797	NAA50	N(alpha)-acetyltransferase 50, NatE catalytic subunit
8146756	5.90852	6.5002	1.59059	0.0255949	CSPP1	centrosome and spindle pole associated protein 1
8007302	8.11718	7.58002	-1.40824	0.0259721	TUBG1	tubulin, gamma 1
8024936	6.85777	7.32185	1.4773	0.0261893	SAFB	scaffold attachment factor B
8168557	8.83996	8.41229	-1.40166	0.0262455	SH3BGRL	SH3 domain binding glutamic acid-rich protein like
8023575	6.73509	6.07808	-1.63535	0.0263078	CCBE1	collagen and calcium binding EGF domains 1
7943297	6.16854	6.65463	1.56794	0.0268374	CEP57	centrosomal protein 57kDa
8112182	5.53561	6.30353	1.70988	0.0275451	MIER3	mesoderm induction early response 1, family member 3
8121704	8.29035	7.75047	-1.39723	0.0275873	NUS1	nuclear undecaprenyl pyrophosphate synthase 1 homolog (S. cerevisiae)
8016562	7.39175	7.84842	1.42014	0.0276494	SPOP	speckle-type POZ protein
7982957	4.98522	5.86478	2.00135	0.0277571	MGA	MAX gene associated
8054131	6.41178	6.99683	1.52284	0.0282101	C2orf64	chromosome 2 open reading frame 64
8017810	8.26897	7.87275	-1.39477	0.0282339	PSMD12	proteasome (prosome, macropain) 26S subunit, non-ATPase, 12
8091306	6.22146	5.37499	-1.84717	0.0286835	PLSCR4	phospholipid scramblase 4
8001197	4.88036	5.93723	2.01115	0.0287336	NETO2	neuropilin (NRP) and tolloid (TLL)-like 2
8176091	6.16959	6.75067	1.57539	0.0289014	LOC158960	hypothetical protein BC009467
8048847	9.01746	8.5794	-1.39987	0.0294548	AGFG1	ArfGAP with FG repeats 1
8135250	9.17216	8.68952	-1.39482	0.0296853	PSMC2	proteasome (prosome, macropain) 26S subunit, ATPase, 2
8178435	8.59522	8.91996	1.36303	0.0299918	IER3	immediate early response 3
8113073	7.13696	7.67298	1.43172	0.0302169	ARRDC3	arrestin domain containing 3
8042468	7.91211	7.43586	-1.42104	0.0302583	ANXA4	annexin A4
8066195	8.77914	8.24859	-1.39627	0.0303403	BLCAP	bladder cancer associated protein
7929282	6.48794	7.03692	1.50835	0.0308215	HHEX	hematopoietically expressed homeobox
7932243	6.43662	7.10352	1.50648	0.0310885	FAM171A1	family with sequence similarity 171, member A1
7979085	7.25983	6.69308	-1.49811	0.0312518	PYGL	phosphorylase, glycogen, liver
8008139	9.28486	8.82157	-1.38158	0.0313663	UBE2Z	ubiquitin-conjugating enzyme E2Z
8026339	9.15142	9.59487	1.35793	0.0318935	SNRPG	small nuclear ribonucleoprotein polypeptide G
8143988	6.83871	7.4287	1.46576	0.0319184	MLL3	myeloid/lymphoid or mixed-lineage leukemia 3
7928907	6.91946	6.23314	-1.56661	0.0319263	GLUD1	glutamate dehydrogenase 1
8008493	7.39453	7.8276	1.41172	0.0320152	LUC7L3	LUC7-like 3 (S. cerevisiae)
7902227	8.66002	8.18155	-1.39198	0.0322555	GADD45A	growth arrest and DNA-damage-inducible, alpha
8106923	6.81507	6.17421	-1.6154	0.0325985	NR2F1	nuclear receptor subfamily 2, group F, member 1
7950544	6.26452	6.88026	1.5201	0.0326379	PRKRIR	protein-kinase, interferon-inducible double stranded RNA dependent inhibitor, repressor of (P58 repressor)
8109326	6.0481	5.10908	-1.90275	0.0328445	C5orf62	chromosome 5 open reading frame 62
8079079	5.94861	6.66336	1.59491	0.0331843	NKTR	natural killer-tumor recognition sequence
8106702	6.70524	5.97913	-1.64001	0.0332174	ZCCHC9	zinc finger, CCHC domain containing 9
7954279	6.82278	7.38989	1.46793	0.0332654	AEBP2	AE binding protein 2
7967412	8.99	8.56118	-1.39733	0.0335811	CDK2AP1	cyclin-dependent kinase 2 associated protein 1
8085628	6.91975	6.31594	-1.56172	0.0336008	ANKRD28	ankyrin repeat domain 28
7931226	7.82089	7.33116	-1.42862	0.0336502	ZRANB1	zinc finger, RAN-binding domain containing 1
8150870	8.19846	7.82633	-1.39557	0.0338146	PSMC6	proteasome (prosome, macropain) 26S subunit, ATPase, 6
8064432	6.58901	5.83769	-1.66654	0.0340444	FKBP1A	FK506 binding protein 1A, 12kDa
8013515	5.21038	6.05915	1.93513	0.0342499	C17orf51	chromosome 17 open reading frame 51
8077970	4.69888	5.87414	2.12636	0.0343908	FBLN2	fibulin 2
7906995	8.11607	7.52571	-1.40588	0.0347896	UCK2	uridine-cytidine kinase 2
8171066	6.19633	6.87506	1.54489	0.0347982	LOC100288778	similar to WAS protein family homolog 1
8093256	9.77674	10.0693	1.28711	0.0349905	---	---
8175169	7.24106	6.72487	-1.49789	0.0353217	RAP2C	RAP2C, member of RAS oncogene family
8027996	6.87867	7.33107	1.4702	0.035344	PSENEN	presenilin enhancer 2 homolog (C. elegans)
8139165	7.2221	7.71803	1.42495	0.03558	VPS41	vacuolar protein sorting 41 homolog (S. cerevisiae)
8165644	10.9386	11.1586	1.21911	0.0357297	---	---
7942503	7.74165	7.23643	-1.43533	0.0362118	PPME1	protein phosphatase methylesterase 1
8054532	7.08643	7.52989	1.44202	0.0365631	RGPD5	RANBP2-like and GRIP domain containing 5
8020323	5.93491	6.56042	1.60044	0.0370549	RNMT	RNA (guanine-7-) methyltransferase
8122327	5.91926	5.07878	-1.89487	0.0375952	CCDC28A	coiled-coil domain containing 28A
8176174	6.93412	6.2604	-1.55755	0.0376519	MPP1	membrane protein, palmitoylated 1, 55kDa
7925229	6.09407	6.6445	1.56479	0.0378166	B3GALNT2	beta-1,3-N-acetylgalactosaminyltransferase 2
8001658	8.10485	8.54627	1.36541	0.0378388	C16orf80	chromosome 16 open reading frame 80
8083429	8.78618	8.28175	-1.39121	0.0378903	MBNL1	muscleblind-like (Drosophila)
8072242	7.56033	7.052	-1.4569	0.0381262	NF2	neurofibromin 2 (merlin)
7929116	6.73769	7.25871	1.47781	0.0381762	RPP30	ribonuclease P/MRP 30kDa subunit
8041048	7.11777	6.60447	-1.51772	0.0383003	FOSL2	FOS-like antigen 2
8136448	8.08418	8.53277	1.36576	0.0384485	CHRM2	cholinergic receptor, muscarinic 2
8015445	7.22538	6.67455	-1.49637	0.0384868	NT5C3L	5'-nucleotidase, cytosolic III-like
7992682	7.01164	6.38717	-1.53931	0.038913	PDPK1	3-phosphoinositide dependent protein kinase-1
8119858	7.44239	6.8799	-1.47603	0.0390738	POLH	polymerase (DNA directed), eta
8063835	5.83248	6.48724	1.63415	0.0394706	LSM14B	LSM14B, SCD6 homolog B (S. cerevisiae)
8053648	6.16144	5.51075	-1.79112	0.0394924	KRCC1	lysine-rich coiled-coil 1
7973727	6.35939	5.61681	-1.75188	0.040267	NYNRIN	NYN domain and retroviral integrase containing
8158372	8.76315	9.18959	1.35952	0.0406793	SET	SET nuclear oncogene
7965403	9.24782	9.71919	1.34624	0.0408499	LUM	lumican
7912292	7.02851	7.56215	1.43316	0.0413009	LZIC	leucine zipper and CTNNBIP1 domain containing
8026982	8.02046	8.50338	1.36587	0.0415186	MPV17L2	MPV17 mitochondrial membrane protein-like 2
7931379	6.19872	6.86413	1.54554	0.0416008	MGMT	O-6-methylguanine-DNA methyltransferase
8044919	7.14052	6.62007	-1.50388	0.0420011	RALB	v-ral simian leukemia viral oncogene homolog B (ras related; GTP binding protein)
7903703	8.50573	8.0894	-1.38362	0.0422405	GNAI3	guanine nucleotide binding protein (G protein), alpha inhibiting activity polypeptide 3
8093462	7.11197	7.65532	1.4323	0.0425311	MAEA	macrophage erythroblast attacher
7956046	6.62662	5.81529	-1.64947	0.0426566	DGKA	diacylglycerol kinase, alpha 80kDa
8158298	5.46147	6.20828	1.74577	0.0431576	GLE1	GLE1 RNA export mediator homolog (yeast)
8052956	6.5673	7.06754	1.49334	0.0437615	EXOC6B	exocyst complex component 6B
8112596	5.75679	6.42973	1.63539	0.0443861	ANKRA2	ankyrin repeat, family A (RFXANK-like), 2
7933427	5.03011	5.96212	1.95624	0.0444397	AGAP5	ArfGAP with GTPase domain, ankyrin repeat and PH domain 5
7948782	7.61832	8.08541	1.38777	0.0448787	UBXN1	UBX domain protein 1
8097449	4.90563	5.97828	1.97009	0.0451769	PCDH10	protocadherin 10
8038202	6.73565	6.04574	-1.62553	0.0456256	BCAT2	branched chain amino-acid transaminase 2, mitochondrial
7985119	5.76513	6.38236	1.64309	0.0459457	HMG20A	high-mobility group 20A
8017162	5.76318	6.52325	1.64383	0.0459665	RNFT1	ring finger protein, transmembrane 1
8008237	8.70241	8.27765	-1.38581	0.0462388	ITGA3	integrin, alpha 3 (antigen CD49C, alpha 3 subunit of VLA-3 receptor)
8046975	6.64458	7.11586	1.48184	0.0467643	WDR75	WD repeat domain 75
8026250	5.35374	6.14073	1.75934	0.0468401	DCAF15	DDB1 and CUL4 associated factor 15
8085374	7.56502	7.0714	-1.44882	0.0470481	RAF1	v-raf-1 murine leukemia viral oncogene homolog 1
8030838	4.61404	5.6898	2.308	0.0471444	FLJ30403	hypothetical protein LOC729975
8133155	8.02146	7.55361	-1.40131	0.0472661	TPST1	tyrosylprotein sulfotransferase 1
8124134	6.15978	5.44015	-1.77112	0.0477606	TPMT	thiopurine S-methyltransferase
7904469	6.72957	7.29984	1.47072	0.0483576	SRGAP2	SLIT-ROBO Rho GTPase activating protein 2
8001099	6.58097	7.27274	1.47237	0.0485387	HERC2P4	hect domain and RLD 2 pseudogene 4
8079274	6.64467	7.21929	1.47208	0.0485979	TMEM42	transmembrane protein 42
8101340	7.62234	8.07947	1.3864	0.0487339	HNRPDL	heterogeneous nuclear ribonucleoprotein D-like
