# Supplementary material for: Sumoylation at chromatin governs coordinated repression of a transcriptional program essential for cell growth and proliferation
Source: HighWire-hosted journal article supplement (doi:10.1101/gr.154872.113), 2013-07-26
Supplement: Supplemental_Table7.xlsx [file Supplemental_Table7.xlsx]

## Sheet: Feuil1
Ensembl gene id	Senescent Average RPKM	Proliferative moyenne RPKM	log2(S/P)	Adjusted p-value	Gene name	Description
ENSG00000205021	8.04808	0	Inf	1.27652e-12	CCL3L1	chemokine (C-C motif) ligand 3-like 1
ENSG00000256515	10.2503	0	Inf	7.52771e-14	CCL3L3	chemokine (C-C motif) ligand 3-like 3
ENSG00000169509	4.57931	0	Inf	1.20972e-13	CRCT1	cysteine-rich C-terminal 1
ENSG00000121966	5.24649	0	Inf	3.54905e-30	CXCR4	chemokine (C-X-C motif) receptor 4
ENSG00000136695	3.35148	0	Inf	4.0651e-17	IL1F5	interleukin 1 family, member 5 (delta)
ENSG00000186226	9.11256	0	Inf	3.60454e-20	LCE1E	late cornified envelope 1E
ENSG00000240386	668.349	0	Inf	0	LCE1F	late cornified envelope 1F
ENSG00000187180	18.8458	0.00918049	Inf	3.4987e-41	LCE2C	late cornified envelope 2C
ENSG00000163202	7.39361	0	Inf	4.06124e-17	LCE3D	late cornified envelope 3D
ENSG00000124102	52.1239	0	Inf	1.82617e-99	PI3	peptidase inhibitor 3, skin-derived
ENSG00000203783	3.11336	0	Inf	3.03592e-15	PRR9	proline rich 9
ENSG00000250038	9.60695	0	Inf	4.17221e-25	RP11-180C1.1	Uncharacterized protein
ENSG00000204982	23.1347	0	Inf	2.89928e-15	RP11-255A11.7
ENSG00000206073	3.21562	0	Inf	1.03114e-15	SERPINB4	serpin peptidase inhibitor, clade B (ovalbumin), member 4
ENSG00000201403	74.068	0	Inf	2.80814e-23	SNORD14B	small nucleolar RNA, C/D box 14B
ENSG00000163216	3.63975	0	Inf	2.86332e-12	SPRR2D	small proline-rich protein 2D
ENSG00000073861	3.29242	0	Inf	1.8226e-29	TBX21	T-box 21
ENSG00000207501	5.3562	0	Inf	4.95326e-07	U1.93	U1 spliceosomal RNA
ENSG00000200033	78.6543	0	Inf	1.53609e-29	U6.92	U6 spliceosomal RNA
ENSG00000006075	39.5795	0.0375045	9,8999589482911	4.91836e-95	CCL3	chemokine (C-C motif) ligand 3
ENSG00000106952	2.56404	0.00741537	8,49677271707318	3.72549e-16	TNFSF8	tumor necrosis factor (ligand) superfamily, member 8
ENSG00000074317	23.8057	0.107147	7,81444443198814	3.48181e-65	SNCB	synuclein, beta
ENSG00000145107	34.1656	0.250874	7,70597916802532	1.25157e-91	TM4SF19	transmembrane 4 L six family member 19
ENSG00000101188	14.1748	0.0910235	7,55424132470001	3.3237e-132	NTSR1	neurotensin receptor 1 (high affinity)
ENSG00000188064	24.7511	0.179441	7,50451454886028	1.94847e-136	WNT7B	wingless-type MMTV integration site family, member 7B
ENSG00000170054	14.04	0.095559	7,43342712110723	6.71565e-60	SERPINA9	serpin peptidase inhibitor, clade A (alpha-1 antiproteinase, antitrypsin), member 9
ENSG00000174792	4.73561	0.0110796	7,40640162175645	5.67845e-09	C4orf26	chromosome 4 open reading frame 26
ENSG00000181634	127.842	0.818098	7,34091523383101	9.07903e-268	TNFSF15	tumor necrosis factor (ligand) superfamily, member 15
ENSG00000124479	7.02143	0.0513203	7,34023749112448	1.46125e-22	NDP	Norrie disease (pseudoglioma)
ENSG00000128564	46.2546	0.336074	7,14986592943407	4.99367e-191	VGF	VGF nerve growth factor inducible
ENSG00000164935	26.1452	0.226459	7,09984229422047	1.53758e-56	TM7SF4	transmembrane 7 superfamily member 4
ENSG00000076864	16.982	0.0515378	7,00912187463253	3.02347e-42	RAP1GAP	RAP1 GTPase activating protein
ENSG00000197249	16.1757	0.106279	6,97257913049715	2.09133e-62	SERPINA1	serpin peptidase inhibitor, clade A (alpha-1 antiproteinase, antitrypsin), member 1
ENSG00000170369	13.928	0.125885	6,96591458196872	1.88078e-29	CST2	cystatin SA
ENSG00000101441	46.424	0.433145	6,78137251326844	1.72229e-82	CST4	cystatin S
ENSG00000011347	13.8086	0.178194	6,5934241857416	7.44041e-63	SYT7	synaptotagmin VII
ENSG00000243509	12.8023	0.151093	6,57672792146474	7.05379e-39	TNFRSF6B	tumor necrosis factor receptor superfamily, member 6b, decoy
ENSG00000178726	54.7811	0.58564	6,54177719527848	2.742e-221	THBD	thrombomodulin
ENSG00000149968	1884.21	21.0912	6,48262774736033	1.93691e-189	MMP3	matrix metallopeptidase 3 (stromelysin 1, progelatinase)
ENSG00000235385	13.3372	0.131558	6,42342445911413	2.12565e-34	GS1-600G8.5
ENSG00000066056	37.4417	0.640602	6,3954891869673	2.4784e-102	TIE1	tyrosine kinase with immunoglobulin-like and EGF-like domains 1
ENSG00000108342	219.631	2.96654	6,37241591959694	2.6614e-233	CSF3	colony stimulating factor 3 (granulocyte)
ENSG00000160870	4.34102	0.0504644	6,26075176700887	2.63686e-19	CYP3A7	cytochrome P450, family 3, subfamily A, polypeptide 7
ENSG00000250591	6.24135	0.0854118	6,20880979130912	1.13574e-10	U66061.38
ENSG00000010438	704.383	8.74687	6,20539002506633	4.84362e-232	PRSS3	protease, serine, 3
ENSG00000125931	6.79786	0.137361	6,18114292249242	2.04772e-17	CITED1	Cbp/p300-interacting transactivator, with Glu/Asp-rich carboxy-terminal domain, 1
ENSG00000187173	32.9367	0.483466	6,11092873539192	3.0007e-46	LCE2A	late cornified envelope 2A
ENSG00000222022	10.0696	0.149315	6,10713173786075	4.55047e-16	AC112721.1	Uncharacterized protein
ENSG00000170373	158.282	2.53575	6,07034235500257	4.55087e-165	CST1	cystatin SN
ENSG00000158050	17.4436	0.291774	6,01489022518744	2.4106e-58	DUSP2	dual specificity phosphatase 2
ENSG00000189058	3.8467	0.0647634	5,82283988809934	9.87834e-11	APOD	apolipoprotein D
ENSG00000166670	107.102	1.76191	5,81978660391593	4.56544e-138	MMP10	matrix metallopeptidase 10 (stromelysin 2)
ENSG00000164400	186.214	3.85985	5,78822652281952	1.58965e-174	CSF2	colony stimulating factor 2 (granulocyte-macrophage)
ENSG00000164690	4.70638	0.0223711	5,75886653017549	2.9617e-13	SHH	sonic hedgehog
ENSG00000163735	81.8169	1.74969	5,72991187515369	1.60845e-189	CXCL5	chemokine (C-X-C motif) ligand 5
ENSG00000125538	2531.53	55.921	5,68312672519154	1.00439e-129	IL1B	interleukin 1, beta
ENSG00000159455	7.94132	0.177005	5,63567717704046	1.16139e-12	LCE2B	late cornified envelope 2B
ENSG00000251393	8.19637	0.177625	5,62046177002397	5.1268e-49	AC005280.3
ENSG00000057704	6.41318	0.136333	5,59150600532893	1.47945e-70	TMCC3	transmembrane and coiled-coil domain family 3
ENSG00000141668	7.5763	0.163483	5,58140897467234	9.19251e-47	CBLN2	cerebellin 2 precursor
ENSG00000250697	16.4357	0.347421	5,53623449882919	9.9727e-16	CTD-2066L21.3
ENSG00000197632	2889.81	68.1045	5,51561311895769	6.10716e-94	SERPINB2	serpin peptidase inhibitor, clade B (ovalbumin), member 2
ENSG00000232679	65.6464	1.5366	5,48243979851267	2.10133e-69	RP11-400N13.3
ENSG00000108932	63.0578	1.53468	5,42803763984499	1.60692e-179	SLC16A6	solute carrier family 16, member 6 (monocarboxylic acid transporter 7)
ENSG00000165474	4.52593	0.119645	5,37269736240686	1.00929e-22	GJB2	gap junction protein, beta 2, 26kDa
ENSG00000232457	46.0637	1.17186	5,36292432102625	2.55565e-57	AC037487.1
ENSG00000186642	7.25106	0.0438664	5,35220262384543	6.46444e-12	PDE2A	phosphodiesterase 2A, cGMP-stimulated
ENSG00000140379	35.3491	0.930336	5,32570248100893	3.91297e-59	BCL2A1	BCL2-related protein A1
ENSG00000163235	3.90743	0.0972972	5,31645559757842	2.10235e-10	TGFA	transforming growth factor, alpha
ENSG00000027869	6.24694	0.131328	5,22319792976415	1.69786e-16	SH2D2A	SH2 domain containing 2A
ENSG00000240476	52.1165	1.46322	5,2215991283833	1.32357e-80	CTD-2021J15.2
ENSG00000151834	5.80945	0.216163	5,21338470513274	2.5113e-14	GABRA2	gamma-aminobutyric acid (GABA) A receptor, alpha 2
ENSG00000237596	4.32212	0.129215	5,19531618605734	9.76693e-09	RP13-143G15.4
ENSG00000124126	14.8251	0.490258	5,14860534255784	4.15539e-118	PREX1	phosphatidylinositol-3,4,5-trisphosphate-dependent Rac exchange factor 1
ENSG00000201699	36.9798	1.01106	5,11359955329054	7.97091e-14	U1.50	U1 spliceosomal RNA
ENSG00000100558	60.5515	1.89828	5,10539918849853	1.65929e-115	PLEK2	pleckstrin 2
ENSG00000101187	6.05187	0.211712	5,07719038411819	3.22106e-19	SLCO4A1	solute carrier organic anion transporter family, member 4A1
ENSG00000115009	81.2533	2.85281	5,07477317867203	1.52358e-97	CCL20	chemokine (C-C motif) ligand 20
ENSG00000137266	4.9808	0.0835098	5,05932776810122	4.65328e-20	SLC22A23	solute carrier family 22, member 23
ENSG00000115008	115.945	3.91706	5,02559644053814	2.7227e-162	IL1A	interleukin 1, alpha
ENSG00000179388	13.1293	0.549144	5,00417355337751	3.21621e-45	EGR3	early growth response 3
ENSG00000251893	136.211	4.809	4,93526306252432	3.97174e-32	SNORA70.15	Small nucleolar RNA SNORA70
ENSG00000238042	3.80693	0.128856	4,92635552359642	1.27123e-07	RP11-815M8.1
ENSG00000198848	3.29274	0.111454	4,91841023975423	3.0316e-13	CES1	carboxylesterase 1
ENSG00000014257	41.5803	1.52796	4,85790602759948	1.66648e-63	ACPP	acid phosphatase, prostate
ENSG00000125089	12.786	0.519593	4,827806642856	1.15011e-27	AC104650.1	SH3 domain and tetratricopeptide repeats-containing protein 1
ENSG00000236453	27.3751	1.03156	4,82442523635586	1.55032e-34	AC003092.1
ENSG00000133169	8.12016	0.302049	4,77885571091122	2.98661e-14	BEX1	brain expressed, X-linked 1
ENSG00000163734	190.262	7.82743	4,76145401811819	6.45064e-132	CXCL3	chemokine (C-X-C motif) ligand 3
ENSG00000124455	3.04948	0.112798	4,74068579288068	2.03884e-07	L34079.1	Uncharacterized protein ENSP00000244321
ENSG00000122877	17.3648	0.562858	4,72066733183168	1.44767e-54	EGR2	early growth response 2
ENSG00000164283	41.922	1.51431	4,70584257538119	1.00261e-85	ESM1	endothelial cell-specific molecule 1
ENSG00000250748	8.35337	0.384838	4,66438813699563	3.20412e-13	RP11-230G5.2
ENSG00000132334	4.89982	0.152861	4,61603812895375	7.83565e-10	PTPRE	protein tyrosine phosphatase, receptor type, E
ENSG00000159261	7.4843	0.347309	4,61091077235418	1.55749e-22	CLDN14	claudin 14
ENSG00000170345	17.1257	0.736972	4,60663874695166	1.79202e-44	FOS	FBJ murine osteosarcoma viral oncogene homolog
ENSG00000201129	16.7746	0.734153	4,56834358361405	1.02441e-06	SNORA58.2	Small nucleolar RNA SNORA58
ENSG00000100055	24.9047	1.02865	4,55371714259695	1.68611e-32	CYTH4	cytohesin 4
ENSG00000234188	4.95994	0.20469	4,53417757622158	1.98208e-06	AL121963.1
ENSG00000124731	13.4241	0.658952	4,52315522967639	9.69996e-22	TREM1	triggering receptor expressed on myeloid cells 1
ENSG00000175471	10.0112	1.00993	4,43635384231808	4.88025e-21	MCTP1	multiple C2 domains, transmembrane 1
ENSG00000157551	24.1541	0.940521	4,43458936495519	2.3215e-51	KCNJ15	potassium inwardly-rectifying channel, subfamily J, member 15
ENSG00000163273	9.77675	0.440781	4,41539392513202	1.96752e-11	NPPC	natriuretic peptide C
ENSG00000242147	4.40879	0.232549	4,35191049513343	3.32306e-07	RP13-463N16.6
ENSG00000110848	7.40229	0.532887	4,32782636592198	1.52921e-18	CD69	CD69 molecule
ENSG00000206199	21.0869	1.51855	4,28579274984902	1.32583e-21	C3orf16	chromosome 3 open reading frame 16
ENSG00000110203	10.9218	0.651047	4,21181938081524	1.6001e-15	FOLR3	folate receptor 3 (gamma)
ENSG00000164647	18.7857	1.22849	4,18248386026213	1.72042e-33	STEAP1	six transmembrane epithelial antigen of the prostate 1
ENSG00000222032	11.0806	0.651708	4,17819636360709	1.85735e-10	AC112721.2
ENSG00000062282	64.3883	4.83605	4,16670742699173	2.13004e-72	DGAT2	diacylglycerol O-acyltransferase 2
ENSG00000002079	5.38063	0.153422	4,15534481873569	7.41384e-07	MYH16	myosin, heavy chain 16 pseudogene
ENSG00000137473	2.90279	0.194184	4,15306176490989	5.9337e-09	TTC29	tetratricopeptide repeat domain 29
ENSG00000108551	29.4312	1.7403	4,14777914770849	5.79552e-61	RASD1	RAS, dexamethasone-induced 1
ENSG00000111863	14.8993	0.90919	4,11153046338201	1.72328e-19	C6orf105	chromosome 6 open reading frame 105
ENSG00000135114	32.3399	2.22807	4,07383675270265	4.54191e-66	OASL	2'-5'-oligoadenylate synthetase-like
ENSG00000166920	64.4901	4.4121	4,06160889531216	1.34303e-61	C15orf48	chromosome 15 open reading frame 48
ENSG00000152463	6.33408	0.320636	4,02978891183490	1.57679e-08	OLAH	oleoyl-ACP hydrolase
ENSG00000135373	30.9524	2.76106	4,01627622120192	2.04459e-38	EHF	ets homologous factor
ENSG00000113600	6.403	0.409787	4,01381836014901	4.19451e-07	C9	complement component 9
ENSG00000135549	19.1716	1.44985	4,00158241938738	1.7694e-29	PKIB	protein kinase (cAMP-dependent, catalytic) inhibitor beta
ENSG00000253675	5.04116	0.337763	3,98553108366033	8.62825e-05	CTD-3118D11.2
ENSG00000104783	6.15007	0.415738	3,98008117739279	2.97318e-19	KCNN4	potassium intermediate/small conductance calcium-activated channel, subfamily N, member 4
ENSG00000187990	50.5451	3.31272	3,96636122010628	1.03307e-29	HIST1H2BG	histone cluster 1, H2bg
ENSG00000100628	4.9314	0.333726	3,95353720634958	1.81481e-18	ASB2	ankyrin repeat and SOCS box containing 2
ENSG00000235897	8.47633	0.48742	3,93352950274671	2.22204e-06	AC069257.4
ENSG00000179111	3.46464	0.24481	3,93249064570645	2.14405e-09	HES7	hairy and enhancer of split 7 (Drosophila)
ENSG00000133135	3.79963	0.278523	3,93179727288894	3.80877e-13	RNF128	ring finger protein 128
ENSG00000081041	91.3915	6.722	3,89519759224034	1.46099e-67	CXCL2	chemokine (C-X-C motif) ligand 2
ENSG00000144136	1359.16	97.2866	3,84744333081327	1.50512e-67	SLC20A1	solute carrier family 20 (phosphate transporter), member 1
ENSG00000249751	23.1534	1.64511	3,84669621239836	6.72625e-12	ECSCR	endothelial cell-specific chemotaxis regulator
ENSG00000110944	7.49752	0.573149	3,83779565511197	6.18185e-12	IL23A	interleukin 23, alpha subunit p19
ENSG00000147614	5.96497	0.634929	3,81514789271384	9.26701e-09	ATP6V0D2	ATPase, H+ transporting, lysosomal 38kDa, V0 subunit d2
ENSG00000072041	109.094	8.24454	3,81416408777692	3.51083e-108	SLC6A15	solute carrier family 6 (neutral amino acid transporter), member 15
ENSG00000196890	5.20324	0.354574	3,79667097806667	1.95321e-05	HIST3H2BB	histone cluster 3, H2bb
ENSG00000134548	3.87723	0.464025	3,71908373432371	1.35602e-08	C12orf39	chromosome 12 open reading frame 39
ENSG00000165949	911.616	76.7616	3,68528444083781	5.33151e-101	IFI27	interferon, alpha-inducible protein 27
ENSG00000221164	27.8054	2.31981	3,67112328627536	6.2082e-06	SNORA11.3	Small nucleolar RNA SNORA11
ENSG00000174775	1387.67	80.1442	3,63532866215278	7.71545e-94	HRAS	v-Ha-ras Harvey rat sarcoma viral oncogene homolog
ENSG00000169429	1770.59	159.105	3,62923634794702	3.53744e-60	IL8	interleukin 8
ENSG00000165379	5.54555	0.474687	3,62073413754428	3.87645e-25	LRFN5	leucine rich repeat and fibronectin type III domain containing 5
ENSG00000069482	54.694	4.88395	3,58633386917753	5.75026e-43	GAL	galanin prepropeptide
ENSG00000198805	104.483	9.43558	3,56844964385473	5.48564e-84	PNP	purine nucleoside phosphorylase
ENSG00000177283	60.492	5.2497	3,55648781031204	1.20852e-87	FZD8	frizzled homolog 8 (Drosophila)
ENSG00000164683	27.3654	2.05414	3,54843168538483	8.42024e-35	HEY1	hairy/enhancer-of-split related with YRPW motif 1
ENSG00000120738	264.233	24.1819	3,5016974801507	8.26076e-92	EGR1	early growth response 1
ENSG00000181218	92.3656	8.56829	3,47938079625605	1.24748e-41	HIST3H2A	histone cluster 3, H2a
ENSG00000123500	21.9676	1.12675	3,47023298015343	4.09135e-22	COL10A1	collagen, type X, alpha 1
ENSG00000172183	17.044	1.71666	3,46970162366938	5.25547e-19	ISG20	interferon stimulated exonuclease gene 20kDa
ENSG00000118785	10.7096	0.909825	3,45614568131594	1.85525e-13	SPP1	secreted phosphoprotein 1
ENSG00000089127	55.547	5.76781	3,44754374017712	3.5069e-64	OAS1	2',5'-oligoadenylate synthetase 1, 40/46kDa
ENSG00000128567	77.4486	8.35441	3,42896720263409	2.38578e-83	PODXL	podocalyxin-like
ENSG00000211519	1793.53	196.875	3,40626375596766	9.1598e-76	MIR147B	microRNA 147b
ENSG00000058085	13.7369	2.05646	3,38420628035991	1.41039e-25	LAMC2	laminin, gamma 2
ENSG00000248323	9.12261	0.79258	3,37553921781134	2.29027e-09	RP11-213H15.3
ENSG00000134326	22.1526	3.28934	3,37538975568002	3.24703e-31	CMPK2	cytidine monophosphate (UMP-CMP) kinase 2, mitochondrial
ENSG00000168062	17.9255	1.7148	3,36833150061742	2.01667e-27	BATF2	basic leucine zipper transcription factor, ATF-like 2
ENSG00000123496	20.0122	2.44912	3,35410556084529	2.76394e-26	IL13RA2	interleukin 13 receptor, alpha 2
ENSG00000124882	68.6785	7.38065	3,33593741518225	2.21139e-82	EREG	epiregulin
ENSG00000202364	8.51789	0.921934	3,33135343290081	0.000249612	SNORD3A	small nucleolar RNA, C/D box 3A
ENSG00000236345	3.04268	0.329634	3,33063735853415	2.71839e-06	RP11-59D5__B.2
ENSG00000233532	4.5391	0.529396	3,33031775114397	6.97194e-05	RP11-165M6.1
ENSG00000112149	10.1365	1.08464	3,29387504963080	3.0304e-24	CD83	CD83 molecule
ENSG00000089723	10.1908	1.0845	3,28440656838519	4.14358e-34	OTUB2	OTU domain, ubiquitin aldehyde binding 2
ENSG00000175040	56.4466	6.17705	3,28269128131612	2.10415e-76	CHST2	carbohydrate (N-acetylglucosamine-6-O) sulfotransferase 2
ENSG00000203812	237.172	25.7771	3,27335749242833	1.18182e-67	HIST2H2AA4	histone cluster 2, H2aa4
ENSG00000221462	33.7633	3.96041	3,26744376914282	1.48973e-06	SNORA76	small nucleolar RNA, H/ACA box 76
ENSG00000184260	69.3849	7.54909	3,26605583380801	6.37367e-28	HIST2H2AC	histone cluster 2, H2ac
ENSG00000102003	5.29715	0.460689	3,26602211380779	2.12419e-05	SYP	synaptophysin
ENSG00000147883	74.7106	7.95846	3,23470946516199	1.58528e-63	CDKN2B	cyclin-dependent kinase inhibitor 2B (p15, inhibits CDK4)
ENSG00000170006	4.54807	0.593038	3,23336572132468	4.50382e-14	TMEM154	transmembrane protein 154
ENSG00000168274	12.9464	1.45681	3,21607553208151	2.94953e-08	HIST1H2AE	histone cluster 1, H2ae
ENSG00000171310	7.6992	0.862877	3,21197967463888	1.0151e-35	CHST11	carbohydrate (chondroitin 4) sulfotransferase 11
ENSG00000238271	32.8254	3.78881	3,19604203972175	1.17306e-18	IFNWP19	interferon, omega 1 pseudogene 19
ENSG00000183696	368.132	40.7651	3,18639511266523	4.73347e-78	UPP1	uridine phosphorylase 1
ENSG00000255594	195.759	23.2679	3,17918117576699	1.54652e-65	Z82188.1
ENSG00000151136	12.1	1.59669	3,17387754759463	5.66098e-40	BTBD11	BTB (POZ) domain containing 11
ENSG00000069812	4.82715	0.414126	3,16540077298284	2.8785e-05	HES2	hairy and enhancer of split 2 (Drosophila)
ENSG00000231672	4.27563	0.496533	3,15908916685976	1.33492e-13	DIRC3	disrupted in renal carcinoma 3
ENSG00000183558	111.459	13.2185	3,14724861924898	1.01431e-58	HIST2H2AA3	histone cluster 2, H2aa3
ENSG00000003137	11.9729	1.60174	3,14638673077546	1.24599e-20	CYP26B1	cytochrome P450, family 26, subfamily B, polypeptide 1
ENSG00000123610	4.8575	0.725257	3,13850298696280	3.27138e-07	TNFAIP6	tumor necrosis factor, alpha-induced protein 6
ENSG00000115602	25.0975	3.5198	3,13032411135991	5.25158e-30	IL1RL1	interleukin 1 receptor-like 1
ENSG00000171889	34.6158	4.20373	3,12724291588063	6.39598e-24	RP11-354P17.9
ENSG00000157168	111.29	15.0412	3,10611661663634	2.13803e-69	NRG1	neuregulin 1
ENSG00000217801	18.2052	2.30119	3,08779114867873	7.26255e-12	RP11-465B22.3
ENSG00000079263	7.67777	1.56843	3,08311892194438	3.98653e-13	SP140	SP140 nuclear body protein
ENSG00000101311	4.32022	0.542089	3,07234782322599	8.56619e-12	FERMT1	fermitin family member 1
ENSG00000255830	4.32616	0.515697	3,06558654964152	0.000455064	AL158206.2
ENSG00000115828	72.9615	9.63189	3,06188160552664	6.01541e-48	QPCT	glutaminyl-peptide cyclotransferase
ENSG00000105889	24.6068	3.24209	3,06091501086115	2.4207e-23	AC099759.1	STEAP family protein MGC87042
ENSG00000131459	97.9183	13.1132	3,0607108285313	2.03134e-67	GFPT2	glutamine-fructose-6-phosphate transaminase 2
ENSG00000139318	209.337	26.598	3,05807848035183	2.79011e-71	DUSP6	dual specificity phosphatase 6
ENSG00000128340	401.801	49.0634	3,05585544007061	2.21546e-72	RAC2	ras-related C3 botulinum toxin substrate 2 (rho family, small GTP binding protein Rac2)
ENSG00000157782	9.17799	0.983761	3,05425464617556	3.63321e-11	CABP1	calcium binding protein 1
ENSG00000148680	9.52673	0.991377	3,05062869434613	2.74224e-21	HTR7	5-hydroxytryptamine (serotonin) receptor 7 (adenylate cyclase-coupled)
ENSG00000175352	124.145	17.6596	3,04987877941736	4.38802e-68	NRIP3	nuclear receptor interacting protein 3
ENSG00000196611	8983.64	1169.41	3,04042825714421	7.29234e-08	MMP1	matrix metallopeptidase 1 (interstitial collagenase)
ENSG00000166171	50.3404	6.2709	3,03841921604107	8.92898e-27	DPCD	deleted in primary ciliary dyskinesia homolog (mouse)
ENSG00000138166	284.203	35.5947	3,03748982394266	1.02984e-71	DUSP5	dual specificity phosphatase 5
ENSG00000253616	12.2218	1.58246	3,03121856537742	2.84535e-06	RP11-875O11.3
ENSG00000168389	24.4505	3.26972	3,03007924577591	3.9139e-28	MFSD2A	major facilitator superfamily domain containing 2A
ENSG00000240929	8.06282	1.01487	3,02552321036260	0.000271856	RP5-998N21.5
ENSG00000138623	288.222	37.0619	3,0215970778927	8.37161e-65	SEMA7A	semaphorin 7A, GPI membrane anchor (John Milton Hagen blood group)
ENSG00000243742	123.56	20.6538	2,98949742767048	1.28862e-60	RPLP0P2	ribosomal protein, large, P0 pseudogene 2
ENSG00000134321	13.6173	3.87607	2,96262550603497	2.22886e-23	RSAD2	radical S-adenosyl methionine domain containing 2
ENSG00000130513	1137.67	152.326	2,95666714557494	5.51694e-55	GDF15	growth differentiation factor 15
ENSG00000136158	161.585	21.3746	2,9430262991565	3.53129e-65	SPRY2	sprouty homolog 2 (Drosophila)
ENSG00000115756	317.157	42.2373	2,94133674120036	2.53542e-67	HPCAL1	hippocalcin-like 1
ENSG00000130303	82.6139	12.3947	2,93766942880761	1.55901e-32	BST2	bone marrow stromal cell antigen 2
ENSG00000165891	45.0022	6.03671	2,9342950364632	1.20047e-64	E2F7	E2F transcription factor 7
ENSG00000119714	60.6134	8.09891	2,91982112249674	2.00789e-53	GPR68	G protein-coupled receptor 68
ENSG00000172137	3.01555	0.424131	2,89888793876296	0.00033066	CALB2	calbindin 2
ENSG00000140450	42.8438	5.83782	2,89215371638024	5.33281e-54	ARRDC4	arrestin domain containing 4
ENSG00000147889	114.678	17.3539	2,87406709782845	5.33659e-44	CDKN2A	cyclin-dependent kinase inhibitor 2A (melanoma, p16, inhibits CDK4)
ENSG00000074370	20.861	2.71263	2,87144950203891	8.87341e-46	ATP2A3	ATPase, Ca++ transporting, ubiquitous
ENSG00000226835	4.57493	0.680541	2,87117615280514	0.000785172	RP11-148B18.3
ENSG00000224985	6.50677	0.925133	2,85005990068247	0.00111901	RP11-297K8.2
ENSG00000138821	4.99043	0.487364	2,84862840097044	0.000137822	SLC39A8	solute carrier family 39 (zinc transporter), member 8
ENSG00000116729	2875.46	399.721	2,83058792614279	1.05974e-36	WLS	wntless homolog (Drosophila)
ENSG00000250657	18.1737	2.87	2,82762199107947	5.35279e-09	RP11-1E6.1
ENSG00000137331	760.718	114.717	2,82319066122611	1.76213e-54	IER3	immediate early response 3
ENSG00000138795	7.28802	0.947351	2,81820073403194	3.95865e-08	LEF1	lymphoid enhancer-binding factor 1
ENSG00000218857	5.96842	0.908905	2,81644538522337	1.89549e-06	RP1-209B5.2
ENSG00000111335	25.7424	4.12677	2,78252138528274	1.74735e-43	OAS2	2'-5'-oligoadenylate synthetase 2, 69/71kDa
ENSG00000115919	13.2219	2.22745	2,78252116314659	5.71929e-16	KYNU	kynureninase
ENSG00000210156	402.432	65.9947	2,77335358375979	6.77528e-20	J01415.15
ENSG00000187608	1748.48	277.933	2,77120152103487	3.17888e-49	ISG15	ISG15 ubiquitin-like modifier
ENSG00000171388	16.7355	2.79646	2,74964423797869	1.34666e-15	APLN	apelin
ENSG00000127325	3.1557	0.273325	2,74546717452691	0.000168291	BEST3	bestrophin 3
ENSG00000166825	339.419	52.0587	2,74257160150269	8.33034e-51	ANPEP	alanyl (membrane) aminopeptidase
ENSG00000138678	32.1275	7.65569	2,72957696346292	4.08312e-22	AGPAT9	1-acylglycerol-3-phosphate O-acyltransferase 9
ENSG00000133808	11.9158	2.30332	2,72630651719328	9.75313e-11	MICALCL	MICAL C-terminal like
ENSG00000207181	35.8499	5.81519	2,71432810217671	5.58049e-05	SNORA14B	small nucleolar RNA, H/ACA box 14B
ENSG00000102265	24942.2	4060.59	2,71264367888675	2.69402e-09	TIMP1	TIMP metallopeptidase inhibitor 1
ENSG00000158406	66.7299	9.7463	2,70948150527782	5.21514e-23	HIST1H4H	histone cluster 1, H4h
ENSG00000240369	56103.4	9995.63	2,70409951940921	6.70277e-22	AC114498.3
ENSG00000171621	90.5065	14.6392	2,69472653391897	1.91216e-46	SPSB1	splA/ryanodine receptor domain and SOCS box containing 1
ENSG00000154133	28.2142	6.96321	2,6944956439467	1.12886e-26	ROBO4	roundabout homolog 4, magic roundabout (Drosophila)
ENSG00000246981	2.48736	0.409957	2,69186314217392	6.83856e-05	AL139044.1
ENSG00000233461	28.2894	4.29489	2,68086788939862	3.76232e-09	RP11-295G20.2
ENSG00000157601	356.73	66.2727	2,67642320062880	2.5124e-55	MX1	myxovirus (influenza virus) resistance 1, interferon-inducible protein p78 (mouse)
ENSG00000130775	39.2471	5.77765	2,6692751671168	5.31414e-23	C1orf38	chromosome 1 open reading frame 38
ENSG00000137825	33.3028	5.67454	2,65763346497077	2.93637e-24	ITPKA	inositol 1,4,5-trisphosphate 3-kinase A
ENSG00000185745	53.4236	9.18581	2,65298312482692	4.43165e-42	IFIT1	interferon-induced protein with tetratricopeptide repeats 1
ENSG00000103647	101.065	16.6148	2,6448662009487	2.06492e-54	CORO2B	coronin, actin binding protein, 2B
ENSG00000143786	84.3429	14.3134	2,64008277594095	1.51666e-47	CNIH3	cornichon homolog 3 (Drosophila)
ENSG00000237753	3.65729	0.606988	2,63854698203816	2.05644e-06	AC079922.3
ENSG00000228172	26.6115	4.95571	2,63260699938175	2.1037e-10	RP1-317E23.3
ENSG00000210135	62419.7	11737.9	2,62750964811398	6.97901e-19	J01415.10
ENSG00000255282	12.3452	2.41897	2,61727359118100	6.30657e-07	RP11-725K16.4
ENSG00000187479	23.5525	4.13262	2,61012103091286	1.96114e-24	C11orf96	chromosome 11 open reading frame 96
ENSG00000176170	226.297	39.3214	2,59541622391068	3.97505e-53	SPHK1	sphingosine kinase 1
ENSG00000158125	6.15124	1.13299	2,58359778270380	1.26072e-10	XDH	xanthine dehydrogenase
ENSG00000226087	6.55987	1.17205	2,58141439538237	0.000420528	AC106869.2
ENSG00000184232	187.776	32.3759	2,57513443994945	4.56364e-51	OAF	OAF homolog (Drosophila)
ENSG00000105649	50.3271	9.23857	2,57337330582501	5.03461e-23	RAB3A	RAB3A, member RAS oncogene family
ENSG00000162511	2.91314	0.57488	2,57101709102578	0.000136524	LAPTM5	lysosomal protein transmembrane 5
ENSG00000233559	3.19542	0.568004	2,56967371928815	7.63889e-05	AC016831.7
ENSG00000173334	52.67	9.56358	2,56749135505896	3.09245e-42	TRIB1	tribbles homolog 1 (Drosophila)
ENSG00000169306	6.48694	1.04339	2,56411631170938	4.44099e-12	IL1RAPL1	interleukin 1 receptor accessory protein-like 1
ENSG00000210127	145071	28199.3	2,56292410745135	2.9259e-09	J01415.9
ENSG00000233384	8.32829	1.52907	2,55855563896243	0.000803909	RP11-100E13.1
ENSG00000244275	158947	30995.2	2,55760636345202	1.89402e-08	AC114498.8
ENSG00000103710	9.8179	2.06446	2,55541799560117	3.15509e-13	RASL12	RAS-like, family 12
ENSG00000240756	159170	31177.2	2,55084573785367	2.13727e-08	AL132988.2
ENSG00000163131	48.4775	7.98324	2,5504356681592	2.25618e-27	CTSS	cathepsin S
ENSG00000164687	14.6635	2.63194	2,54815290367279	2.39262e-09	FABP5	fatty acid binding protein 5 (psoriasis-associated)
ENSG00000252248	861.852	163.588	2,54710724357100	9.2277e-35	AC093693.1
ENSG00000170961	26.1722	5.11269	2,54033155350052	1.74083e-36	HAS2	hyaluronan synthase 2
ENSG00000189143	18.9977	2.08858	2,53881967101467	3.02332e-20	CLDN4	claudin 4
ENSG00000186480	86.3358	13.4021	2,52510189018205	1.57779e-39	INSIG1	insulin induced gene 1
ENSG00000205336	5.45507	0.987693	2,51789282266956	2.5113e-14	GPR56	G protein-coupled receptor 56
ENSG00000111252	112.874	20.1792	2,51236169417807	6.7815e-49	SH2B3	SH2B adaptor protein 3
ENSG00000079215	7.86515	1.3672	2,50961356033836	0.000243209	SLC1A3	solute carrier family 1 (glial high affinity glutamate transporter), member 3
ENSG00000238916	32185.6	6612.23	2,50667999284466	2.50361e-25	hsa-mir-1977.1	hsa-mir-1977
ENSG00000198732	25.6923	4.77102	2,50662877578713	1.51587e-36	SMOC1	SPARC related modular calcium binding 1
ENSG00000163132	8.37437	2.02915	2,50150774143035	1.12279e-07	MSX1	msh homeobox 1
ENSG00000158859	36.0428	6.23734	2,50063755548074	7.15305e-30	ADAMTS4	ADAM metallopeptidase with thrombospondin type 1 motif, 4
ENSG00000164251	55.7631	11.3753	2,48818717394426	2.14232e-36	F2RL1	coagulation factor II (thrombin) receptor-like 1
ENSG00000162631	6.73932	1.33593	2,47828546327599	1.20516e-12	NTNG1	netrin G1
ENSG00000229747	4.55902	0.883351	2,47675258405305	0.00117395	RP11-567B20.2
ENSG00000236972	28.3056	5.38241	2,47331386425629	1.77667e-08	FABP5P1	fatty acid binding protein 5 pseudogene 1
ENSG00000198168	71.21	10.776	2,47118116266689	4.97035e-22	SVIP	small VCP/p97-interacting protein
ENSG00000161133	117.177	18.1053	2,46519830859642	8.28175e-18	USP41	ubiquitin specific peptidase 41
ENSG00000163739	194.229	37.1283	2,45985877235341	5.66429e-42	CXCL1	chemokine (C-X-C motif) ligand 1 (melanoma growth stimulating activity, alpha)
ENSG00000236044	10.4361	2.03836	2,45918421266686	0.000516855	FABP5P2	fatty acid binding protein 5 pseudogene 2
ENSG00000128342	348.805	68.748	2,45277179226202	7.613e-44	LIF	leukemia inhibitory factor (cholinergic differentiation factor)
ENSG00000123689	838.16	164.18	2,44986603316990	2.22232e-43	G0S2	G0/G1switch 2
ENSG00000234964	43.7851	8.35107	2,44875596895062	4.52831e-13	FABP5P7	fatty acid binding protein 5 pseudogene 7
ENSG00000224596	6.32058	2.5311	2,44474805313072	2.19963e-10	RP11-202P11.1
ENSG00000233452	4.83666	0.936902	2,43610842564191	1.25816e-05	RP11-497D6.4
ENSG00000223796	54.7909	10.4714	2,43595519213150	2.44185e-05	AC009041.2	lipase maturation factor 1 (LMF1), transcript variant 4, non-coding RNA
ENSG00000242368	323.434	65.9947	2,43338343450199	1.81987e-13	AC114498.6
ENSG00000180596	59.8145	11.6354	2,41786120037380	1.46984e-19	HIST1H2BC	histone cluster 1, H2bc
ENSG00000135047	742.013	146.853	2,41721056407983	5.74888e-44	CTSL1	cathepsin L1
ENSG00000128578	4.32999	0.889098	2,41502599574958	1.14308e-08	FAM40B	family with sequence similarity 40, member B
ENSG00000171346	4.67872	0.899527	2,40282422731983	2.55185e-07	KRT15	keratin 15
ENSG00000158825	12.7392	2.58436	2,39376725467671	1.50509e-07	CDA	cytidine deaminase
ENSG00000102802	15.6374	2.92292	2,37634777274054	7.16886e-15	C13orf33	chromosome 13 open reading frame 33
ENSG00000196549	228.812	39.2649	2,36908692446627	2.02001e-42	MME	membrane metallo-endopeptidase
ENSG00000116396	7.08227	1.2587	2,36635382368127	1.5254e-11	KCNC4	potassium voltage-gated channel, Shaw-related subfamily, member 4
ENSG00000183929	7.47473	1.3339	2,36574116275389	2.02465e-06	DUSP5P	dual specificity phosphatase 5 pseudogene
ENSG00000229656	7.06795	1.43777	2,36486157403781	1.60651e-05	RP11-462L8.1
ENSG00000189320	37.0061	7.52275	2,36458306698769	3.9353e-25	FAM180A	family with sequence similarity 180, member A
ENSG00000117676	7.27887	1.75476	2,35707768250800	1.12267e-09	RPS6KA1	ribosomal protein S6 kinase, 90kDa, polypeptide 1
ENSG00000138442	41.1698	10.5838	2,35664254941254	1.96556e-16	WDR12	WD repeat domain 12
ENSG00000196866	12.356	2.5148	2,35241988795567	0.000483984	HIST1H2AD	histone cluster 1, H2ad
ENSG00000240764	3.05091	0.627038	2,34986670024581	4.75455e-09	PCDHGC5	protocadherin gamma subfamily C, 5
ENSG00000188029	3.43172	0.729487	2,33697955875191	0.00597315	CTSL3	cathepsin L family member 3
ENSG00000115758	177.128	37.8297	2,33321252561019	7.6118e-42	ODC1	ornithine decarboxylase 1
ENSG00000212283	52.4011	10.8708	2,32797007851508	7.57427e-05	SNORD89	small nucleolar RNA, C/D box 89
ENSG00000090339	582.26	126.722	2,32584748481270	1.54699e-31	ICAM1	intercellular adhesion molecule 1
ENSG00000197182	9.73798	1.03926	2,32510464591811	2.17115e-05	RP4-695O20__B.10	microRNA let-7b (MIRLET7B), microRNA
ENSG00000198910	26.7007	6.44237	2,32249728534723	8.46823e-18	L1CAM	L1 cell adhesion molecule
ENSG00000235495	15.5472	3.18098	2,32231049610008	0.0079145	AC010987.5
ENSG00000161653	4.26163	0.85876	2,31601149810886	2.20776e-05	NAGS	N-acetylglutamate synthase
ENSG00000197046	5.10129	1.12191	2,30216158549189	4.32303e-05	SIGLEC15	sialic acid binding Ig-like lectin 15
ENSG00000210140	124746	28813.5	2,29725688412139	4.55046e-09	J01415.11
ENSG00000187193	184.849	40.5061	2,29469396836508	8.78963e-30	MT1X	metallothionein 1X
ENSG00000095752	166.298	38.5183	2,28914896665895	9.09857e-40	IL11	interleukin 11
ENSG00000142178	7.36833	2.08957	2,28882220297536	9.50984e-16	SIK1	salt-inducible kinase 1
ENSG00000107872	10.4264	2.36935	2,27708371604331	1.06211e-13	FBXL15	F-box and leucine-rich repeat protein 15
ENSG00000028277	113.002	21.362	2,27680729182235	1.18869e-33	POU2F2	POU class 2 homeobox 2
ENSG00000164949	106.052	23.4463	2,26906987163791	1.64953e-31	GEM	GTP binding protein overexpressed in skeletal muscle
ENSG00000197142	5.03091	0.829319	2,26895640548742	1.869e-07	ACSL5	acyl-CoA synthetase long-chain family member 5
ENSG00000125845	106.518	23.4897	2,26873873419460	2.18596e-39	BMP2	bone morphogenetic protein 2
ENSG00000130066	267.711	59.3943	2,26124993497072	3.68606e-38	SAT1	spermidine/spermine N1-acetyltransferase 1
ENSG00000216133	92.9423	21.5896	2,25798030861725	0.000117743	MIR939	microRNA 939
ENSG00000178146	31.1749	7.06919	2,25193093150386	1.38187e-21	RP1-232L22__B.1
ENSG00000183621	11.0902	2.42513	2,24852082461129	7.65111e-17	ZNF438	zinc finger protein 438
ENSG00000154217	28.8187	6.36976	2,24607692322349	1.60168e-23	PITPNC1	phosphatidylinositol transfer protein, cytoplasmic 1
ENSG00000225461	14.3449	3.11366	2,24240024793063	0.000171834	RP11-525A16.4
ENSG00000244556	3.81303	0.85763	2,23622948318396	0.000155462	RP11-128A6.2
ENSG00000250562	423.269	96.3695	2,23353241516705	1.56839e-29	RP11-227H4.4
ENSG00000227288	3.55064	0.781854	2,22656348178167	0.000166122	RP5-837I24.1
ENSG00000179361	5.68488	1.31133	2,22386471058556	5.56321e-12	ARID3B	AT rich interactive domain 3B (BRIGHT-like)
ENSG00000110328	7.07211	1.57013	2,22295466871472	3.74225e-10	GALNTL4	UDP-N-acetyl-alpha-D-galactosamine:polypeptide N-acetylgalactosaminyltransferase-like 4
ENSG00000137959	10.6285	2.46967	2,21758408905719	3.11592e-08	IFI44L	interferon-induced protein 44-like
ENSG00000109321	130.05	30.9352	2,20003223298683	3.44889e-32	AREG	amphiregulin
ENSG00000220418	25.5039	5.8544	2,19895777907282	8.09306e-16	RP1-131H7.2
ENSG00000205595	97.0237	23.4475	2,19384077837369	1.06055e-30	AREGB	amphiregulin B
ENSG00000161681	57.1408	11.8291	2,18961000430831	7.80992e-30	SHANK1	SH3 and multiple ankyrin repeat domains 1
ENSG00000143256	232.52	55.1588	2,18201711064368	2.29109e-29	PFDN2	prefoldin subunit 2
ENSG00000100036	14.309	3.25567	2,17745201151116	3.61067e-15	SLC35E4	solute carrier family 35, member E4
ENSG00000165475	30.252	7.46249	2,16909319528965	1.90661e-18	CRYL1	crystallin, lambda 1
ENSG00000210176	5820.96	1490.06	2,16280865690637	9.47804e-37	J01415.18
ENSG00000139364	9.04254	1.53049	2,16146338476826	3.97794e-11	TMEM132B	transmembrane protein 132B
ENSG00000251580	20.879	4.92352	2,15512586063626	5.55619e-05	RP11-539L10.3
ENSG00000169245	24.0056	6.18848	2,15323477943317	1.6952e-13	CXCL10	chemokine (C-X-C motif) ligand 10
ENSG00000203813	6.09436	1.4267	2,14858836682133	0.0074077	HIST1H3H	histone cluster 1, H3h
ENSG00000026559	171.518	40.8925	2,14573906902724	4.38853e-36	KCNG1	potassium voltage-gated channel, subfamily G, member 1
ENSG00000123892	15.531	3.61766	2,14486424590936	5.1529e-10	RAB38	RAB38, member RAS oncogene family
ENSG00000215788	22.7006	5.37013	2,13963143692554	7.15412e-11	TNFRSF25	tumor necrosis factor receptor superfamily, member 25
ENSG00000229894	10.9238	2.67239	2,13336044107656	5.11365e-10	GK3P	glycerol kinase 3 pseudogene
ENSG00000114738	72.5349	16.2874	2,13279083764331	2.65431e-28	MAPKAPK3	mitogen-activated protein kinase-activated protein kinase 3
ENSG00000056558	15.9609	3.63165	2,12708527534604	7.49787e-23	TRAF1	TNF receptor-associated factor 1
ENSG00000229644	98.8336	23.2233	2,12390742999882	8.44075e-29	NAMPTL	nicotinamide phosphoribosyltransferase-like
ENSG00000172331	63.9797	16.6429	2,11931143412853	4.39957e-28	BPGM	2,3-bisphosphoglycerate mutase
ENSG00000155011	5.01617	1.01176	2,11712445037789	0.000337793	DKK2	dickkopf homolog 2 (Xenopus laevis)
ENSG00000256831	13.5465	3.24274	2,11536006203231	2.30306e-11	AL358252.1
ENSG00000177989	8.49676	2.93749	2,10851747732959	0.000514156	ODF3B	outer dense fiber of sperm tails 3B
ENSG00000159167	1186.49	274.595	2,10341917745873	7.14408e-16	STC1	stanniocalcin 1
ENSG00000137819	10.0548	2.43081	2,09961837705610	5.37291e-19	PAQR5	progestin and adipoQ receptor family member V
ENSG00000143384	494.091	110.256	2,09599871740419	1.43633e-29	MCL1	myeloid cell leukemia sequence 1 (BCL2-related)
ENSG00000178896	181.57	44.086	2,09571312396421	2.03851e-30	EXOSC4	exosome component 4
ENSG00000149781	10.562	4.78305	2,09442768968175	1.28247e-07	FERMT3	fermitin family member 3
ENSG00000105835	312.729	66.1961	2,09375285542634	3.54182e-32	NAMPT	nicotinamide phosphoribosyltransferase
ENSG00000158042	521.438	132.234	2,09344378705469	3.63739e-34	MRPL17	mitochondrial ribosomal protein L17
ENSG00000184678	15.5589	3.76448	2,08816301973305	2.83983e-14	HIST2H2BE	histone cluster 2, H2be
ENSG00000184979	31.4684	8.13414	2,08614436575	1.94116e-22	USP18	ubiquitin specific peptidase 18
ENSG00000240912	7.90656	1.91775	2,08183506712323	0.00958359	RP11-274J15.2
ENSG00000154102	34.9336	8.78514	2,07982540954071	1.10385e-13	C16orf74	chromosome 16 open reading frame 74
ENSG00000115648	101.412	22.8599	2,07621216530871	7.28056e-25	MLPH	melanophilin
ENSG00000120217	32.9193	9.27515	2,07370971766627	3.30991e-22	CD274	CD274 molecule
ENSG00000025772	129.775	31.569	2,07208562046873	1.57956e-32	TOMM34	translocase of outer mitochondrial membrane 34
ENSG00000197409	21.9299	4.88632	2,0714184980494	8.7577e-06	HIST1H3D	histone cluster 1, H3d
ENSG00000145358	3.60266	1.09384	2,06354549167361	0.000897189	DDIT4L	DNA-damage-inducible transcript 4-like
ENSG00000239322	5.42104	1.40102	2,06344509462609	0.00171512	AC007040.7
ENSG00000073849	7.63285	1.80122	2,05766876829312	0.001219	ST6GAL1	ST6 beta-galactosamide alpha-2,6-sialyltranferase 1
ENSG00000127507	4.71509	3.32349	2,05187177409779	2.89178e-10	EMR2	egf-like module containing, mucin-like, hormone receptor-like 2
ENSG00000239174	11590.8	2880.23	2,05116481978983	5.63498e-27	AC092143.1
ENSG00000198814	28.9535	6.37713	2,04440086852729	4.06176e-18	GK	glycerol kinase
ENSG00000134955	10.0146	2.48091	2,04407902428773	4.46477e-10	SLC37A2	solute carrier family 37 (glycerol-3-phosphate transporter), member 2
ENSG00000212724	23.6041	5.89816	2,04275197238087	1.23469e-09	KRTAP2-3	keratin associated protein 2-3
ENSG00000124635	40.3141	9.77486	2,04118136982519	6.81766e-09	HIST1H2BJ	histone cluster 1, H2bj
ENSG00000255888	1229.07	315.99	2,03760227679197	5.43041e-32	AL591806.1
ENSG00000172927	126.027	35.7926	2,03053067308344	6.8742e-19	MYEOV	myeloma overexpressed (in a subset of t(11;14) positive multiple myelomas)
ENSG00000166922	69.6477	17.8964	2,02728835678827	1.47532e-19	SCG5	secretogranin V (7B2 protein)
ENSG00000110852	15.5967	4.13657	2,02255633481269	1.65063e-07	CLEC2B	C-type lectin domain family 2, member B
ENSG00000182378	152.314	38.6306	2,01926130185534	3.9444e-27	PLCXD1	phosphatidylinositol-specific phospholipase C, X domain containing 1
ENSG00000137965	44.9816	12.713	2,01433622035659	4.8815e-14	IFI44	interferon-induced protein 44
ENSG00000180884	8.08932	2.12564	2,00814696378916	6.97389e-10	ZNF792	zinc finger protein 792
ENSG00000213417	8.372	2.1379	2,00327124246202	0.000608414	KRTAP2-4	keratin associated protein 2-4
ENSG00000178718	3.71944	0.97129	1,99980232509899	0.00111725	RPP25	ribonuclease P/MRP 25kDa subunit
ENSG00000125848	7.30248	1.86761	1,99913535990270	4.44395e-09	FLRT3	fibronectin leucine rich transmembrane protein 3
ENSG00000028137	86.0255	29.1028	1,99910630384706	2.9059e-20	TNFRSF1B	tumor necrosis factor receptor superfamily, member 1B
ENSG00000152413	8.9385	2.58219	1,98525281996310	4.74928e-08	HOMER1	homer homolog 1 (Drosophila)
ENSG00000134107	69.3863	18.6734	1,98344105945740	4.09337e-28	BHLHE40	basic helix-loop-helix family, member e40
ENSG00000198211	483.101	127.527	1,98226915491630	5.11773e-28	TUBB3	tubulin, beta 3
ENSG00000216490	43.6721	11.6298	1,97983818312673	6.55251e-16	IFI30	interferon, gamma-inducible protein 30
ENSG00000187642	6.88759	1.72515	1,97798602666989	6.35224e-05	C1orf170	chromosome 1 open reading frame 170
ENSG00000146409	7.72448	2.21049	1,97364152880142	4.88981e-05	C6orf192	chromosome 6 open reading frame 192
ENSG00000160570	47.2721	12.7453	1,97294945204455	3.21323e-23	DEDD2	death effector domain containing 2
ENSG00000171471	145.037	39.0413	1,9705807465813	9.78255e-26	MAP1LC3B2	microtubule-associated protein 1 light chain 3 beta 2
ENSG00000173846	117.525	33.8275	1,967123938268	4.93911e-29	PLK3	polo-like kinase 3
ENSG00000137767	54.1018	15.0156	1,96246893752956	6.06426e-24	SQRDL	sulfide quinone reductase-like (yeast)
ENSG00000183578	2.39115	0.641368	1,95966475284620	0.00179304	TNFAIP8L3	tumor necrosis factor, alpha-induced protein 8-like 3
ENSG00000184588	36.0876	18.5309	1,95715646366018	1.54221e-19	PDE4B	phosphodiesterase 4B, cAMP-specific
ENSG00000106537	10.3182	2.69157	1,95547385916278	7.30644e-06	TSPAN13	tetraspanin 13
ENSG00000121895	21.6061	6.07132	1,95399240864914	7.15877e-12	TMEM156	transmembrane protein 156
ENSG00000101255	216.173	57.2893	1,95374492967626	1.21347e-29	TRIB3	tribbles homolog 3 (Drosophila)
ENSG00000131188	20.3515	5.5822	1,95144575447624	3.96055e-10	PRR7	proline rich 7 (synaptic)
ENSG00000170545	64.9177	17.6993	1,94966970223830	3.77197e-20	SMAGP	small cell adhesion glycoprotein
ENSG00000124279	7.75844	1.49401	1,94770100289375	0.000767813	FASTKD3	FAST kinase domains 3
ENSG00000210191	4002.72	1211.14	1,94768831637930	5.11773e-28	J01415.20
ENSG00000233440	39.7372	10.793	1,94581710417063	6.13476e-15	HMGA1P6	high mobility group AT-hook 1 pseudogene 6
ENSG00000242114	29.4546	7.81009	1,93924082462348	3.3949e-11	MTFP1	mitochondrial fission process 1
ENSG00000100003	61.438	17.3988	1,93845610786369	1.90661e-18	SEC14L2	SEC14-like 2 (S. cerevisiae)
ENSG00000212725	16.6997	4.32006	1,93730516032388	0.000552627	KRTAP2-1	keratin associated protein 2-1
ENSG00000214518	16.3943	4.21694	1,9359611775181	0.000758272	AC100808.1	Putative keratin-associated protein ENSP00000381495
ENSG00000240666	15.315	4.16853	1,93189127082924	0.00107902	RP11-270G15.2
ENSG00000196331	10.3704	2.86549	1,93170730878823	0.00402633	HIST1H2BO	histone cluster 1, H2bo
ENSG00000169248	6.09025	1.60879	1,92851798809053	0.00177477	CXCL11	chemokine (C-X-C motif) ligand 11
ENSG00000172061	5.52021	1.65692	1,92801199095497	3.41367e-12	LRRC15	leucine rich repeat containing 15
ENSG00000168404	16.043	4.45756	1,92590313837778	1.41207e-13	MLKL	mixed lineage kinase domain-like
ENSG00000210049	6905.04	2084.93	1,92276670890094	4.03414e-28	J01415.2
ENSG00000012061	423.765	107.204	1,91179166853132	9.46969e-29	ERCC1	excision repair cross-complementing rodent repair deficiency, complementation group 1 (includes overlapping antisense sequence)
ENSG00000167772	235.889	66.1441	1,91121603470809	3.4381e-28	ANGPTL4	angiopoietin-like 4
ENSG00000163814	181.464	49.9724	1,90965963640541	1.2183e-24	CDCP1	CUB domain containing protein 1
ENSG00000171223	157.63	44.3402	1,90965853868269	2.4263e-28	JUNB	jun B proto-oncogene
ENSG00000169258	16.102	4.53671	1,90951582444753	2.99102e-18	GPRIN1	G protein regulated inducer of neurite outgrowth 1
ENSG00000111331	27.102	7.63267	1,90404454003556	2.15353e-26	OAS3	2'-5'-oligoadenylate synthetase 3, 100kDa
ENSG00000197019	64.3633	18.4138	1,89947240855313	9.04918e-25	SERTAD1	SERTA domain containing 1
ENSG00000214140	3.13326	0.972006	1,89882147878774	0.00353079	PRCD	progressive rod-cone degeneration
ENSG00000166396	65.1366	29.8728	1,89417861665866	1.39769e-20	SERPINB7	serpin peptidase inhibitor, clade B (ovalbumin), member 7
ENSG00000110031	144.974	39.4775	1,88976506656536	1.32847e-25	LPXN	leupaxin
ENSG00000128805	192.524	48.8794	1,88555875852357	4.56132e-27	ARHGAP22	Rho GTPase activating protein 22
ENSG00000173221	224.2	60.5501	1,88241939832097	3.4862e-25	GLRX	glutaredoxin (thioltransferase)
ENSG00000228612	29.5957	8.2346	1,8815625689224	2.80773e-20	HK2P1	hexokinase 2 pseudogene 1
ENSG00000147394	10.4546	2.14264	1,88057265136975	1.98566e-10	ZNF185	zinc finger protein 185 (LIM domain)
ENSG00000131435	668.776	192.327	1,87015403652141	7.17916e-27	PDLIM4	PDZ and LIM domain 4
ENSG00000159239	33.2504	9.66094	1,86748012250984	3.20063e-12	C2orf81	chromosome 2 open reading frame 81
ENSG00000146592	15.2851	2.71432	1,86599311938809	2.92326e-07	CREB5	cAMP responsive element binding protein 5
ENSG00000006459	7.23081	1.36294	1,85832829458728	8.84542e-08	JHDM1D	jumonji C domain containing histone demethylase 1 homolog D (S. cerevisiae)
ENSG00000198888	1953.71	603.712	1,85799902508329	4.08613e-17	MT-ND1	mitochondrially encoded NADH dehydrogenase 1
ENSG00000188643	869.897	250.156	1,85775566640285	1.41928e-24	S100A16	S100 calcium binding protein A16
ENSG00000101000	39.3634	11.7221	1,85554758432153	1.52612e-16	PROCR	protein C receptor, endothelial
ENSG00000207395	151.906	43.8255	1,85012260959673	9.87746e-08	Y_RNA.629	Y RNA
ENSG00000137309	1928.8	561.365	1,84954557302898	1.0292e-13	HMGA1	high mobility group AT-hook 1
ENSG00000210144	160295	50507.8	1,84815122478663	0.000122198	J01415.12
ENSG00000102032	10.5078	3.13682	1,84745821364947	0.000126025	RENBP	renin binding protein
ENSG00000234289	162.779	47.5398	1,84399880057960	6.45673e-17	H2BFS	H2B histone family, member S
ENSG00000174939	22.9389	6.67559	1,84239035040459	5.6309e-10	ASPHD1	aspartate beta-hydroxylase domain containing 1
ENSG00000198840	2036.38	644.055	1,83540504580952	3.04428e-23	MT-ND3	mitochondrially encoded NADH dehydrogenase 3
ENSG00000247809	3.59694	1.0576	1,83507204300152	0.00129312	AC016251.2
ENSG00000159399	73.3511	22.6907	1,83388350748695	5.65305e-26	HK2	hexokinase 2
ENSG00000233822	9.95281	2.7697	1,83089617319229	0.00792168	HIST1H2BN	histone cluster 1, H2bn
ENSG00000228234	50.5387	15.296	1,82565107556567	4.85742e-07	AL109614.1
ENSG00000256632	13.0722	3.92919	1,82278813588701	2.64779e-05	RP13-672B3.2	cDNA FLJ54922
ENSG00000168273	129.671	33.4379	1,82041411851498	1.01858e-12	C3orf78	chromosome 3 open reading frame 78
ENSG00000225972	786.905	250.117	1,81709670109991	2.53229e-25	RP5-857K21.9
ENSG00000253368	664.573	194.564	1,81536840534418	6.53531e-24	TRNP1	TMF1-regulated nuclear protein 1
ENSG00000125454	10.6884	3.33846	1,81348337561897	6.89557e-07	SLC25A19	solute carrier family 25 (mitochondrial thiamine pyrophosphate carrier), member 19
ENSG00000173926	46.5978	13.421	1,81322339272544	1.50321e-14	MARCH3	membrane-associated ring finger (C3HC4) 3
ENSG00000025708	30.1358	9.21265	1,80968421030994	7.26445e-14	TYMP	thymidine phosphorylase
ENSG00000166342	4.39785	1.3227	1,80907273202217	4.78504e-05	NETO1	neuropilin (NRP) and tolloid (TLL)-like 1
ENSG00000122641	363.217	87.9987	1,80496369678479	7.01172e-22	INHBA	inhibin, beta A
ENSG00000139725	21.3578	6.58036	1,8049299916671	2.28248e-07	RHOF	ras homolog gene family, member F (in filopodia)
ENSG00000113504	7.87913	2.06995	1,80190180802151	9.70136e-06	SLC12A7	solute carrier family 12 (potassium/chloride transporters), member 7
ENSG00000059758	29.2424	8.94517	1,79824524846487	3.92361e-19	CDK17	cyclin-dependent kinase 17
ENSG00000145247	102.692	32.8728	1,79645496759286	1.09706e-11	OCIAD2	OCIA domain containing 2
ENSG00000119917	37.4587	11.9151	1,79560987801904	3.80984e-18	IFIT3	interferon-induced protein with tetratricopeptide repeats 3
ENSG00000140941	126.771	38.4658	1,79514366563098	1.37644e-24	MAP1LC3B	microtubule-associated protein 1 light chain 3 beta
ENSG00000122378	7.05811	1.98119	1,79121030228770	0.000749155	C10orf58	chromosome 10 open reading frame 58
ENSG00000179862	23.3448	7.29541	1,79054122214744	2.14326e-10	CITED4	Cbp/p300-interacting transactivator, with Glu/Asp-rich carboxy-terminal domain, 4
ENSG00000105825	2320.94	697.108	1,78995714500994	1.24122e-15	TFPI2	tissue factor pathway inhibitor 2
ENSG00000175182	30.3829	9.63972	1,77997834770984	4.56944e-12	FAM131A	family with sequence similarity 131, member A
ENSG00000174791	71.3022	21.9855	1,77308180052995	1.79942e-21	RIN1	Ras and Rab interactor 1
ENSG00000197903	380.097	115.02	1,76563931030148	7.92211e-23	HIST1H2BK	histone cluster 1, H2bk
ENSG00000183828	29.4471	9.23471	1,76472220831114	1.08215e-08	NUDT14	nudix (nucleoside diphosphate linked moiety X)-type motif 14
ENSG00000133805	131.739	42.7698	1,76233433589983	2.41359e-22	AMPD3	adenosine monophosphate deaminase 3
ENSG00000183486	18.6569	8.28404	1,75959261143085	6.49426e-09	MX2	myxovirus (influenza virus) resistance 2 (mouse)
ENSG00000163874	39.6883	14.2385	1,75106172117159	1.30927e-17	ZC3H12A	zinc finger CCCH-type containing 12A
ENSG00000066379	18.7416	5.96771	1,75027161284943	1.85487e-06	ZNRD1	zinc ribbon domain containing 1
ENSG00000162415	2.53306	1.40797	1,74615438251989	0.000141543	ZSWIM5	zinc finger, SWIM-type containing 5
ENSG00000185507	45.3989	13.5175	1,74129866663012	2.37081e-15	IRF7	interferon regulatory factor 7
ENSG00000217930	73.652	23.7048	1,74046699390562	1.72019e-12	PAM16	presequence translocase-associated motor 16 homolog (S. cerevisiae)
ENSG00000225630	334.433	111.999	1,73858229815885	4.04359e-23	RP5-857K21.8
ENSG00000172031	7.57499	2.41162	1,73140425816835	0.000130329	EPHX4	epoxide hydrolase 4
ENSG00000233155	592.475	188.22	1,73117957630214	8.50153e-22	HMGA1P8	high mobility group AT-hook 1 pseudogene 8
ENSG00000186352	29.133	9.2788	1,72784911496999	3.17699e-07	ANKRD37	ankyrin repeat domain 37
ENSG00000131016	40.9908	13.2106	1,72371690914148	3.31554e-22	AKAP12	A kinase (PRKA) anchor protein 12
ENSG00000213409	21.1187	6.5494	1,72073111446666	2.81702e-07	RP11-658F2.3
ENSG00000179859	4.33439	1.36112	1,71795879702677	3.87615e-05	AC025335.1
ENSG00000198763	1323.6	449.105	1,71664425717267	1.16504e-16	MT-ND2	mitochondrially encoded NADH dehydrogenase 2
ENSG00000136997	84.9253	26.336	1,71108705909231	3.42217e-19	MYC	v-myc myelocytomatosis viral oncogene homolog (avian)
ENSG00000196878	57.427	18.769	1,71074447804747	2.34427e-20	LAMB3	laminin, beta 3
ENSG00000185262	65.7174	21.2483	1,70543175899334	1.90661e-18	FAM100B	family with sequence similarity 100, member B
ENSG00000164430	2.41753	0.794607	1,70522672648288	0.00557895	MB21D1	Mab-21 domain containing 1
ENSG00000205639	44.2479	13.7293	1,70225926776846	4.31873e-13	MFSD2B	major facilitator superfamily domain containing 2B
ENSG00000175197	111.751	35.5605	1,69422232056619	7.53102e-18	DDIT3	DNA-damage-inducible transcript 3
ENSG00000123810	8.70855	2.86445	1,69243114145845	0.000698686	B9D2	B9 protein domain 2
ENSG00000197697	21.3147	6.93642	1,68481494286606	0.000181502	HIST1H2BE	histone cluster 1, H2be
ENSG00000115267	8.38868	2.52574	1,68255606495981	1.2415e-07	IFIH1	interferon induced with helicase C domain 1
ENSG00000131737	3.67711	1.2012	1,67968517394966	0.00428205	KRT34	keratin 34
ENSG00000243329	941.752	334.861	1,671338595516	4.86681e-16	AC114498.7
ENSG00000198768	215.031	68.7679	1,66813286339179	1.29766e-21	APCDD1L	adenomatosis polyposis coli down-regulated 1-like
ENSG00000134802	146.25	47.7865	1,66770589626155	4.27566e-20	SLC43A3	solute carrier family 43, member 3
ENSG00000234465	3.26395	1.10247	1,66554776393946	0.00106029	AC006276.1
ENSG00000230091	2.26535	0.766825	1,66512394737045	0.000881967	RP11-369J21.5
ENSG00000197329	5.05575	2.72962	1,66302093045554	0.000559095	PELI1	pellino homolog 1 (Drosophila)
ENSG00000248641	504.202	167.67	1,66256035101632	1.54221e-19	HMGA1P2	high mobility group AT-hook 1 pseudogene 2
ENSG00000113552	84.9549	25.8032	1,66148265002658	4.51883e-16	GNPDA1	glucosamine-6-phosphate deaminase 1
ENSG00000236683	300.444	103.671	1,66106189837248	6.97901e-19	HMGA1P1	high mobility group AT-hook 1 pseudogene 1
ENSG00000173848	30.6182	9.1034	1,65148311910377	1.59877e-10	NET1	neuroepithelial cell transforming 1
ENSG00000210196	3553.98	1263.47	1,65098228298559	1.89757e-21	J01415.23
ENSG00000198142	9.04483	2.97661	1,64649083513526	6.66383e-11	ANKRD57	ankyrin repeat domain 57
ENSG00000156345	7.98125	2.62374	1,64302641210659	6.15652e-06	CDK20	cyclin-dependent kinase 20
ENSG00000116285	386.028	129.528	1,64145729214183	5.76119e-18	ERRFI1	ERBB receptor feedback inhibitor 1
ENSG00000160888	85.3607	28.4448	1,63808429891695	1.76084e-19	IER2	immediate early response 2
ENSG00000176422	22.343	8.18894	1,63503898509491	1.47478e-07	SPRYD4	SPRY domain containing 4
ENSG00000255137	69.8908	22.4901	1,63438453100701	0.000333024	RP11-290D2.4	small nucleolar RNA, H/ACA box 31 (SNORA31), small nucleolar RNA
ENSG00000118242	18.573	7.41138	1,63410232959972	0.000101136	MREG	melanoregulin
ENSG00000103152	188.545	68.6136	1,63216544732918	5.30031e-19	MPG	N-methylpurine-DNA glycosylase
ENSG00000125637	2.96952	0.988868	1,63185048831965	0.00344676	PSD4	pleckstrin and Sec7 domain containing 4
ENSG00000140263	18.2819	6.33295	1,6280968621051	1.71246e-11	SORD	sorbitol dehydrogenase
ENSG00000017483	246.677	88.2369	1,62734080067047	1.48046e-19	SLC38A5	solute carrier family 38, member 5
ENSG00000138642	36.9276	11.7704	1,62396140834744	4.43728e-13	HERC6	hect domain and RLD 6
ENSG00000163584	153.051	52.6297	1,62293230307940	4.35178e-15	RPL22L1	ribosomal protein L22-like 1
ENSG00000172590	197.432	66.962	1,62052167283853	5.81672e-17	MRPL52	mitochondrial ribosomal protein L52
ENSG00000171421	183.547	64.6339	1,61649226189756	6.80948e-17	MRPL36	mitochondrial ribosomal protein L36
ENSG00000187583	15.5156	5.34626	1,61513196189200	1.67837e-08	PLEKHN1	pleckstrin homology domain containing, family N member 1
ENSG00000247626	11.4932	3.90097	1,61144971484329	1.13108e-07	MARS2	methionyl-tRNA synthetase 2, mitochondrial
ENSG00000112139	47.7858	15.0918	1,60746067489193	2.14315e-14	MDGA1	MAM domain containing glycosylphosphatidylinositol anchor 1
ENSG00000210174	5664.74	2123.81	1,60731846070680	2.61887e-20	J01415.17
ENSG00000226505	12.9258	4.56105	1,60667228494515	0.00169057	AC016700.3
ENSG00000242670	37.4927	13.4757	1,60506086678672	7.81977e-05	RP11-601I15.1
ENSG00000102312	41.959	14.0244	1,60481117918323	2.48307e-12	PORCN	porcupine homolog (Drosophila)
ENSG00000182118	15.5094	5.28349	1,60327132135635	2.17398e-06	FAM89A	family with sequence similarity 89, member A
ENSG00000184451	4.15328	1.43994	1,59984865920038	0.00267827	CCR10	chemokine (C-C motif) receptor 10
ENSG00000207765	5883.58	2082.02	1,59983919929757	6.23982e-18	AL132780.1
ENSG00000144792	22.265	6.68036	1,59747856968435	2.31872e-05	ZNF660	zinc finger protein 660
ENSG00000256802	2.42279	0.836601	1,59629432933043	0.00807203	AC022613.1
ENSG00000147894	5.62023	2.22023	1,59557429750135	0.00120636	C9orf72	chromosome 9 open reading frame 72
ENSG00000229647	12.0754	4.15275	1,59267384717373	0.000681675	AC007879.7
ENSG00000136235	25.978	8.53255	1,59158170118571	1.72687e-09	GPNMB	glycoprotein (transmembrane) nmb
ENSG00000118503	110.083	37.6162	1,58994963301699	1.10997e-17	TNFAIP3	tumor necrosis factor, alpha-induced protein 3
ENSG00000110104	114.316	37.5764	1,58987866343603	5.48557e-17	CCDC86	coiled-coil domain containing 86
ENSG00000175866	21.1685	7.60611	1,58770669960381	2.71127e-11	BAIAP2	BAI1-associated protein 2
ENSG00000080819	23.3937	8.24767	1,58767287742383	1.31579e-08	CPOX	coproporphyrinogen oxidase
ENSG00000130707	36.1227	12.6247	1,58648370608991	1.91445e-07	ASS1	argininosuccinate synthase 1
ENSG00000115998	16.9007	5.23276	1,58512458033975	0.00011653	C2orf42	chromosome 2 open reading frame 42
ENSG00000167106	89.3362	31.8292	1,58483721518002	1.56926e-16	FAM102A	family with sequence similarity 102, member A
ENSG00000185022	190.052	64.8097	1,57979998786680	1.82376e-18	MAFF	v-maf musculoaponeurotic fibrosarcoma oncogene homolog F (avian)
ENSG00000116761	8.11078	2.59903	1,57890277690985	0.00257738	CTH	cystathionase (cystathionine gamma-lyase)
ENSG00000188766	12.2509	4.46783	1,57814574291793	1.45719e-05	SPRED3	sprouty-related, EVH1 domain containing 3
ENSG00000142634	108.611	37.7601	1,57769242472571	1.82285e-18	EFHD2	EF-hand domain family, member D2
ENSG00000177675	15.7789	8.23137	1,57604838261665	3.60535e-06	CD163L1	CD163 molecule-like 1
ENSG00000119630	4.48353	1.75114	1,57562409335180	0.0045017	PGF	placental growth factor
ENSG00000210107	930.655	352.451	1,57064393539376	1.50462e-14	J01415.6
ENSG00000162892	28.2852	7.91563	1,57059684774902	2.72418e-05	IL24	interleukin 24
ENSG00000166592	57.0398	20.7888	1,56705855556403	8.69423e-15	RRAD	Ras-related associated with diabetes
ENSG00000114023	72.316	25.859	1,56392466696715	2.4311e-11	FAM162A	family with sequence similarity 162, member A
ENSG00000067066	243.075	79.9197	1,56181867361703	1.10997e-17	SP100	SP100 nuclear antigen
ENSG00000196460	25.5097	6.63594	1,55774185914831	7.15226e-05	RFX8	regulatory factor X, 8
ENSG00000074410	10.903	4.01125	1,55521538791965	1.20211e-09	CA12	carbonic anhydrase XII
ENSG00000023445	20.6042	6.98336	1,55483299916382	4.94344e-09	BIRC3	baculoviral IAP repeat containing 3
ENSG00000010278	619.42	223.092	1,55411422979415	4.39675e-18	CD9	CD9 molecule
ENSG00000198825	38.122	13.1832	1,55183207912623	3.92415e-16	INPP5F	inositol polyphosphate-5-phosphatase F
ENSG00000106686	6.67642	3.4126	1,54994403332744	0.00266798	C9orf68	chromosome 9 open reading frame 68
ENSG00000117289	376.65	133.062	1,54693411206300	2.92844e-17	TXNIP	thioredoxin interacting protein
ENSG00000156711	63.7831	22.6792	1,54547634176767	2.31842e-13	MAPK13	mitogen-activated protein kinase 13
ENSG00000104689	30.8433	10.7808	1,54359038885818	1.72216e-07	TNFRSF10A	tumor necrosis factor receptor superfamily, member 10a
ENSG00000099341	259.398	95.5393	1,54212251780798	4.49711e-18	PSMD8	proteasome (prosome, macropain) 26S subunit, non-ATPase, 8
ENSG00000182117	388.436	142.311	1,54196811050250	1.09991e-17	NOP10	NOP10 ribonucleoprotein homolog (yeast)
ENSG00000249499	4.00351	1.49752	1,53847030880567	0.00485787	AC097104.1
ENSG00000228264	41.1434	15.2728	1,5314421097207	3.9793e-08	RP11-350G8.7
ENSG00000112759	23.5102	8.14353	1,52853995231022	6.78907e-11	SLC29A1	solute carrier family 29 (nucleoside transporters), member 1
ENSG00000251257	22.2164	7.99302	1,52748508263368	0.00439937	CTD-2263F21.1
ENSG00000164929	194.321	65.8426	1,52684970184814	9.08896e-15	BAALC	brain and acute leukemia, cytoplasmic
ENSG00000225392	28.3731	10.5097	1,5253583026438	0.00189201	AC016700.4
ENSG00000172250	12.1003	4.98124	1,52339429735870	7.47208e-05	SERHL	serine hydrolase-like
ENSG00000147684	156.276	60.2064	1,52164235582318	5.58514e-15	NDUFB9	NADH dehydrogenase (ubiquinone) 1 beta subcomplex, 9, 22kDa
ENSG00000198355	48.1308	17.5831	1,52103655333028	8.92712e-14	PIM3	pim-3 oncogene
ENSG00000133961	171.842	60.4177	1,51797675553546	1.12629e-17	NUMB	numb homolog (Drosophila)
ENSG00000164850	10.8617	3.6954	1,51731154233254	1.06366e-05	GPER	G protein-coupled estrogen receptor 1
ENSG00000171617	60.9923	21.4255	1,51671581694769	9.41644e-17	ENC1	ectodermal-neural cortex 1 (with BTB-like domain)
ENSG00000198225	1992.94	711.693	1,51487889140047	4.36496e-16	FKBP1C	FK506 binding protein 1C
ENSG00000108179	278.517	98.4991	1,51179539686032	1.33551e-17	PPIF	peptidylprolyl isomerase F
ENSG00000124508	31.9057	11.8473	1,50994470395303	1.40604e-11	BTN2A2	butyrophilin, subfamily 2, member A2
ENSG00000156587	193.989	73.3096	1,50955624770735	1.53342e-16	UBE2L6	ubiquitin-conjugating enzyme E2L 6
ENSG00000147509	34.8758	12.5508	1,50153631575831	9.76693e-09	RGS20	regulator of G-protein signaling 20
ENSG00000118939	53.0082	18.9789	1,49970200333601	2.59603e-09	UCHL3	ubiquitin carboxyl-terminal esterase L3 (ubiquitin thiolesterase)
ENSG00000102096	10.0395	3.65025	1,49734420880292	6.82337e-05	PIM2	pim-2 oncogene
ENSG00000210077	3005.7	1226.39	1,49389021231694	1.48233e-15	J01415.3
ENSG00000244921	14.8283	5.90865	1,49288229814913	0.000696541	CTB-36O1.7
ENSG00000146205	4.49836	1.77884	1,49045570995837	0.00601258	ANO7	anoctamin 7
ENSG00000083454	7.97714	2.95536	1,49005714376328	9.79921e-05	P2RX5	purinergic receptor P2X, ligand-gated ion channel, 5
ENSG00000233929	4930.13	1886.84	1,48981555124490	8.31696e-15	MT1XP1	metallothionein 1X pseudogene 1
ENSG00000040487	49.1416	18.1895	1,48942216393971	8.88265e-13	PQLC2	PQ loop repeat containing 2
ENSG00000232358	8.07375	2.99414	1,48905192363743	0.00858308	RP5-955M13.4
ENSG00000181649	366.75	137.445	1,48851705434102	2.63547e-17	PHLDA2	pleckstrin homology-like domain, family A, member 2
ENSG00000139289	666.055	204.291	1,48700270037508	1.54774e-12	PHLDA1	pleckstrin homology-like domain, family A, member 1
ENSG00000185033	46.0005	17.2735	1,48246064184493	8.47972e-16	SEMA4B	sema domain, immunoglobulin domain (Ig), transmembrane domain (TM) and short cytoplasmic domain, (semaphorin) 4B
ENSG00000180992	92.0099	35.7896	1,48206103993108	3.35451e-13	MRPL14	mitochondrial ribosomal protein L14
ENSG00000125144	131.744	50.5817	1,48016628436768	1.54799e-10	MT1G	metallothionein 1G
ENSG00000151474	114.742	43.7156	1,47949083556324	1.58615e-16	FRMD4A	FERM domain containing 4A
ENSG00000175730	28.215	10.7597	1,47907014862673	1.81023e-07	BAK1P1	BCL2-antagonist/killer 1 pseudogene 1
ENSG00000116133	61.2975	22.0797	1,47714079687496	3.96901e-16	DHCR24	24-dehydrocholesterol reductase
ENSG00000145819	13.1625	8.26635	1,47551611160757	0.000249656	ARHGAP26	Rho GTPase activating protein 26
ENSG00000138411	26.2271	5.21157	1,47459049384716	3.45996e-07	HECW2	HECT, C2 and WW domain containing E3 ubiquitin protein ligase 2
ENSG00000023330	89.1779	32.2091	1,47378949940489	2.33483e-15	ALAS1	aminolevulinate, delta-, synthase 1
ENSG00000158882	20.581	8.19912	1,47316043517338	5.10698e-08	TOMM40L	translocase of outer mitochondrial membrane 40 homolog (yeast)-like
ENSG00000126709	2349.47	901.375	1,47116653243819	4.06494e-10	IFI6	interferon, alpha-inducible protein 6
ENSG00000108788	40.3272	15.6648	1,46897214065858	1.5236e-13	MLX	MAX-like protein X
ENSG00000142684	8.935	3.46182	1,46692269047129	5.30387e-05	ZNF593	zinc finger protein 593
ENSG00000084070	111.581	43.8354	1,46634553754131	3.60664e-16	SMAP2	small ArfGAP2
ENSG00000163162	46.9664	18.5193	1,46444606381755	3.63088e-12	RNF149	ring finger protein 149
ENSG00000127124	7.09259	4.78458	1,46151772063150	6.73353e-10	HIVEP3	human immunodeficiency virus type I enhancer binding protein 3
ENSG00000184374	15.0444	5.71073	1,46090999846655	2.22157e-05	COLEC10	collectin sub-family member 10 (C-type lectin)
ENSG00000002549	132.24	50.0916	1,45969888836385	1.42659e-14	LAP3	leucine aminopeptidase 3
ENSG00000030110	31.0074	11.9328	1,45342008950757	1.2367e-10	BAK1	BCL2-antagonist/killer 1
ENSG00000127080	10.1931	3.96773	1,45192362401034	5.62603e-06	IPPK	inositol 1,3,4,5,6-pentakisphosphate 2-kinase
ENSG00000155465	6.60194	2.32364	1,45184731933798	0.000610189	SLC7A7	solute carrier family 7 (cationic amino acid transporter, y+ system), member 7
ENSG00000173267	39.4367	14.9785	1,45128063642748	5.64013e-07	SNCG	synuclein, gamma (breast cancer-specific protein 1)
ENSG00000125827	51.6759	18.6162	1,44872095903171	1.71778e-14	TMX4	thioredoxin-related transmembrane protein 4
ENSG00000144339	8.09072	3.52673	1,44869074656615	0.000905552	TMEFF2	transmembrane protein with EGF-like and two follistatin-like domains 2
ENSG00000226593	57.5729	22.6032	1,44676847742426	4.18147e-08	AC004258.1	Uncharacterized membrane protein C19orf24
ENSG00000027001	20.2844	8.92837	1,44649047274462	1.76995e-06	MIPEP	mitochondrial intermediate peptidase
ENSG00000188313	89.63	33.0865	1,44324067279647	4.04496e-10	PLSCR1	phospholipid scramblase 1
ENSG00000144655	59.9728	23.686	1,43958248186502	2.63143e-14	CSRNP1	cysteine-serine-rich nuclear protein 1
ENSG00000075914	66.2728	24.5856	1,43857955266294	7.02407e-08	EXOSC7	exosome component 7
ENSG00000249684	11.2678	4.7341	1,43790575397059	0.00960063	RP11-423H2.3
ENSG00000135245	26.7584	10.9689	1,43787580869762	5.44605e-07	C7orf68	chromosome 7 open reading frame 68
ENSG00000183260	16.3362	6.10724	1,43625438972918	6.28319e-07	ABHD16B	abhydrolase domain containing 16B
ENSG00000236782	55.5844	22.3986	1,43428188139273	4.86884e-07	RP11-96L14.7
ENSG00000116106	43.8033	18.2408	1,43401379535073	1.25691e-09	EPHA4	EPH receptor A4
ENSG00000196497	32.3159	12.5367	1,43259403937899	1.52927e-13	IPO4	importin 4
ENSG00000168209	137.905	55.5929	1,43159069524888	1.20241e-14	DDIT4	DNA-damage-inducible transcript 4
ENSG00000185838	22.2609	7.54589	1,43085313280768	1.12922e-06	GNB1L	guanine nucleotide binding protein (G protein), beta polypeptide 1-like
ENSG00000182500	77.5787	29.0295	1,43080463490824	5.0566e-13	ORAI1	ORAI calcium release-activated calcium modulator 1
ENSG00000165233	175.399	66.531	1,42995727612339	7.0949e-13	C9orf89	chromosome 9 open reading frame 89
ENSG00000007376	42.4201	16.61	1,42936243404391	1.42384e-12	RPUSD1	RNA pseudouridylate synthase domain containing 1
ENSG00000185420	47.341	19.3466	1,42831519749908	3.70257e-08	SMYD3	SET and MYND domain containing 3
ENSG00000107159	14.4665	6.2091	1,42709407136832	0.000247995	CA9	carbonic anhydrase IX
ENSG00000145194	6.64505	2.60226	1,42705115968203	0.000706287	ECE2	endothelin converting enzyme 2
ENSG00000088832	1366.47	510.802	1,42629864468182	7.5426e-13	FKBP1A	FK506 binding protein 1A, 12kDa
ENSG00000068079	93.0146	37.1002	1,42607087444238	1.52937e-10	IFI35	interferon-induced protein 35
ENSG00000108561	108.492	43.0873	1,42569190695949	1.62174e-13	C1QBP	complement component 1, q subcomponent binding protein
ENSG00000185885	701.154	282.559	1,42521390261224	1.56565e-15	IFITM1	interferon induced transmembrane protein 1 (9-27)
ENSG00000140961	18.9454	7.14221	1,42137828401645	2.83839e-08	OSGIN1	oxidative stress induced growth inhibitor 1
ENSG00000178695	9.61374	3.59731	1,41909467655463	5.13703e-09	KCTD12	potassium channel tetramerisation domain containing 12
ENSG00000108010	182.657	69.5816	1,41806930595338	1.7649e-12	GLRX3	glutaredoxin 3
ENSG00000052749	42.1832	15.4091	1,41714757030221	3.37889e-13	RRP12	ribosomal RNA processing 12 homolog (S. cerevisiae)
ENSG00000128891	15.4201	6.28067	1,41629924794402	2.67499e-06	C15orf57	chromosome 15 open reading frame 57
ENSG00000174564	12.566	4.79473	1,4133539359709	4.56747e-06	IL20RB	interleukin 20 receptor beta
ENSG00000175832	30.9563	12.2759	1,41310343668932	3.75516e-10	ETV4	ets variant 4
ENSG00000059378	54.4329	20.6309	1,41259655889024	4.26461e-11	PARP12	poly (ADP-ribose) polymerase family, member 12
ENSG00000247627	195.926	82.0712	1,41020670987049	3.11138e-15	CTB-36O1.5
ENSG00000148803	39.8235	16.8294	1,40912350807249	4.0949e-06	C10orf125	chromosome 10 open reading frame 125
ENSG00000197548	112.996	41.5961	1,40691684956325	9.64562e-13	ATG7	ATG7 autophagy related 7 homolog (S. cerevisiae)
ENSG00000011422	282.56	113.126	1,40581507363484	5.4279e-15	PLAUR	plasminogen activator, urokinase receptor
ENSG00000147416	115.572	44.2786	1,40579464729291	2.67321e-14	ATP6V1B2	ATPase, H+ transporting, lysosomal 56/58kDa, V1 subunit B2
ENSG00000232829	47.8127	19.757	1,40321339549363	3.89245e-07	GSTO3P	glutathione S-transferase omega 3, pseudogene
ENSG00000183336	50.7759	20.3938	1,40198154450122	2.36345e-09	BOLA2	bolA homolog 2 (E. coli)
ENSG00000162772	60.6565	26.1493	1,40175044506492	1.46549e-11	ATF3	activating transcription factor 3
ENSG00000165175	69.4855	27.4768	1,40174358517824	6.21412e-14	MID1IP1	MID1 interacting protein 1 (gastrulation specific G12 homolog (zebrafish))
ENSG00000053372	93.5106	38.0882	1,40094095241658	6.43512e-12	MRTO4	mRNA turnover 4 homolog (S. cerevisiae)
ENSG00000220771	114.878	46.9916	1,39794181605232	2.23229e-06	RP3-322L4.2
ENSG00000125148	2587.54	1061.76	1,39741685574593	7.82797e-09	MT2A	metallothionein 2A
ENSG00000163840	16.6552	6.42622	1,39703868163321	7.36585e-10	DTX3L	deltex 3-like (Drosophila)
ENSG00000106266	230.548	91.8871	1,39601945522773	4.44269e-14	SNX8	sorting nexin 8
ENSG00000147383	33.8577	14.1496	1,39585474356777	3.31457e-09	NSDHL	NAD(P) dependent steroid dehydrogenase-like
ENSG00000169218	13.5145	5.78372	1,39579164006273	2.57979e-07	RSPO1	R-spondin homolog (Xenopus laevis)
ENSG00000106367	303.275	123.686	1,39524838510162	1.1309e-14	AP1S1	adaptor-related protein complex 1, sigma 1 subunit
ENSG00000244642	39.3336	16.8504	1,3940901724618	0.00678111	AP005717.1
ENSG00000231525	14.732	5.90452	1,38979586878749	0.00744858	AC002486.2
ENSG00000101109	21.0728	7.50795	1,38357882549021	5.75009e-11	STK4	serine/threonine kinase 4
ENSG00000166900	18.8342	7.20029	1,38158827006568	1.54768e-06	STX3	syntaxin 3
ENSG00000153485	9.64968	3.82087	1,38128987261722	0.00429833	C14orf109	chromosome 14 open reading frame 109
ENSG00000161011	1787.76	704.39	1,37906857473109	4.16467e-09	SQSTM1	sequestosome 1
ENSG00000179115	102.748	42.2586	1,37708503163892	5.84342e-14	FARSA	phenylalanyl-tRNA synthetase, alpha subunit
ENSG00000137872	10.4987	3.9942	1,37606870436246	1.15763e-09	SEMA6D	sema domain, transmembrane domain (TM), and cytoplasmic domain, (semaphorin) 6D
ENSG00000096433	13.8775	5.44714	1,37541023124690	3.25528e-13	ITPR3	inositol 1,4,5-triphosphate receptor, type 3
ENSG00000164967	31.0261	12.8789	1,37538974389234	1.93374e-06	C9orf23	chromosome 9 open reading frame 23
ENSG00000148834	457.505	193.755	1,37478573489735	8.19469e-14	GSTO1	glutathione S-transferase omega 1
ENSG00000106153	305.865	127.858	1,37440990300116	3.09699e-14	CHCHD2	coiled-coil-helix-coiled-coil-helix domain containing 2
ENSG00000109519	102.91	39.2087	1,37379036502533	1.1653e-11	GRPEL1	GrpE-like 1, mitochondrial (E. coli)
ENSG00000213761	71.6897	29.6636	1,37161515512722	2.76047e-06	MT1P1	metallothionein 1 pseudogene 1
ENSG00000218350	27.3636	11.02	1,36847070960250	7.36689e-05	RP11-789A7.1
ENSG00000198923	74.8818	30.8125	1,36843767347690	0.000462869	AC011611.1
ENSG00000209082	22725.7	9850.26	1,36700772663135	3.19824e-09	J01415.1
ENSG00000111674	469.316	192.19	1,36599333628010	5.90082e-14	ENO2	enolase 2 (gamma, neuronal)
ENSG00000075223	92.4527	39.6918	1,36214646177868	7.43588e-12	SEMA3C	sema domain, immunoglobulin domain (Ig), short basic domain, secreted, (semaphorin) 3C
ENSG00000111981	15.5278	6.04892	1,36200988314688	1.48244e-07	ULBP1	UL16 binding protein 1
ENSG00000099250	130.57	56.5568	1,36023233582163	7.04962e-14	NRP1	neuropilin 1
ENSG00000006451	141.622	45.3084	1,35894173413854	2.07611e-13	RALA	v-ral simian leukemia viral oncogene homolog A (ras related)
ENSG00000241482	1670.39	715.888	1,35888545749571	5.65343e-14	AC064836.1
ENSG00000072210	12.6262	5.98973	1,35823112820133	0.00165721	ALDH3A2	aldehyde dehydrogenase 3 family, member A2
ENSG00000161010	392.41	146.294	1,35732702724727	4.29011e-14	C5orf45	chromosome 5 open reading frame 45
ENSG00000136244	329.855	155.536	1,35623977928508	1.70797e-12	IL6	interleukin 6 (interferon, beta 2)
ENSG00000067177	4.94434	1.95363	1,35591792940435	7.92602e-06	PHKA1	phosphorylase kinase, alpha 1 (muscle)
ENSG00000231344	55.988	23.5129	1,35190414812171	7.1887e-05	RP3-426I6.2
ENSG00000128524	305.381	128.681	1,34963585227159	1.19429e-13	ATP6V1F	ATPase, H+ transporting, lysosomal 14kDa, V1 subunit F
ENSG00000120992	146.007	55.3949	1,34671471935169	5.56223e-10	LYPLA1	lysophospholipase I
ENSG00000162840	27070.6	11487.7	1,34610528746835	0.000124738	MT1P2	metallothionein 1 pseudogene 2
ENSG00000132109	30.4039	13.1685	1,34396165051102	8.09865e-09	TRIM21	tripartite motif containing 21
ENSG00000166401	113.269	36.528	1,34289115597404	2.60115e-12	SERPINB8	serpin peptidase inhibitor, clade B (ovalbumin), member 8
ENSG00000136891	24.6455	10.0753	1,33905498924837	2.8702e-09	TEX10	testis expressed 10
ENSG00000181773	4.71522	1.94014	1,33855783929146	0.00404269	GPR3	G protein-coupled receptor 3
ENSG00000196358	5.61712	2.48203	1,33555582676718	0.000587377	NTNG2	netrin G2
ENSG00000155090	53.3888	21.765	1,33516361890714	9.05896e-13	KLF10	Kruppel-like factor 10
ENSG00000228797	25.816	11.0049	1,33476476276584	0.00111882	RP11-484H12.7
ENSG00000169715	239.773	101.702	1,33423700903122	1.01858e-12	MT1E	metallothionein 1E
ENSG00000156113	39.7445	9.53114	1,33359956148322	1.61211e-10	KCNMA1	potassium large conductance calcium-activated channel, subfamily M, alpha member 1
ENSG00000178660	12.4698	5.37498	1,33357980891317	0.00379156	RP11-668N23.1
ENSG00000117410	578.361	236.919	1,33308404931383	2.09098e-13	ATP6V0B	ATPase, H+ transporting, lysosomal 21kDa, V0 subunit b
ENSG00000160213	290.073	119.707	1,33238892554628	2.84628e-13	CSTB	cystatin B (stefin B)
ENSG00000244288	150.808	66.6007	1,33023870568173	7.08301e-07	AC090360.1
ENSG00000161642	12.8734	5.38719	1,33009533706085	4.58443e-06	ZNF385A	zinc finger protein 385A
ENSG00000186940	128.937	55.2448	1,32810915030993	2.42173e-09	CHCHD9	coiled-coil-helix-coiled-coil-helix domain containing 9
ENSG00000213638	7.96298	3.24371	1,32735448488002	0.0018626	ADAT3	adenosine deaminase, tRNA-specific 3, TAD3 homolog (S. cerevisiae)
ENSG00000204386	72.1695	29.991	1,32725494167832	4.04906e-12	NEU1	sialidase 1 (lysosomal sialidase)
ENSG00000252229	33269.1	14794.8	1,32469628960961	3.04663e-06	AC098691.1
ENSG00000146232	26.6807	11.1694	1,32335174579326	2.4473e-09	NFKBIE	nuclear factor of kappa light polypeptide gene enhancer in B-cells inhibitor, epsilon
ENSG00000136718	144.343	56.4218	1,32065296388802	9.50066e-12	IMP4	IMP4, U3 small nucleolar ribonucleoprotein, homolog (yeast)
ENSG00000212907	7720.4	3428.75	1,32033412111645	2.4277e-07	MT-ND4L	mitochondrially encoded NADH dehydrogenase 4L
ENSG00000235084	277.762	119.831	1,32012359735802	9.01982e-12	RP4-680D5.3
ENSG00000248527	1247.46	558.266	1,32005443893853	1.94142e-11	RP5-857K21.10
ENSG00000137692	72.7327	31.0429	1,31769673398978	8.47204e-09	DCUN1D5	DCN1, defective in cullin neddylation 1, domain containing 5 (S. cerevisiae)
ENSG00000205863	32.3226	9.16979	1,31742667725819	0.00344981	RP11-45B20.2	Complement C1q tumor necrosis factor-related protein 9B
ENSG00000089195	17.3663	6.96834	1,31633890919493	2.20776e-05	TRMT6	tRNA methyltransferase 6 homolog (S. cerevisiae)
ENSG00000226138	88.441	38.0617	1,31612811972003	1.19267e-06	AC004801.1
ENSG00000125630	26.2887	10.3712	1,3126464107646	3.11793e-07	POLR1B	polymerase (RNA) I polypeptide B, 128kDa
ENSG00000205413	7.95459	3.18893	1,31199134634510	5.37685e-08	SAMD9	sterile alpha motif domain containing 9
ENSG00000144827	32.0102	12.8397	1,31099924556717	1.0522e-06	ABHD10	abhydrolase domain containing 10
ENSG00000143479	21.5444	9.31765	1,31048803722461	5.89034e-07	DYRK3	dual-specificity tyrosine-(Y)-phosphorylation regulated kinase 3
ENSG00000198886	3064.85	1372.93	1,309794727938	7.07967e-05	MT-ND4	mitochondrially encoded NADH dehydrogenase 4
ENSG00000161036	86.7151	42.0341	1,30942897228567	6.42662e-11	LRWD1	leucine-rich repeats and WD repeat domain containing 1
ENSG00000120306	83.2759	34.4556	1,30892525093679	4.80573e-09	C5orf32	chromosome 5 open reading frame 32
ENSG00000167378	12.0132	4.96189	1,30804589401103	2.8039e-11	IRGQ	immunity-related GTPase family, Q
ENSG00000239672	260.145	113.421	1,30790654481256	1.99877e-12	NME1	non-metastatic cells 1, protein (NM23A) expressed in
ENSG00000213500	25.3656	10.8748	1,30694345390741	1.05336e-06	RP1-193M11.1
ENSG00000215006	164.428	71.3974	1,30514847162078	1.48732e-08	RP11-1113N2.3
ENSG00000148426	29.2554	11.0744	1,30315705497416	4.43419e-06	C10orf47	chromosome 10 open reading frame 47
ENSG00000145723	5.34283	4.8829	1,30237056455191	0.00467991	GIN1	gypsy retrotransposon integrase 1
ENSG00000140598	17.2224	7.29417	1,30018791520561	8.19951e-09	EFTUD1	elongation factor Tu GTP binding domain containing 1
ENSG00000179431	90.3418	39.0423	1,29898497191474	1.70797e-12	FJX1	four jointed box 1 (Drosophila)
ENSG00000143450	34.6755	16.9584	1,29836464954549	0.00264572	OAZ3	ornithine decarboxylase antizyme 3
ENSG00000151014	44.7318	19.189	1,29820656986120	1.67089e-08	CCRN4L	CCR4 carbon catabolite repression 4-like (S. cerevisiae)
ENSG00000123095	8.23741	4.47193	1,29748482031513	0.00708682	BHLHE41	basic helix-loop-helix family, member e41
ENSG00000198899	3847.33	1749.99	1,29719695740406	1.66514e-06	MT-ATP6	mitochondrially encoded ATP synthase 6
ENSG00000137547	92.6792	40.2989	1,29698158792713	1.6876e-09	MRPL15	mitochondrial ribosomal protein L15
ENSG00000081059	19.8874	7.94604	1,29689762225256	1.30272e-05	TCF7	transcription factor 7 (T-cell specific, HMG-box)
ENSG00000181924	58.3004	24.372	1,29628498040011	5.232e-07	CHCHD8	coiled-coil-helix-coiled-coil-helix domain containing 8
ENSG00000138435	9.23634	4.02643	1,29421467565976	0.000573227	CHRNA1	cholinergic receptor, nicotinic, alpha 1 (muscle)
ENSG00000199631	138.802	60.5202	1,29384155993639	0.00315348	SNORD33	small nucleolar RNA, C/D box 33
ENSG00000177606	120.617	50.858	1,29356591505013	1.20714e-12	JUN	jun proto-oncogene
ENSG00000172216	168.839	71.9661	1,29305849962810	1.42213e-12	CEBPB	CCAAT/enhancer binding protein (C/EBP), beta
ENSG00000054967	10.9726	4.70889	1,29238464607262	8.14555e-05	RELT	RELT tumor necrosis factor receptor
ENSG00000244187	57.7165	26.0354	1,29191133075920	3.91343e-07	TMEM141	transmembrane protein 141
ENSG00000107020	24.6699	11.6044	1,28992789488033	0.000764298	C9orf46	chromosome 9 open reading frame 46
ENSG00000160256	36.826	16.7352	1,28802675148716	9.03311e-06	C21orf70	chromosome 21 open reading frame 70
ENSG00000226380	15.2988	7.21358	1,28591797155512	0.000880383	AC058791.1
ENSG00000239935	3767.68	1714.6	1,28425427221271	7.41621e-11	AC116340.1
ENSG00000231290	40.4262	21.605	1,28379546606496	5.55417e-07	RP5-907D15.2
ENSG00000129235	37.5845	16.4815	1,2823045274961	1.04401e-09	TXNDC17	thioredoxin domain containing 17
ENSG00000143878	195.877	84.1444	1,28174970685972	2.72795e-12	RHOB	ras homolog gene family, member B
ENSG00000210100	1734.19	791.884	1,28153299326526	2.27819e-13	J01415.5
ENSG00000179094	11.645	4.79514	1,27808782460835	6.46925e-08	PER1	period homolog 1 (Drosophila)
ENSG00000126602	59.7914	26.2171	1,27792646298593	2.29267e-11	TRAP1	TNF receptor-associated protein 1
ENSG00000128626	66.4877	28.8233	1,27706611308178	5.63389e-09	MRPS12	mitochondrial ribosomal protein S12
ENSG00000070669	192.978	82.6872	1,27695671096254	1.02325e-11	ASNS	asparagine synthetase (glutamine-hydrolyzing)
ENSG00000229344	784.278	362.19	1,27652343168786	6.55765e-12	RP5-857K21.7
ENSG00000252318	5693.62	2589.42	1,27647151073345	1.41602e-11	AC097532.1
ENSG00000211448	3.66467	1.4976	1,27498896376652	0.0031822	DIO2	deiodinase, iodothyronine, type II
ENSG00000214575	6.81349	2.56787	1,27355511060558	0.000844269	CPEB1	cytoplasmic polyadenylation element binding protein 1
ENSG00000167977	44.5751	19.2415	1,27312509611286	1.01748e-10	KCTD5	potassium channel tetramerisation domain containing 5
ENSG00000115415	374.92	156.171	1,27290373246922	4.52147e-11	STAT1	signal transducer and activator of transcription 1, 91kDa
ENSG00000124444	30.2118	12.5447	1,27284323913957	7.78348e-06	ZNF576	zinc finger protein 576
ENSG00000236281	36.1456	16.2281	1,27215531132982	0.000429385	AC093106.5
ENSG00000213337	19.334	8.18977	1,27144856147050	0.000186426	ANKRD39	ankyrin repeat domain 39
ENSG00000151229	4.87817	2.14771	1,27111117965912	2.71451e-05	SLC2A13	solute carrier family 2 (facilitated glucose transporter), member 13
ENSG00000005448	88.3415	39.659	1,27073053015800	4.7783e-09	WDR54	WD repeat domain 54
ENSG00000162685	55.5942	24.7584	1,26782681123533	0.00385312	CTD-2269E23.1
ENSG00000085231	112.809	48.674	1,26779784487038	2.10413e-10	TAF9	TAF9 RNA polymerase II, TATA box binding protein (TBP)-associated factor, 32kDa
ENSG00000100344	9.27201	3.57728	1,26733411745817	0.00264572	PNPLA3	patatin-like phospholipase domain containing 3
ENSG00000229230	7693.25	3335.51	1,26671618640458	4.77706e-10	AL121753.1
ENSG00000140548	22.9826	9.78953	1,26576167377187	1.65932e-10	ZNF710	zinc finger protein 710
ENSG00000251948	35595.7	16261.9	1,26555658995128	2.42392e-05	AC092279.1
ENSG00000105656	47.7885	27.0453	1,26405955569513	8.14915e-10	ELL	elongation factor RNA polymerase II
ENSG00000168275	22.416	9.92577	1,26199092178962	0.000769606	C1orf31	chromosome 1 open reading frame 31
ENSG00000147010	79.1127	26.1471	1,26131692357878	1.94674e-11	SH3KBP1	SH3-domain kinase binding protein 1
ENSG00000077348	17.0328	7.58662	1,25983093344335	0.000624343	EXOSC5	exosome component 5
ENSG00000172070	87.0016	37.5005	1,25873584247344	5.36193e-12	SRXN1	sulfiredoxin 1
ENSG00000130165	103.726	46.0048	1,25836912551314	1.89413e-10	ELOF1	elongation factor 1 homolog (S. cerevisiae)
ENSG00000100228	9.77767	4.64146	1,25792660005572	3.6802e-05	RAB36	RAB36, member RAS oncogene family
ENSG00000169627	52.9893	23.5819	1,25777475849086	6.99594e-08	BOLA2B	bolA homolog 2B (E. coli)
ENSG00000100294	24.2862	11.3857	1,25688745834363	3.3028e-05	MCAT	malonyl CoA:ACP acyltransferase (mitochondrial)
ENSG00000066583	24.8054	10.9484	1,25644029736347	5.66225e-05	ISOC1	isochorismatase domain containing 1
ENSG00000178105	62.7489	33.6332	1,25635139371511	4.86928e-07	DDX10	DEAD (Asp-Glu-Ala-Asp) box polypeptide 10
ENSG00000144021	88.5507	36.3879	1,25479358572491	6.02434e-11	CIAO1	cytosolic iron-sulfur protein assembly 1
ENSG00000163565	51.2781	23.6972	1,25347352274383	6.09794e-10	IFI16	interferon, gamma-inducible protein 16
ENSG00000255967	16.2623	7.1809	1,25222372049612	6.1453e-07	RP11-438L7.3
ENSG00000185627	248.364	118.651	1,25005850171409	1.71246e-11	PSMD13	proteasome (prosome, macropain) 26S subunit, non-ATPase, 13
ENSG00000139629	51.0275	22.3956	1,24990691387406	6.26143e-12	GALNT6	UDP-N-acetyl-alpha-D-galactosamine:polypeptide N-acetylgalactosaminyltransferase 6 (GalNAc-T6)
ENSG00000116514	25.3468	10.6449	1,24928737112836	1.29071e-07	RNF19B	ring finger protein 19B
ENSG00000226328	20.0119	9.37111	1,24849892256957	0.000560426	CTA-217C2.1
ENSG00000198712	6393.41	3011.4	1,24848112836571	0.000285049	MT-CO2	mitochondrially encoded cytochrome c oxidase II
ENSG00000158158	9.55605	4.73918	1,24834013549645	1.52695e-05	CNNM4	cyclin M4
ENSG00000069493	43.1281	14.7937	1,24413940051544	0.000165872	CLEC2D	C-type lectin domain family 2, member D
ENSG00000183628	17.4727	8.06696	1,24327447340492	0.00182674	DGCR6	DiGeorge syndrome critical region gene 6
ENSG00000172366	24.8695	10.8292	1,24139075303828	0.000252578	FAM195A	family with sequence similarity 195, member A
ENSG00000114268	20.3335	10.191	1,24109138005605	7.13409e-07	PFKFB4	6-phosphofructo-2-kinase/fructose-2,6-biphosphatase 4
ENSG00000177820	74.9612	33.5943	1,24050453132609	5.1351e-09	AC004917.1
ENSG00000146386	28.8617	12.9353	1,23840395323606	0.000108959	C6orf115	chromosome 6 open reading frame 115
ENSG00000171453	72.145	30.182	1,23446224979383	7.89462e-07	POLR1C	polymerase (RNA) I polypeptide C, 30kDa
ENSG00000176887	3.4435	1.51567	1,23334315692064	2.35151e-05	SOX11	SRY (sex determining region Y)-box 11
ENSG00000004478	71.7474	30.7058	1,23252702938621	9.12384e-10	FKBP4	FK506 binding protein 4, 59kDa
ENSG00000233608	35.2672	15.7949	1,23230269818517	1.30726e-06	TWIST2	twist homolog 2 (Drosophila)
ENSG00000122140	139.563	60.7085	1,23117297595404	1.2695e-10	MRPS2	mitochondrial ribosomal protein S2
ENSG00000122965	18.5651	8.01883	1,23063453278817	1.30442e-08	RBM19	RNA binding motif protein 19
ENSG00000011198	74.5297	32.3934	1,22969305111996	4.85495e-08	ABHD5	abhydrolase domain containing 5
ENSG00000126456	79.6908	36.1514	1,22957434951489	2.32877e-08	IRF3	interferon regulatory factor 3
ENSG00000137507	6.47394	2.85417	1,22856126390078	0.00139351	LRRC32	leucine rich repeat containing 32
ENSG00000114767	32.1826	14.5426	1,22844317310110	2.47939e-07	RRP9	ribosomal RNA processing 9, small subunit (SSU) processome component, homolog (yeast)
ENSG00000101444	137.673	63.2344	1,22798394841887	1.67017e-11	AHCY	adenosylhomocysteinase
ENSG00000247077	48.2328	21.1802	1,22576272298262	1.24208e-07	PGAM5	phosphoglycerate mutase family member 5
ENSG00000204308	46.383	20.4616	1,22573823796366	1.51175e-05	RNF5	ring finger protein 5
ENSG00000116663	12.9458	6.13396	1,22508926343784	0.00242372	FBXO6	F-box protein 6
ENSG00000156110	46.6342	20.2817	1,22434711019995	2.36196e-07	ADK	adenosine kinase
ENSG00000135899	40.9673	19.0633	1,22430075235290	1.76295e-06	SP110	SP110 nuclear body protein
ENSG00000132507	523.841	239.455	1,22395227372628	2.47538e-10	EIF5A	eukaryotic translation initiation factor 5A
ENSG00000178531	30.7804	13.9375	1,22392604335152	2.67938e-06	CTXN1	cortexin 1
ENSG00000164823	13.9463	5.88676	1,22295234222507	8.21502e-06	OSGIN2	oxidative stress induced growth inhibitor family member 2
ENSG00000216657	34.9064	16.136	1,21977379656051	8.18581e-06	RP3-406P24.1
ENSG00000170632	15.7363	8.13373	1,21838005602217	1.89247e-05	ARMC10	armadillo repeat containing 10
ENSG00000073756	35.3527	16.8206	1,21799640415310	1.12906e-09	PTGS2	prostaglandin-endoperoxide synthase 2 (prostaglandin G/H synthase and cyclooxygenase)
ENSG00000089159	425.938	183.032	1,21767852545201	2.49005e-10	PXN	paxillin
ENSG00000164849	10.2019	4.3599	1,21749934367288	0.00211971	GPR146	G protein-coupled receptor 146
ENSG00000183048	125.828	59.5954	1,21603563563757	3.12005e-10	SLC25A10	solute carrier family 25 (mitochondrial carrier; dicarboxylate transporter), member 10
ENSG00000106683	211.24	95.1119	1,21561027393000	2.49298e-11	LIMK1	LIM domain kinase 1
ENSG00000198018	8.69902	4.06794	1,21476795357707	0.000244131	ENTPD7	ectonucleoside triphosphate diphosphohydrolase 7
ENSG00000125445	45.5972	20.8937	1,21465771848522	5.20858e-08	MRPS7	mitochondrial ribosomal protein S7
ENSG00000170727	79.7994	36.2452	1,21378720353145	9.44017e-10	BOP1	block of proliferation 1
ENSG00000165688	75.3627	35.4018	1,21314009473297	1.6149e-10	PMPCA	peptidase (mitochondrial processing) alpha
ENSG00000136950	80.7382	36.0693	1,21224959003373	1.41742e-09	ARPC5L	actin related protein 2/3 complex, subunit 5-like
ENSG00000148908	108.702	44.6579	1,21132337754627	2.54069e-07	RGS10	regulator of G-protein signaling 10
ENSG00000170619	33.1618	14.6263	1,21004898492005	4.283e-06	COMMD5	COMM domain containing 5
ENSG00000175550	672.229	310.468	1,20798600337413	9.07425e-11	DRAP1	DR1-associated protein 1 (negative cofactor 2 alpha)
ENSG00000184060	6.75478	3.10826	1,20735192941466	0.00244472	ADAP2	ArfGAP with dual PH domains 2
ENSG00000178607	9.04451	3.9667	1,20581098461293	7.73145e-06	ERN1	endoplasmic reticulum to nucleus signaling 1
ENSG00000165886	55.7891	25.3803	1,20572891416418	2.11092e-09	UBTD1	ubiquitin domain containing 1
ENSG00000198727	1950.5	943.048	1,20434470687396	3.19995e-06	MT-CYB	mitochondrially encoded cytochrome b
ENSG00000204775	37.689	17.0424	1,20424686281964	1.21177e-08	AC145291.1	KM-PA-2 protein
ENSG00000154146	16.3877	7.54121	1,20356122696821	0.000363699	NRGN	neurogranin (protein kinase C substrate, RC3)
ENSG00000095209	32.1032	13.8934	1,20329067834826	0.000117641	TMEM38B	transmembrane protein 38B
ENSG00000171033	24.9216	10.8785	1,20276471459003	4.1707e-05	PKIA	protein kinase (cAMP-dependent, catalytic) inhibitor alpha
ENSG00000213190	24.0466	10.9833	1,20131270592426	4.98051e-09	MLLT11	myeloid/lymphoid or mixed-lineage leukemia (trithorax homolog, Drosophila); translocated to, 11
ENSG00000143067	15.2311	6.76299	1,20088395393109	1.8754e-08	ZNF697	zinc finger protein 697
ENSG00000242372	508.01	236.877	1,20088345280289	8.6501e-11	EIF6	eukaryotic translation initiation factor 6
ENSG00000171159	132.14	61.5954	1,19872224865746	8.06513e-09	C9orf16	chromosome 9 open reading frame 16
ENSG00000142252	19.8482	9.26508	1,19851694319476	1.95526e-05	GEMIN7	gem (nuclear organelle) associated protein 7
ENSG00000228285	50.872	23.3135	1,19757390190194	1.01639e-05	LYPLA2P1	lysophospholipase II pseudogene 1
ENSG00000175505	22.3694	10.3018	1,19622308789370	3.47824e-05	CLCF1	cardiotrophin-like cytokine factor 1
ENSG00000011009	98.1603	44.7515	1,19397836466198	2.08407e-09	LYPLA2	lysophospholipase II
ENSG00000088543	18.6097	7.73181	1,19270460195188	0.000979989	C3orf18	chromosome 3 open reading frame 18
ENSG00000155099	42.413	18.634	1,19257756559078	7.87383e-06	TMEM55A	transmembrane protein 55A
ENSG00000166833	31.3019	17.8898	1,1915355655992	6.99226e-07	NAV2	neuron navigator 2
ENSG00000120158	12.3491	5.34522	1,19108324532746	0.00443347	RCL1	RNA terminal phosphate cyclase-like 1
ENSG00000147454	69.8058	30.726	1,19059608842350	3.9556e-08	SLC25A37	solute carrier family 25, member 37
ENSG00000226539	15.3099	7.0897	1,18997434935584	0.00879414	AC012512.1
ENSG00000171490	46.7966	21.9093	1,18803340564975	2.20148e-08	RSL1D1	ribosomal L1 domain containing 1
ENSG00000198356	138.243	65.3108	1,18495766112438	1.86134e-10	ASNA1	arsA arsenite transporter, ATP-binding, homolog 1 (bacterial)
ENSG00000172336	66.0757	30.4443	1,18243195708242	2.19652e-06	POP7	processing of precursor 7, ribonuclease P/MRP subunit (S. cerevisiae)
ENSG00000241376	5068.03	2472.17	1,18116666025642	1.75142e-09	AL606830.1
ENSG00000187678	148.315	63.0811	1,18034141495258	7.05388e-11	SPRY4	sprouty homolog 4 (Drosophila)
ENSG00000204220	88.0913	42.1651	1,18005064027521	6.28319e-07	PFDN6	prefoldin subunit 6
ENSG00000112855	45.3584	23.0912	1,17746667492416	1.81653e-07	HARS2	histidyl-tRNA synthetase 2, mitochondrial (putative)
ENSG00000102393	49.347	23.9671	1,17656521050718	2.01072e-06	GLA	galactosidase, alpha
ENSG00000172922	54.2191	23.1685	1,17552153537698	2.43922e-06	RNASEH2C	ribonuclease H2, subunit C
ENSG00000240117	41.7556	20.2596	1,17294319965177	0.000291547	AC004448.1
ENSG00000239735	150.242	75.0155	1,17272474013649	5.07071e-05	AC116316.1
ENSG00000167515	28.8804	13.6949	1,17149498403749	1.29071e-07	TRAPPC2L	trafficking protein particle complex 2-like
ENSG00000140455	18.8957	8.5597	1,17047776740529	2.2597e-05	USP3	ubiquitin specific peptidase 3
ENSG00000160208	372.058	149.689	1,17012872404702	3.99718e-10	RRP1B	ribosomal RNA processing 1 homolog B (S. cerevisiae)
ENSG00000200121	197.365	95.909	1,17010344852631	0.00109066	Y_RNA.125	Y RNA
ENSG00000141098	15.6579	7.20102	1,17006907757453	2.3694e-05	GFOD2	glucose-fructose oxidoreductase domain containing 2
ENSG00000104979	182.133	86.6583	1,16954216753464	1.01831e-09	C19orf53	chromosome 19 open reading frame 53
ENSG00000197415	57.7197	27.5252	1,16952411093270	2.25285e-07	VEPH1	ventricular zone expressed PH domain homolog 1 (zebrafish)
ENSG00000115825	52.42	23.3983	1,16830647199451	1.54504e-08	PRKD3	protein kinase D3
ENSG00000072274	119.804	57.4297	1,16639152783941	8.54545e-10	TFRC	transferrin receptor (p90, CD71)
ENSG00000162066	19.8014	9.68812	1,16634968470286	1.80166e-05	AMDHD2	amidohydrolase domain containing 2
ENSG00000113070	16.7605	8.07492	1,16560710565545	7.64986e-05	HBEGF	heparin-binding EGF-like growth factor
ENSG00000255898	40.1508	18.7932	1,16463531900453	0.00108711	AC010336.3
ENSG00000177542	117.81	54.2257	1,16299111360665	4.66825e-09	SLC25A22	solute carrier family 25 (mitochondrial carrier: glutamate), member 22
ENSG00000221743	180.113	84.4402	1,16284258476223	0.000981309	Z95152.1
ENSG00000104312	69.0334	31.5552	1,16143589979250	1.08919e-08	RIPK2	receptor-interacting serine-threonine kinase 2
ENSG00000138835	144.525	69.0966	1,16086026609376	1.13866e-09	RGS3	regulator of G-protein signaling 3
ENSG00000057019	324.748	150.773	1,16054736944521	4.47795e-09	DCBLD2	discoidin, CUB and LCCL domain containing 2
ENSG00000176907	8.29289	4.03169	1,16034613554121	0.00372696	C8orf4	chromosome 8 open reading frame 4
ENSG00000213523	83.6999	38.7259	1,15966473722503	7.33425e-09	SRA1	steroid receptor RNA activator 1
ENSG00000084764	42.9556	20.6182	1,15944897323729	2.33195e-07	MAPRE3	microtubule-associated protein, RP/EB family, member 3
ENSG00000171823	15.874	6.73198	1,15931378550831	0.000252685	FBXL14	F-box and leucine-rich repeat protein 14
ENSG00000100418	61.2366	22.583	1,15683762173709	6.72282e-09	PPPDE2	PPPDE peptidase domain containing 2
ENSG00000253626	63.3123	30.0773	1,15631048540441	4.04496e-10	EIF5AL1	eukaryotic translation initiation factor 5A-like 1
ENSG00000126749	64.3939	30.0992	1,15613184509153	2.514e-06	EMG1	EMG1 nucleolar protein homolog (S. cerevisiae)
ENSG00000153551	35.4539	16.9968	1,15592653367052	3.83366e-05	CMTM7	CKLF-like MARVEL transmembrane domain containing 7
ENSG00000161544	71.8362	34.2452	1,15522164402856	3.26505e-09	CYGB	cytoglobin
ENSG00000243185	5483.63	2739.91	1,15424635343392	7.80059e-08	AC108078.1
ENSG00000233225	29.7243	13.7937	1,15364641358649	2.01424e-05	AC004987.9
ENSG00000187840	129.816	64.4058	1,15217160985525	4.43052e-09	EIF4EBP1	eukaryotic translation initiation factor 4E binding protein 1
ENSG00000241624	34.7875	15.7711	1,15038268859699	0.00237493	RP4-697K14.12
ENSG00000141337	6.00987	2.66874	1,14834509600359	0.00148243	ARSG	arylsulfatase G
ENSG00000099821	24.561	11.4774	1,14793259974467	1.75786e-08	POLRMT	polymerase (RNA) mitochondrial (DNA directed)
ENSG00000232992	9.67749	4.62343	1,14725260115338	0.00514522	AC023468.2
ENSG00000167065	18.4535	8.95838	1,14696570482687	0.000289959	DUSP18	dual specificity phosphatase 18
ENSG00000102804	222.727	79.4041	1,14645721314891	6.04431e-10	TSC22D1	TSC22 domain family, member 1
ENSG00000133110	45.1718	21.6238	1,14641639769396	7.5132e-09	POSTN	periostin, osteoblast specific factor
ENSG00000197345	58.9361	28.1684	1,1459352547133	2.12756e-05	MRPL21	mitochondrial ribosomal protein L21
ENSG00000143387	119.374	56.9427	1,14465693142248	5.17929e-09	CTSK	cathepsin K
ENSG00000109917	86.6114	40.5712	1,14091084744637	3.29941e-08	ZNF259	zinc finger protein 259
ENSG00000112651	84.635	40.1182	1,13920897132224	1.69116e-06	MRPL2	mitochondrial ribosomal protein L2
ENSG00000089327	467.153	227.181	1,13894390560996	8.34396e-10	FXYD5	FXYD domain containing ion transport regulator 5
ENSG00000165283	194.765	101.326	1,13808903338159	1.97542e-09	STOML2	stomatin (EPB72)-like 2
ENSG00000090020	96.3728	44.7996	1,13634997423533	5.81262e-10	SLC9A1	solute carrier family 9 (sodium/hydrogen exchanger), member 1
ENSG00000198382	17.3463	8.53557	1,13500806033476	0.000332199	UVRAG	UV radiation resistance associated gene
ENSG00000115216	134.911	68.8588	1,13469835565018	9.98444e-10	NRBP1	nuclear receptor binding protein 1
ENSG00000155380	60.7063	25.2453	1,13365674528871	2.74503e-07	SLC16A1	solute carrier family 16, member 1 (monocarboxylic acid transporter 1)
ENSG00000159228	217.318	104.035	1,13345331058371	1.21388e-09	CBR1	carbonyl reductase 1
ENSG00000071054	262.62	124.563	1,13299209281312	1.04004e-08	MAP4K4	mitogen-activated protein kinase kinase kinase kinase 4
ENSG00000099810	42.2882	17.4431	1,13281894131026	2.75468e-06	MTAP	methylthioadenosine phosphorylase
ENSG00000105676	94.8512	44.3091	1,13268938348764	1.02845e-08	ARMC6	armadillo repeat containing 6
ENSG00000139323	22.4386	9.76864	1,13173589352188	1.14745e-06	POC1B	POC1 centriolar protein homolog B (Chlamydomonas)
ENSG00000234743	354.198	170.492	1,13154275847192	2.13102e-09	RP11-36D19.5
ENSG00000185567	7.19604	3.35002	1,13143700290777	4.43491e-09	AHNAK2	AHNAK nucleoprotein 2
ENSG00000198369	50.4634	24.9193	1,13059981780378	4.0903e-08	SPRED2	sprouty-related, EVH1 domain containing 2
ENSG00000134070	14.3139	6.93274	1,12912417337234	4.40333e-06	IRAK2	interleukin-1 receptor-associated kinase 2
ENSG00000167112	42.2387	21.5603	1,12846397246067	1.29226e-06	TRUB2	TruB pseudouridine (psi) synthase homolog 2 (E. coli)
ENSG00000204438	24.9087	11.7585	1,12807424822511	9.98021e-06	GPANK1	G patch domain and ankyrin repeats 1
ENSG00000185043	106.384	52.2543	1,12683258098216	8.228e-09	CIB1	calcium and integrin binding 1 (calmyrin)
ENSG00000128311	33.9467	16.3019	1,12601068905124	9.5847e-05	TST	thiosulfate sulfurtransferase (rhodanese)
ENSG00000100612	107.323	51.9618	1,12487813563703	7.73106e-09	DHRS7	dehydrogenase/reductase (SDR family) member 7
ENSG00000160972	86.4668	41.1224	1,12454390259388	7.90744e-08	PPP1R16A	protein phosphatase 1, regulatory (inhibitor) subunit 16A
ENSG00000140474	12.929	6.2161	1,12426975879250	8.18013e-05	ULK3	unc-51-like kinase 3 (C. elegans)
ENSG00000160214	40.5751	17.0901	1,12381030772696	2.13303e-06	RRP1	ribosomal RNA processing 1 homolog (S. cerevisiae)
ENSG00000088826	131.426	63.6393	1,12377393465180	2.0996e-08	SMOX	spermine oxidase
ENSG00000131669	200.763	97.7874	1,12366075601413	1.92748e-09	NINJ1	ninjurin 1
ENSG00000122861	4190.94	2058.77	1,12304436149036	0.00576399	PLAU	plasminogen activator, urokinase
ENSG00000105447	34.5206	16.5621	1,12233630145316	9.94125e-08	GRWD1	glutamate-rich WD repeat containing 1
ENSG00000158373	44.905	21.3891	1,12228889556533	0.000236898	HIST1H2BD	histone cluster 1, H2bd
ENSG00000185883	463.084	224.484	1,12191270905280	3.85878e-09	ATP6V0C	ATPase, H+ transporting, lysosomal 16kDa, V0 subunit c
ENSG00000157538	59.1904	27.4579	1,12129862639007	6.11925e-08	DSCR3	Down syndrome critical region gene 3
ENSG00000100902	111.985	56.269	1,12042658726630	2.79341e-08	PSMA6	proteasome (prosome, macropain) subunit, alpha type, 6
ENSG00000172375	33.0363	12.8561	1,12014549466983	9.03819e-06	C2CD2L	C2CD2-like
ENSG00000051523	293.954	148.314	1,11640639049305	3.00464e-09	CYBA	cytochrome b-245, alpha polypeptide
ENSG00000249780	51.1291	26.9099	1,11593997816679	0.0021042	RP11-352E6.2
ENSG00000241800	31302.2	16351.2	1,11460367789869	7.95604e-05	AC114498.5
ENSG00000221290	325.175	163.361	1,11420520178282	9.77266e-05	MIR1182	microRNA 1182
ENSG00000108641	21.0455	11.4293	1,11273336756404	0.00578999	B9D1	B9 protein domain 1
ENSG00000130489	119.771	61.8618	1,11227414823772	2.18132e-08	SCO2	SCO cytochrome oxidase deficient homolog 2 (yeast)
ENSG00000100142	128.467	61.7642	1,11220624726354	3.86133e-07	POLR2F	polymerase (RNA) II (DNA directed) polypeptide F
ENSG00000136840	103.247	48.3838	1,11139630029256	8.71676e-08	ST6GALNAC4	ST6 (alpha-N-acetyl-neuraminyl-2,3-beta-galactosyl-1,3)-N-acetylgalactosaminide alpha-2,6-sialyltransferase 4
ENSG00000165006	35.0965	16.3066	1,11115152877069	1.37823e-07	UBAP1	ubiquitin associated protein 1
ENSG00000205794	32.958	15.3582	1,11009989681287	7.04002e-05	RP11-333E13.4	acyl-CoA thioesterase 7 pseudogene (LOC344967), non-coding RNA
ENSG00000130479	59.6319	28.268	1,11007716054488	2.28504e-09	MAP1S	microtubule-associated protein 1S
ENSG00000103043	36.2377	17.6479	1,10939118502593	3.43241e-08	VAC14	Vac14 homolog (S. cerevisiae)
ENSG00000255857	54.9444	26.7615	1,10914619724772	8.64071e-06	RP1-278C19.3
ENSG00000248795	16.8854	8.18781	1,10793794360417	0.00101958	RP11-173E2.1
ENSG00000114423	26.4308	11.9709	1,10770814054544	0.000434843	CBLB	Cas-Br-M (murine) ecotropic retroviral transforming sequence b
ENSG00000237973	1229.32	634.901	1,10534828239240	9.08336e-06	RP5-857K21.6
ENSG00000138756	15.8331	7.32036	1,10511836439203	2.39002e-05	BMP2K	BMP2 inducible kinase
ENSG00000233954	421.516	210.197	1,10432196166955	3.36859e-08	RP11-169K16.7	ubiquinol-cytochrome c reductase hinge protein-like (UQCRHL), mRNA
ENSG00000181885	14.908	6.93173	1,10377789338072	0.000343243	CLDN7	claudin 7
ENSG00000008118	24.1197	11.4372	1,10292586401136	4.53839e-05	CAMK1G	calcium/calmodulin-dependent protein kinase IG
ENSG00000198938	2628.05	1365.8	1,10282926741930	2.10281e-05	MT-CO3	mitochondrially encoded cytochrome c oxidase III
ENSG00000180573	148.801	68.7745	1,10280846268663	5.11221e-08	HIST1H2AC	histone cluster 1, H2ac
ENSG00000105514	7.99458	3.90337	1,10012042246013	9.82867e-05	RAB3D	RAB3D, member RAS oncogene family
ENSG00000039650	26.2995	13.0658	1,09960734994797	1.21471e-05	PNKP	polynucleotide kinase 3'-phosphatase
ENSG00000184557	21.4163	10.557	1,09789835117653	2.63979e-06	SOCS3	suppressor of cytokine signaling 3
ENSG00000166173	230.475	107.868	1,09776872830447	5.72886e-09	LARP6	La ribonucleoprotein domain family, member 6
ENSG00000159720	190.545	93.1758	1,09775160058150	2.17084e-09	ATP6V0D1	ATPase, H+ transporting, lysosomal 38kDa, V0 subunit d1
ENSG00000170142	137.724	66.0758	1,09699227419061	3.86865e-08	UBE2E1	ubiquitin-conjugating enzyme E2E 1 (UBC4/5 homolog, yeast)
ENSG00000100379	78.836	40.6421	1,09688974517714	5.06188e-07	KCTD17	potassium channel tetramerisation domain containing 17
ENSG00000110660	55.3172	28.541	1,09673386231054	7.35239e-07	SLC35F2	solute carrier family 35, member F2
ENSG00000174276	26.2279	12.8076	1,09642692314238	0.000335203	ZNHIT2	zinc finger, HIT-type containing 2
ENSG00000198744	927.622	482.923	1,09629341992447	7.5355e-09	RP5-857K21.11
ENSG00000177426	57.5708	28.4372	1,09525601782801	2.02139e-07	TGIF1	TGFB-induced factor homeobox 1
ENSG00000119685	9.58264	4.78426	1,09419218186530	4.05169e-05	TTLL5	tubulin tyrosine ligase-like family, member 5
ENSG00000188522	31.7409	14.7647	1,09406137337461	1.8045e-08	FAM83G	family with sequence similarity 83, member G
ENSG00000232059	68.5076	34.6196	1,09212719770840	0.00212452	RP11-173A6.2
ENSG00000130821	137.422	59.3473	1,09149961889805	3.39666e-08	SLC6A8	solute carrier family 6 (neurotransmitter transporter, creatine), member 8
ENSG00000214014	65.9259	33.7115	1,09102045754028	4.38556e-06	OVCA2	ovarian tumor suppressor candidate 2
ENSG00000066697	68.8829	34.2466	1,09017090828494	8.46089e-07	C9orf30	chromosome 9 open reading frame 30
ENSG00000226958	644.133	331.779	1,09008330452466	7.2627e-09	RN28S1	RNA, 28S ribosomal 1
ENSG00000176845	133.099	64.67	1,08977570118619	6.49217e-09	METRNL	meteorin, glial cell differentiation regulator-like
ENSG00000138363	203.64	98.1456	1,08859064948098	3.08803e-08	ATIC	5-aminoimidazole-4-carboxamide ribonucleotide formyltransferase/IMP cyclohydrolase
ENSG00000105355	240.026	118.105	1,08657574421750	1.0998e-08	PLIN3	perilipin 3
ENSG00000117748	35.7477	18.2772	1,08649861949234	5.4417e-05	RPA2	replication protein A2, 32kDa
ENSG00000100029	126.041	65.352	1,08607615160156	1.24162e-08	PES1	pescadillo homolog 1, containing BRCT domain (zebrafish)
ENSG00000162194	70.5183	37.0059	1,08555572293001	2.17992e-05	C11orf48	chromosome 11 open reading frame 48
ENSG00000209480	171.239	81.47	1,08517104525781	0.00654999	SNORD83B	small nucleolar RNA, C/D box 83B
ENSG00000160688	59.2149	30.861	1,08498608031792	6.2888e-07	FLAD1	FAD1 flavin adenine dinucleotide synthetase homolog (S. cerevisiae)
ENSG00000091490	103.915	49.8046	1,08482630047965	1.53127e-08	SEL1L3	sel-1 suppressor of lin-12-like 3 (C. elegans)
ENSG00000100804	356.209	171.468	1,08406751840220	7.51669e-09	PSMB5	proteasome (prosome, macropain) subunit, beta type, 5
ENSG00000088876	12.52	4.29409	1,08402848601495	0.00188978	ZNF343	zinc finger protein 343
ENSG00000241530	4055.11	2090.95	1,08351855898826	6.70649e-08	AC006368.1
ENSG00000196449	27.3569	13.6991	1,08110228088147	8.28327e-06	YRDC	yrdC domain containing (E. coli)
ENSG00000176410	28.8878	14.2729	1,08031415076965	0.000580363	DNAJC30	DnaJ (Hsp40) homolog, subfamily C, member 30
ENSG00000117308	63.9562	31.0872	1,07995272117289	3.23485e-06	GALE	UDP-galactose-4-epimerase
ENSG00000149564	13.586	7.2022	1,07870098678460	0.00093726	ESAM	endothelial cell adhesion molecule
ENSG00000205155	94.9918	48.4875	1,07859456339820	1.82849e-06	PSENEN	presenilin enhancer 2 homolog (C. elegans)
ENSG00000137094	34.9805	19.4043	1,07854495616011	1.16212e-06	DNAJB5	DnaJ (Hsp40) homolog, subfamily B, member 5
ENSG00000172301	61.5953	31.0082	1,07597209092346	6.15652e-06	C17orf79	chromosome 17 open reading frame 79
ENSG00000175827	8.69121	4.32772	1,07552933863319	0.00167908	AP001266.1
ENSG00000120053	69.4534	33.2115	1,07540693540867	3.10254e-07	GOT1	glutamic-oxaloacetic transaminase 1, soluble (aspartate aminotransferase 1)
ENSG00000105220	166.766	83.4638	1,07516051883274	5.86402e-08	GPI	glucose-6-phosphate isomerase
ENSG00000040531	34.2796	17.1886	1,07452057779036	3.8511e-06	CTNS	cystinosis, nephropathic
ENSG00000096063	91.9494	42.7718	1,07380301300249	6.12809e-08	SRPK1	SRSF protein kinase 1
ENSG00000087074	153.634	75.3661	1,07370843121130	1.40297e-08	PPP1R15A	protein phosphatase 1, regulatory (inhibitor) subunit 15A
ENSG00000154122	117.901	54.7636	1,07350565756188	7.73474e-08	ANKH	ankylosis, progressive homolog (mouse)
ENSG00000187688	184.949	92.2756	1,07225553380428	8.01159e-09	TRPV2	transient receptor potential cation channel, subfamily V, member 2
ENSG00000115241	113.65	57.2449	1,07192362321338	1.08215e-08	PPM1G	protein phosphatase, Mg2+/Mn2+ dependent, 1G
ENSG00000180758	53.2622	30.0104	1,07185368065544	0.000131798	GPR157	G protein-coupled receptor 157
ENSG00000056972	13.5546	6.65098	1,07183286530585	0.000514254	TRAF3IP2	TRAF3 interacting protein 2
ENSG00000163879	20.8562	9.20648	1,07120438558788	0.00860733	DNALI1	dynein, axonemal, light intermediate chain 1
ENSG00000219565	15.1886	7.64991	1,07045454639234	0.00165856	ZNF259P1	zinc finger protein 259 pseudogene 1
ENSG00000227462	70.1345	35.8317	1,0701372248571	0.00103901	RP11-108B14.4
ENSG00000113716	68.0704	33.3261	1,06959416879212	1.439e-08	HMGXB3	HMG box domain containing 3
ENSG00000110619	104.99	55.1884	1,06957177948588	2.01648e-08	CARS	cysteinyl-tRNA synthetase
ENSG00000156521	8.11646	4.11308	1,06948586131464	0.000354052	TYSND1	trypsin domain containing 1
ENSG00000106077	17.2327	8.77446	1,06939550256393	0.00180872	ABHD11	abhydrolase domain containing 11
ENSG00000171680	21.0584	9.22416	1,06905673423081	5.62552e-07	PLEKHG5	pleckstrin homology domain containing, family G (with RhoGef domain) member 5
ENSG00000248817	10.8346	5.4662	1,06750240509213	0.00338643	RP11-562F9.1
ENSG00000166446	14.9183	7.2277	1,06715936932241	0.000131495	CDYL2	chromodomain protein, Y-like 2
ENSG00000139131	12.1823	6.21092	1,06606503515057	0.000686572	YARS2	tyrosyl-tRNA synthetase 2, mitochondrial
ENSG00000079156	7.18601	3.66096	1,06562479898506	0.00204941	OSBPL6	oxysterol binding protein-like 6
ENSG00000187024	48.8607	24.9815	1,06557658105494	0.000424874	PTRH1	peptidyl-tRNA hydrolase 1 homolog (S. cerevisiae)
ENSG00000110046	24.3306	11.3513	1,06501528833441	7.19247e-08	ATG2A	ATG2 autophagy related 2 homolog A (S. cerevisiae)
ENSG00000103254	22.0525	11.3838	1,05948438692838	0.0019926	FAM173A	family with sequence similarity 173, member A
ENSG00000189306	48.0426	23.163	1,0587115012752	1.2812e-06	RRP7A	ribosomal RNA processing 7 homolog A (S. cerevisiae)
ENSG00000011052	571.693	312.84	1,05850547862196	3.12493e-08	NME2	non-metastatic cells 2, protein (NM23B) expressed in
ENSG00000121766	68.1561	34.1605	1,05821154475083	4.00606e-06	ZCCHC17	zinc finger, CCHC domain containing 17
ENSG00000184207	20.6557	10.4057	1,05650332268120	1.91284e-06	PGP	phosphoglycolate phosphatase
ENSG00000184117	90.1731	33.0895	1,05611132009706	4.26286e-07	NIPSNAP1	nipsnap homolog 1 (C. elegans)
ENSG00000174744	102.382	48.5778	1,05416109432040	2.35685e-07	BRMS1	breast cancer metastasis suppressor 1
ENSG00000157216	51.4363	25.0855	1,05289345177609	3.5583e-05	SSBP3	single stranded DNA binding protein 3
ENSG00000242604	1121.55	590.207	1,05179248755120	1.48732e-08	AL512503.1
ENSG00000168621	87.364	47.9789	1,05000733456799	5.89305e-05	GDNF	glial cell derived neurotrophic factor
ENSG00000211459	416.69	225.009	1,04963689675580	6.28602e-08	J01415.24
ENSG00000102103	171.935	88.5293	1,04893430372367	1.869e-07	PQBP1	polyglutamine binding protein 1
ENSG00000173660	208.463	108.677	1,04872908994501	1.42509e-07	UQCRH	ubiquinol-cytochrome c reductase hinge protein
ENSG00000181817	90.712	46.616	1,04871647544253	1.74466e-06	LSM10	LSM10, U7 small nuclear RNA associated
ENSG00000155906	17.6306	8.49517	1,04853541402714	0.00117649	RMND1	required for meiotic nuclear division 1 homolog (S. cerevisiae)
ENSG00000220583	341.914	180.724	1,04822585313058	1.65864e-07	RPL35P2	ribosomal protein L35 pseudogene 2
ENSG00000167862	40.0653	20.9916	1,04686904430973	0.000156359	ICT1	immature colon carcinoma transcript 1
ENSG00000182718	1818.25	928.648	1,04649734787467	3.62249e-05	ANXA2	annexin A2
ENSG00000103415	60.9686	31.1371	1,04529544873422	3.0453e-07	HMOX2	heme oxygenase (decycling) 2
ENSG00000256950	48.6164	24.4811	1,04506297209583	0.00067081	RP11-87C12.2
ENSG00000235698	15.6266	7.98962	1,04497059561930	0.00366392	PA2G4P2	proliferation-associated 2G4 pseudogene 2
ENSG00000213673	15.6265	7.83595	1,04484348977569	0.00742142	RP11-436F9.2
ENSG00000197006	42.7407	22.4846	1,04422117001307	1.67178e-07	METTL9	methyltransferase like 9
ENSG00000004779	119.43	62.3102	1,04418497821539	1.1169e-06	NDUFAB1	NADH dehydrogenase (ubiquinone) 1, alpha/beta subcomplex, 1, 8kDa
ENSG00000104976	38.0768	19.4698	1,04401690252255	5.52871e-06	SNAPC2	small nuclear RNA activating complex, polypeptide 2, 45kDa
ENSG00000158715	4.34106	2.21844	1,04251026735558	0.00904394	SLC45A3	solute carrier family 45, member 3
ENSG00000252197	68945.9	36598.8	1,04146877200884	0.00794639	AC091047.1
ENSG00000119718	41.177	21.2334	1,04106995054473	4.29155e-06	EIF2B2	eukaryotic translation initiation factor 2B, subunit 2 beta, 39kDa
ENSG00000132603	16.6263	8.97856	1,04042415247943	0.000122304	NIP7	nuclear import 7 homolog (S. cerevisiae)
ENSG00000153132	14.7199	7.58198	1,03884412666640	0.00072174	CLGN	calmegin
ENSG00000164733	4947.9	2454.32	1,03698196006303	0.00141701	CTSB	cathepsin B
ENSG00000141378	38.6508	19.2942	1,03686687120338	0.000114198	PTRH2	peptidyl-tRNA hydrolase 2
ENSG00000136861	62.4994	26.5503	1,03432923993247	1.30476e-06	CDK5RAP2	CDK5 regulatory subunit associated protein 2
ENSG00000216740	151.288	78.2561	1,03328504064815	1.66065e-07	ANXA2P3	annexin A2 pseudogene 3
ENSG00000005022	422.671	222.105	1,03258082277157	3.30219e-08	SLC25A5	solute carrier family 25 (mitochondrial carrier; adenine nucleotide translocator), member 5
ENSG00000157617	70.2581	28.5972	1,03177180164530	8.42645e-08	C2CD2	C2 calcium-dependent domain containing 2
ENSG00000110427	7.04588	3.28421	1,03143766241639	6.32283e-05	C11orf41	chromosome 11 open reading frame 41
ENSG00000115128	78.4997	41.4707	1,0313867004702	1.26212e-05	AC008073.5	Pre-mRNA branch site protein p14
ENSG00000124688	35.9105	18.5785	1,03092812919169	4.52715e-05	MAD2L1BP	MAD2L1 binding protein
ENSG00000104356	12.9984	6.59147	1,03063283187802	0.00141169	POP1	processing of precursor 1, ribonuclease P/MRP subunit (S. cerevisiae)
ENSG00000011478	13.9311	7.37069	1,03022532248554	0.000288952	QPCTL	glutaminyl-peptide cyclotransferase-like
ENSG00000243013	1751.04	936.384	1,02945104904970	8.21152e-08	AL592307.1
ENSG00000198324	16.6783	8.25845	1,02920658837167	6.1152e-05	FAM109A	family with sequence similarity 109, member A
ENSG00000184216	386.909	202.018	1,02907151705023	5.06253e-08	IRAK1	interleukin-1 receptor-associated kinase 1
ENSG00000136930	399.827	202.713	1,02788224387664	5.10195e-08	PSMB7	proteasome (prosome, macropain) subunit, beta type, 7
ENSG00000142546	136.046	71.1521	1,02768966787357	1.5939e-07	NOSIP	nitric oxide synthase interacting protein
ENSG00000164081	94.8404	54.0651	1,02692794349552	4.77839e-06	TEX264	testis expressed 264
ENSG00000130204	57.7044	29.7905	1,02391542463227	5.84427e-07	TOMM40	translocase of outer mitochondrial membrane 40 homolog (yeast)
ENSG00000163597	56.1239	28.9109	1,02246616922935	3.17699e-07	AC090699.1	small nucleolar RNA, C/D box 1C (SNORD1C), small nucleolar RNA
ENSG00000105364	80.417	41.9946	1,02121728871560	3.34753e-07	MRPL4	mitochondrial ribosomal protein L4
ENSG00000244457	317.879	169.107	1,02116263968519	9.57605e-08	ENO1P1	enolase 1, (alpha) pseudogene 1
ENSG00000125967	51.9467	25.1764	1,02096284277707	4.84961e-05	NECAB3	N-terminal EF-hand calcium binding protein 3
ENSG00000033170	17.1512	8.72748	1,01978160368048	2.13968e-05	FUT8	fucosyltransferase 8 (alpha (1,6) fucosyltransferase)
ENSG00000053371	81.6592	43.5519	1,01954030150604	3.68693e-06	AKR7A2	aldo-keto reductase family 7, member A2 (aflatoxin aldehyde reductase)
ENSG00000225267	80.151	42.8768	1,01949335718234	7.04109e-05	RPL8P2	ribosomal protein L8 pseudogene 2
ENSG00000165060	26.6087	13.4893	1,01914952770587	0.00814331	FXN	frataxin
ENSG00000166925	71.013	37.5321	1,01718484109066	2.57055e-07	TSC22D4	TSC22 domain family, member 4
ENSG00000100462	95.1334	49.6024	1,01699186434255	2.57018e-07	PRMT5	protein arginine methyltransferase 5
ENSG00000231991	1500.09	786.737	1,01614760412845	2.65213e-05	ANXA2P2	annexin A2 pseudogene 2
ENSG00000181039	5.42887	2.80196	1,01579747669347	0.00438531	ANKRD34A	ankyrin repeat domain 34A
ENSG00000185404	11.1954	6.91336	1,01340985432261	0.00173996	SP140L	SP140 nuclear body protein-like
ENSG00000172936	74.1486	39.0829	1,01326357185875	1.92645e-07	MYD88	myeloid differentiation primary response gene (88)
ENSG00000105671	45.4588	23.7667	1,01218167518453	1.98665e-06	DDX49	DEAD (Asp-Glu-Ala-Asp) box polypeptide 49
ENSG00000237991	169.384	91.5551	1,01174054086052	9.04038e-06	RPL35P1	ribosomal protein L35 pseudogene 1
ENSG00000255262	206.92	109.895	1,01078847515869	2.23251e-06	RP11-567M21.2
ENSG00000228236	181.028	96.4658	1,01056093450025	4.32873e-05	AC073271.1
ENSG00000241127	26.1426	14.0865	1,01029815671571	0.00972252	C7orf36	chromosome 7 open reading frame 36
ENSG00000237794	43.5711	22.3236	1,00868960219645	0.000815976	TOP1P1	topoisomerase (DNA) I pseudogene 1
ENSG00000215414	96.3636	51.9492	1,00864451984012	6.64971e-06	PSMA6P1	proteasome (prosome, macropain) subunit, alpha type, 6 pseudogene 1
ENSG00000228253	4124.57	2321.64	1,00775107906153	9.00086e-06	J01415.25	ATP synthase protein 8
ENSG00000137876	26.9046	14.3971	1,00720945084695	3.78303e-05	RSL24D1	ribosomal L24 domain containing 1
ENSG00000182224	9.62295	4.82956	1,00686249133929	0.00252004	CYB5D1	cytochrome b5 domain containing 1
ENSG00000213820	40.2726	21.6689	1,00669597486127	0.000672196	RPL13P2	ribosomal protein L13 pseudogene 2
ENSG00000224993	60.1656	32.7505	1,00657093554775	0.00102172	CTD-2210P15.1
ENSG00000130713	29.725	14.8008	1,00634057548569	0.000281308	EXOSC2	exosome component 2
ENSG00000088682	38.6568	20.3657	1,00604025308435	1.03975e-05	COQ9	coenzyme Q9 homolog (S. cerevisiae)
ENSG00000239776	187.715	103.455	1,00580981981665	9.51478e-07	AC079949.1
ENSG00000136261	44.2736	24.6936	1,00567607930744	3.22065e-05	BZW2	basic leucine zipper and W2 domains 2
ENSG00000130589	39.6186	20.3519	1,00543684018286	6.96993e-08	RP4-697K14.7	Peroxisomal proliferator-activated receptor A-interacting complex 285 kDa protein
ENSG00000114999	34.439	18.496	1,00514500329761	2.58474e-07	TTL	tubulin tyrosine ligase
ENSG00000163682	205.62	116.629	1,00440682077347	1.28433e-06	RPL9	ribosomal protein L9
ENSG00000240656	150.679	83.0077	1,00402500981362	4.26019e-05	AC068594.1
ENSG00000154328	26.0694	13.0257	1,00370626080062	0.000315134	NEIL2	nei endonuclease VIII-like 2 (E. coli)
ENSG00000115946	25.046	12.1992	1,00273866848031	0.000652017	PNO1	partner of NOB1 homolog (S. cerevisiae)
ENSG00000198522	42.3229	21.5184	1,00096122455856	7.49436e-05	GPN1	GPN-loop GTPase 1
ENSG00000120265	90.1561	53.4856	1,00078113373653	2.03061e-06	PCMT1	protein-L-isoaspartate (D-aspartate) O-methyltransferase
ENSG00000170473	70.7787	30.4634	1,00046536776410	0.000551611	WIBG	within bgcn homolog (Drosophila)
ENSG00000117118	179.212	98.1024	0,999256919741885	1.0078e-06	SDHB	succinate dehydrogenase complex, subunit B, iron sulfur (Ip)
ENSG00000074800	1972.39	1079.72	0,998523386228211	0.00102639	ENO1	enolase 1, (alpha)
ENSG00000099804	115.721	61.2751	0,998091783142252	2.3533e-07	CDC34	cell division cycle 34 homolog (S. cerevisiae)
ENSG00000144118	94.8881	52.1327	0,996521649797354	1.04832e-06	RALB	v-ral simian leukemia viral oncogene homolog B (ras related; GTP binding protein)
ENSG00000197603	5.43477	14.8224	-1,00057675634532	0.022491	C5orf42	chromosome 5 open reading frame 42
ENSG00000075420	66.7384	115.788	-1,00076813930050	2.20792e-05	FNDC3B	fibronectin type III domain containing 3B
ENSG00000221366	135.522	281.765	-1,00163735044104	0.00667659	MIR1306	microRNA 1306
ENSG00000168970	3.01444	6.87572	-1,00300841440750	0.0439148	JMJD7-PLA2G4B	JMJD7-PLA2G4B readthrough
ENSG00000151612	8.77775	16.2795	-1,00307217577046	0.00393504	ZNF827	zinc finger protein 827
ENSG00000135862	222.886	382.656	-1,0041096296643	0.000204519	LAMC1	laminin, gamma 1 (formerly LAMB2)
ENSG00000124177	5.61204	7.58485	-1,00444941219513	0.00156492	CHD6	chromodomain helicase DNA binding protein 6
ENSG00000055211	13.0548	27.2758	-1,00472815951398	0.00178045	C6orf72	chromosome 6 open reading frame 72
ENSG00000135679	66.4382	146.111	-1,00503999203206	2.12415e-05	MDM2	Mdm2 p53 binding protein homolog (mouse)
ENSG00000085276	4.29356	7.76375	-1,00516886544926	0.0460328	MECOM	MDS1 and EVI1 complex locus
ENSG00000173918	17.4069	36.882	-1,00609996230623	8.04117e-05	C1QTNF1	C1q and tumor necrosis factor related protein 1
ENSG00000169213	54.942	81.6641	-1,00726516158903	4.07698e-05	RAB3B	RAB3B, member RAS oncogene family
ENSG00000207783	151.803	308.204	-1,00895166160077	0.0167071	MIR564	microRNA 564
ENSG00000109099	17.9029	36.2629	-1,01011710708848	0.00105399	PMP22	peripheral myelin protein 22
ENSG00000137193	6.8862	12.5812	-1,01084123129215	0.0263235	PIM1	pim-1 oncogene
ENSG00000183873	2.50058	4.24299	-1,01104762370018	0.0258577	SCN5A	sodium channel, voltage-gated, type V, alpha subunit
ENSG00000170498	18.3736	39.3455	-1,01255944849369	0.00734604	KISS1	KiSS-1 metastasis-suppressor
ENSG00000140044	5.72186	12.3285	-1,01268167061453	0.000858717	JDP2	Jun dimerization protein 2
ENSG00000114251	126.972	253.63	-1,01268758648021	2.27757e-05	WNT5A	wingless-type MMTV integration site family, member 5A
ENSG00000117620	4.73388	10.1712	-1,01405375702628	0.0277877	SLC35A3	solute carrier family 35 (UDP-N-acetylglucosamine (UDP-GlcNAc) transporter), member A3
ENSG00000246763	5.81892	13.5771	-1,01456790922512	0.029277	CTC-463N11.3
ENSG00000014123	2.54858	5.12065	-1,01712135991764	0.0187614	KIAA0776	KIAA0776
ENSG00000151553	10.4312	18.0073	-1,01869475487912	0.00127629	FAM160B1	family with sequence similarity 160, member B1
ENSG00000139350	1.96659	4.09642	-1,01953864002418	0.0326112	NEDD1	neural precursor cell expressed, developmentally down-regulated 1
ENSG00000131470	7.23147	14.6651	-1,02030454906121	0.0156358	PSMC3IP	PSMC3 interacting protein
ENSG00000183354	3.40509	5.74973	-1,02155784867903	0.0118868	KIAA2026	KIAA2026
ENSG00000183723	1.38359	2.79119	-1,02198871516065	0.013581	CMTM4	CKLF-like MARVEL transmembrane domain containing 4
ENSG00000123737	10.595	24.569	-1,02199604791744	0.00600602	EXOSC9	exosome component 9
ENSG00000156052	11.9547	22.1148	-1,02220613527580	0.000529872	GNAQ	guanine nucleotide binding protein (G protein), q polypeptide
ENSG00000164040	17.4269	84.8002	-1,02304402393695	2.50735e-05	PGRMC2	progesterone receptor membrane component 2
ENSG00000035862	316.149	605.574	-1,02460470029232	0.000700839	TIMP2	TIMP metallopeptidase inhibitor 2
ENSG00000072415	3.7857	7.96846	-1,02488556764017	0.00126582	MPP5	membrane protein, palmitoylated 5 (MAGUK p55 subfamily member 5)
ENSG00000154736	1.52449	3.11199	-1,02542184421714	0.00617322	ADAMTS5	ADAM metallopeptidase with thrombospondin type 1 motif, 5
ENSG00000122870	6.05532	12.3278	-1,02595379329222	0.000228477	BICC1	bicaudal C homolog 1 (Drosophila)
ENSG00000140743	9.80762	20.6116	-1,02624935482721	0.000366139	CDR2	cerebellar degeneration-related protein 2, 62kDa
ENSG00000065308	24.2383	50.2861	-1,02631175176706	1.62433e-05	TRAM2	translocation associated membrane protein 2
ENSG00000156802	2.57097	4.91977	-1,02671764542494	0.0199625	ATAD2	ATPase family, AAA domain containing 2
ENSG00000120256	62.4302	106.681	-1,02734723780563	4.32679e-05	LRP11	low density lipoprotein receptor-related protein 11
ENSG00000144283	10.9633	28.643	-1,02838758704474	0.0018696	PKP4	plakophilin 4
ENSG00000197702	177.706	355.346	-1,02940358943963	1.17672e-05	PARVA	parvin, alpha
ENSG00000187091	17.048	34.7047	-1,02950695044131	0.00182752	PLCD1	phospholipase C, delta 1
ENSG00000240303	11.5335	22.4934	-1,03118520260777	0.000720922	ACAD11	acyl-CoA dehydrogenase family, member 11
ENSG00000163703	31.2675	67.0361	-1,03119475763925	0.000141012	CRELD1	cysteine-rich with EGF-like domains 1
ENSG00000236360	14.8362	31.1904	-1,03189531772390	0.0455519	RP11-334A14.2
ENSG00000127946	14.1127	24.4152	-1,03192764009894	4.62951e-05	HIP1	huntingtin interacting protein 1
ENSG00000014914	5.92918	13.7298	-1,03196382416921	0.00942266	MTMR11	myotubularin related protein 11
ENSG00000197852	4.93114	7.92051	-1,03317719854079	0.0147454	C1orf183	chromosome 1 open reading frame 183
ENSG00000145545	15.1461	29.7043	-1,03489158998107	0.00397266	SRD5A1	steroid-5-alpha-reductase, alpha polypeptide 1 (3-oxo-5 alpha-steroid delta 4-dehydrogenase alpha 1)
ENSG00000183496	2.30878	4.89053	-1,03539537462599	0.0250382	MEX3B	mex-3 homolog B (C. elegans)
ENSG00000103174	3.71058	7.77327	-1,03558067682652	0.0238747	NAGPA	N-acetylglucosamine-1-phosphodiester alpha-N-acetylglucosaminidase
ENSG00000132793	4.31268	8.90415	-1,03622134132694	0.0172435	LPIN3	lipin 3
ENSG00000185189	16.7046	35.436	-1,03876603461330	0.000101084	NRBP2	nuclear receptor binding protein 2
ENSG00000186918	16.1624	35.6672	-1,03901585782465	0.00028737	ZNF395	zinc finger protein 395
ENSG00000198586	4.6406	9.51918	-1,03970448768074	0.00294393	TLK1	tousled-like kinase 1
ENSG00000134138	2.94809	6.1966	-1,03994322267763	0.0143849	MEIS2	Meis homeobox 2
ENSG00000138744	20.0709	44.4776	-1,03996008471776	0.00297013	NAAA	N-acylethanolamine acid amidase
ENSG00000112697	133.444	277.428	-1,04059440086255	1.65106e-05	TMEM30A	transmembrane protein 30A
ENSG00000162430	56.6153	122.49	-1,04199470305608	1.57323e-05	SEPN1	selenoprotein N, 1
ENSG00000198162	19.4858	37.7311	-1,04297843919413	6.36467e-05	MAN1A2	mannosidase, alpha, class 1A, member 2
ENSG00000074657	6.68743	14.0533	-1,04341969751972	5.96418e-05	ZNF532	zinc finger protein 532
ENSG00000032219	4.33269	8.99029	-1,04462798447387	0.0382163	ARID4A	AT rich interactive domain 4A (RBP1-like)
ENSG00000185761	8.4265	17.7793	-1,04467212527356	0.00194575	ADAMTSL5	ADAMTS-like 5
ENSG00000187741	4.30139	5.66377	-1,04581497795612	0.0280278	FANCA	Fanconi anemia, complementation group A
ENSG00000096092	6.54039	14.1105	-1,04719683707308	0.0370072	TMEM14A	transmembrane protein 14A
ENSG00000111727	4.15264	8.18955	-1,04778121621524	0.00566295	HCFC2	host cell factor C2
ENSG00000198795	4.47485	9.47796	-1,04952758141157	0.00117523	ZNF521	zinc finger protein 521
ENSG00000144724	9.75031	18.2023	-1,04963040962518	5.38126e-05	PTPRG	protein tyrosine phosphatase, receptor type, G
ENSG00000168056	91.2353	198.776	-1,04968340954224	2.20776e-05	LTBP3	latent transforming growth factor beta binding protein 3
ENSG00000242045	34.4651	72.1109	-1,05007800758954	0.0128491	RP1-90K10.3
ENSG00000011295	2.91046	5.96281	-1,05257838696533	0.0370352	TTC19	tetratricopeptide repeat domain 19
ENSG00000102181	18.7475	38.9758	-1,05263752048332	2.93194e-05	CD99L2	CD99 molecule-like 2
ENSG00000104763	22.1053	53.7569	-1,05271893928152	0.000278748	ASAH1	N-acylsphingosine amidohydrolase (acid ceramidase) 1
ENSG00000167632	10.1236	19.0138	-1,05300741566541	0.00354991	TRAPPC9	trafficking protein particle complex 9
ENSG00000120896	250.757	549.118	-1,05382871818764	9.82142e-06	SORBS3	sorbin and SH3 domain containing 3
ENSG00000145349	6.64354	33.111	-1,05501049770058	4.87507e-05	CAMK2D	calcium/calmodulin-dependent protein kinase II delta
ENSG00000156650	4.18932	8.96834	-1,05671099049347	0.000262218	MYST4	MYST histone acetyltransferase (monocytic leukemia) 4
ENSG00000196776	65.4453	121.767	-1,05704034965185	5.2065e-06	CD47	CD47 molecule
ENSG00000196083	2.17572	5.5418	-1,05808021935904	0.033565	IL1RAP	interleukin 1 receptor accessory protein
ENSG00000154305	18.5394	30.3128	-1,06090635807446	0.000376543	MIA3	melanoma inhibitory activity family, member 3
ENSG00000167549	2.57476	6.59267	-1,06093829022064	0.0194102	CORO6	coronin 6
ENSG00000117228	14.8892	33.7302	-1,06153381587536	0.000133384	GBP1	guanylate binding protein 1, interferon-inducible, 67kDa
ENSG00000136378	5.24626	10.591	-1,06283299987089	0.000503422	ADAMTS7	ADAM metallopeptidase with thrombospondin type 1 motif, 7
ENSG00000132424	10.0431	18.4472	-1,06417239212650	0.00121196	SFRS18	splicing factor, arginine/serine-rich 18
ENSG00000168386	49.6138	97.1295	-1,06417484080577	5.4095e-06	FILIP1L	filamin A interacting protein 1-like
ENSG00000170242	26.48	54.1085	-1,06601782111116	2.47494e-05	USP47	ubiquitin specific peptidase 47
ENSG00000132274	33.0182	68.4773	-1,06679996516085	4.48002e-05	TRIM22	tripartite motif containing 22
ENSG00000108395	5.10542	10.9394	-1,0669972410486	0.000491884	TRIM37	tripartite motif containing 37
ENSG00000212747	37.9749	80.3515	-1,06784764877639	8.1182e-05	FAM127C	family with sequence similarity 127, member C
ENSG00000071537	50.7188	103.243	-1,06795192015629	1.0244e-05	SEL1L	sel-1 suppressor of lin-12-like (C. elegans)
ENSG00000133392	2.20019	4.61406	-1,06823378763982	0.00310564	MYH11	myosin, heavy chain 11, smooth muscle
ENSG00000130584	2.5274	4.52056	-1,06937638066602	0.0198655	ZBTB46	zinc finger and BTB domain containing 46
ENSG00000120913	86.8146	176.633	-1,07004144114751	9.96787e-06	PDLIM2	PDZ and LIM domain 2 (mystique)
ENSG00000178467	22.7012	48.1179	-1,07027104794889	0.000238858	P4HTM	prolyl 4-hydroxylase, transmembrane (endoplasmic reticulum)
ENSG00000065357	20.4891	46.9422	-1,0702915239668	2.72418e-05	DGKA	diacylglycerol kinase, alpha 80kDa
ENSG00000121440	8.32892	17.5358	-1,07090034709339	0.00638559	PDZRN3	PDZ domain containing ring finger 3
ENSG00000150760	36.243	22.7233	-1,07108754871465	1.49193e-05	DOCK1	dedicator of cytokinesis 1
ENSG00000143815	6.16754	13.9629	-1,07273345278977	0.0211672	LBR	lamin B receptor
ENSG00000168216	4.80471	10.9995	-1,07334324494293	0.00714294	LMBRD1	LMBR1 domain containing 1
ENSG00000237931	32.8214	71.0669	-1,07417349390721	0.000324834	RP11-469E19.1
ENSG00000092964	38.5856	89.1388	-1,07473320543696	4.40333e-06	DPYSL2	dihydropyrimidinase-like 2
ENSG00000164983	1.86112	4.04995	-1,07502685533380	0.033003	TMEM65	transmembrane protein 65
ENSG00000158122	5.03308	12.0252	-1,07546135885656	0.0135196	C9orf21	chromosome 9 open reading frame 21
ENSG00000144366	12.8857	29.7093	-1,07585928070707	0.00451073	GULP1	GULP, engulfment adaptor PTB domain containing 1
ENSG00000234616	2.25119	4.54671	-1,07598079488641	0.0201805	JRK	jerky homolog (mouse)
ENSG00000168899	68.0754	155.845	-1,07604002949732	2.61635e-05	VAMP5	vesicle-associated membrane protein 5 (myobrevin)
ENSG00000128923	2.64996	5.62147	-1,07612824004729	0.00430043	FAM63B	family with sequence similarity 63, member B
ENSG00000169925	10.9857	21.2008	-1,0766209882272	0.00291597	BRD3	bromodomain containing 3
ENSG00000136379	4.83775	10.5591	-1,07723305573851	0.00458815	FAM108C1	family with sequence similarity 108, member C1
ENSG00000204388	31.9433	70.5074	-1,07737048085957	1.37151e-05	HSPA1B	heat shock 70kDa protein 1B
ENSG00000131652	6.1169	13.8548	-1,07761565071827	0.00973117	THOC6	THO complex 6 homolog (Drosophila)
ENSG00000076513	17.5409	38.4203	-1,07888023437401	7.28106e-06	ANKRD13A	ankyrin repeat domain 13A
ENSG00000114853	9.85342	20.6321	-1,07922137441563	5.63761e-05	ZBTB47	zinc finger and BTB domain containing 47
ENSG00000144935	5.45521	10.7916	-1,08032287016614	0.0136234	TRPC1	transient receptor potential cation channel, subfamily C, member 1
ENSG00000087253	2.06332	4.45225	-1,08053020031736	0.00793676	LPCAT2	lysophosphatidylcholine acyltransferase 2
ENSG00000166938	7.09628	8.99315	-1,08439065758183	0.0262383	DIS3L	DIS3 mitotic control homolog (S. cerevisiae)-like
ENSG00000136928	8.22831	18.1602	-1,08476057675977	3.18259e-05	GABBR2	gamma-aminobutyric acid (GABA) B receptor, 2
ENSG00000166801	6.82862	14.8552	-1,08646528807658	0.00354177	FAM111A	family with sequence similarity 111, member A
ENSG00000146085	2.68073	5.90281	-1,09101159268493	0.00694356	MUT	methylmalonyl CoA mutase
ENSG00000058272	7.06615	15.3238	-1,09235648127151	2.92932e-05	PPP1R12A	protein phosphatase 1, regulatory (inhibitor) subunit 12A
ENSG00000139926	32.8347	72.2221	-1,09291237111819	2.78954e-06	FRMD6	FERM domain containing 6
ENSG00000100697	11.8062	17.2376	-1,09335086942381	0.000413657	DICER1	dicer 1, ribonuclease type III
ENSG00000067900	6.53675	14.0707	-1,09365612874837	2.20575e-05	ROCK1	Rho-associated, coiled-coil containing protein kinase 1
ENSG00000169499	14.9615	44.0579	-1,09366883774327	0.000275893	PLEKHA2	pleckstrin homology domain containing, family A (phosphoinositide binding specific) member 2
ENSG00000100345	849.002	1889.07	-1,09386045669595	0.0148528	MYH9	myosin, heavy chain 9, non-muscle
ENSG00000169991	6.10613	12.9662	-1,09386346933116	0.00112702	IFFO2	intermediate filament family orphan 2
ENSG00000123384	38.9817	83.5407	-1,09399036766495	0.000348435	LRP1	low density lipoprotein receptor-related protein 1
ENSG00000206538	26.572	49.826	-1,09706368931913	1.87831e-05	VGLL3	vestigial like 3 (Drosophila)
ENSG00000143641	51.9187	110.973	-1,09755923336362	3.60611e-06	GALNT2	UDP-N-acetyl-alpha-D-galactosamine:polypeptide N-acetylgalactosaminyltransferase 2 (GalNAc-T2)
ENSG00000115687	3.27946	5.48692	-1,09759711533742	0.0336715	PASK	PAS domain containing serine/threonine kinase
ENSG00000177119	10.9868	23.863	-1,10071377470538	7.87383e-06	ANO6	anoctamin 6
ENSG00000184674	49.293	119.948	-1,10078042500964	0.00013771	GSTT1	glutathione S-transferase theta 1
ENSG00000196950	11.0783	19.3449	-1,10339014781202	0.000469105	SLC39A10	solute carrier family 39 (zinc transporter), member 10
ENSG00000196639	6.94085	15.4048	-1,10345443162979	0.000267223	HRH1	histamine receptor H1
ENSG00000131374	6.24906	18.4883	-1,10388272959487	0.000306549	TBC1D5	TBC1 domain family, member 5
ENSG00000102908	3.03191	6.54502	-1,10525944966153	2.72211e-05	NFAT5	nuclear factor of activated T-cells 5, tonicity-responsive
ENSG00000124942	50.6416	92.6523	-1,10649315597843	7.03397e-05	AHNAK	AHNAK nucleoprotein
ENSG00000225733	10.5253	23.6749	-1,10706365323236	8.94839e-05	AC090937.2
ENSG00000227201	5.65423	12.8071	-1,10759327417225	0.0408273	CNN2P1	calponin 2 pseudogene 1
ENSG00000104412	15.352	31.7784	-1,10777004889930	0.00569855	TTC35	tetratricopeptide repeat domain 35
ENSG00000255103	2.32617	4.99878	-1,10801829157426	0.00270861	KIAA0754	KIAA0754
ENSG00000247909	1.84969	4.06453	-1,11106142412794	0.0337344	AL669918.1
ENSG00000186318	52.4651	102.423	-1,11294405389271	8.50244e-06	BACE1	beta-site APP-cleaving enzyme 1
ENSG00000058668	43.5845	68.6038	-1,1130530868657	4.83412e-06	ATP2B4	ATPase, Ca++ transporting, plasma membrane 4
ENSG00000179954	10.697	23.5068	-1,11357697375137	1.65036e-05	SSC5D	scavenger receptor cysteine rich domain containing (5 domains)
ENSG00000152894	39.9395	92.0813	-1,11373809580540	2.74186e-06	PTPRK	protein tyrosine phosphatase, receptor type, K
ENSG00000164828	54.0988	114.945	-1,11402766346362	5.18631e-06	SUN1	Sad1 and UNC84 domain containing 1
ENSG00000188994	8.10639	15.1088	-1,11539518662939	0.00539252	ZNF292	zinc finger protein 292
ENSG00000153721	2.36242	5.46123	-1,11605649785321	0.0349247	CNKSR3	CNKSR family member 3
ENSG00000117114	1.23508	2.82459	-1,11631659393736	0.0155356	LPHN2	latrophilin 2
ENSG00000037749	9.31626	17.6428	-1,11649157346438	0.00067371	MFAP3	microfibrillar-associated protein 3
ENSG00000163545	4.30178	9.67808	-1,11815232358983	0.00105616	NUAK2	NUAK family, SNF1-like kinase, 2
ENSG00000139998	1.58828	3.48252	-1,11830268873848	0.0405749	RAB15	RAB15, member RAS onocogene family
ENSG00000162496	16.5118	36.7566	-1,11956756091173	0.000311697	DHRS3	dehydrogenase/reductase (SDR family) member 3
ENSG00000137834	4.7822	11.077	-1,12022831112048	0.0110536	SMAD6	SMAD family member 6
ENSG00000165392	2.32211	4.80636	-1,12074340715967	0.00868901	WRN	Werner syndrome, RecQ helicase-like
ENSG00000168016	6.33984	11.3809	-1,12153160807192	0.0012964	TRANK1	tetratricopeptide repeat and ankyrin repeat containing 1
ENSG00000108055	4.4057	9.66719	-1,12207011149915	0.000831231	SMC3	structural maintenance of chromosomes 3
ENSG00000163629	9.43024	21.0041	-1,12229972079730	2.73741e-05	PTPN13	protein tyrosine phosphatase, non-receptor type 13 (APO-1/CD95 (Fas)-associated phosphatase)
ENSG00000213366	25.6177	60.383	-1,12291425348515	9.7648e-05	GSTM2	glutathione S-transferase mu 2 (muscle)
ENSG00000103335	193.523	402.773	-1,12311309404600	4.69983e-05	FAM38A	family with sequence similarity 38, member A
ENSG00000115109	9.41874	16.5202	-1,12352898400432	0.000101923	EPB41L5	erythrocyte membrane protein band 4.1 like 5
ENSG00000114127	11.9501	25.1535	-1,12527898372729	0.000617693	XRN1	5'-3' exoribonuclease 1
ENSG00000173068	4.00876	6.40588	-1,12651147953059	0.0118443	BNC2	basonuclin 2
ENSG00000181458	12.6795	28.9088	-1,12708390489478	0.00229078	TMEM45A	transmembrane protein 45A
ENSG00000138593	7.40742	15.7514	-1,12772675655110	2.12045e-05	SECISBP2L	SECIS binding protein 2-like
ENSG00000138031	25.6928	58.8312	-1,12814741095627	4.89551e-05	ADCY3	adenylate cyclase 3
ENSG00000151718	11.7889	28.4412	-1,12843812828982	2.47494e-05	WWC2	WW and C2 domain containing 2
ENSG00000115159	11.388	25.0622	-1,12927280694152	0.000209741	GPD2	glycerol-3-phosphate dehydrogenase 2 (mitochondrial)
ENSG00000204946	2.32358	5.07811	-1,13016440602421	0.0295726	ZNF783	zinc finger family member 783
ENSG00000104324	19.0059	36.6587	-1,13035168972546	0.000545935	AC010859.1	Plasma glutamate carboxypeptidase
ENSG00000205978	6.29596	16.4058	-1,13090473013952	3.46892e-05	NYNRIN	NYN domain and retroviral integrase containing
ENSG00000198892	23.5791	55.1187	-1,13115207386980	0.000128516	SHISA4	shisa homolog 4 (Xenopus laevis)
ENSG00000136156	58.5696	136.258	-1,13167789695446	1.69055e-06	ITM2B	integral membrane protein 2B
ENSG00000160967	13.1348	31.8486	-1,13490873219261	9.39176e-06	CUX1	cut-like homeobox 1
ENSG00000166398	5.13854	11.4634	-1,13539931455525	0.000131495	KIAA0355	KIAA0355
ENSG00000090975	6.52268	13.1263	-1,13627052288378	0.00036739	PITPNM2	phosphatidylinositol transfer protein, membrane-associated 2
ENSG00000104154	0.968931	2.14571	-1,13661856567498	0.0198655	SLC30A4	solute carrier family 30 (zinc transporter), member 4
ENSG00000204389	30.3865	67.7178	-1,13841480615665	4.527e-06	HSPA1A	heat shock 70kDa protein 1A
ENSG00000140682	66.0149	152.605	-1,14008053271864	2.0944e-06	TGFB1I1	transforming growth factor beta 1 induced transcript 1
ENSG00000131018	5.34053	17.9224	-1,14051209555566	8.00657e-06	SYNE1	spectrin repeat containing, nuclear envelope 1
ENSG00000038427	61.1053	135.576	-1,14117043594213	2.64362e-06	VCAN	versican
ENSG00000147251	1.85015	4.40763	-1,14215142098205	0.00320907	DOCK11	dedicator of cytokinesis 11
ENSG00000071539	9.05308	21.9276	-1,14265736113729	0.0142482	TRIP13	thyroid hormone receptor interactor 13
ENSG00000149633	3.74178	9.46148	-1,14279621206951	0.0043156	KIAA1755	KIAA1755
ENSG00000101596	4.30803	9.42026	-1,14293824699181	3.219e-05	SMCHD1	structural maintenance of chromosomes flexible hinge domain containing 1
ENSG00000136824	2.03646	4.34402	-1,14342851366213	0.00937519	SMC2	structural maintenance of chromosomes 2
ENSG00000104870	23.1251	53.9103	-1,14354535360900	1.01713e-05	FCGRT	Fc fragment of IgG, receptor, transporter, alpha
ENSG00000182179	16.2181	39.7539	-1,14363537464053	0.000378383	UBA7	ubiquitin-like modifier activating enzyme 7
ENSG00000000971	7.30629	16.5765	-1,14378034317383	0.000348163	CFH	complement factor H
ENSG00000196154	175.366	429.293	-1,14754206883299	5.85238e-07	S100A4	S100 calcium binding protein A4
ENSG00000130508	555.59	1214.18	-1,14821933137532	0.00188973	PXDN	peroxidasin homolog (Drosophila)
ENSG00000145147	2.78956	6.40391	-1,14876362487576	0.0078682	SLIT2	slit homolog 2 (Drosophila)
ENSG00000163346	30.3947	70.1989	-1,14905011973424	3.00394e-06	PBXIP1	pre-B-cell leukemia homeobox interacting protein 1
ENSG00000136451	5.43459	12.4081	-1,15045610521994	7.66355e-05	VEZF1	vascular endothelial zinc finger 1
ENSG00000104177	1.23971	2.80177	-1,15075436255924	0.0151257	MYEF2	myelin expression factor 2
ENSG00000167100	12.2705	20.479	-1,15094272021833	0.000665373	SAMD14	sterile alpha motif domain containing 14
ENSG00000007237	3.65218	7.32227	-1,15099962465294	0.000348631	GAS7	growth arrest-specific 7
ENSG00000137941	3.26746	9.29774	-1,15128288606872	0.00944125	TTLL7	tubulin tyrosine ligase-like family, member 7
ENSG00000166479	11.3185	24.0799	-1,15335585420465	1.54687e-05	TMX3	thioredoxin-related transmembrane protein 3
ENSG00000136848	20.9503	45.5097	-1,15342959687989	3.89637e-06	DAB2IP	DAB2 interacting protein
ENSG00000111897	41.0022	94.6921	-1,15387152612924	6.06623e-07	SERINC1	serine incorporator 1
ENSG00000170456	2.62934	4.75565	-1,15401496122629	0.0130876	DENND5B	DENN/MADD domain containing 5B
ENSG00000064666	127.518	303.454	-1,15539539821181	3.07151e-06	CNN2	calponin 2
ENSG00000144711	6.02017	13.0037	-1,15560082616323	4.32973e-05	IQSEC1	IQ motif and Sec7 domain 1
ENSG00000067445	11.7393	26.4854	-1,15584455471194	0.000155671	TRO	trophinin
ENSG00000162616	9.91784	22.6225	-1,15637605380545	0.00272977	DNAJB4	DnaJ (Hsp40) homolog, subfamily B, member 4
ENSG00000010803	6.50568	15.6426	-1,15657271220129	0.000539571	SCMH1	sex comb on midleg homolog 1 (Drosophila)
ENSG00000112655	106.006	217.023	-1,15826662168161	1.42937e-06	PTK7	PTK7 protein tyrosine kinase 7
ENSG00000139178	19.4212	33.4136	-1,15842957129432	0.000515121	C1RL	complement component 1, r subcomponent-like
ENSG00000146373	12.4253	21.4784	-1,15904325687048	0.00261301	RNF217	ring finger protein 217
ENSG00000132549	4.7811	14.4441	-1,15993575755285	0.000128459	VPS13B	vacuolar protein sorting 13 homolog B (yeast)
ENSG00000163378	9.69603	22.3817	-1,16275762388059	0.000199143	C3orf64	chromosome 3 open reading frame 64
ENSG00000162542	11.2239	25.2174	-1,16390703832817	0.000441464	TMCO4	transmembrane and coiled-coil domains 4
ENSG00000083750	8.33277	17.4893	-1,16515901611914	0.0151626	RRAGB	Ras-related GTP binding B
ENSG00000119986	16.8949	39.7293	-1,16560494646521	5.4417e-05	AVPI1	arginine vasopressin-induced 1
ENSG00000083535	9.90401	30.3146	-1,16640402866800	0.00499574	PIBF1	progesterone immunomodulatory binding factor 1
ENSG00000091622	2.07872	4.69372	-1,16697779514992	0.00100567	PITPNM3	PITPNM family member 3
ENSG00000197563	1.53474	3.55992	-1,16791458151961	0.010152	PIGN	phosphatidylinositol glycan anchor biosynthesis, class N
ENSG00000178033	1.28819	3.03177	-1,16837474552782	0.00109603	FAM26E	family with sequence similarity 26, member E
ENSG00000149577	47.4428	108.317	-1,16848499111016	7.4089e-06	SIDT2	SID1 transmembrane family, member 2
ENSG00000148468	15.9503	34.2959	-1,1727985117445	1.96166e-05	FAM171A1	family with sequence similarity 171, member A1
ENSG00000151690	2.88654	7.55037	-1,17280006117564	0.0262383	MFSD6	major facilitator superfamily domain containing 6
ENSG00000156535	9.83326	23.0018	-1,17301662269911	1.12192e-06	CD109	CD109 molecule
ENSG00000198945	1.99466	4.14904	-1,17358156600070	0.0243475	L3MBTL3	l(3)mbt-like 3 (Drosophila)
ENSG00000151967	4.04923	23.1761	-1,17461592904374	0.010375	AC063955.1	Schwannomin-interacting protein 1
ENSG00000165030	17.304	41.2239	-1,17515794676696	4.73853e-06	NFIL3	nuclear factor, interleukin 3 regulated
ENSG00000006534	14.2066	32.3765	-1,17711011627185	3.79763e-05	ALDH3B1	aldehyde dehydrogenase 3 family, member B1
ENSG00000187325	2.11441	4.38555	-1,17813884222563	0.0442267	TAF9B	TAF9B RNA polymerase II, TATA box binding protein (TBP)-associated factor, 31kDa
ENSG00000205189	1.21573	2.57145	-1,17847303890294	0.0346108	ZBTB10	zinc finger and BTB domain containing 10
ENSG00000236739	25.6517	60.3002	-1,17865534823928	0.000644569	RP11-370B11.1
ENSG00000145029	9.14615	18.951	-1,17897483394277	0.00391031	NICN1	nicolin 1
ENSG00000100100	16.719	38.8466	-1,17946251743396	5.74683e-05	PIK3IP1	phosphoinositide-3-kinase interacting protein 1
ENSG00000204217	5.93242	13.1523	-1,18066674377942	1.54541e-06	BMPR2	bone morphogenetic protein receptor, type II (serine/threonine kinase)
ENSG00000168300	4.8682	11.827	-1,18248024234337	0.00254497	PCMTD1	protein-L-isoaspartate (D-aspartate) O-methyltransferase domain containing 1
ENSG00000110315	12.8704	26.0023	-1,18396259896685	0.000375844	RNF141	ring finger protein 141
ENSG00000168778	4.28156	9.43369	-1,18546673673701	0.00532504	TCTN2	tectonic family member 2
ENSG00000164741	68.9495	153.736	-1,18569505694561	5.26626e-07	DLC1	deleted in liver cancer 1
ENSG00000160226	8.34543	21.796	-1,18595762528877	0.00234024	C21orf2	chromosome 21 open reading frame 2
ENSG00000116191	7.06076	13.7444	-1,18601189482013	0.00216287	RALGPS2	Ral GEF with PH domain and SH3 binding motif 2
ENSG00000100403	45.1657	104.894	-1,18629597426489	1.85846e-06	ZC3H7B	zinc finger CCCH-type containing 7B
ENSG00000103145	21.0934	51.7652	-1,18638383567494	0.000266773	HCFC1R1	host cell factor C1 regulator 1 (XPO1 dependent)
ENSG00000101825	1.48301	3.59309	-1,18658274828285	0.000517516	MXRA5	matrix-remodelling associated 5
ENSG00000246979	27.1525	64.5751	-1,18675451738443	5.26835e-07	AC009108.1
ENSG00000253873	5.20752	13.3778	-1,18705620207137	0.000142894	PCDHGA11	protocadherin gamma subfamily A, 11
ENSG00000179456	1.98431	4.71466	-1,18807168353861	0.0164896	ZNF238	zinc finger protein 238
ENSG00000169851	22.4538	42.0942	-1,18860082658994	2.2235e-05	PCDH7	protocadherin 7
ENSG00000186908	2.66008	6.44947	-1,18992669437301	0.00144924	ZDHHC17	zinc finger, DHHC-type containing 17
ENSG00000104219	19.5652	45.3763	-1,1910187384442	8.82759e-05	ZDHHC2	zinc finger, DHHC-type containing 2
ENSG00000139324	2.04964	4.73279	-1,19104250962906	0.000511539	TMTC3	transmembrane and tetratricopeptide repeat containing 3
ENSG00000169607	3.84458	5.10442	-1,19159387723871	0.0440719	CKAP2L	cytoskeleton associated protein 2-like
ENSG00000092096	11.9549	31.7697	-1,19269007671403	6.00095e-05	SLC22A17	solute carrier family 22, member 17
ENSG00000099953	7.78541	17.1455	-1,19376001853143	0.0097729	MMP11	matrix metallopeptidase 11 (stromelysin 3)
ENSG00000113657	60.6602	125.672	-1,19630462314046	6.02053e-07	DPYSL3	dihydropyrimidinase-like 3
ENSG00000170190	3.69288	8.71983	-1,19756182035801	0.00936482	SLC16A5	solute carrier family 16, member 5 (monocarboxylic acid transporter 6)
ENSG00000010610	13.5035	18.3234	-1,19830706737793	0.000678904	CD4	CD4 molecule
ENSG00000231091	158.718	374.184	-1,19855859131848	0.00045191	AC138783.13
ENSG00000143147	8.35779	20.3386	-1,19880950184104	0.000354207	GPR161	G protein-coupled receptor 161
ENSG00000148154	24.1629	54.1655	-1,19981260660071	1.25567e-06	UGCG	UDP-glucose ceramide glucosyltransferase
ENSG00000108370	1.51859	3.8306	-1,20074275716308	0.0477151	RGS9	regulator of G-protein signaling 9
ENSG00000117868	11.8527	27.4851	-1,20132199557139	2.2807e-06	ESYT2	extended synaptotagmin-like protein 2
ENSG00000134824	54.1842	126.528	-1,20135479826994	7.85941e-07	FADS2	fatty acid desaturase 2
ENSG00000054983	3.15056	9.05826	-1,20171154018581	0.00250054	GALC	galactosylceramidase
ENSG00000111671	2.82192	7.08472	-1,20259017106068	0.0415307	SPSB2	splA/ryanodine receptor domain and SOCS box containing 2
ENSG00000143845	17.5759	38.425	-1,20277273049857	0.000324248	ETNK2	ethanolamine kinase 2
ENSG00000115365	9.93261	27.8634	-1,20358410598235	0.000130137	LANCL1	LanC lantibiotic synthetase component C-like 1 (bacterial)
ENSG00000244586	16.1611	38.6603	-1,20391036431595	0.00562575	RP11-875H7.4
ENSG00000102189	3.63414	7.22101	-1,20552535203413	9.59616e-05	EEA1	early endosome antigen 1
ENSG00000108582	9.14951	21.4744	-1,20579678913574	9.73141e-07	CPD	carboxypeptidase D
ENSG00000218336	4.84274	10.3116	-1,20729973427733	0.000120348	ODZ3	odz, odd Oz/ten-m homolog 3 (Drosophila)
ENSG00000105971	102.647	243.01	-1,2083668755933	3.32306e-07	CAV2	caveolin 2
ENSG00000109458	7.0035	10.2181	-1,20859831875229	0.0246653	GAB1	GRB2-associated binding protein 1
ENSG00000169504	124.416	248.961	-1,2120499874985	5.91431e-07	CLIC4	chloride intracellular channel 4
ENSG00000164574	89.8261	192.592	-1,21236034816679	4.05441e-07	GALNT10	UDP-N-acetyl-alpha-D-galactosamine:polypeptide N-acetylgalactosaminyltransferase 10 (GalNAc-T10)
ENSG00000108797	14.9893	35.6541	-1,21296357984356	5.26835e-07	CNTNAP1	contactin associated protein 1
ENSG00000164294	44.0552	109.662	-1,21456008316038	7.89462e-07	GPX8	glutathione peroxidase 8 (putative)
ENSG00000233735	18.6702	43.1596	-1,21780830968487	0.00589877	RP11-567G24.3
ENSG00000163755	7.83424	16.3491	-1,21811866685464	9.82172e-05	HPS3	Hermansky-Pudlak syndrome 3
ENSG00000184838	10.8094	27.2891	-1,21843120147343	0.000743169	PRR16	proline rich 16
ENSG00000101846	1.8676	4.47074	-1,22030387278020	0.000790964	STS	steroid sulfatase (microsomal), isozyme S
ENSG00000224407	9.13871	21.8176	-1,22169226130302	0.00266553	RP5-956O18.3
ENSG00000162520	11.2866	26.4828	-1,22418031033178	5.0187e-05	SYNC	syncoilin, intermediate filament protein
ENSG00000243701	3.03107	5.86357	-1,2242615809474	0.0245057	RP11-446H18.3
ENSG00000068489	2.32607	5.75131	-1,22440253690138	0.0207938	PRR11	proline rich 11
ENSG00000174483	17.1738	33.0116	-1,22514570941608	0.000125125	BBS1	Bardet-Biedl syndrome 1
ENSG00000172667	16.1734	30.004	-1,22515185821859	1.18983e-06	ZMAT3	zinc finger, matrin-type 3
ENSG00000214944	8.85271	21.8557	-1,22600184388068	7.57134e-06	RP11-428C6.1	Rho-guanine nucleotide exchange factor
ENSG00000144677	19.7898	38.1085	-1,22761459122584	1.92733e-05	CTDSPL	CTD (carboxy-terminal domain, RNA polymerase II, polypeptide A) small phosphatase-like
ENSG00000109501	46.0308	114.606	-1,22844457632184	4.00833e-07	WFS1	Wolfram syndrome 1 (wolframin)
ENSG00000225339	2.47237	5.9594	-1,22950301969147	0.000688967	RP11-513I15.6
ENSG00000249835	10.9983	26.3816	-1,23007051604507	0.0225783	CTC-348L14.1
ENSG00000176406	3.17532	24.4136	-1,23394319768425	0.0036657	RIMS2	regulating synaptic membrane exocytosis 2
ENSG00000012983	6.5859	15.728	-1,23429093541077	9.34984e-06	MAP4K5	mitogen-activated protein kinase kinase kinase kinase 5
ENSG00000239697	13.3101	34.8902	-1,23492959293903	0.00039326	TNFSF12	tumor necrosis factor (ligand) superfamily, member 12
ENSG00000213854	4.43268	10.9982	-1,23595424517542	0.0354785	CNN2P6	calponin 2 pseudogene 6
ENSG00000198796	5.72477	13.7223	-1,23733349023916	1.46607e-06	ALPK2	alpha-kinase 2
ENSG00000035403	131.851	313.702	-1,23754057739863	2.82588e-06	VCL	vinculin
ENSG00000115841	3.99435	11.3104	-1,23775787133072	0.0182463	FAM82A1	family with sequence similarity 82, member A1
ENSG00000225511	11.5361	25.6033	-1,23782119449622	0.00559878	C9orf44	chromosome 9 open reading frame 44
ENSG00000072657	13.8989	33.2617	-1,23883941602959	3.5253e-07	TRHDE	thyrotropin-releasing hormone degrading enzyme
ENSG00000182218	1.41979	3.25837	-1,23906099885097	0.0277284	HHIPL1	HHIP-like 1
ENSG00000132613	33.1603	81.387	-1,24159295405737	4.71752e-07	MTSS1L	metastasis suppressor 1-like
ENSG00000160613	56.1333	95.0204	-1,24183338035611	2.59924e-07	PCSK7	proprotein convertase subtilisin/kexin type 7
ENSG00000151466	2.70835	6.17282	-1,24333192157697	0.0499079	SCLT1	sodium channel and clathrin linker 1
ENSG00000077809	45.7	103.321	-1,24561287542905	1.67366e-07	GTF2I	general transcription factor IIi
ENSG00000095951	17.1834	15.7796	-1,24610979366202	8.51748e-05	HIVEP1	human immunodeficiency virus type I enhancer binding protein 1
ENSG00000094631	9.34477	26.8243	-1,24632383463001	0.00014274	HDAC6	histone deacetylase 6
ENSG00000107984	17.3874	39.1648	-1,24832984369081	0.000408091	DKK1	dickkopf homolog 1 (Xenopus laevis)
ENSG00000093009	3.11889	8.71725	-1,24848681219783	0.0482048	CDC45	cell division cycle 45 homolog (S. cerevisiae)
ENSG00000129038	80.1265	198.136	-1,25105415202944	4.07047e-07	LOXL1	lysyl oxidase-like 1
ENSG00000110628	17.5917	41.2961	-1,25256999941985	0.000331507	SLC22A18	solute carrier family 22, member 18
ENSG00000172731	1.7005	4.04815	-1,25344479642340	0.0164198	LRRC20	leucine rich repeat containing 20
ENSG00000137075	2.66315	8.5404	-1,25410469760856	0.000815976	RNF38	ring finger protein 38
ENSG00000013288	34.9197	74.9286	-1,25441410684217	2.33829e-07	MAN2B2	mannosidase, alpha, class 2B, member 2
ENSG00000107186	5.21385	13.7936	-1,25507272339887	3.22065e-05	MPDZ	multiple PDZ domain protein
ENSG00000162994	5.8058	15.6195	-1,25576120500914	0.0259279	C2orf63	chromosome 2 open reading frame 63
ENSG00000179981	1.63828	4.0054	-1,25636366227079	0.00291141	TSHZ1	teashirt zinc finger homeobox 1
ENSG00000003436	40.7998	93.059	-1,25641356684327	2.1741e-07	TFPI	tissue factor pathway inhibitor (lipoprotein-associated coagulation inhibitor)
ENSG00000141447	9.97382	24.9626	-1,25809126642218	7.99879e-06	OSBPL1A	oxysterol binding protein-like 1A
ENSG00000163848	12.5002	24.0712	-1,26074174543202	0.00012818	ZNF148	zinc finger protein 148
ENSG00000152558	68.7059	156.48	-1,2634787330437	1.17629e-07	TMEM123	transmembrane protein 123
ENSG00000166741	33.0322	86.2241	-1,26499286967718	2.59651e-05	NNMT	nicotinamide N-methyltransferase
ENSG00000253953	8.4427	20.8277	-1,26500814546117	9.32027e-07	PCDHGB4	protocadherin gamma subfamily B, 4
ENSG00000118515	23.4421	62.0591	-1,26506600686128	3.62974e-06	SGK1	serum/glucocorticoid regulated kinase 1
ENSG00000091136	174.167	433.972	-1,26555773321243	1.14328e-06	LAMB1	laminin, beta 1
ENSG00000164674	4.25096	11.6745	-1,26607495175962	0.00305883	SYTL3	synaptotagmin-like 3
ENSG00000186854	15.5499	37.2962	-1,26664902284913	4.72834e-05	C2orf89	chromosome 2 open reading frame 89
ENSG00000148120	7.57584	17.6388	-1,26769487115316	0.00198496	C9orf3	chromosome 9 open reading frame 3
ENSG00000154678	7.00463	15.1271	-1,26973514887075	0.000240871	PDE1C	phosphodiesterase 1C, calmodulin-dependent 70kDa
ENSG00000172594	4.43486	10.4708	-1,27016875810840	0.00411629	SMPDL3A	sphingomyelin phosphodiesterase, acid-like 3A
ENSG00000010704	5.94185	14.9393	-1,27092794590748	0.0051825	HFE	hemochromatosis
ENSG00000196526	17.28	38.7413	-1,27102347932683	1.02094e-07	AFAP1	actin filament associated protein 1
ENSG00000168615	90.269	220.924	-1,27157159765820	9.86889e-08	ADAM9	ADAM metallopeptidase domain 9
ENSG00000108846	20.2502	34.5505	-1,27174780553293	6.96919e-06	ABCC3	ATP-binding cassette, sub-family C (CFTR/MRP), member 3
ENSG00000170271	7.16742	9.91618	-1,27417215380934	0.00513796	C5orf4	chromosome 5 open reading frame 4
ENSG00000073712	21.1304	53.1391	-1,27483936109450	1.36159e-07	FERMT2	fermitin family member 2
ENSG00000133812	16.3074	35.5097	-1,27500358254442	7.34056e-06	SBF2	SET binding factor 2
ENSG00000100625	2.01037	4.98831	-1,27770552579222	0.000341267	SIX4	SIX homeobox 4
ENSG00000008441	19.3019	47.9364	-1,27795047070461	1.63941e-07	NFIX	nuclear factor I/X (CCAAT-binding transcription factor)
ENSG00000176020	1.06256	2.78727	-1,28041983719682	0.0245974	AMIGO3	adhesion molecule with Ig-like domain 3
ENSG00000132386	9.05002	23.181	-1,28074661691691	0.000145579	SERPINF1	serpin peptidase inhibitor, clade F (alpha-2 antiplasmin, pigment epithelium derived factor), member 1
ENSG00000178184	6.75488	11.6105	-1,28087841727328	0.00154562	PARD6G	par-6 partitioning defective 6 homolog gamma (C. elegans)
ENSG00000184271	1.24308	3.02643	-1,28093864238647	0.0234558	POU6F1	POU class 6 homeobox 1
ENSG00000114019	91.4353	233.523	-1,28110341348458	1.14546e-07	AMOTL2	angiomotin like 2
ENSG00000146802	5.95279	13.6367	-1,28143191959625	0.0043726	TMEM168	transmembrane protein 168
ENSG00000111684	18.0311	46.9404	-1,28201104994292	5.78188e-05	LPCAT3	lysophosphatidylcholine acyltransferase 3
ENSG00000172716	9.42543	13.7863	-1,28229204283648	0.00430609	SLFN11	schlafen family member 11
ENSG00000067167	107.277	254.87	-1,28345917158497	3.85012e-08	TRAM1	translocation associated membrane protein 1
ENSG00000136111	1.01978	3.46868	-1,28372109904598	0.0149152	TBC1D4	TBC1 domain family, member 4
ENSG00000146072	5.61136	14.1518	-1,28458596509837	1.9073e-05	TNFRSF21	tumor necrosis factor receptor superfamily, member 21
ENSG00000198554	1.44861	3.39632	-1,28597050908646	0.0454753	WDHD1	WD repeat and HMG-box DNA binding protein 1
ENSG00000199060	340.345	865.525	-1,28690438498910	2.49587e-06	MIR22	microRNA 22
ENSG00000251022	3.18518	10.0798	-1,28754811422525	0.0191341	RP11-163O17.1
ENSG00000102057	2.49434	5.21584	-1,28773122754233	0.0218796	KCND1	potassium voltage-gated channel, Shal-related subfamily, member 1
ENSG00000134291	9.27536	23.9802	-1,28821831053596	0.000139189	TMEM106C	transmembrane protein 106C
ENSG00000071967	46.9835	104.991	-1,28839295947711	1.1251e-07	CYBRD1	cytochrome b reductase 1
ENSG00000119280	16.7608	37.8369	-1,29073657065695	2.07746e-07	C1orf198	chromosome 1 open reading frame 198
ENSG00000145730	141.672	310.864	-1,29817314239016	4.03847e-08	PAM	peptidylglycine alpha-amidating monooxygenase
ENSG00000088325	3.21324	8.23881	-1,29861627832239	0.000357428	TPX2	TPX2, microtubule-associated, homolog (Xenopus laevis)
ENSG00000116750	8.97072	17.095	-1,29894155662436	0.00179584	UCHL5	ubiquitin carboxyl-terminal hydrolase L5
ENSG00000181690	1.56525	3.26134	-1,29996056689735	0.00979417	PLAG1	pleiomorphic adenoma gene 1
ENSG00000067141	11.7574	29.9944	-1,30008590512849	6.90614e-08	NEO1	neogenin 1
ENSG00000058056	7.35932	15.4663	-1,30086060259716	2.8201e-05	USP13	ubiquitin specific peptidase 13 (isopeptidase T-3)
ENSG00000112078	23.3286	52.3361	-1,30267044177783	8.91534e-08	KCTD20	potassium channel tetramerisation domain containing 20
ENSG00000186594	8.90251	22.4897	-1,30327782649052	0.00026053	C17orf91	chromosome 17 open reading frame 91
ENSG00000177200	2.35297	5.79791	-1,30415726575290	3.25308e-05	CHD9	chromodomain helicase DNA binding protein 9
ENSG00000149582	18.5478	41.7317	-1,30722468846732	0.000102238	TMEM25	transmembrane protein 25
ENSG00000184445	3.52471	17.0674	-1,30877900905826	0.00569855	KNTC1	kinetochore associated 1
ENSG00000235162	43.107	112.407	-1,30945610854337	5.72099e-08	C12orf75	chromosome 12 open reading frame 75
ENSG00000115318	16.2596	46.9743	-1,31164378835049	2.7975e-07	LOXL3	lysyl oxidase-like 3
ENSG00000113369	16.3298	36.301	-1,31426557897883	5.27165e-05	ARRDC3	arrestin domain containing 3
ENSG00000138134	10.3234	26.6291	-1,31478341890425	7.32874e-06	STAMBPL1	STAM binding protein-like 1
ENSG00000172037	394.087	981.357	-1,31515462444335	1.35415e-06	LAMB2	laminin, beta 2 (laminin S)
ENSG00000144810	33.6234	71.7416	-1,31657550202884	1.15765e-07	COL8A1	collagen, type VIII, alpha 1
ENSG00000145860	36.6327	106.062	-1,31738761937957	4.4873e-08	RNF145	ring finger protein 145
ENSG00000131634	5.0914	13.2646	-1,31773613091819	0.0121958	TMEM204	transmembrane protein 204
ENSG00000197646	7.4674	19.4687	-1,31848068757009	2.99874e-05	PDCD1LG2	programmed cell death 1 ligand 2
ENSG00000161800	2.58748	7.01031	-1,31896484261751	0.00108124	RACGAP1	Rac GTPase activating protein 1
ENSG00000213347	8.05187	13.7458	-1,32011631445128	0.00124819	MXD3	MAX dimerization protein 3
ENSG00000111885	2.24769	5.63802	-1,32044422408606	0.000288525	MAN1A1	mannosidase, alpha, class 1A, member 1
ENSG00000240771	9.6765	27.9915	-1,32113177024592	0.000232044	ARHGEF25	Rho guanine nucleotide exchange factor (GEF) 25
ENSG00000164307	13.055	31.2362	-1,32288882051335	3.47824e-05	ERAP1	endoplasmic reticulum aminopeptidase 1
ENSG00000156162	11.2651	28.9429	-1,32498999714898	0.000334041	DPY19L4	dpy-19-like 4 (C. elegans)
ENSG00000196693	4.27595	10.9623	-1,32569509826162	0.0317434	ZNF33B	zinc finger protein 33B
ENSG00000182700	1.08366	2.79411	-1,33041094955049	0.045421	C5orf53	chromosome 5 open reading frame 53
ENSG00000196507	3.84058	10.5491	-1,3325181709052	0.01071	TCEAL3	transcription elongation factor A (SII)-like 3
ENSG00000182326	74.1578	239.014	-1,33425662322179	1.18481e-08	C1S	complement component 1, s subcomponent
ENSG00000146281	0.958857	2.48545	-1,33527989414360	0.0137233	PM20D2	peptidase M20 domain containing 2
ENSG00000112992	12.9284	27.3121	-1,33712463670382	3.90219e-06	NNT	nicotinamide nucleotide transhydrogenase
ENSG00000177943	2.59667	5.65274	-1,33764381740845	0.00170441	MAMDC4	MAM domain containing 4
ENSG00000123358	4.55319	11.8072	-1,33815363315109	0.0001989	NR4A1	nuclear receptor subfamily 4, group A, member 1
ENSG00000165617	3.21248	8.92138	-1,33825161802916	0.000711305	DACT1	dapper, antagonist of beta-catenin, homolog 1 (Xenopus laevis)
ENSG00000117242	0.922243	2.4304	-1,33842821710331	0.0137405	PINK1-AS1	PINK1 antisense RNA 1 (non-protein coding)
ENSG00000101290	28.4833	49.6169	-1,33859081998702	9.10656e-08	CDS2	CDP-diacylglycerol synthase (phosphatidate cytidylyltransferase) 2
ENSG00000105429	5.64047	14.2549	-1,33921960038718	1.4362e-07	MEGF8	multiple EGF-like-domains 8
ENSG00000006576	4.20346	13.2455	-1,34073813433706	0.000126356	PHTF2	putative homeodomain transcription factor 2
ENSG00000180628	10.9422	18.5795	-1,34173804150538	4.8607e-05	PCGF5	polycomb group ring finger 5
ENSG00000125257	21.5344	56.2372	-1,34288470767763	1.2258e-08	ABCC4	ATP-binding cassette, sub-family C (CFTR/MRP), member 4
ENSG00000117020	8.08513	17.3584	-1,34440204190503	5.07997e-06	AKT3	v-akt murine thymoma viral oncogene homolog 3 (protein kinase B, gamma)
ENSG00000114737	2.40335	6.62229	-1,34518928604116	0.00689944	CISH	cytokine inducible SH2-containing protein
ENSG00000145725	9.89533	24.3946	-1,34524446600002	7.2605e-05	PPIP5K2	diphosphoinositol pentakisphosphate kinase 2
ENSG00000022267	64.0475	161.927	-1,34531898866659	3.77307e-08	FHL1	four and a half LIM domains 1
ENSG00000125966	1.30714	3.26578	-1,34697811389581	0.0218177	MMP24	matrix metallopeptidase 24 (membrane-inserted)
ENSG00000115232	9.38298	20.3986	-1,34818035389681	3.62933e-05	ITGA4	integrin, alpha 4 (antigen CD49D, alpha 4 subunit of VLA-4 receptor)
ENSG00000164117	2.09162	5.82898	-1,34849621376576	0.0483848	FBXO8	F-box protein 8
ENSG00000075702	1.20925	2.77453	-1,35082686013493	0.0151257	WDR62	WD repeat domain 62
ENSG00000104332	191.453	474.451	-1,35103642737739	4.40333e-06	SFRP1	secreted frizzled-related protein 1
ENSG00000198887	2.88124	7.13893	-1,35217839488036	0.000749002	SMC5	structural maintenance of chromosomes 5
ENSG00000198001	1.88383	5.04715	-1,35271798981393	0.00224235	IRAK4	interleukin-1 receptor-associated kinase 4
ENSG00000164932	167.241	464.71	-1,35468612296455	9.27482e-09	CTHRC1	collagen triple helix repeat containing 1
ENSG00000140092	33.5762	89.3758	-1,35517630606745	2.11415e-08	FBLN5	fibulin 5
ENSG00000112210	8.16249	22.2631	-1,35704819378298	3.56873e-06	RAB23	RAB23, member RAS oncogene family
ENSG00000170004	43.4097	101.813	-1,35711716138973	1.31579e-08	CHD3	chromodomain helicase DNA binding protein 3
ENSG00000213462	2.64483	5.58097	-1,35772100172472	0.0165494	ERV3	endogenous retroviral sequence 3
ENSG00000129636	13.3204	35.227	-1,35839913446427	9.21499e-07	ITFG1	integrin alpha FG-GAP repeat containing 1
ENSG00000110108	29.4275	73.3244	-1,35901336797159	3.45996e-07	TMEM109	transmembrane protein 109
ENSG00000197724	2.70783	7.05161	-1,36205480321443	3.91299e-05	PHF2	PHD finger protein 2
ENSG00000112312	3.14227	7.9252	-1,36664752064635	0.0287519	GMNN	geminin, DNA replication inhibitor
ENSG00000171132	11.881	23.8359	-1,36731020931177	0.00053805	PRKCE	protein kinase C, epsilon
ENSG00000107036	10.3201	26.6454	-1,37049431280579	8.82509e-08	KIAA1432	KIAA1432
ENSG00000162929	3.45216	9.08322	-1,37108155042781	0.0257349	KIAA1841	KIAA1841
ENSG00000135776	2.66612	6.5207	-1,37139096735796	0.00353402	ABCB10	ATP-binding cassette, sub-family B (MDR/TAP), member 10
ENSG00000010292	10.4486	29.4227	-1,37147308960418	6.83204e-05	NCAPD2	non-SMC condensin I complex, subunit D2
ENSG00000139174	2.47029	6.64506	-1,37185218262307	0.000268707	PRICKLE1	prickle homolog 1 (Drosophila)
ENSG00000107821	6.12932	14.7014	-1,37252001581592	0.0036679	KAZALD1	Kazal-type serine peptidase inhibitor domain 1
ENSG00000170989	2.61091	6.61569	-1,37395951915206	0.0165494	S1PR1	sphingosine-1-phosphate receptor 1
ENSG00000167157	18.2606	50.9633	-1,37724689483300	1.38433e-06	PRRX2	paired related homeobox 2
ENSG00000188452	2.44977	4.67066	-1,37759104509171	0.0470886	CERKL	ceramide kinase-like
ENSG00000112186	11.4422	31.4463	-1,37834377346554	1.23248e-05	CAP2	CAP, adenylate cyclase-associated protein, 2 (yeast)
ENSG00000197119	3.78187	10.3512	-1,38089689104689	0.000499238	SLC25A29	solute carrier family 25, member 29
ENSG00000136044	7.71028	21.2238	-1,38331417116789	1.10311e-06	APPL2	adaptor protein, phosphotyrosine interaction, PH domain and leucine zipper containing 2
ENSG00000109756	24.5018	52.1909	-1,38343748831743	1.80766e-07	RAPGEF2	Rap guanine nucleotide exchange factor (GEF) 2
ENSG00000008256	18.9907	41.9847	-1,38363313189733	6.03017e-07	CYTH3	cytohesin 3
ENSG00000101745	2.41229	5.54081	-1,38368766383038	5.8793e-05	ANKRD12	ankyrin repeat domain 12
ENSG00000180354	3.32832	7.4989	-1,38470368700379	0.00405369	C7orf41	chromosome 7 open reading frame 41
ENSG00000121957	2.22289	5.27243	-1,38747989636275	0.0266286	GPSM2	G-protein signaling modulator 2
ENSG00000141258	6.2702	16.8293	-1,38784178923211	4.53409e-07	SGSM2	small G protein signaling modulator 2
ENSG00000125384	2.81061	7.62729	-1,38878422504837	0.00169057	PTGER2	prostaglandin E receptor 2 (subtype EP2), 53kDa
ENSG00000200278	27.8669	71.9155	-1,38935392533342	0.0342278	5S_rRNA.69	5S ribosomal RNA
ENSG00000090889	0.888893	2.61432	-1,3895662532887	0.0309387	KIF4A	kinesin family member 4A
ENSG00000220785	1.87672	4.95582	-1,38984176314269	0.0202319	MTMR9LP	myotubularin related protein 9-like, pseudogene
ENSG00000142599	52.8183	112.372	-1,39111673223372	7.42695e-09	RERE	arginine-glutamic acid dipeptide (RE) repeats
ENSG00000234456	31.6343	83.6088	-1,39147459593749	2.56269e-06	AC004945.2
ENSG00000123374	17.3192	47.6452	-1,39191599967342	2.19928e-07	CDK2	cyclin-dependent kinase 2
ENSG00000166912	3.83526	8.57959	-1,39405341832987	4.91988e-05	MTMR10	myotubularin related protein 10
ENSG00000140416	242.717	646.846	-1,39776571782002	2.96038e-07	TPM1	tropomyosin 1 (alpha)
ENSG00000100321	21.0385	57.3827	-1,39943498068497	2.11204e-06	SYNGR1	synaptogyrin 1
ENSG00000162976	12.8992	31.8581	-1,40006407237441	0.000446158	PQLC3	PQ loop repeat containing 3
ENSG00000085224	5.695	13.499	-1,40069623269614	2.06828e-06	ATRX	alpha thalassemia/mental retardation syndrome X-linked
ENSG00000064687	2.499	5.22209	-1,40216682560544	0.0496278	ABCA7	ATP-binding cassette, sub-family A (ABC1), member 7
ENSG00000122952	4.26434	12.9989	-1,40264672911224	0.00308142	ZWINT	ZW10 interactor
ENSG00000136108	3.27365	11.6779	-1,40298900797638	0.000915849	CKAP2	cytoskeleton associated protein 2
ENSG00000074047	5.50554	14.7428	-1,40316288544139	1.35902e-06	GLI2	GLI family zinc finger 2
ENSG00000165512	1.72079	4.79257	-1,40432941687142	0.00639915	ZNF22	zinc finger protein 22 (KOX 15)
ENSG00000186951	2.34037	10.8929	-1,40720722274895	8.77306e-05	PPARA	peroxisome proliferator-activated receptor alpha
ENSG00000173156	9.56128	27.0103	-1,40730046350800	0.00043543	RHOD	ras homolog gene family, member D
ENSG00000141736	11.2349	30.1843	-1,40813341763522	5.14001e-08	ERBB2	v-erb-b2 erythroblastic leukemia viral oncogene homolog 2, neuro/glioblastoma derived oncogene homolog (avian)
ENSG00000225282	9.06182	25.1401	-1,40851872917695	7.88282e-06	AP000350.6
ENSG00000215570	2.34879	6.35218	-1,40881117294989	0.0066669	AL136219.1
ENSG00000222999	394.299	1092.36	-1,40890964397528	3.05088e-08	AC105247.1
ENSG00000113391	4.99362	12.8725	-1,41123042007736	0.00376347	FAM172A	family with sequence similarity 172, member A
ENSG00000109790	83.2728	215.732	-1,41213091426611	1.91899e-09	KLHL5	kelch-like 5 (Drosophila)
ENSG00000167371	1.07716	3.03856	-1,41281689479161	0.0195895	PRRT2	proline-rich transmembrane protein 2
ENSG00000165406	4.41387	11.7057	-1,41294935504434	9.91893e-05	MARCH8	membrane-associated ring finger (C3HC4) 8
ENSG00000180801	18.0554	46.7014	-1,41389949168872	3.57554e-08	ARSJ	arylsulfatase family, member J
ENSG00000149639	4.38819	11.6862	-1,41421315660085	5.28867e-08	KIAA0889	KIAA0889
ENSG00000178904	3.38249	7.44228	-1,41463015466382	7.08505e-05	DPY19L3	dpy-19-like 3 (C. elegans)
ENSG00000147548	13.502	26.4172	-1,41508898193616	6.57063e-07	WHSC1L1	Wolf-Hirschhorn syndrome candidate 1-like 1
ENSG00000251192	2.88875	5.61392	-1,41513618400351	0.0496228	ZNF674	zinc finger protein 674
ENSG00000093100	2.42857	6.43482	-1,41580894186701	7.23229e-05	XXbac-B461K10.4	protein MICAL-3 isoform 1
ENSG00000171843	7.87677	15.5933	-1,41614981130211	0.00142882	MLLT3	myeloid/lymphoid or mixed-lineage leukemia (trithorax homolog, Drosophila); translocated to, 3
ENSG00000112118	5.76663	14.8032	-1,41673652848728	2.08724e-05	MCM3	minichromosome maintenance complex component 3
ENSG00000188112	3.32699	8.8048	-1,41713019795519	1.34326e-05	C6orf132	chromosome 6 open reading frame 132
ENSG00000084112	16.2548	40.7964	-1,42149126380068	2.78455e-09	SSH1	slingshot homolog 1 (Drosophila)
ENSG00000073605	1.57568	3.66489	-1,42187332016951	0.0248015	GSDMB	gasdermin B
ENSG00000070018	12.0547	28.6814	-1,42196070937178	5.72497e-07	LRP6	low density lipoprotein receptor-related protein 6
ENSG00000168685	16.0564	38.5976	-1,42199799978692	4.42963e-08	IL7R	interleukin 7 receptor
ENSG00000144455	6.00347	15.9521	-1,42282569281543	0.000125691	SUMF1	sulfatase modifying factor 1
ENSG00000247614	2.91371	7.84429	-1,4237439905215	0.0316264	AC119673.1
ENSG00000183688	8.87406	24.5266	-1,42491524803791	9.59347e-08	FAM101B	family with sequence similarity 101, member B
ENSG00000197565	2.40164	6.8101	-1,42782907792594	0.000236898	COL4A6	collagen, type IV, alpha 6
ENSG00000198189	5.07143	12.9695	-1,42853288497051	0.00321107	HSD17B11	hydroxysteroid (17-beta) dehydrogenase 11
ENSG00000170775	10.8707	30.4541	-1,42870978235284	4.77883e-08	GPR37	G protein-coupled receptor 37 (endothelin receptor type B-like)
ENSG00000124006	16.7879	50.3637	-1,43123413975032	4.5834e-08	OBSL1	obscurin-like 1
ENSG00000031003	6.38824	16.7465	-1,43185938782017	4.64512e-06	FAM13B	family with sequence similarity 13, member B
ENSG00000137312	87.3993	240.914	-1,43258271299584	2.96699e-09	FLOT1	flotillin 1
ENSG00000186919	3.66822	9.68974	-1,43317652102216	0.0024359	ZACN	zinc activated ligand-gated ion channel
ENSG00000185532	2.97336	7.28156	-1,43342185280976	6.83307e-05	PRKG1	protein kinase, cGMP-dependent, type I
ENSG00000165996	11.6831	30.4169	-1,43706443784049	0.000187789	PTPLA	protein tyrosine phosphatase-like (proline instead of catalytic arginine), member A
ENSG00000154380	25.7066	68.3325	-1,4380011073335	6.02932e-09	ENAH	enabled homolog (Drosophila)
ENSG00000107104	14.1409	11.1643	-1,44069793668426	1.59587e-06	KANK1	KN motif and ankyrin repeat domains 1
ENSG00000165685	1.8431	5.23869	-1,44100688818337	0.0305225	C12orf59	chromosome 12 open reading frame 59
ENSG00000103449	12.1181	30.0869	-1,44180372238772	2.76164e-08	SALL1	sal-like 1 (Drosophila)
ENSG00000121578	13.9871	49.4408	-1,44232664518322	2.08302e-06	B4GALT4	UDP-Gal:betaGlcNAc beta 1,4- galactosyltransferase, polypeptide 4
ENSG00000075826	3.32498	6.05277	-1,44273701613581	0.0108767	SEC31B	SEC31 homolog B (S. cerevisiae)
ENSG00000135269	19.4309	62.1786	-1,44468542058098	5.89034e-07	TES	testis derived transcript (3 LIM domains)
ENSG00000113805	1.91522	4.46095	-1,44522102583438	0.00280025	CNTN3	contactin 3 (plasmacytoma associated)
ENSG00000172830	15.3382	44.5475	-1,44910200107460	2.88379e-06	SSH3	slingshot homolog 3 (Drosophila)
ENSG00000198873	12.2924	35.3085	-1,45034242118063	4.98564e-07	GRK5	G protein-coupled receptor kinase 5
ENSG00000122642	152.583	437.346	-1,4503683484777	2.01e-09	FKBP9	FK506 binding protein 9, 63 kDa
ENSG00000152953	3.42832	9.63397	-1,45126680592454	0.000742541	STK32B	serine/threonine kinase 32B
ENSG00000136205	42.2759	117.686	-1,45707356820188	3.52822e-09	TNS3	tensin 3
ENSG00000196628	4.17263	11.4699	-1,45759129582634	5.738e-07	TCF4	transcription factor 4
ENSG00000102760	32.9217	97.6995	-1,45761909382975	1.86678e-07	C13orf15	chromosome 13 open reading frame 15
ENSG00000131171	19.9913	55.1315	-1,45835221989065	1.53441e-07	SH3BGRL	SH3 domain binding glutamic acid-rich protein like
ENSG00000179403	1.89876	4.60631	-1,46087299094798	0.0138484	VWA1	von Willebrand factor A domain containing 1
ENSG00000159200	24.0149	75.8283	-1,46163770682221	1.09405e-09	RCAN1	regulator of calcineurin 1
ENSG00000114698	1.66696	5.97011	-1,46173448795075	0.0200786	PLSCR4	phospholipid scramblase 4
ENSG00000003989	3.06147	9.22211	-1,46184302563554	1.8847e-07	SLC7A2	solute carrier family 7 (cationic amino acid transporter, y+ system), member 2
ENSG00000173517	3.89165	10.9175	-1,46274693980926	8.77492e-09	AC087465.1	Pseudopodium-enriched atypical kinase 1
ENSG00000118762	24.8925	63.0663	-1,46545411959620	7.05936e-09	PKD2	polycystic kidney disease 2 (autosomal dominant)
ENSG00000164066	3.52897	9.0372	-1,46568759217339	0.016807	INTU	inturned planar cell polarity effector homolog (Drosophila)
ENSG00000134318	12.373	34.5098	-1,46823035813592	3.93254e-09	ROCK2	Rho-associated, coiled-coil containing protein kinase 2
ENSG00000214147	3.30637	9.19635	-1,47209939615875	0.00907678	RP11-332P22.2
ENSG00000171848	14.5078	42.1483	-1,47221420298703	3.34595e-06	RRM2	ribonucleotide reductase M2
ENSG00000069869	14.1061	43.9676	-1,47254135866067	1.02951e-09	NEDD4	neural precursor cell expressed, developmentally down-regulated 4
ENSG00000122694	13.0545	38.3746	-1,47265389249874	1.07678e-06	GLIPR2	GLI pathogenesis-related 2
ENSG00000142303	1.02486	2.92291	-1,47360487287636	0.00481045	ADAMTS10	ADAM metallopeptidase with thrombospondin type 1 motif, 10
ENSG00000196562	2.1604	3.71306	-1,47613330086224	0.0421073	SULF2	sulfatase 2
ENSG00000232220	20.3583	60.434	-1,47979557458344	8.4167e-05	AC008440.5
ENSG00000176826	17.4392	50.7377	-1,47983347014279	1.94182e-08	FKBP9L	FK506 binding protein 9-like
ENSG00000116774	11.3475	33.5288	-1,4830417361942	4.82469e-07	OLFML3	olfactomedin-like 3
ENSG00000171992	13.1377	41.2335	-1,48360943463154	2.57997e-09	SYNPO	synaptopodin
ENSG00000072133	2.60418	6.60772	-1,48957549990521	0.0122149	RPS6KA6	ribosomal protein S6 kinase, 90kDa, polypeptide 6
ENSG00000196177	2.01822	5.72278	-1,49185836905524	0.0114589	ACADSB	acyl-CoA dehydrogenase, short/branched chain
ENSG00000155755	1.41264	7.88029	-1,49310783522023	0.00128115	ALS2CR4	amyotrophic lateral sclerosis 2 (juvenile) chromosome region, candidate 4
ENSG00000162576	244.539	715.271	-1,49569989286829	1.1009e-08	MXRA8	matrix-remodelling associated 8
ENSG00000092140	1.48117	4.33578	-1,49694687106588	0.00793572	G2E3	G2/M-phase specific E3 ubiquitin protein ligase
ENSG00000165124	3.3832	10.6446	-1,49862110465596	3.10816e-08	SVEP1	sushi, von Willebrand factor type A, EGF and pentraxin domain containing 1
ENSG00000142794	5.4534	14.0359	-1,49893237151745	3.33186e-05	NBPF3	neuroblastoma breakpoint family, member 3
ENSG00000182621	1.89493	5.01114	-1,49900467812648	0.00149043	PLCB1	phospholipase C, beta 1 (phosphoinositide-specific)
ENSG00000187244	9.05712	26.4305	-1,50090033125586	2.99681e-07	BCAM	basal cell adhesion molecule (Lutheran blood group)
ENSG00000125648	5.93933	16.5935	-1,50106379989367	2.02966e-05	SLC25A23	solute carrier family 25 (mitochondrial carrier; phosphate carrier), member 23
ENSG00000113140	1160.32	3260.79	-1,50121009145106	2.20226e-05	SPARC	secreted protein, acidic, cysteine-rich (osteonectin)
ENSG00000071794	4.60861	12.2229	-1,50186074126468	8.43429e-05	HLTF	helicase-like transcription factor
ENSG00000185379	3.52085	10.8377	-1,50194236658242	0.00188211	RAD51L3	RAD51-like 3 (S. cerevisiae)
ENSG00000165757	36.0538	98.3357	-1,50362005279036	3.74225e-10	KIAA1462	KIAA1462
ENSG00000173230	7.15176	21.3421	-1,50449271908926	1.48732e-08	GOLGB1	golgin B1
ENSG00000214021	12.3483	32.7933	-1,50527206355998	2.19161e-06	TTLL3	tubulin tyrosine ligase-like family, member 3
ENSG00000166923	142.889	432.779	-1,50530602228534	1.93019e-07	GREM1	gremlin 1
ENSG00000151914	21.2954	62.394	-1,50646054975083	4.9739e-10	DST	dystonin
ENSG00000182511	4.75231	14.3903	-1,50889322270056	0.00326636	FES	feline sarcoma oncogene
ENSG00000164050	20.41	56.7973	-1,50926049103874	5.40349e-08	PLXNB1	plexin B1
ENSG00000241644	9.28877	29.5042	-1,51143137607547	1.46132e-06	INMT	indolethylamine N-methyltransferase
ENSG00000004399	47.7063	145.092	-1,51209034561232	1.68409e-09	PLXND1	plexin D1
ENSG00000215252	1.43224	4.11266	-1,51430003419018	0.000283913	GOLGA8B	golgin A8 family, member B
ENSG00000116962	14.7252	42.0544	-1,5157261758451	5.43449e-10	NID1	nidogen 1
ENSG00000110237	44.4048	117.998	-1,51747289143509	5.52652e-10	ARHGEF17	Rho guanine nucleotide exchange factor (GEF) 17
ENSG00000134030	13.7233	37.2471	-1,51877448458522	1.39717e-09	CTIF	CBP80/20-dependent translation initiation factor
ENSG00000145808	3.62038	9.4701	-1,51968388726936	0.000472779	ADAMTS19	ADAM metallopeptidase with thrombospondin type 1 motif, 19
ENSG00000140443	4.13961	12.104	-1,52047052555682	2.00616e-09	IGF1R	insulin-like growth factor 1 receptor
ENSG00000168306	3.74012	8.86961	-1,52094641686468	0.00767086	ACOX2	acyl-CoA oxidase 2, branched chain
ENSG00000136059	1.68908	6.70447	-1,52129767521232	0.0112689	VILL	villin-like
ENSG00000144857	1.59114	4.7464	-1,52206818718114	0.0330341	BOC	Boc homolog (mouse)
ENSG00000137845	69.7614	196.426	-1,52207710164061	2.26797e-10	ADAM10	ADAM metallopeptidase domain 10
ENSG00000154237	3.90299	10.9295	-1,52223827134551	3.48521e-06	LRRK1	leucine-rich repeat kinase 1
ENSG00000157613	110.357	334.679	-1,52491622675621	6.7769e-10	CREB3L1	cAMP responsive element binding protein 3-like 1
ENSG00000153944	3.43901	11.0373	-1,52809750879379	0.000514291	MSI2	musashi homolog 2 (Drosophila)
ENSG00000013297	33.5172	95.054	-1,53081714793041	4.61263e-09	CLDN11	claudin 11
ENSG00000196586	4.7069	14.7542	-1,53211537063898	4.99084e-07	MYO6	myosin VI
ENSG00000101974	4.6444	16.6421	-1,53238832415109	1.00217e-05	ATP11C	ATPase, class VI, type 11C
ENSG00000078804	12.8802	34.6577	-1,53574274703002	3.25575e-09	TP53INP2	tumor protein p53 inducible nuclear protein 2
ENSG00000134294	56.6919	168.156	-1,53603979349474	1.95713e-09	SLC38A2	solute carrier family 38, member 2
ENSG00000183160	2.33398	6.75823	-1,53624753574385	0.00130597	TMEM119	transmembrane protein 119
ENSG00000197442	10.1238	32.1905	-1,53692602009551	1.35222e-08	MAP3K5	mitogen-activated protein kinase kinase kinase 5
ENSG00000168077	35.5026	104.464	-1,53750297528782	6.44552e-10	SCARA3	scavenger receptor class A, member 3
ENSG00000147202	2.49576	6.77393	-1,53789253359152	7.14655e-06	DIAPH2	diaphanous homolog 2 (Drosophila)
ENSG00000150457	22.4114	64.5763	-1,54049717784707	6.12429e-10	LATS2	LATS, large tumor suppressor, homolog 2 (Drosophila)
ENSG00000143867	3.31007	11.367	-1,54308217953835	1.73988e-05	OSR1	odd-skipped related 1 (Drosophila)
ENSG00000152284	4.6201	12.9756	-1,54341620534203	7.82311e-06	TCF7L1	transcription factor 7-like 1 (T-cell specific, HMG-box)
ENSG00000125378	1.13514	3.52043	-1,54362116609517	0.0265839	BMP4	bone morphogenetic protein 4
ENSG00000151617	7.21324	21.1216	-1,54410271840346	2.31881e-05	EDNRA	endothelin receptor type A
ENSG00000117906	8.39753	25.7744	-1,54429526343708	1.10917e-06	RCN2	reticulocalbin 2, EF-hand calcium binding domain
ENSG00000072422	13.6185	29.8002	-1,54446469744065	1.32297e-05	RHOBTB1	Rho-related BTB domain containing 1
ENSG00000177425	3.97302	11.8321	-1,54542431429288	0.000140881	PAWR	PRKC, apoptosis, WT1, regulator
ENSG00000113810	8.38218	26.1174	-1,54673527281349	1.773e-05	SMC4	structural maintenance of chromosomes 4
ENSG00000187079	21.5518	57.0735	-1,54686866516681	1.0871e-10	TEAD1	TEA domain family member 1 (SV40 transcriptional enhancer factor)
ENSG00000152465	12.4349	35.8835	-1,54767488663483	1.03525e-07	NMT2	N-myristoyltransferase 2
ENSG00000187098	4.74816	19.4441	-1,55023239834023	8.81094e-06	MITF	microphthalmia-associated transcription factor
ENSG00000130702	5.33572	15.6095	-1,55035311792828	5.10329e-05	LAMA5	laminin, alpha 5
ENSG00000161395	2.69303	8.2858	-1,55051739840468	0.00169057	PGAP3	post-GPI attachment to proteins 3
ENSG00000248905	4.88588	14.3562	-1,5511751224324	3.70555e-10	FMN1	formin 1
ENSG00000152127	33.2116	103.678	-1,55597026532289	1.11002e-10	MGAT5	mannosyl (alpha-1,6-)-glycoprotein beta-1,6-N-acetyl-glucosaminyltransferase
ENSG00000154920	2.74931	6.19833	-1,56042170872899	0.00662373	EME1	essential meiotic endonuclease 1 homolog 1 (S. pombe)
ENSG00000127990	30.2218	98.367	-1,56378493294514	3.4545e-08	SGCE	sarcoglycan, epsilon
ENSG00000038382	105.187	336.074	-1,56432977780908	1.14945e-09	TRIO	triple functional domain (PTPRF interacting)
ENSG00000163520	14.8	32.114	-1,56467692729054	3.74454e-08	FBLN2	fibulin 2
ENSG00000127564	1.94658	5.75417	-1,56636798467525	0.00923354	PKMYT1	protein kinase, membrane associated tyrosine/threonine 1
ENSG00000149571	30.8469	64.7791	-1,56646304071176	7.22078e-08	KIRREL3	kin of IRRE like 3 (Drosophila)
ENSG00000153904	47.0512	107.496	-1,56685429448409	1.037e-10	DDAH1	dimethylarginine dimethylaminohydrolase 1
ENSG00000081377	9.90063	12.3283	-1,56732561524046	5.79613e-06	CDC14B	CDC14 cell division cycle 14 homolog B (S. cerevisiae)
ENSG00000124795	13.9309	39.5211	-1,56834065213534	6.33672e-08	DEK	DEK oncogene
ENSG00000137177	11.9325	35.5027	-1,56966187014080	9.29191e-10	KIF13A	kinesin family member 13A
ENSG00000196345	1.30112	4.90776	-1,57353239272292	0.0186078	ZNF167	zinc finger protein 167
ENSG00000146263	1.97648	5.17523	-1,57398639032639	0.00291631	MMS22L	MMS22-like, DNA repair protein
ENSG00000168575	38.1598	106.42	-1,57429729971626	1.47729e-10	SLC20A2	solute carrier family 20 (phosphate transporter), member 2
ENSG00000166073	50.4215	156.469	-1,57497990934191	1.26965e-10	GPR176	G protein-coupled receptor 176
ENSG00000101003	1.65621	4.2636	-1,58011835248665	0.0431505	GINS1	GINS complex subunit 1 (Psf1 homolog)
ENSG00000213722	28.7056	90.0319	-1,58068599527874	8.31251e-09	DDAH2	dimethylarginine dimethylaminohydrolase 2
ENSG00000136274	3.34065	8.87475	-1,58182169941166	1.12761e-05	NACAD	NAC alpha domain containing
ENSG00000132329	6.16227	18.8664	-1,58218288254485	0.00118988	RAMP1	receptor (G protein-coupled) activity modifying protein 1
ENSG00000221008	17.9636	62.2095	-1,58232647599972	0.0472978	AC136698.1
ENSG00000187676	1.35981	3.01891	-1,58334462730130	0.00315904	B3GALTL	beta 1,3-galactosyltransferase-like
ENSG00000106799	8.18249	22.5859	-1,58420458354483	4.50807e-09	TGFBR1	transforming growth factor, beta receptor 1
ENSG00000185634	2.18459	6.59001	-1,58591338892272	0.000121621	SHC4	SHC (Src homology 2 domain containing) family, member 4
ENSG00000144712	1.72889	5.7918	-1,58667367093244	5.56124e-05	CAND2	cullin-associated and neddylation-dissociated 2 (putative)
ENSG00000145604	5.29043	15.7682	-1,58773853398088	0.00033343	SKP2	S-phase kinase-associated protein 2 (p45)
ENSG00000116005	17.8607	49.5888	-1,59043847860799	5.6309e-10	PCYOX1	prenylcysteine oxidase 1
ENSG00000254851	9.29407	28.7778	-1,59118759018128	8.86115e-05	RP11-109L13.1
ENSG00000109686	3.79205	5.32905	-1,59204025835294	0.000557724	SH3D19	SH3 domain containing 19
ENSG00000159164	4.14516	12.9705	-1,59455277890653	1.38629e-07	SV2A	synaptic vesicle glycoprotein 2A
ENSG00000149218	3.9481	12.3921	-1,59526064353014	1.07557e-07	ENDOD1	endonuclease domain containing 1
ENSG00000164124	5.2186	10.1238	-1,59623108809305	0.0103413	TMEM144	transmembrane protein 144
ENSG00000119711	0.941281	2.93887	-1,59679947269132	0.0240304	ALDH6A1	aldehyde dehydrogenase 6 family, member A1
ENSG00000164292	49.277	141.754	-1,59754721424396	7.05913e-11	RHOBTB3	Rho-related BTB domain containing 3
ENSG00000174428	3.31816	9.48156	-1,59762121202548	0.00102282	GTF2IRD2B	GTF2I repeat domain containing 2B
ENSG00000244486	27.7894	83.5797	-1,59804275055826	1.77465e-10	SCARF2	scavenger receptor class F, member 2
ENSG00000128872	1.43791	3.73707	-1,59931971068311	1.39318e-05	TMOD2	tropomodulin 2 (neuronal)
ENSG00000080493	4.19392	11.7211	-1,60347603757311	6.21919e-07	SLC4A4	solute carrier family 4, sodium bicarbonate cotransporter, member 4
ENSG00000021826	1.60229	3.67286	-1,60490413523137	0.0138108	CPS1	carbamoyl-phosphate synthase 1, mitochondrial
ENSG00000148175	68.5115	208.979	-1,60491674237969	1.53659e-11	STOM	stomatin
ENSG00000200237	13.127	43.0321	-1,60515574364707	0.0358204	SNORA70.1	Small nucleolar RNA SNORA70
ENSG00000226752	1.59465	4.89125	-1,6095431934624	0.00939685	RP11-27I1.2
ENSG00000138688	6.91423	27.6554	-1,61039138103608	2.46301e-09	KIAA1109	KIAA1109
ENSG00000205560	3.76771	16.4193	-1,61066435708516	2.83165e-05	CPT1B	carnitine palmitoyltransferase 1B (muscle)
ENSG00000232561	7.57728	23.9592	-1,61148979573772	2.14723e-08	GTF2IP1	general transcription factor IIi, pseudogene 1
ENSG00000172935	20.6993	66.1016	-1,61970350637499	2.51967e-10	MRGPRF	MAS-related GPR, member F
ENSG00000164104	6.10898	21.0765	-1,62255090457365	8.44916e-05	HMGB2	high-mobility group box 2
ENSG00000233369	8.01546	25.5395	-1,62322789332753	1.29683e-08	RP11-396K3.1
ENSG00000106829	12.5443	40.4976	-1,62401651146741	4.03238e-08	TLE4	transducin-like enhancer of split 4 (E(sp1) homolog, Drosophila)
ENSG00000141068	3.56801	10.0581	-1,62793801241434	8.00759e-07	KSR1	kinase suppressor of ras 1
ENSG00000139211	6.22666	19.9076	-1,63166372441004	3.75352e-07	AMIGO2	adhesion molecule with Ig-like domain 2
ENSG00000154027	30.4714	91.3218	-1,63291282038943	1.23469e-08	AK5	adenylate kinase 5
ENSG00000130529	7.62983	24.3057	-1,63604704217439	1.97542e-09	TRPM4	transient receptor potential cation channel, subfamily M, member 4
ENSG00000232157	1.29523	4.0949	-1,63641266372209	0.00857917	RP1-187N21.2
ENSG00000145012	85.7024	75.9537	-1,63721296123933	2.19424e-11	LPP	LIM domain containing preferred translocation partner in lipoma
ENSG00000166347	28.563	96.9796	-1,63806931275047	3.56165e-07	CYB5A	cytochrome b5 type A (microsomal)
ENSG00000216042	129.045	428.154	-1,63807923027848	9.10656e-08	MIR922	microRNA 922
ENSG00000165304	2.17794	7.35345	-1,63908271009027	0.00127699	MELK	maternal embryonic leucine zipper kinase
ENSG00000178996	13.8888	43.323	-1,64206821563285	3.04411e-11	SNX18	sorting nexin 18
ENSG00000166341	6.08906	18.5541	-1,64226311823510	6.14299e-11	DCHS1	dachsous 1 (Drosophila)
ENSG00000150551	27.2068	82.8188	-1,64252730946042	1.00378e-10	LYPD1	LY6/PLAUR domain containing 1
ENSG00000108691	8.8096	30.0875	-1,64308843374059	2.95134e-05	CCL2	chemokine (C-C motif) ligand 2
ENSG00000207733	47.222	156.224	-1,64441393804013	0.000553065	MIR637	microRNA 637
ENSG00000145284	1.65186	4.99162	-1,64444836911565	0.00149107	SCD5	stearoyl-CoA desaturase 5
ENSG00000254771	17.1974	53.9492	-1,64718956406165	0.00495361	RP11-50B3.1
ENSG00000196275	3.11803	8.54655	-1,64917740851709	0.000854754	GTF2IRD2	GTF2I repeat domain containing 2
ENSG00000174080	6.7606	19.922	-1,65044921690209	0.000417512	CTSF	cathepsin F
ENSG00000163017	234.756	761.906	-1,65079313692189	2.61635e-10	ACTG2	actin, gamma 2, smooth muscle, enteric
ENSG00000162337	17.8558	50.0583	-1,65375732771841	3.06674e-10	LRP5	low density lipoprotein receptor-related protein 5
ENSG00000123684	10.1147	22.7699	-1,65405704079365	2.64688e-08	LPGAT1	lysophosphatidylglycerol acyltransferase 1
ENSG00000020577	6.77336	21.9235	-1,65452882174031	5.32926e-11	SAMD4A	sterile alpha motif domain containing 4A
ENSG00000101460	20.3502	70.1252	-1,65488791792121	5.83418e-08	MAP1LC3A	microtubule-associated protein 1 light chain 3 alpha
ENSG00000164930	17.5947	54.842	-1,65674691489017	3.81188e-11	FZD6	frizzled homolog 6 (Drosophila)
ENSG00000121039	27.3592	95.5841	-1,65836896933095	4.93154e-11	RDH10	retinol dehydrogenase 10 (all-trans)
ENSG00000117394	207.221	701.509	-1,66291924546049	7.15442e-09	SLC2A1	solute carrier family 2 (facilitated glucose transporter), member 1
ENSG00000150347	13.0814	40.5786	-1,66464587951027	5.2334e-12	ARID5B	AT rich interactive domain 5B (MRF1-like)
ENSG00000071282	7.75905	25.9866	-1,66516069975542	1.29705e-05	LMCD1	LIM and cysteine-rich domains 1
ENSG00000134013	490.248	1604.96	-1,66717433395417	5.64013e-07	LOXL2	lysyl oxidase-like 2
ENSG00000117791	1.95211	8.01672	-1,66909937500817	0.0280971	MOSC2	MOCO sulphurase C-terminal domain containing 2
ENSG00000174720	4.38837	17.5427	-1,67091466820627	0.0109642	LARP7	La ribonucleoprotein domain family, member 7
ENSG00000049323	190.277	709.865	-1,67152695205880	8.79429e-09	LTBP1	latent transforming growth factor beta binding protein 1
ENSG00000112419	17.4386	38.7567	-1,67247879758305	3.68346e-11	PHACTR2	phosphatase and actin regulator 2
ENSG00000152942	9.94004	18.9401	-1,67359994944771	2.36137e-06	RAD17	RAD17 homolog (S. pombe)
ENSG00000135502	3.42513	9.70772	-1,67532159614808	0.000111717	SLC26A10	solute carrier family 26, member 10
ENSG00000186448	2.26434	6.39412	-1,67568131505195	0.000224635	ZNF197	zinc finger protein 197
ENSG00000254122	2.63029	8.66562	-1,67868231552159	8.96589e-07	PCDHGB7	protocadherin gamma subfamily B, 7
ENSG00000049089	3.71419	5.42474	-1,67917891814191	0.0148294	COL9A2	collagen, type IX, alpha 2
ENSG00000144031	1.26879	4.14081	-1,68011040878321	0.042413	ANKRD53	ankyrin repeat domain 53
ENSG00000164291	5.74972	17.6842	-1,68065112249450	1.60166e-06	ARSK	arylsulfatase family, member K
ENSG00000198121	57.9874	190.422	-1,68116654042068	3.695e-12	LPAR1	lysophosphatidic acid receptor 1
ENSG00000155893	0.979517	5.28489	-1,68383671201139	0.0265375	ACPL2	acid phosphatase-like 2
ENSG00000112029	0.989864	3.32324	-1,68491113425744	0.015375	FBXO5	F-box protein 5
ENSG00000112902	16.0937	28.191	-1,68530802527612	2.71117e-11	SEMA5A	sema domain, seven thrombospondin repeats (type 1 and type 1-like), transmembrane domain (TM) and short cytoplasmic domain, (semaphorin) 5A
ENSG00000042062	23.4004	89.3157	-1,68612230414939	2.87965e-12	FAM65C	family with sequence similarity 65, member C
ENSG00000166352	2.04633	8.64825	-1,68704573939775	0.0233745	C11orf74	chromosome 11 open reading frame 74
ENSG00000136048	10.8985	36.0365	-1,68785233749395	4.76844e-11	DRAM1	DNA-damage regulated autophagy modulator 1
ENSG00000255390	3.08034	10.6976	-1,69114064210225	0.00579161	RP11-732A19.5
ENSG00000132669	27.1562	85.3497	-1,69276095917932	7.41024e-12	RIN2	Ras and Rab interactor 2
ENSG00000139793	7.22399	30.3752	-1,69367248592854	1.40882e-09	MBNL2	muscleblind-like 2 (Drosophila)
ENSG00000083290	1.70829	5.65354	-1,69433651418074	1.69031e-05	ULK2	unc-51-like kinase 2 (C. elegans)
ENSG00000112183	6.23869	19.3628	-1,69661699256341	2.33643e-05	RBM24	RNA binding motif protein 24
ENSG00000214018	1.57407	5.39899	-1,69706647779852	0.0199693	RRM2P3	ribonucleotide reductase M2 polypeptide pseudogene 3
ENSG00000086991	1.16787	3.45612	-1,69945890175592	0.00358623	NOX4	NADPH oxidase 4
ENSG00000105808	13.9873	48.142	-1,69979253790379	1.4314e-06	RASA4	RAS p21 protein activator 4
ENSG00000255090	8.03989	42.1474	-1,70035561615782	0.00821342	RP11-820L6.1
ENSG00000146670	4.50428	11.2868	-1,70038806671710	0.000507436	CDCA5	cell division cycle associated 5
ENSG00000188153	6.93649	22.5883	-1,70108915810991	7.19783e-09	COL4A5	collagen, type IV, alpha 5
ENSG00000140937	18.5641	83.7553	-1,70357489763202	8.13935e-12	CDH11	cadherin 11, type 2, OB-cadherin (osteoblast)
ENSG00000140386	0.738369	2.42432	-1,70497719669424	0.00184117	SCAPER	S-phase cyclin A-associated protein in the ER
ENSG00000106484	11.2927	22.3464	-1,70687391009448	5.57988e-06	MEST	mesoderm specific transcript homolog (mouse)
ENSG00000140396	5.26292	14.6833	-1,70696405855959	2.75124e-07	NCOA2	nuclear receptor coactivator 2
ENSG00000096696	2.81344	8.87833	-1,71384285233694	1.87566e-09	DSP	desmoplakin
ENSG00000118412	1.20488	2.84372	-1,71454344507994	0.00196976	CASP8AP2	caspase 8 associated protein 2
ENSG00000169432	2.90791	8.46986	-1,71460880165981	4.71907e-09	SCN9A	sodium channel, voltage-gated, type IX, alpha subunit
ENSG00000155816	8.82443	20.4419	-1,71658718257633	5.48292e-08	FMN2	formin 2
ENSG00000142798	55.5491	157.736	-1,71699243562198	1.27497e-10	HSPG2	heparan sulfate proteoglycan 2
ENSG00000164649	2.09571	7.33395	-1,72127007206915	0.00539252	CDCA7L	cell division cycle associated 7-like
ENSG00000084636	75.3855	226.963	-1,72400988189258	2.7445e-12	COL16A1	collagen, type XVI, alpha 1
ENSG00000079102	3.95038	13.0769	-1,72525860338452	0.0056159	RUNX1T1	runt-related transcription factor 1; translocated to, 1 (cyclin D-related)
ENSG00000152422	0.841028	2.98056	-1,73128865326454	0.0449482	XRCC4	X-ray repair complementing defective repair in Chinese hamster cells 4
ENSG00000095539	3.07344	10.8632	-1,73250562330486	0.000313719	SEMA4G	sema domain, immunoglobulin domain (Ig), transmembrane domain (TM) and short cytoplasmic domain, (semaphorin) 4G
ENSG00000137752	9.03694	39.199	-1,73302864522373	1.36959e-05	CASP1	caspase 1, apoptosis-related cysteine peptidase (interleukin 1, beta, convertase)
ENSG00000166532	1.55216	7.39455	-1,73324378715274	0.000488688	RIMKLB	ribosomal modification protein rimK-like family member B
ENSG00000148677	1.43094	4.90215	-1,73385717331052	0.003406	ANKRD1	ankyrin repeat domain 1 (cardiac muscle)
ENSG00000181513	1.27638	4.58704	-1,73769130975021	0.0049057	ACBD4	acyl-CoA binding domain containing 4
ENSG00000237036	3.5917	13.8955	-1,74056432255811	0.0136662	RP11-192P3.1
ENSG00000152804	2.13717	7.6109	-1,7434586699625	0.00144902	HHEX	hematopoietically expressed homeobox
ENSG00000229807	16.0396	39.2585	-1,74347490259212	3.20063e-12	XIST	X (inactive)-specific transcript (non-protein coding)
ENSG00000151067	1.12369	3.84483	-1,74514188306892	1.18978e-05	CACNA1C	calcium channel, voltage-dependent, L type, alpha 1C subunit
ENSG00000132640	18.718	82.8246	-1,74833159042363	4.00553e-12	BTBD3	BTB (POZ) domain containing 3
ENSG00000074181	15.7602	53.7509	-1,74977563460305	7.373e-12	NOTCH3	notch 3
ENSG00000238757	106.78	372.537	-1,75021558854798	1.1251e-07	AL031431.1
ENSG00000072195	25.1648	69.4001	-1,75052595835504	2.21757e-10	SPEG	SPEG complex locus
ENSG00000142892	5.29722	16.7326	-1,75150531981732	4.60926e-06	PIGK	phosphatidylinositol glycan anchor biosynthesis, class K
ENSG00000177707	27.1113	87.9981	-1,7517774493285	1.38271e-11	PVRL3	poliovirus receptor-related 3
ENSG00000138738	1.40429	5.77998	-1,75629259774300	0.00907373	PRDM5	PR domain containing 5
ENSG00000207650	23.0493	77.0847	-1,75909658701145	0.0069492	MIR570	microRNA 570
ENSG00000179750	0.857212	3.26558	-1,75927468265720	0.0302791	APOBEC3B	apolipoprotein B mRNA editing enzyme, catalytic polypeptide-like 3B
ENSG00000083720	8.80525	28.7624	-1,76001147678153	8.6329e-06	OXCT1	3-oxoacid CoA transferase 1
ENSG00000056998	4.13236	14.8272	-1,76109891305614	1.26647e-05	GYG2	glycogenin 2
ENSG00000135835	1.92271	7.53079	-1,76133408986671	0.000164051	KIAA1614	KIAA1614
ENSG00000189337	5.12616	17.0336	-1,76406521902390	1.54171e-07	KAZN	kazrin, periplakin interacting protein
ENSG00000255248	23.5005	86.0817	-1,76873494599845	6.9955e-12	RP11-166D19.1
ENSG00000163815	7.46103	24.9692	-1,76888754974896	5.68542e-05	CLEC3B	C-type lectin domain family 3, member B
ENSG00000009413	1.69208	7.75293	-1,77268247360191	6.45374e-09	REV3L	REV3-like, catalytic subunit of DNA polymerase zeta (yeast)
ENSG00000088881	1.15016	3.3195	-1,77310008898636	0.0440172	EBF4	early B-cell factor 4
ENSG00000083123	4.34427	16.3882	-1,77679514745068	0.000490411	BCKDHB	branched chain keto acid dehydrogenase E1, beta polypeptide
ENSG00000245958	18.3847	76.0299	-1,77778658826689	2.95761e-07	RP11-33B1.1
ENSG00000234555	3.22397	11.4127	-1,77803758616497	0.0171372	RP11-74C13.4
ENSG00000116117	3.8445	10.6987	-1,77949847411486	2.41795e-07	PARD3B	par-3 partitioning defective 3 homolog B (C. elegans)
ENSG00000142945	6.89274	15.753	-1,78023908278339	2.08758e-06	KIF2C	kinesin family member 2C
ENSG00000196814	1.34281	4.42311	-1,78050050974955	0.00127413	FAM125B	family with sequence similarity 125, member B
ENSG00000256309	4.08341	14.4808	-1,78083584573047	2.6488e-05	AC009469.1
ENSG00000113083	117.506	412.154	-1,78190158417709	2.26057e-12	LOX	lysyl oxidase
ENSG00000229694	2.5619	11.5466	-1,78208086749812	0.0352894	RP11-305L7.6
ENSG00000172638	348.351	1247.94	-1,78210943428337	3.12049e-11	EFEMP2	EGF containing fibulin-like extracellular matrix protein 2
ENSG00000070404	24.4716	88.0851	-1,78261891969831	1.43968e-12	FSTL3	follistatin-like 3 (secreted glycoprotein)
ENSG00000069011	17.1115	61.7225	-1,79080334961734	4.93154e-11	PITX1	paired-like homeodomain 1
ENSG00000235863	0.953013	3.51359	-1,79098608640215	0.0162218	B3GALT4	UDP-Gal:betaGlcNAc beta 1,3-galactosyltransferase, polypeptide 4
ENSG00000253910	0.821252	2.88086	-1,79408568590683	0.000509313	PCDHGB2	protocadherin gamma subfamily B, 2
ENSG00000115163	2.5692	9.42936	-1,79427590761850	0.000564926	CENPA	centromere protein A
ENSG00000162607	1.55718	5.06211	-1,79441563704524	0.000148379	USP1	ubiquitin specific peptidase 1
ENSG00000173406	0.952657	5.04537	-1,79489039646962	0.00792168	DAB1	disabled homolog 1 (Drosophila)
ENSG00000120885	103.058	390.152	-1,79619212991841	2.18783e-13	CLU	clusterin
ENSG00000173531	1.78636	6.52157	-1,79638635240791	0.016239	MST1	macrophage stimulating 1 (hepatocyte growth factor-like)
ENSG00000236654	14.2075	51.7585	-1,79783397114437	0.00121184	AC079780.3
ENSG00000176868	3.27183	11.6449	-1,79815169294225	0.00297023	AL358781.1
ENSG00000102384	0.623393	3.03479	-1,80498899581989	0.0221707	CENPI	centromere protein I
ENSG00000165572	1.26918	4.54073	-1,80542378010581	0.000158977	KBTBD6	kelch repeat and BTB (POZ) domain containing 6
ENSG00000088280	5.14243	22.0188	-1,80978242513717	7.0059e-07	ASAP3	ArfGAP with SH3 domain, ankyrin repeat and PH domain 3
ENSG00000095303	69.0005	229.694	-1,81370302017118	4.72085e-13	PTGS1	prostaglandin-endoperoxide synthase 1 (prostaglandin G/H synthase and cyclooxygenase)
ENSG00000129353	25.9158	95.8228	-1,81537317335757	1.59148e-13	SLC44A2	solute carrier family 44, member 2
ENSG00000130635	43.9462	154.948	-1,81798002949915	5.82366e-13	COL5A1	collagen, type V, alpha 1
ENSG00000105519	1.57348	5.62666	-1,82181376432276	0.00145568	CAPS	calcyphosine
ENSG00000119138	1.41438	5.22399	-1,82448003115877	2.43758e-06	KLF9	Kruppel-like factor 9
ENSG00000004776	67.7877	248.701	-1,82704473455024	3.49488e-13	HSPB6	heat shock protein, alpha-crystallin-related, B6
ENSG00000087842	1.2972	4.58496	-1,82907562395248	0.024845	PIR	pirin (iron-binding nuclear protein)
ENSG00000238244	2.24584	8.49581	-1,83303147982282	0.0001176	GABARAPL3	GABA(A) receptors associated protein like 3, pseudogene
ENSG00000139112	65.8673	265.836	-1,83573152506503	5.45305e-14	GABARAPL1	GABA(A) receptor-associated protein like 1
ENSG00000002745	21.5242	78.0987	-1,83713141430076	2.35384e-12	WNT16	wingless-type MMTV integration site family, member 16
ENSG00000089472	2.84027	13.5404	-1,83818418372945	5.69598e-07	HEPH	hephaestin
ENSG00000127241	3.79472	13.562	-1,84207712118709	3.73228e-05	MASP1	mannan-binding lectin serine peptidase 1 (C4/C2 activating component of Ra-reactive factor)
ENSG00000102893	2.49322	9.3072	-1,84353528813922	4.14418e-09	PHKB	phosphorylase kinase, beta
ENSG00000163430	274.647	978.419	-1,84617958753974	2.71965e-10	FSTL1	follistatin-like 1
ENSG00000204314	1.68625	7.7056	-1,84712023588994	0.0134528	PRRT1	proline-rich transmembrane protein 1
ENSG00000145020	2.10669	9.05173	-1,85437069792454	0.00113292	AMT	aminomethyltransferase
ENSG00000112144	0.995671	3.66974	-1,85527555547736	1.02128e-05	ICK	intestinal cell (MAK-like) kinase
ENSG00000013810	8.59024	29.8926	-1,8560776458607	9.55783e-07	TACC3	transforming, acidic coiled-coil containing protein 3
ENSG00000236051	17.1979	65.1651	-1,85691105271875	1.68556e-05	RP11-226E21.3
ENSG00000115183	2.83279	10.186	-1,85978156158922	1.05213e-10	TANC1	tetratricopeptide repeat, ankyrin repeat and coiled-coil containing 1
ENSG00000091656	11.0225	23.4188	-1,85984058123692	5.05276e-07	ZFHX4	zinc finger homeobox 4
ENSG00000082512	1.75794	7.04407	-1,86167944770554	4.62951e-05	TRAF5	TNF receptor-associated factor 5
ENSG00000077684	11.2028	15.9989	-1,86331635539687	3.03376e-08	PHF17	PHD finger protein 17
ENSG00000099864	0.768391	2.77133	-1,86513711983544	0.00631943	PALM	paralemmin
ENSG00000173482	6.01011	22.1962	-1,8656531556128	4.89454e-12	PTPRM	protein tyrosine phosphatase, receptor type, M
ENSG00000186567	1.17332	4.34509	-1,86697131813215	0.00316688	CEACAM19	carcinoembryonic antigen-related cell adhesion molecule 19
ENSG00000150764	4.49601	9.32408	-1,86784737109473	2.11415e-08	DIXDC1	DIX domain containing 1
ENSG00000170801	3.63477	13.3665	-1,86879043266386	2.86255e-07	HTRA3	HtrA serine peptidase 3
ENSG00000134247	2.41756	8.26888	-1,86884123745874	1.96851e-08	PTGFRN	prostaglandin F2 receptor negative regulator
ENSG00000047410	9.27461	34.7264	-1,87286966125244	2.12407e-10	TPR	translocated promoter region (to activated MET oncogene)
ENSG00000176435	1.92082	7.88168	-1,87296229869331	0.00155924	CLEC14A	C-type lectin domain family 14, member A
ENSG00000169439	22.891	83.6553	-1,87336654646825	8.46672e-11	SDC2	syndecan 2
ENSG00000122035	2.26994	8.63486	-1,87458375980994	0.017998	RASL11A	RAS-like, family 11, member A
ENSG00000004777	0.595264	2.17208	-1,87733879456037	0.0028357	ARHGAP33	Rho GTPase activating protein 33
ENSG00000139200	5.34946	17.7089	-1,88321883358366	1.45972e-05	C12orf53	chromosome 12 open reading frame 53
ENSG00000094804	1.88465	4.43083	-1,88681044027549	0.000927565	CDC6	cell division cycle 6 homolog (S. cerevisiae)
ENSG00000235471	1.29464	4.87636	-1,88785812876083	0.000513385	AL033532.1
ENSG00000107679	2.10238	10.6185	-1,88834208304037	4.73669e-06	PLEKHA1	pleckstrin homology domain containing, family A (phosphoinositide binding specific) member 1
ENSG00000090006	18.5186	64.3755	-1,88909270736879	1.11154e-13	LTBP4	latent transforming growth factor beta binding protein 4
ENSG00000128791	18.7895	71.2245	-1,88910020689123	1.71518e-14	TWSG1	twisted gastrulation homolog 1 (Drosophila)
ENSG00000166510	4.4936	16.9356	-1,88965001289408	9.14865e-11	CCDC68	coiled-coil domain containing 68
ENSG00000166402	1.61727	5.67635	-1,89299361554091	1.67906e-06	TUB	tubby homolog (mouse)
ENSG00000214544	0.860951	3.0584	-1,89873808890431	0.00860733	GTF2IRD2P1	GTF2I repeat domain containing 2 pseudogene 1
ENSG00000129422	0.320339	5.81896	-1,89877388446787	0.0287361	MTUS1	microtubule associated tumor suppressor 1
ENSG00000135473	1.5315	5.72342	-1,89896939357035	1.41839e-06	PAN2	PAN2 poly(A) specific ribonuclease subunit homolog (S. cerevisiae)
ENSG00000202042	160.67	615.531	-1,89944889006169	1.10307e-10	SNORD49B	small nucleolar RNA, C/D box 49B
ENSG00000174738	4.45054	17.8031	-1,90184965711800	4.94066e-08	NR1D2	nuclear receptor subfamily 1, group D, member 2
ENSG00000182568	2.59055	14.63	-1,90277633064812	0.000179327	SATB1	SATB homeobox 1
ENSG00000160094	4.43208	19.8086	-1,90397639449015	3.30255e-06	ZNF362	zinc finger protein 362
ENSG00000104218	2.97173	10.5934	-1,91092261599650	4.74825e-07	CSPP1	centrosome and spindle pole associated protein 1
ENSG00000176018	1.99036	8.55913	-1,91153326197412	0.000270559	LYSMD3	LysM, putative peptidoglycan-binding, domain containing 3
ENSG00000175745	30.2113	109.186	-1,91256832090475	1.27652e-12	NR2F1	nuclear receptor subfamily 2, group F, member 1
ENSG00000081853	3.95569	14.2039	-1,91334186853789	2.22523e-08	PCDHG@	protocadherin gamma cluster
ENSG00000133687	13.9209	49.1933	-1,91678407234874	5.97e-14	TMTC1	transmembrane and tetratricopeptide repeat containing 1
ENSG00000162512	35.3	124.789	-1,91842575281752	2.67321e-14	SDC3	syndecan 3
ENSG00000076382	1.13249	4.67206	-1,91854771617459	8.4413e-05	SPAG5	sperm associated antigen 5
ENSG00000172167	3.72934	9.31855	-1,91868170526252	0.00781154	MTBP	Mdm2, transformed 3T3 cell double minute 2, p53 binding protein (mouse) binding protein, 104kDa
ENSG00000105974	203.285	783.072	-1,92191181393164	4.50697e-13	CAV1	caveolin 1, caveolae protein, 22kDa
ENSG00000188167	0.669978	2.60884	-1,92526698879110	0.00100444	TMPPE	transmembrane protein with metallophosphoesterase domain
ENSG00000197093	7.96336	30.7422	-1,92688087695911	2.42072e-08	GAL3ST4	galactose-3-O-sulfotransferase 4
ENSG00000121716	2.8017	14.1092	-1,92786567024524	6.96413e-05	PILRB	paired immunoglobin-like type 2 receptor beta
ENSG00000254109	2.10298	8.61829	-1,92893722920189	0.00478984	CTD-3107M8.4
ENSG00000135480	1.21976	4.8042	-1,93019867703399	0.00281139	KRT7	keratin 7
ENSG00000159259	0.904857	3.36564	-1,93195703774203	0.0101557	CHAF1B	chromatin assembly factor 1, subunit B (p60)
ENSG00000213398	3.52496	13.5696	-1,93315314226191	2.04989e-06	LCAT	lecithin-cholesterol acyltransferase
ENSG00000231007	1.30831	5.23603	-1,93472224633844	0.00458651	CDC20P1	cell division cycle 20 homolog (S. cerevisiae) pseudogene 1
ENSG00000235261	2.14869	8.55999	-1,93488524407563	0.00972817	RP11-949J7.5
ENSG00000126778	4.20101	16.8333	-1,93533425415539	3.13433e-09	SIX1	SIX homeobox 1
ENSG00000134986	15.7566	59.8996	-1,93542138997473	4.11476e-11	C5orf13	chromosome 5 open reading frame 13
ENSG00000049246	0.956565	3.02884	-1,93547652242355	0.000579463	PER3	period homolog 3 (Drosophila)
ENSG00000172986	1.8722	7.03509	-1,93855391095479	0.00123037	GXYLT2	glucoside xylosyltransferase 2
ENSG00000115594	14.2118	46.3058	-1,94212271099804	5.05346e-14	IL1R1	interleukin 1 receptor, type I
ENSG00000152527	2.26841	5.21598	-1,94288060760097	0.000159017	PLEKHH2	pleckstrin homology domain containing, family H (with MyTH4 domain) member 2
ENSG00000122862	2.34423	9.57215	-1,94360228448607	0.000552417	SRGN	serglycin
ENSG00000176890	13.0249	49.7736	-1,94379559205300	3.00889e-09	TYMS	thymidylate synthetase
ENSG00000185565	0.8234	4.04529	-1,94839460723827	0.0404687	LSAMP	limbic system-associated membrane protein
ENSG00000146674	168.74	730.307	-1,94857270039960	3.91208e-12	IGFBP3	insulin-like growth factor binding protein 3
ENSG00000223298	15.613	62.8637	-1,95275801112697	0.00404269	Y_RNA.735	Y RNA
ENSG00000170542	0.660282	2.65115	-1,95303477101313	0.000586695	SERPINB9	serpin peptidase inhibitor, clade B (ovalbumin), member 9
ENSG00000227001	1.73873	7.08861	-1,95411408540878	0.0170475	RP11-293F5.2
ENSG00000120820	3.02681	12.1067	-1,95858137610506	2.68075e-06	GLT8D2	glycosyltransferase 8 domain containing 2
ENSG00000251562	16.8087	66.2545	-1,96133017586239	1.83255e-15	MALAT1	metastasis associated lung adenocarcinoma transcript 1 (non-protein coding)
ENSG00000174099	33.9973	103.423	-1,96159103899908	4.26954e-14	MSRB3	methionine sulfoxide reductase B3
ENSG00000149451	12.0791	43.5765	-1,96363463188463	2.16798e-12	ADAM33	ADAM metallopeptidase domain 33
ENSG00000178202	8.31325	29.9606	-1,96825386123793	1.29996e-10	KDELC2	KDEL (Lys-Asp-Glu-Leu) containing 2
ENSG00000172954	7.28541	12.5858	-1,96839721302497	2.80859e-07	LCLAT1	lysocardiolipin acyltransferase 1
ENSG00000184304	3.3385	11.7907	-1,96865680007329	1.29483e-07	PRKD1	protein kinase D1
ENSG00000253537	1.29768	5.22037	-1,96953425307769	1.02651e-06	PCDHGA7	protocadherin gamma subfamily A, 7
ENSG00000165633	2.25349	8.92964	-1,96983339422601	5.77854e-06	C10orf72	chromosome 10 open reading frame 72
ENSG00000169604	61.511	190.486	-1,97289220620297	3.70928e-15	ANTXR1	anthrax toxin receptor 1
ENSG00000151849	1.12122	5.85516	-1,97422000336743	0.000608047	CENPJ	centromere protein J
ENSG00000079819	20.1881	92.5975	-1,97447680347955	6.7568e-15	EPB41L2	erythrocyte membrane protein band 4.1-like 2
ENSG00000076003	2.34602	8.61751	-1,97582681060099	2.24859e-05	MCM6	minichromosome maintenance complex component 6
ENSG00000183691	5.19014	20.821	-1,97794915244040	1.45314e-08	NOG	noggin
ENSG00000063660	92.3418	356.406	-1,97942484713200	4.99687e-14	GPC1	glypican 1
ENSG00000228903	1.87547	7.00798	-1,98058068215434	0.00054146	AC004985.13
ENSG00000108840	8.14325	33.4432	-1,98623480628558	1.017e-14	HDAC5	histone deacetylase 5
ENSG00000136425	0.843865	3.51537	-1,98676596912154	0.0103506	CIB2	calcium and integrin binding family member 2
ENSG00000242001	102.995	414.264	-1,98745554667334	2.65783e-10	GS1-388B5.1
ENSG00000168497	3.09894	12.5516	-1,98992745205230	9.06657e-09	SDPR	serum deprivation response
ENSG00000118473	24.838	68.4974	-1,99347592475421	1.0999e-13	SGIP1	SH3-domain GRB2-like (endophilin) interacting protein 1
ENSG00000183722	13.3422	51.8626	-1,99556664431849	6.33172e-13	LHFP	lipoma HMGIC fusion partner
ENSG00000187800	15.7196	59.3066	-1,99589567693549	3.45855e-14	PEAR1	platelet endothelial aggregation receptor 1
ENSG00000110900	0.762274	2.83696	-1,99623516912453	0.0112977	TSPAN11	tetraspanin 11
ENSG00000178999	2.1938	9.21504	-1,99704618523364	0.000728173	AURKB	aurora kinase B
ENSG00000091986	37.7008	155.893	-2,00356020015884	1.40844e-15	CCDC80	coiled-coil domain containing 80
ENSG00000242498	1.49336	6.1222	-2,00389264509756	2.64707e-05	C15orf38	chromosome 15 open reading frame 38
ENSG00000145861	0.684662	2.87141	-2,0057123199721	0.00417331	C1QTNF2	C1q and tumor necrosis factor related protein 2
ENSG00000117399	4.43921	21.899	-2,00752236862711	4.30779e-06	CDC20	cell division cycle 20 homolog (S. cerevisiae)
ENSG00000104936	15.903	71.4607	-2,00816078830152	1.92702e-14	DMPK	dystrophia myotonica-protein kinase
ENSG00000142102	3.37908	13.454	-2,00830762370486	5.58286e-07	ATHL1	ATH1, acid trehalase-like 1 (yeast)
ENSG00000170153	1.06467	4.19084	-2,01645165186014	0.00105941	RNF150	ring finger protein 150
ENSG00000010626	3.04949	11.6727	-2,01656115460623	0.000101567	LRRC23	leucine rich repeat containing 23
ENSG00000146426	1.18889	6.1915	-2,01748860407554	0.000658937	TIAM2	T-cell lymphoma invasion and metastasis 2
ENSG00000001461	22.4267	78.0526	-2,01778176241673	2.36209e-15	NIPAL3	NIPA-like domain containing 3
ENSG00000128602	1.17732	4.81083	-2,01824629858835	0.000551328	SMO	smoothened homolog (Drosophila)
ENSG00000198919	1.41208	5.15093	-2,01917304390269	0.000794099	DZIP3	DAZ interacting protein 3, zinc finger
ENSG00000213416	0.742707	3.05441	-2,02118032160775	0.0459174	KRTAP4-12	keratin associated protein 4-12
ENSG00000168453	1.87787	5.22035	-2,02981961605973	0.00070944	HR	hairless homolog (mouse)
[truncated: 412 more rows]

## Sheet: Feuil2
Ensembl gene id	moyenne ras RPKM	moyenne vide RPKM	log2(Ras/Vide)	Adjusted p-value	Gene name	Description
ENSG00000197603	5.43477	14.8224	-1,00057675634532	0.022491	C5orf42	chromosome 5 open reading frame 42
ENSG00000075420	66.7384	115.788	-1,00076813930050	2.20792e-05	FNDC3B	fibronectin type III domain containing 3B
ENSG00000221366	135.522	281.765	-1,00163735044104	0.00667659	MIR1306	microRNA 1306
ENSG00000168970	3.01444	6.87572	-1,00300841440750	0.0439148	JMJD7-PLA2G4B	JMJD7-PLA2G4B readthrough
ENSG00000151612	8.77775	16.2795	-1,00307217577046	0.00393504	ZNF827	zinc finger protein 827
ENSG00000135862	222.886	382.656	-1,0041096296643	0.000204519	LAMC1	laminin, gamma 1 (formerly LAMB2)
ENSG00000124177	5.61204	7.58485	-1,00444941219513	0.00156492	CHD6	chromodomain helicase DNA binding protein 6
ENSG00000055211	13.0548	27.2758	-1,00472815951398	0.00178045	C6orf72	chromosome 6 open reading frame 72
ENSG00000135679	66.4382	146.111	-1,00503999203206	2.12415e-05	MDM2	Mdm2 p53 binding protein homolog (mouse)
ENSG00000085276	4.29356	7.76375	-1,00516886544926	0.0460328	MECOM	MDS1 and EVI1 complex locus
ENSG00000173918	17.4069	36.882	-1,00609996230623	8.04117e-05	C1QTNF1	C1q and tumor necrosis factor related protein 1
ENSG00000169213	54.942	81.6641	-1,00726516158903	4.07698e-05	RAB3B	RAB3B, member RAS oncogene family
ENSG00000207783	151.803	308.204	-1,00895166160077	0.0167071	MIR564	microRNA 564
ENSG00000109099	17.9029	36.2629	-1,01011710708848	0.00105399	PMP22	peripheral myelin protein 22
ENSG00000137193	6.8862	12.5812	-1,01084123129215	0.0263235	PIM1	pim-1 oncogene
ENSG00000183873	2.50058	4.24299	-1,01104762370018	0.0258577	SCN5A	sodium channel, voltage-gated, type V, alpha subunit
ENSG00000170498	18.3736	39.3455	-1,01255944849369	0.00734604	KISS1	KiSS-1 metastasis-suppressor
ENSG00000140044	5.72186	12.3285	-1,01268167061453	0.000858717	JDP2	Jun dimerization protein 2
ENSG00000114251	126.972	253.63	-1,01268758648021	2.27757e-05	WNT5A	wingless-type MMTV integration site family, member 5A
ENSG00000117620	4.73388	10.1712	-1,01405375702628	0.0277877	SLC35A3	solute carrier family 35 (UDP-N-acetylglucosamine (UDP-GlcNAc) transporter), member A3
ENSG00000246763	5.81892	13.5771	-1,01456790922512	0.029277	CTC-463N11.3
ENSG00000014123	2.54858	5.12065	-1,01712135991764	0.0187614	KIAA0776	KIAA0776
ENSG00000151553	10.4312	18.0073	-1,01869475487912	0.00127629	FAM160B1	family with sequence similarity 160, member B1
ENSG00000139350	1.96659	4.09642	-1,01953864002418	0.0326112	NEDD1	neural precursor cell expressed, developmentally down-regulated 1
ENSG00000131470	7.23147	14.6651	-1,02030454906121	0.0156358	PSMC3IP	PSMC3 interacting protein
ENSG00000183354	3.40509	5.74973	-1,02155784867903	0.0118868	KIAA2026	KIAA2026
ENSG00000183723	1.38359	2.79119	-1,02198871516065	0.013581	CMTM4	CKLF-like MARVEL transmembrane domain containing 4
ENSG00000123737	10.595	24.569	-1,02199604791744	0.00600602	EXOSC9	exosome component 9
ENSG00000156052	11.9547	22.1148	-1,02220613527580	0.000529872	GNAQ	guanine nucleotide binding protein (G protein), q polypeptide
ENSG00000164040	17.4269	84.8002	-1,02304402393695	2.50735e-05	PGRMC2	progesterone receptor membrane component 2
ENSG00000035862	316.149	605.574	-1,02460470029232	0.000700839	TIMP2	TIMP metallopeptidase inhibitor 2
ENSG00000072415	3.7857	7.96846	-1,02488556764017	0.00126582	MPP5	membrane protein, palmitoylated 5 (MAGUK p55 subfamily member 5)
ENSG00000154736	1.52449	3.11199	-1,02542184421714	0.00617322	ADAMTS5	ADAM metallopeptidase with thrombospondin type 1 motif, 5
ENSG00000122870	6.05532	12.3278	-1,02595379329222	0.000228477	BICC1	bicaudal C homolog 1 (Drosophila)
ENSG00000140743	9.80762	20.6116	-1,02624935482721	0.000366139	CDR2	cerebellar degeneration-related protein 2, 62kDa
ENSG00000065308	24.2383	50.2861	-1,02631175176706	1.62433e-05	TRAM2	translocation associated membrane protein 2
ENSG00000156802	2.57097	4.91977	-1,02671764542494	0.0199625	ATAD2	ATPase family, AAA domain containing 2
ENSG00000120256	62.4302	106.681	-1,02734723780563	4.32679e-05	LRP11	low density lipoprotein receptor-related protein 11
ENSG00000144283	10.9633	28.643	-1,02838758704474	0.0018696	PKP4	plakophilin 4
ENSG00000197702	177.706	355.346	-1,02940358943963	1.17672e-05	PARVA	parvin, alpha
ENSG00000187091	17.048	34.7047	-1,02950695044131	0.00182752	PLCD1	phospholipase C, delta 1
ENSG00000240303	11.5335	22.4934	-1,03118520260777	0.000720922	ACAD11	acyl-CoA dehydrogenase family, member 11
ENSG00000163703	31.2675	67.0361	-1,03119475763925	0.000141012	CRELD1	cysteine-rich with EGF-like domains 1
ENSG00000236360	14.8362	31.1904	-1,03189531772390	0.0455519	RP11-334A14.2
ENSG00000127946	14.1127	24.4152	-1,03192764009894	4.62951e-05	HIP1	huntingtin interacting protein 1
ENSG00000014914	5.92918	13.7298	-1,03196382416921	0.00942266	MTMR11	myotubularin related protein 11
ENSG00000197852	4.93114	7.92051	-1,03317719854079	0.0147454	C1orf183	chromosome 1 open reading frame 183
ENSG00000145545	15.1461	29.7043	-1,03489158998107	0.00397266	SRD5A1	steroid-5-alpha-reductase, alpha polypeptide 1 (3-oxo-5 alpha-steroid delta 4-dehydrogenase alpha 1)
ENSG00000183496	2.30878	4.89053	-1,03539537462599	0.0250382	MEX3B	mex-3 homolog B (C. elegans)
ENSG00000103174	3.71058	7.77327	-1,03558067682652	0.0238747	NAGPA	N-acetylglucosamine-1-phosphodiester alpha-N-acetylglucosaminidase
ENSG00000132793	4.31268	8.90415	-1,03622134132694	0.0172435	LPIN3	lipin 3
ENSG00000185189	16.7046	35.436	-1,03876603461330	0.000101084	NRBP2	nuclear receptor binding protein 2
ENSG00000186918	16.1624	35.6672	-1,03901585782465	0.00028737	ZNF395	zinc finger protein 395
ENSG00000198586	4.6406	9.51918	-1,03970448768074	0.00294393	TLK1	tousled-like kinase 1
ENSG00000134138	2.94809	6.1966	-1,03994322267763	0.0143849	MEIS2	Meis homeobox 2
ENSG00000138744	20.0709	44.4776	-1,03996008471776	0.00297013	NAAA	N-acylethanolamine acid amidase
ENSG00000112697	133.444	277.428	-1,04059440086255	1.65106e-05	TMEM30A	transmembrane protein 30A
ENSG00000162430	56.6153	122.49	-1,04199470305608	1.57323e-05	SEPN1	selenoprotein N, 1
ENSG00000198162	19.4858	37.7311	-1,04297843919413	6.36467e-05	MAN1A2	mannosidase, alpha, class 1A, member 2
ENSG00000074657	6.68743	14.0533	-1,04341969751972	5.96418e-05	ZNF532	zinc finger protein 532
ENSG00000032219	4.33269	8.99029	-1,04462798447387	0.0382163	ARID4A	AT rich interactive domain 4A (RBP1-like)
ENSG00000185761	8.4265	17.7793	-1,04467212527356	0.00194575	ADAMTSL5	ADAMTS-like 5
ENSG00000187741	4.30139	5.66377	-1,04581497795612	0.0280278	FANCA	Fanconi anemia, complementation group A
ENSG00000096092	6.54039	14.1105	-1,04719683707308	0.0370072	TMEM14A	transmembrane protein 14A
ENSG00000111727	4.15264	8.18955	-1,04778121621524	0.00566295	HCFC2	host cell factor C2
ENSG00000198795	4.47485	9.47796	-1,04952758141157	0.00117523	ZNF521	zinc finger protein 521
ENSG00000144724	9.75031	18.2023	-1,04963040962518	5.38126e-05	PTPRG	protein tyrosine phosphatase, receptor type, G
ENSG00000168056	91.2353	198.776	-1,04968340954224	2.20776e-05	LTBP3	latent transforming growth factor beta binding protein 3
ENSG00000242045	34.4651	72.1109	-1,05007800758954	0.0128491	RP1-90K10.3
ENSG00000011295	2.91046	5.96281	-1,05257838696533	0.0370352	TTC19	tetratricopeptide repeat domain 19
ENSG00000102181	18.7475	38.9758	-1,05263752048332	2.93194e-05	CD99L2	CD99 molecule-like 2
ENSG00000104763	22.1053	53.7569	-1,05271893928152	0.000278748	ASAH1	N-acylsphingosine amidohydrolase (acid ceramidase) 1
ENSG00000167632	10.1236	19.0138	-1,05300741566541	0.00354991	TRAPPC9	trafficking protein particle complex 9
ENSG00000120896	250.757	549.118	-1,05382871818764	9.82142e-06	SORBS3	sorbin and SH3 domain containing 3
ENSG00000145349	6.64354	33.111	-1,05501049770058	4.87507e-05	CAMK2D	calcium/calmodulin-dependent protein kinase II delta
ENSG00000156650	4.18932	8.96834	-1,05671099049347	0.000262218	MYST4	MYST histone acetyltransferase (monocytic leukemia) 4
ENSG00000196776	65.4453	121.767	-1,05704034965185	5.2065e-06	CD47	CD47 molecule
ENSG00000196083	2.17572	5.5418	-1,05808021935904	0.033565	IL1RAP	interleukin 1 receptor accessory protein
ENSG00000154305	18.5394	30.3128	-1,06090635807446	0.000376543	MIA3	melanoma inhibitory activity family, member 3
ENSG00000167549	2.57476	6.59267	-1,06093829022064	0.0194102	CORO6	coronin 6
ENSG00000117228	14.8892	33.7302	-1,06153381587536	0.000133384	GBP1	guanylate binding protein 1, interferon-inducible, 67kDa
ENSG00000136378	5.24626	10.591	-1,06283299987089	0.000503422	ADAMTS7	ADAM metallopeptidase with thrombospondin type 1 motif, 7
ENSG00000132424	10.0431	18.4472	-1,06417239212650	0.00121196	SFRS18	splicing factor, arginine/serine-rich 18
ENSG00000168386	49.6138	97.1295	-1,06417484080577	5.4095e-06	FILIP1L	filamin A interacting protein 1-like
ENSG00000170242	26.48	54.1085	-1,06601782111116	2.47494e-05	USP47	ubiquitin specific peptidase 47
ENSG00000132274	33.0182	68.4773	-1,06679996516085	4.48002e-05	TRIM22	tripartite motif containing 22
ENSG00000108395	5.10542	10.9394	-1,0669972410486	0.000491884	TRIM37	tripartite motif containing 37
ENSG00000212747	37.9749	80.3515	-1,06784764877639	8.1182e-05	FAM127C	family with sequence similarity 127, member C
ENSG00000071537	50.7188	103.243	-1,06795192015629	1.0244e-05	SEL1L	sel-1 suppressor of lin-12-like (C. elegans)
ENSG00000133392	2.20019	4.61406	-1,06823378763982	0.00310564	MYH11	myosin, heavy chain 11, smooth muscle
ENSG00000130584	2.5274	4.52056	-1,06937638066602	0.0198655	ZBTB46	zinc finger and BTB domain containing 46
ENSG00000120913	86.8146	176.633	-1,07004144114751	9.96787e-06	PDLIM2	PDZ and LIM domain 2 (mystique)
ENSG00000178467	22.7012	48.1179	-1,07027104794889	0.000238858	P4HTM	prolyl 4-hydroxylase, transmembrane (endoplasmic reticulum)
ENSG00000065357	20.4891	46.9422	-1,0702915239668	2.72418e-05	DGKA	diacylglycerol kinase, alpha 80kDa
ENSG00000121440	8.32892	17.5358	-1,07090034709339	0.00638559	PDZRN3	PDZ domain containing ring finger 3
ENSG00000150760	36.243	22.7233	-1,07108754871465	1.49193e-05	DOCK1	dedicator of cytokinesis 1
ENSG00000143815	6.16754	13.9629	-1,07273345278977	0.0211672	LBR	lamin B receptor
ENSG00000168216	4.80471	10.9995	-1,07334324494293	0.00714294	LMBRD1	LMBR1 domain containing 1
ENSG00000237931	32.8214	71.0669	-1,07417349390721	0.000324834	RP11-469E19.1
ENSG00000092964	38.5856	89.1388	-1,07473320543696	4.40333e-06	DPYSL2	dihydropyrimidinase-like 2
ENSG00000164983	1.86112	4.04995	-1,07502685533380	0.033003	TMEM65	transmembrane protein 65
ENSG00000158122	5.03308	12.0252	-1,07546135885656	0.0135196	C9orf21	chromosome 9 open reading frame 21
ENSG00000144366	12.8857	29.7093	-1,07585928070707	0.00451073	GULP1	GULP, engulfment adaptor PTB domain containing 1
ENSG00000234616	2.25119	4.54671	-1,07598079488641	0.0201805	JRK	jerky homolog (mouse)
ENSG00000168899	68.0754	155.845	-1,07604002949732	2.61635e-05	VAMP5	vesicle-associated membrane protein 5 (myobrevin)
ENSG00000128923	2.64996	5.62147	-1,07612824004729	0.00430043	FAM63B	family with sequence similarity 63, member B
ENSG00000169925	10.9857	21.2008	-1,0766209882272	0.00291597	BRD3	bromodomain containing 3
ENSG00000136379	4.83775	10.5591	-1,07723305573851	0.00458815	FAM108C1	family with sequence similarity 108, member C1
ENSG00000204388	31.9433	70.5074	-1,07737048085957	1.37151e-05	HSPA1B	heat shock 70kDa protein 1B
ENSG00000131652	6.1169	13.8548	-1,07761565071827	0.00973117	THOC6	THO complex 6 homolog (Drosophila)
ENSG00000076513	17.5409	38.4203	-1,07888023437401	7.28106e-06	ANKRD13A	ankyrin repeat domain 13A
ENSG00000114853	9.85342	20.6321	-1,07922137441563	5.63761e-05	ZBTB47	zinc finger and BTB domain containing 47
ENSG00000144935	5.45521	10.7916	-1,08032287016614	0.0136234	TRPC1	transient receptor potential cation channel, subfamily C, member 1
ENSG00000087253	2.06332	4.45225	-1,08053020031736	0.00793676	LPCAT2	lysophosphatidylcholine acyltransferase 2
ENSG00000166938	7.09628	8.99315	-1,08439065758183	0.0262383	DIS3L	DIS3 mitotic control homolog (S. cerevisiae)-like
ENSG00000136928	8.22831	18.1602	-1,08476057675977	3.18259e-05	GABBR2	gamma-aminobutyric acid (GABA) B receptor, 2
ENSG00000166801	6.82862	14.8552	-1,08646528807658	0.00354177	FAM111A	family with sequence similarity 111, member A
ENSG00000146085	2.68073	5.90281	-1,09101159268493	0.00694356	MUT	methylmalonyl CoA mutase
ENSG00000058272	7.06615	15.3238	-1,09235648127151	2.92932e-05	PPP1R12A	protein phosphatase 1, regulatory (inhibitor) subunit 12A
ENSG00000139926	32.8347	72.2221	-1,09291237111819	2.78954e-06	FRMD6	FERM domain containing 6
ENSG00000100697	11.8062	17.2376	-1,09335086942381	0.000413657	DICER1	dicer 1, ribonuclease type III
ENSG00000067900	6.53675	14.0707	-1,09365612874837	2.20575e-05	ROCK1	Rho-associated, coiled-coil containing protein kinase 1
ENSG00000169499	14.9615	44.0579	-1,09366883774327	0.000275893	PLEKHA2	pleckstrin homology domain containing, family A (phosphoinositide binding specific) member 2
ENSG00000100345	849.002	1889.07	-1,09386045669595	0.0148528	MYH9	myosin, heavy chain 9, non-muscle
ENSG00000169991	6.10613	12.9662	-1,09386346933116	0.00112702	IFFO2	intermediate filament family orphan 2
ENSG00000123384	38.9817	83.5407	-1,09399036766495	0.000348435	LRP1	low density lipoprotein receptor-related protein 1
ENSG00000206538	26.572	49.826	-1,09706368931913	1.87831e-05	VGLL3	vestigial like 3 (Drosophila)
ENSG00000143641	51.9187	110.973	-1,09755923336362	3.60611e-06	GALNT2	UDP-N-acetyl-alpha-D-galactosamine:polypeptide N-acetylgalactosaminyltransferase 2 (GalNAc-T2)
ENSG00000115687	3.27946	5.48692	-1,09759711533742	0.0336715	PASK	PAS domain containing serine/threonine kinase
ENSG00000177119	10.9868	23.863	-1,10071377470538	7.87383e-06	ANO6	anoctamin 6
ENSG00000184674	49.293	119.948	-1,10078042500964	0.00013771	GSTT1	glutathione S-transferase theta 1
ENSG00000196950	11.0783	19.3449	-1,10339014781202	0.000469105	SLC39A10	solute carrier family 39 (zinc transporter), member 10
ENSG00000196639	6.94085	15.4048	-1,10345443162979	0.000267223	HRH1	histamine receptor H1
ENSG00000131374	6.24906	18.4883	-1,10388272959487	0.000306549	TBC1D5	TBC1 domain family, member 5
ENSG00000102908	3.03191	6.54502	-1,10525944966153	2.72211e-05	NFAT5	nuclear factor of activated T-cells 5, tonicity-responsive
ENSG00000124942	50.6416	92.6523	-1,10649315597843	7.03397e-05	AHNAK	AHNAK nucleoprotein
ENSG00000225733	10.5253	23.6749	-1,10706365323236	8.94839e-05	AC090937.2
ENSG00000227201	5.65423	12.8071	-1,10759327417225	0.0408273	CNN2P1	calponin 2 pseudogene 1
ENSG00000104412	15.352	31.7784	-1,10777004889930	0.00569855	TTC35	tetratricopeptide repeat domain 35
ENSG00000255103	2.32617	4.99878	-1,10801829157426	0.00270861	KIAA0754	KIAA0754
ENSG00000247909	1.84969	4.06453	-1,11106142412794	0.0337344	AL669918.1
ENSG00000186318	52.4651	102.423	-1,11294405389271	8.50244e-06	BACE1	beta-site APP-cleaving enzyme 1
ENSG00000058668	43.5845	68.6038	-1,1130530868657	4.83412e-06	ATP2B4	ATPase, Ca++ transporting, plasma membrane 4
ENSG00000179954	10.697	23.5068	-1,11357697375137	1.65036e-05	SSC5D	scavenger receptor cysteine rich domain containing (5 domains)
ENSG00000152894	39.9395	92.0813	-1,11373809580540	2.74186e-06	PTPRK	protein tyrosine phosphatase, receptor type, K
ENSG00000164828	54.0988	114.945	-1,11402766346362	5.18631e-06	SUN1	Sad1 and UNC84 domain containing 1
ENSG00000188994	8.10639	15.1088	-1,11539518662939	0.00539252	ZNF292	zinc finger protein 292
ENSG00000153721	2.36242	5.46123	-1,11605649785321	0.0349247	CNKSR3	CNKSR family member 3
ENSG00000117114	1.23508	2.82459	-1,11631659393736	0.0155356	LPHN2	latrophilin 2
ENSG00000037749	9.31626	17.6428	-1,11649157346438	0.00067371	MFAP3	microfibrillar-associated protein 3
ENSG00000163545	4.30178	9.67808	-1,11815232358983	0.00105616	NUAK2	NUAK family, SNF1-like kinase, 2
ENSG00000139998	1.58828	3.48252	-1,11830268873848	0.0405749	RAB15	RAB15, member RAS onocogene family
ENSG00000162496	16.5118	36.7566	-1,11956756091173	0.000311697	DHRS3	dehydrogenase/reductase (SDR family) member 3
ENSG00000137834	4.7822	11.077	-1,12022831112048	0.0110536	SMAD6	SMAD family member 6
ENSG00000165392	2.32211	4.80636	-1,12074340715967	0.00868901	WRN	Werner syndrome, RecQ helicase-like
ENSG00000168016	6.33984	11.3809	-1,12153160807192	0.0012964	TRANK1	tetratricopeptide repeat and ankyrin repeat containing 1
ENSG00000108055	4.4057	9.66719	-1,12207011149915	0.000831231	SMC3	structural maintenance of chromosomes 3
ENSG00000163629	9.43024	21.0041	-1,12229972079730	2.73741e-05	PTPN13	protein tyrosine phosphatase, non-receptor type 13 (APO-1/CD95 (Fas)-associated phosphatase)
ENSG00000213366	25.6177	60.383	-1,12291425348515	9.7648e-05	GSTM2	glutathione S-transferase mu 2 (muscle)
ENSG00000103335	193.523	402.773	-1,12311309404600	4.69983e-05	FAM38A	family with sequence similarity 38, member A
ENSG00000115109	9.41874	16.5202	-1,12352898400432	0.000101923	EPB41L5	erythrocyte membrane protein band 4.1 like 5
ENSG00000114127	11.9501	25.1535	-1,12527898372729	0.000617693	XRN1	5'-3' exoribonuclease 1
ENSG00000173068	4.00876	6.40588	-1,12651147953059	0.0118443	BNC2	basonuclin 2
ENSG00000181458	12.6795	28.9088	-1,12708390489478	0.00229078	TMEM45A	transmembrane protein 45A
ENSG00000138593	7.40742	15.7514	-1,12772675655110	2.12045e-05	SECISBP2L	SECIS binding protein 2-like
ENSG00000138031	25.6928	58.8312	-1,12814741095627	4.89551e-05	ADCY3	adenylate cyclase 3
ENSG00000151718	11.7889	28.4412	-1,12843812828982	2.47494e-05	WWC2	WW and C2 domain containing 2
ENSG00000115159	11.388	25.0622	-1,12927280694152	0.000209741	GPD2	glycerol-3-phosphate dehydrogenase 2 (mitochondrial)
ENSG00000204946	2.32358	5.07811	-1,13016440602421	0.0295726	ZNF783	zinc finger family member 783
ENSG00000104324	19.0059	36.6587	-1,13035168972546	0.000545935	AC010859.1	Plasma glutamate carboxypeptidase
ENSG00000205978	6.29596	16.4058	-1,13090473013952	3.46892e-05	NYNRIN	NYN domain and retroviral integrase containing
ENSG00000198892	23.5791	55.1187	-1,13115207386980	0.000128516	SHISA4	shisa homolog 4 (Xenopus laevis)
ENSG00000136156	58.5696	136.258	-1,13167789695446	1.69055e-06	ITM2B	integral membrane protein 2B
ENSG00000160967	13.1348	31.8486	-1,13490873219261	9.39176e-06	CUX1	cut-like homeobox 1
ENSG00000166398	5.13854	11.4634	-1,13539931455525	0.000131495	KIAA0355	KIAA0355
ENSG00000090975	6.52268	13.1263	-1,13627052288378	0.00036739	PITPNM2	phosphatidylinositol transfer protein, membrane-associated 2
ENSG00000104154	0.968931	2.14571	-1,13661856567498	0.0198655	SLC30A4	solute carrier family 30 (zinc transporter), member 4
ENSG00000204389	30.3865	67.7178	-1,13841480615665	4.527e-06	HSPA1A	heat shock 70kDa protein 1A
ENSG00000140682	66.0149	152.605	-1,14008053271864	2.0944e-06	TGFB1I1	transforming growth factor beta 1 induced transcript 1
ENSG00000131018	5.34053	17.9224	-1,14051209555566	8.00657e-06	SYNE1	spectrin repeat containing, nuclear envelope 1
ENSG00000038427	61.1053	135.576	-1,14117043594213	2.64362e-06	VCAN	versican
ENSG00000147251	1.85015	4.40763	-1,14215142098205	0.00320907	DOCK11	dedicator of cytokinesis 11
ENSG00000071539	9.05308	21.9276	-1,14265736113729	0.0142482	TRIP13	thyroid hormone receptor interactor 13
ENSG00000149633	3.74178	9.46148	-1,14279621206951	0.0043156	KIAA1755	KIAA1755
ENSG00000101596	4.30803	9.42026	-1,14293824699181	3.219e-05	SMCHD1	structural maintenance of chromosomes flexible hinge domain containing 1
ENSG00000136824	2.03646	4.34402	-1,14342851366213	0.00937519	SMC2	structural maintenance of chromosomes 2
ENSG00000104870	23.1251	53.9103	-1,14354535360900	1.01713e-05	FCGRT	Fc fragment of IgG, receptor, transporter, alpha
ENSG00000182179	16.2181	39.7539	-1,14363537464053	0.000378383	UBA7	ubiquitin-like modifier activating enzyme 7
ENSG00000000971	7.30629	16.5765	-1,14378034317383	0.000348163	CFH	complement factor H
ENSG00000196154	175.366	429.293	-1,14754206883299	5.85238e-07	S100A4	S100 calcium binding protein A4
ENSG00000130508	555.59	1214.18	-1,14821933137532	0.00188973	PXDN	peroxidasin homolog (Drosophila)
ENSG00000145147	2.78956	6.40391	-1,14876362487576	0.0078682	SLIT2	slit homolog 2 (Drosophila)
ENSG00000163346	30.3947	70.1989	-1,14905011973424	3.00394e-06	PBXIP1	pre-B-cell leukemia homeobox interacting protein 1
ENSG00000136451	5.43459	12.4081	-1,15045610521994	7.66355e-05	VEZF1	vascular endothelial zinc finger 1
ENSG00000104177	1.23971	2.80177	-1,15075436255924	0.0151257	MYEF2	myelin expression factor 2
ENSG00000167100	12.2705	20.479	-1,15094272021833	0.000665373	SAMD14	sterile alpha motif domain containing 14
ENSG00000007237	3.65218	7.32227	-1,15099962465294	0.000348631	GAS7	growth arrest-specific 7
ENSG00000137941	3.26746	9.29774	-1,15128288606872	0.00944125	TTLL7	tubulin tyrosine ligase-like family, member 7
ENSG00000166479	11.3185	24.0799	-1,15335585420465	1.54687e-05	TMX3	thioredoxin-related transmembrane protein 3
ENSG00000136848	20.9503	45.5097	-1,15342959687989	3.89637e-06	DAB2IP	DAB2 interacting protein
ENSG00000111897	41.0022	94.6921	-1,15387152612924	6.06623e-07	SERINC1	serine incorporator 1
ENSG00000170456	2.62934	4.75565	-1,15401496122629	0.0130876	DENND5B	DENN/MADD domain containing 5B
ENSG00000064666	127.518	303.454	-1,15539539821181	3.07151e-06	CNN2	calponin 2
ENSG00000144711	6.02017	13.0037	-1,15560082616323	4.32973e-05	IQSEC1	IQ motif and Sec7 domain 1
ENSG00000067445	11.7393	26.4854	-1,15584455471194	0.000155671	TRO	trophinin
ENSG00000162616	9.91784	22.6225	-1,15637605380545	0.00272977	DNAJB4	DnaJ (Hsp40) homolog, subfamily B, member 4
ENSG00000010803	6.50568	15.6426	-1,15657271220129	0.000539571	SCMH1	sex comb on midleg homolog 1 (Drosophila)
ENSG00000112655	106.006	217.023	-1,15826662168161	1.42937e-06	PTK7	PTK7 protein tyrosine kinase 7
ENSG00000139178	19.4212	33.4136	-1,15842957129432	0.000515121	C1RL	complement component 1, r subcomponent-like
ENSG00000146373	12.4253	21.4784	-1,15904325687048	0.00261301	RNF217	ring finger protein 217
ENSG00000132549	4.7811	14.4441	-1,15993575755285	0.000128459	VPS13B	vacuolar protein sorting 13 homolog B (yeast)
ENSG00000163378	9.69603	22.3817	-1,16275762388059	0.000199143	C3orf64	chromosome 3 open reading frame 64
ENSG00000162542	11.2239	25.2174	-1,16390703832817	0.000441464	TMCO4	transmembrane and coiled-coil domains 4
ENSG00000083750	8.33277	17.4893	-1,16515901611914	0.0151626	RRAGB	Ras-related GTP binding B
ENSG00000119986	16.8949	39.7293	-1,16560494646521	5.4417e-05	AVPI1	arginine vasopressin-induced 1
ENSG00000083535	9.90401	30.3146	-1,16640402866800	0.00499574	PIBF1	progesterone immunomodulatory binding factor 1
ENSG00000091622	2.07872	4.69372	-1,16697779514992	0.00100567	PITPNM3	PITPNM family member 3
ENSG00000197563	1.53474	3.55992	-1,16791458151961	0.010152	PIGN	phosphatidylinositol glycan anchor biosynthesis, class N
ENSG00000178033	1.28819	3.03177	-1,16837474552782	0.00109603	FAM26E	family with sequence similarity 26, member E
ENSG00000149577	47.4428	108.317	-1,16848499111016	7.4089e-06	SIDT2	SID1 transmembrane family, member 2
ENSG00000148468	15.9503	34.2959	-1,1727985117445	1.96166e-05	FAM171A1	family with sequence similarity 171, member A1
ENSG00000151690	2.88654	7.55037	-1,17280006117564	0.0262383	MFSD6	major facilitator superfamily domain containing 6
ENSG00000156535	9.83326	23.0018	-1,17301662269911	1.12192e-06	CD109	CD109 molecule
ENSG00000198945	1.99466	4.14904	-1,17358156600070	0.0243475	L3MBTL3	l(3)mbt-like 3 (Drosophila)
ENSG00000151967	4.04923	23.1761	-1,17461592904374	0.010375	AC063955.1	Schwannomin-interacting protein 1
ENSG00000165030	17.304	41.2239	-1,17515794676696	4.73853e-06	NFIL3	nuclear factor, interleukin 3 regulated
ENSG00000006534	14.2066	32.3765	-1,17711011627185	3.79763e-05	ALDH3B1	aldehyde dehydrogenase 3 family, member B1
ENSG00000187325	2.11441	4.38555	-1,17813884222563	0.0442267	TAF9B	TAF9B RNA polymerase II, TATA box binding protein (TBP)-associated factor, 31kDa
ENSG00000205189	1.21573	2.57145	-1,17847303890294	0.0346108	ZBTB10	zinc finger and BTB domain containing 10
ENSG00000236739	25.6517	60.3002	-1,17865534823928	0.000644569	RP11-370B11.1
ENSG00000145029	9.14615	18.951	-1,17897483394277	0.00391031	NICN1	nicolin 1
ENSG00000100100	16.719	38.8466	-1,17946251743396	5.74683e-05	PIK3IP1	phosphoinositide-3-kinase interacting protein 1
ENSG00000204217	5.93242	13.1523	-1,18066674377942	1.54541e-06	BMPR2	bone morphogenetic protein receptor, type II (serine/threonine kinase)
ENSG00000168300	4.8682	11.827	-1,18248024234337	0.00254497	PCMTD1	protein-L-isoaspartate (D-aspartate) O-methyltransferase domain containing 1
ENSG00000110315	12.8704	26.0023	-1,18396259896685	0.000375844	RNF141	ring finger protein 141
ENSG00000168778	4.28156	9.43369	-1,18546673673701	0.00532504	TCTN2	tectonic family member 2
ENSG00000164741	68.9495	153.736	-1,18569505694561	5.26626e-07	DLC1	deleted in liver cancer 1
ENSG00000160226	8.34543	21.796	-1,18595762528877	0.00234024	C21orf2	chromosome 21 open reading frame 2
ENSG00000116191	7.06076	13.7444	-1,18601189482013	0.00216287	RALGPS2	Ral GEF with PH domain and SH3 binding motif 2
ENSG00000100403	45.1657	104.894	-1,18629597426489	1.85846e-06	ZC3H7B	zinc finger CCCH-type containing 7B
ENSG00000103145	21.0934	51.7652	-1,18638383567494	0.000266773	HCFC1R1	host cell factor C1 regulator 1 (XPO1 dependent)
ENSG00000101825	1.48301	3.59309	-1,18658274828285	0.000517516	MXRA5	matrix-remodelling associated 5
ENSG00000246979	27.1525	64.5751	-1,18675451738443	5.26835e-07	AC009108.1
ENSG00000253873	5.20752	13.3778	-1,18705620207137	0.000142894	PCDHGA11	protocadherin gamma subfamily A, 11
ENSG00000179456	1.98431	4.71466	-1,18807168353861	0.0164896	ZNF238	zinc finger protein 238
ENSG00000169851	22.4538	42.0942	-1,18860082658994	2.2235e-05	PCDH7	protocadherin 7
ENSG00000186908	2.66008	6.44947	-1,18992669437301	0.00144924	ZDHHC17	zinc finger, DHHC-type containing 17
ENSG00000104219	19.5652	45.3763	-1,1910187384442	8.82759e-05	ZDHHC2	zinc finger, DHHC-type containing 2
ENSG00000139324	2.04964	4.73279	-1,19104250962906	0.000511539	TMTC3	transmembrane and tetratricopeptide repeat containing 3
ENSG00000169607	3.84458	5.10442	-1,19159387723871	0.0440719	CKAP2L	cytoskeleton associated protein 2-like
ENSG00000092096	11.9549	31.7697	-1,19269007671403	6.00095e-05	SLC22A17	solute carrier family 22, member 17
ENSG00000099953	7.78541	17.1455	-1,19376001853143	0.0097729	MMP11	matrix metallopeptidase 11 (stromelysin 3)
ENSG00000113657	60.6602	125.672	-1,19630462314046	6.02053e-07	DPYSL3	dihydropyrimidinase-like 3
ENSG00000170190	3.69288	8.71983	-1,19756182035801	0.00936482	SLC16A5	solute carrier family 16, member 5 (monocarboxylic acid transporter 6)
ENSG00000010610	13.5035	18.3234	-1,19830706737793	0.000678904	CD4	CD4 molecule
ENSG00000231091	158.718	374.184	-1,19855859131848	0.00045191	AC138783.13
ENSG00000143147	8.35779	20.3386	-1,19880950184104	0.000354207	GPR161	G protein-coupled receptor 161
ENSG00000148154	24.1629	54.1655	-1,19981260660071	1.25567e-06	UGCG	UDP-glucose ceramide glucosyltransferase
ENSG00000108370	1.51859	3.8306	-1,20074275716308	0.0477151	RGS9	regulator of G-protein signaling 9
ENSG00000117868	11.8527	27.4851	-1,20132199557139	2.2807e-06	ESYT2	extended synaptotagmin-like protein 2
ENSG00000134824	54.1842	126.528	-1,20135479826994	7.85941e-07	FADS2	fatty acid desaturase 2
ENSG00000054983	3.15056	9.05826	-1,20171154018581	0.00250054	GALC	galactosylceramidase
ENSG00000111671	2.82192	7.08472	-1,20259017106068	0.0415307	SPSB2	splA/ryanodine receptor domain and SOCS box containing 2
ENSG00000143845	17.5759	38.425	-1,20277273049857	0.000324248	ETNK2	ethanolamine kinase 2
ENSG00000115365	9.93261	27.8634	-1,20358410598235	0.000130137	LANCL1	LanC lantibiotic synthetase component C-like 1 (bacterial)
ENSG00000244586	16.1611	38.6603	-1,20391036431595	0.00562575	RP11-875H7.4
ENSG00000102189	3.63414	7.22101	-1,20552535203413	9.59616e-05	EEA1	early endosome antigen 1
ENSG00000108582	9.14951	21.4744	-1,20579678913574	9.73141e-07	CPD	carboxypeptidase D
ENSG00000218336	4.84274	10.3116	-1,20729973427733	0.000120348	ODZ3	odz, odd Oz/ten-m homolog 3 (Drosophila)
ENSG00000105971	102.647	243.01	-1,2083668755933	3.32306e-07	CAV2	caveolin 2
ENSG00000109458	7.0035	10.2181	-1,20859831875229	0.0246653	GAB1	GRB2-associated binding protein 1
ENSG00000169504	124.416	248.961	-1,2120499874985	5.91431e-07	CLIC4	chloride intracellular channel 4
ENSG00000164574	89.8261	192.592	-1,21236034816679	4.05441e-07	GALNT10	UDP-N-acetyl-alpha-D-galactosamine:polypeptide N-acetylgalactosaminyltransferase 10 (GalNAc-T10)
ENSG00000108797	14.9893	35.6541	-1,21296357984356	5.26835e-07	CNTNAP1	contactin associated protein 1
ENSG00000164294	44.0552	109.662	-1,21456008316038	7.89462e-07	GPX8	glutathione peroxidase 8 (putative)
ENSG00000233735	18.6702	43.1596	-1,21780830968487	0.00589877	RP11-567G24.3
ENSG00000163755	7.83424	16.3491	-1,21811866685464	9.82172e-05	HPS3	Hermansky-Pudlak syndrome 3
ENSG00000184838	10.8094	27.2891	-1,21843120147343	0.000743169	PRR16	proline rich 16
ENSG00000101846	1.8676	4.47074	-1,22030387278020	0.000790964	STS	steroid sulfatase (microsomal), isozyme S
ENSG00000224407	9.13871	21.8176	-1,22169226130302	0.00266553	RP5-956O18.3
ENSG00000162520	11.2866	26.4828	-1,22418031033178	5.0187e-05	SYNC	syncoilin, intermediate filament protein
ENSG00000243701	3.03107	5.86357	-1,2242615809474	0.0245057	RP11-446H18.3
ENSG00000068489	2.32607	5.75131	-1,22440253690138	0.0207938	PRR11	proline rich 11
ENSG00000174483	17.1738	33.0116	-1,22514570941608	0.000125125	BBS1	Bardet-Biedl syndrome 1
ENSG00000172667	16.1734	30.004	-1,22515185821859	1.18983e-06	ZMAT3	zinc finger, matrin-type 3
ENSG00000214944	8.85271	21.8557	-1,22600184388068	7.57134e-06	RP11-428C6.1	Rho-guanine nucleotide exchange factor
ENSG00000144677	19.7898	38.1085	-1,22761459122584	1.92733e-05	CTDSPL	CTD (carboxy-terminal domain, RNA polymerase II, polypeptide A) small phosphatase-like
ENSG00000109501	46.0308	114.606	-1,22844457632184	4.00833e-07	WFS1	Wolfram syndrome 1 (wolframin)
ENSG00000225339	2.47237	5.9594	-1,22950301969147	0.000688967	RP11-513I15.6
ENSG00000249835	10.9983	26.3816	-1,23007051604507	0.0225783	CTC-348L14.1
ENSG00000176406	3.17532	24.4136	-1,23394319768425	0.0036657	RIMS2	regulating synaptic membrane exocytosis 2
ENSG00000012983	6.5859	15.728	-1,23429093541077	9.34984e-06	MAP4K5	mitogen-activated protein kinase kinase kinase kinase 5
ENSG00000239697	13.3101	34.8902	-1,23492959293903	0.00039326	TNFSF12	tumor necrosis factor (ligand) superfamily, member 12
ENSG00000213854	4.43268	10.9982	-1,23595424517542	0.0354785	CNN2P6	calponin 2 pseudogene 6
ENSG00000198796	5.72477	13.7223	-1,23733349023916	1.46607e-06	ALPK2	alpha-kinase 2
ENSG00000035403	131.851	313.702	-1,23754057739863	2.82588e-06	VCL	vinculin
ENSG00000115841	3.99435	11.3104	-1,23775787133072	0.0182463	FAM82A1	family with sequence similarity 82, member A1
ENSG00000225511	11.5361	25.6033	-1,23782119449622	0.00559878	C9orf44	chromosome 9 open reading frame 44
ENSG00000072657	13.8989	33.2617	-1,23883941602959	3.5253e-07	TRHDE	thyrotropin-releasing hormone degrading enzyme
ENSG00000182218	1.41979	3.25837	-1,23906099885097	0.0277284	HHIPL1	HHIP-like 1
ENSG00000132613	33.1603	81.387	-1,24159295405737	4.71752e-07	MTSS1L	metastasis suppressor 1-like
ENSG00000160613	56.1333	95.0204	-1,24183338035611	2.59924e-07	PCSK7	proprotein convertase subtilisin/kexin type 7
ENSG00000151466	2.70835	6.17282	-1,24333192157697	0.0499079	SCLT1	sodium channel and clathrin linker 1
ENSG00000077809	45.7	103.321	-1,24561287542905	1.67366e-07	GTF2I	general transcription factor IIi
ENSG00000095951	17.1834	15.7796	-1,24610979366202	8.51748e-05	HIVEP1	human immunodeficiency virus type I enhancer binding protein 1
ENSG00000094631	9.34477	26.8243	-1,24632383463001	0.00014274	HDAC6	histone deacetylase 6
ENSG00000107984	17.3874	39.1648	-1,24832984369081	0.000408091	DKK1	dickkopf homolog 1 (Xenopus laevis)
ENSG00000093009	3.11889	8.71725	-1,24848681219783	0.0482048	CDC45	cell division cycle 45 homolog (S. cerevisiae)
ENSG00000129038	80.1265	198.136	-1,25105415202944	4.07047e-07	LOXL1	lysyl oxidase-like 1
ENSG00000110628	17.5917	41.2961	-1,25256999941985	0.000331507	SLC22A18	solute carrier family 22, member 18
ENSG00000172731	1.7005	4.04815	-1,25344479642340	0.0164198	LRRC20	leucine rich repeat containing 20
ENSG00000137075	2.66315	8.5404	-1,25410469760856	0.000815976	RNF38	ring finger protein 38
ENSG00000013288	34.9197	74.9286	-1,25441410684217	2.33829e-07	MAN2B2	mannosidase, alpha, class 2B, member 2
ENSG00000107186	5.21385	13.7936	-1,25507272339887	3.22065e-05	MPDZ	multiple PDZ domain protein
ENSG00000162994	5.8058	15.6195	-1,25576120500914	0.0259279	C2orf63	chromosome 2 open reading frame 63
ENSG00000179981	1.63828	4.0054	-1,25636366227079	0.00291141	TSHZ1	teashirt zinc finger homeobox 1
ENSG00000003436	40.7998	93.059	-1,25641356684327	2.1741e-07	TFPI	tissue factor pathway inhibitor (lipoprotein-associated coagulation inhibitor)
ENSG00000141447	9.97382	24.9626	-1,25809126642218	7.99879e-06	OSBPL1A	oxysterol binding protein-like 1A
ENSG00000163848	12.5002	24.0712	-1,26074174543202	0.00012818	ZNF148	zinc finger protein 148
ENSG00000152558	68.7059	156.48	-1,2634787330437	1.17629e-07	TMEM123	transmembrane protein 123
ENSG00000166741	33.0322	86.2241	-1,26499286967718	2.59651e-05	NNMT	nicotinamide N-methyltransferase
ENSG00000253953	8.4427	20.8277	-1,26500814546117	9.32027e-07	PCDHGB4	protocadherin gamma subfamily B, 4
ENSG00000118515	23.4421	62.0591	-1,26506600686128	3.62974e-06	SGK1	serum/glucocorticoid regulated kinase 1
ENSG00000091136	174.167	433.972	-1,26555773321243	1.14328e-06	LAMB1	laminin, beta 1
ENSG00000164674	4.25096	11.6745	-1,26607495175962	0.00305883	SYTL3	synaptotagmin-like 3
ENSG00000186854	15.5499	37.2962	-1,26664902284913	4.72834e-05	C2orf89	chromosome 2 open reading frame 89
ENSG00000148120	7.57584	17.6388	-1,26769487115316	0.00198496	C9orf3	chromosome 9 open reading frame 3
ENSG00000154678	7.00463	15.1271	-1,26973514887075	0.000240871	PDE1C	phosphodiesterase 1C, calmodulin-dependent 70kDa
ENSG00000172594	4.43486	10.4708	-1,27016875810840	0.00411629	SMPDL3A	sphingomyelin phosphodiesterase, acid-like 3A
ENSG00000010704	5.94185	14.9393	-1,27092794590748	0.0051825	HFE	hemochromatosis
ENSG00000196526	17.28	38.7413	-1,27102347932683	1.02094e-07	AFAP1	actin filament associated protein 1
ENSG00000168615	90.269	220.924	-1,27157159765820	9.86889e-08	ADAM9	ADAM metallopeptidase domain 9
ENSG00000108846	20.2502	34.5505	-1,27174780553293	6.96919e-06	ABCC3	ATP-binding cassette, sub-family C (CFTR/MRP), member 3
ENSG00000170271	7.16742	9.91618	-1,27417215380934	0.00513796	C5orf4	chromosome 5 open reading frame 4
ENSG00000073712	21.1304	53.1391	-1,27483936109450	1.36159e-07	FERMT2	fermitin family member 2
ENSG00000133812	16.3074	35.5097	-1,27500358254442	7.34056e-06	SBF2	SET binding factor 2
ENSG00000100625	2.01037	4.98831	-1,27770552579222	0.000341267	SIX4	SIX homeobox 4
ENSG00000008441	19.3019	47.9364	-1,27795047070461	1.63941e-07	NFIX	nuclear factor I/X (CCAAT-binding transcription factor)
ENSG00000176020	1.06256	2.78727	-1,28041983719682	0.0245974	AMIGO3	adhesion molecule with Ig-like domain 3
ENSG00000132386	9.05002	23.181	-1,28074661691691	0.000145579	SERPINF1	serpin peptidase inhibitor, clade F (alpha-2 antiplasmin, pigment epithelium derived factor), member 1
ENSG00000178184	6.75488	11.6105	-1,28087841727328	0.00154562	PARD6G	par-6 partitioning defective 6 homolog gamma (C. elegans)
ENSG00000184271	1.24308	3.02643	-1,28093864238647	0.0234558	POU6F1	POU class 6 homeobox 1
ENSG00000114019	91.4353	233.523	-1,28110341348458	1.14546e-07	AMOTL2	angiomotin like 2
ENSG00000146802	5.95279	13.6367	-1,28143191959625	0.0043726	TMEM168	transmembrane protein 168
ENSG00000111684	18.0311	46.9404	-1,28201104994292	5.78188e-05	LPCAT3	lysophosphatidylcholine acyltransferase 3
ENSG00000172716	9.42543	13.7863	-1,28229204283648	0.00430609	SLFN11	schlafen family member 11
ENSG00000067167	107.277	254.87	-1,28345917158497	3.85012e-08	TRAM1	translocation associated membrane protein 1
ENSG00000136111	1.01978	3.46868	-1,28372109904598	0.0149152	TBC1D4	TBC1 domain family, member 4
ENSG00000146072	5.61136	14.1518	-1,28458596509837	1.9073e-05	TNFRSF21	tumor necrosis factor receptor superfamily, member 21
ENSG00000198554	1.44861	3.39632	-1,28597050908646	0.0454753	WDHD1	WD repeat and HMG-box DNA binding protein 1
ENSG00000199060	340.345	865.525	-1,28690438498910	2.49587e-06	MIR22	microRNA 22
ENSG00000251022	3.18518	10.0798	-1,28754811422525	0.0191341	RP11-163O17.1
ENSG00000102057	2.49434	5.21584	-1,28773122754233	0.0218796	KCND1	potassium voltage-gated channel, Shal-related subfamily, member 1
ENSG00000134291	9.27536	23.9802	-1,28821831053596	0.000139189	TMEM106C	transmembrane protein 106C
ENSG00000071967	46.9835	104.991	-1,28839295947711	1.1251e-07	CYBRD1	cytochrome b reductase 1
ENSG00000119280	16.7608	37.8369	-1,29073657065695	2.07746e-07	C1orf198	chromosome 1 open reading frame 198
ENSG00000145730	141.672	310.864	-1,29817314239016	4.03847e-08	PAM	peptidylglycine alpha-amidating monooxygenase
ENSG00000088325	3.21324	8.23881	-1,29861627832239	0.000357428	TPX2	TPX2, microtubule-associated, homolog (Xenopus laevis)
ENSG00000116750	8.97072	17.095	-1,29894155662436	0.00179584	UCHL5	ubiquitin carboxyl-terminal hydrolase L5
ENSG00000181690	1.56525	3.26134	-1,29996056689735	0.00979417	PLAG1	pleiomorphic adenoma gene 1
ENSG00000067141	11.7574	29.9944	-1,30008590512849	6.90614e-08	NEO1	neogenin 1
ENSG00000058056	7.35932	15.4663	-1,30086060259716	2.8201e-05	USP13	ubiquitin specific peptidase 13 (isopeptidase T-3)
ENSG00000112078	23.3286	52.3361	-1,30267044177783	8.91534e-08	KCTD20	potassium channel tetramerisation domain containing 20
ENSG00000186594	8.90251	22.4897	-1,30327782649052	0.00026053	C17orf91	chromosome 17 open reading frame 91
ENSG00000177200	2.35297	5.79791	-1,30415726575290	3.25308e-05	CHD9	chromodomain helicase DNA binding protein 9
ENSG00000149582	18.5478	41.7317	-1,30722468846732	0.000102238	TMEM25	transmembrane protein 25
ENSG00000184445	3.52471	17.0674	-1,30877900905826	0.00569855	KNTC1	kinetochore associated 1
ENSG00000235162	43.107	112.407	-1,30945610854337	5.72099e-08	C12orf75	chromosome 12 open reading frame 75
ENSG00000115318	16.2596	46.9743	-1,31164378835049	2.7975e-07	LOXL3	lysyl oxidase-like 3
ENSG00000113369	16.3298	36.301	-1,31426557897883	5.27165e-05	ARRDC3	arrestin domain containing 3
ENSG00000138134	10.3234	26.6291	-1,31478341890425	7.32874e-06	STAMBPL1	STAM binding protein-like 1
ENSG00000172037	394.087	981.357	-1,31515462444335	1.35415e-06	LAMB2	laminin, beta 2 (laminin S)
ENSG00000144810	33.6234	71.7416	-1,31657550202884	1.15765e-07	COL8A1	collagen, type VIII, alpha 1
ENSG00000145860	36.6327	106.062	-1,31738761937957	4.4873e-08	RNF145	ring finger protein 145
ENSG00000131634	5.0914	13.2646	-1,31773613091819	0.0121958	TMEM204	transmembrane protein 204
ENSG00000197646	7.4674	19.4687	-1,31848068757009	2.99874e-05	PDCD1LG2	programmed cell death 1 ligand 2
ENSG00000161800	2.58748	7.01031	-1,31896484261751	0.00108124	RACGAP1	Rac GTPase activating protein 1
ENSG00000213347	8.05187	13.7458	-1,32011631445128	0.00124819	MXD3	MAX dimerization protein 3
ENSG00000111885	2.24769	5.63802	-1,32044422408606	0.000288525	MAN1A1	mannosidase, alpha, class 1A, member 1
ENSG00000240771	9.6765	27.9915	-1,32113177024592	0.000232044	ARHGEF25	Rho guanine nucleotide exchange factor (GEF) 25
ENSG00000164307	13.055	31.2362	-1,32288882051335	3.47824e-05	ERAP1	endoplasmic reticulum aminopeptidase 1
ENSG00000156162	11.2651	28.9429	-1,32498999714898	0.000334041	DPY19L4	dpy-19-like 4 (C. elegans)
ENSG00000196693	4.27595	10.9623	-1,32569509826162	0.0317434	ZNF33B	zinc finger protein 33B
ENSG00000182700	1.08366	2.79411	-1,33041094955049	0.045421	C5orf53	chromosome 5 open reading frame 53
ENSG00000196507	3.84058	10.5491	-1,3325181709052	0.01071	TCEAL3	transcription elongation factor A (SII)-like 3
ENSG00000182326	74.1578	239.014	-1,33425662322179	1.18481e-08	C1S	complement component 1, s subcomponent
ENSG00000146281	0.958857	2.48545	-1,33527989414360	0.0137233	PM20D2	peptidase M20 domain containing 2
ENSG00000112992	12.9284	27.3121	-1,33712463670382	3.90219e-06	NNT	nicotinamide nucleotide transhydrogenase
ENSG00000177943	2.59667	5.65274	-1,33764381740845	0.00170441	MAMDC4	MAM domain containing 4
ENSG00000123358	4.55319	11.8072	-1,33815363315109	0.0001989	NR4A1	nuclear receptor subfamily 4, group A, member 1
ENSG00000165617	3.21248	8.92138	-1,33825161802916	0.000711305	DACT1	dapper, antagonist of beta-catenin, homolog 1 (Xenopus laevis)
ENSG00000117242	0.922243	2.4304	-1,33842821710331	0.0137405	PINK1-AS1	PINK1 antisense RNA 1 (non-protein coding)
ENSG00000101290	28.4833	49.6169	-1,33859081998702	9.10656e-08	CDS2	CDP-diacylglycerol synthase (phosphatidate cytidylyltransferase) 2
ENSG00000105429	5.64047	14.2549	-1,33921960038718	1.4362e-07	MEGF8	multiple EGF-like-domains 8
ENSG00000006576	4.20346	13.2455	-1,34073813433706	0.000126356	PHTF2	putative homeodomain transcription factor 2
ENSG00000180628	10.9422	18.5795	-1,34173804150538	4.8607e-05	PCGF5	polycomb group ring finger 5
ENSG00000125257	21.5344	56.2372	-1,34288470767763	1.2258e-08	ABCC4	ATP-binding cassette, sub-family C (CFTR/MRP), member 4
ENSG00000117020	8.08513	17.3584	-1,34440204190503	5.07997e-06	AKT3	v-akt murine thymoma viral oncogene homolog 3 (protein kinase B, gamma)
ENSG00000114737	2.40335	6.62229	-1,34518928604116	0.00689944	CISH	cytokine inducible SH2-containing protein
ENSG00000145725	9.89533	24.3946	-1,34524446600002	7.2605e-05	PPIP5K2	diphosphoinositol pentakisphosphate kinase 2
ENSG00000022267	64.0475	161.927	-1,34531898866659	3.77307e-08	FHL1	four and a half LIM domains 1
ENSG00000125966	1.30714	3.26578	-1,34697811389581	0.0218177	MMP24	matrix metallopeptidase 24 (membrane-inserted)
ENSG00000115232	9.38298	20.3986	-1,34818035389681	3.62933e-05	ITGA4	integrin, alpha 4 (antigen CD49D, alpha 4 subunit of VLA-4 receptor)
ENSG00000164117	2.09162	5.82898	-1,34849621376576	0.0483848	FBXO8	F-box protein 8
ENSG00000075702	1.20925	2.77453	-1,35082686013493	0.0151257	WDR62	WD repeat domain 62
ENSG00000104332	191.453	474.451	-1,35103642737739	4.40333e-06	SFRP1	secreted frizzled-related protein 1
ENSG00000198887	2.88124	7.13893	-1,35217839488036	0.000749002	SMC5	structural maintenance of chromosomes 5
ENSG00000198001	1.88383	5.04715	-1,35271798981393	0.00224235	IRAK4	interleukin-1 receptor-associated kinase 4
ENSG00000164932	167.241	464.71	-1,35468612296455	9.27482e-09	CTHRC1	collagen triple helix repeat containing 1
ENSG00000140092	33.5762	89.3758	-1,35517630606745	2.11415e-08	FBLN5	fibulin 5
ENSG00000112210	8.16249	22.2631	-1,35704819378298	3.56873e-06	RAB23	RAB23, member RAS oncogene family
ENSG00000170004	43.4097	101.813	-1,35711716138973	1.31579e-08	CHD3	chromodomain helicase DNA binding protein 3
ENSG00000213462	2.64483	5.58097	-1,35772100172472	0.0165494	ERV3	endogenous retroviral sequence 3
ENSG00000129636	13.3204	35.227	-1,35839913446427	9.21499e-07	ITFG1	integrin alpha FG-GAP repeat containing 1
ENSG00000110108	29.4275	73.3244	-1,35901336797159	3.45996e-07	TMEM109	transmembrane protein 109
ENSG00000197724	2.70783	7.05161	-1,36205480321443	3.91299e-05	PHF2	PHD finger protein 2
ENSG00000112312	3.14227	7.9252	-1,36664752064635	0.0287519	GMNN	geminin, DNA replication inhibitor
ENSG00000171132	11.881	23.8359	-1,36731020931177	0.00053805	PRKCE	protein kinase C, epsilon
ENSG00000107036	10.3201	26.6454	-1,37049431280579	8.82509e-08	KIAA1432	KIAA1432
ENSG00000162929	3.45216	9.08322	-1,37108155042781	0.0257349	KIAA1841	KIAA1841
ENSG00000135776	2.66612	6.5207	-1,37139096735796	0.00353402	ABCB10	ATP-binding cassette, sub-family B (MDR/TAP), member 10
ENSG00000010292	10.4486	29.4227	-1,37147308960418	6.83204e-05	NCAPD2	non-SMC condensin I complex, subunit D2
ENSG00000139174	2.47029	6.64506	-1,37185218262307	0.000268707	PRICKLE1	prickle homolog 1 (Drosophila)
ENSG00000107821	6.12932	14.7014	-1,37252001581592	0.0036679	KAZALD1	Kazal-type serine peptidase inhibitor domain 1
ENSG00000170989	2.61091	6.61569	-1,37395951915206	0.0165494	S1PR1	sphingosine-1-phosphate receptor 1
ENSG00000167157	18.2606	50.9633	-1,37724689483300	1.38433e-06	PRRX2	paired related homeobox 2
ENSG00000188452	2.44977	4.67066	-1,37759104509171	0.0470886	CERKL	ceramide kinase-like
ENSG00000112186	11.4422	31.4463	-1,37834377346554	1.23248e-05	CAP2	CAP, adenylate cyclase-associated protein, 2 (yeast)
ENSG00000197119	3.78187	10.3512	-1,38089689104689	0.000499238	SLC25A29	solute carrier family 25, member 29
ENSG00000136044	7.71028	21.2238	-1,38331417116789	1.10311e-06	APPL2	adaptor protein, phosphotyrosine interaction, PH domain and leucine zipper containing 2
ENSG00000109756	24.5018	52.1909	-1,38343748831743	1.80766e-07	RAPGEF2	Rap guanine nucleotide exchange factor (GEF) 2
ENSG00000008256	18.9907	41.9847	-1,38363313189733	6.03017e-07	CYTH3	cytohesin 3
ENSG00000101745	2.41229	5.54081	-1,38368766383038	5.8793e-05	ANKRD12	ankyrin repeat domain 12
ENSG00000180354	3.32832	7.4989	-1,38470368700379	0.00405369	C7orf41	chromosome 7 open reading frame 41
ENSG00000121957	2.22289	5.27243	-1,38747989636275	0.0266286	GPSM2	G-protein signaling modulator 2
ENSG00000141258	6.2702	16.8293	-1,38784178923211	4.53409e-07	SGSM2	small G protein signaling modulator 2
ENSG00000125384	2.81061	7.62729	-1,38878422504837	0.00169057	PTGER2	prostaglandin E receptor 2 (subtype EP2), 53kDa
ENSG00000200278	27.8669	71.9155	-1,38935392533342	0.0342278	5S_rRNA.69	5S ribosomal RNA
ENSG00000090889	0.888893	2.61432	-1,3895662532887	0.0309387	KIF4A	kinesin family member 4A
ENSG00000220785	1.87672	4.95582	-1,38984176314269	0.0202319	MTMR9LP	myotubularin related protein 9-like, pseudogene
ENSG00000142599	52.8183	112.372	-1,39111673223372	7.42695e-09	RERE	arginine-glutamic acid dipeptide (RE) repeats
ENSG00000234456	31.6343	83.6088	-1,39147459593749	2.56269e-06	AC004945.2
ENSG00000123374	17.3192	47.6452	-1,39191599967342	2.19928e-07	CDK2	cyclin-dependent kinase 2
ENSG00000166912	3.83526	8.57959	-1,39405341832987	4.91988e-05	MTMR10	myotubularin related protein 10
ENSG00000140416	242.717	646.846	-1,39776571782002	2.96038e-07	TPM1	tropomyosin 1 (alpha)
ENSG00000100321	21.0385	57.3827	-1,39943498068497	2.11204e-06	SYNGR1	synaptogyrin 1
ENSG00000162976	12.8992	31.8581	-1,40006407237441	0.000446158	PQLC3	PQ loop repeat containing 3
ENSG00000085224	5.695	13.499	-1,40069623269614	2.06828e-06	ATRX	alpha thalassemia/mental retardation syndrome X-linked
ENSG00000064687	2.499	5.22209	-1,40216682560544	0.0496278	ABCA7	ATP-binding cassette, sub-family A (ABC1), member 7
ENSG00000122952	4.26434	12.9989	-1,40264672911224	0.00308142	ZWINT	ZW10 interactor
ENSG00000136108	3.27365	11.6779	-1,40298900797638	0.000915849	CKAP2	cytoskeleton associated protein 2
ENSG00000074047	5.50554	14.7428	-1,40316288544139	1.35902e-06	GLI2	GLI family zinc finger 2
ENSG00000165512	1.72079	4.79257	-1,40432941687142	0.00639915	ZNF22	zinc finger protein 22 (KOX 15)
ENSG00000186951	2.34037	10.8929	-1,40720722274895	8.77306e-05	PPARA	peroxisome proliferator-activated receptor alpha
ENSG00000173156	9.56128	27.0103	-1,40730046350800	0.00043543	RHOD	ras homolog gene family, member D
ENSG00000141736	11.2349	30.1843	-1,40813341763522	5.14001e-08	ERBB2	v-erb-b2 erythroblastic leukemia viral oncogene homolog 2, neuro/glioblastoma derived oncogene homolog (avian)
ENSG00000225282	9.06182	25.1401	-1,40851872917695	7.88282e-06	AP000350.6
ENSG00000215570	2.34879	6.35218	-1,40881117294989	0.0066669	AL136219.1
ENSG00000222999	394.299	1092.36	-1,40890964397528	3.05088e-08	AC105247.1
ENSG00000113391	4.99362	12.8725	-1,41123042007736	0.00376347	FAM172A	family with sequence similarity 172, member A
ENSG00000109790	83.2728	215.732	-1,41213091426611	1.91899e-09	KLHL5	kelch-like 5 (Drosophila)
ENSG00000167371	1.07716	3.03856	-1,41281689479161	0.0195895	PRRT2	proline-rich transmembrane protein 2
ENSG00000165406	4.41387	11.7057	-1,41294935504434	9.91893e-05	MARCH8	membrane-associated ring finger (C3HC4) 8
ENSG00000180801	18.0554	46.7014	-1,41389949168872	3.57554e-08	ARSJ	arylsulfatase family, member J
ENSG00000149639	4.38819	11.6862	-1,41421315660085	5.28867e-08	KIAA0889	KIAA0889
ENSG00000178904	3.38249	7.44228	-1,41463015466382	7.08505e-05	DPY19L3	dpy-19-like 3 (C. elegans)
ENSG00000147548	13.502	26.4172	-1,41508898193616	6.57063e-07	WHSC1L1	Wolf-Hirschhorn syndrome candidate 1-like 1
ENSG00000251192	2.88875	5.61392	-1,41513618400351	0.0496228	ZNF674	zinc finger protein 674
ENSG00000093100	2.42857	6.43482	-1,41580894186701	7.23229e-05	XXbac-B461K10.4	protein MICAL-3 isoform 1
ENSG00000171843	7.87677	15.5933	-1,41614981130211	0.00142882	MLLT3	myeloid/lymphoid or mixed-lineage leukemia (trithorax homolog, Drosophila); translocated to, 3
ENSG00000112118	5.76663	14.8032	-1,41673652848728	2.08724e-05	MCM3	minichromosome maintenance complex component 3
ENSG00000188112	3.32699	8.8048	-1,41713019795519	1.34326e-05	C6orf132	chromosome 6 open reading frame 132
ENSG00000084112	16.2548	40.7964	-1,42149126380068	2.78455e-09	SSH1	slingshot homolog 1 (Drosophila)
ENSG00000073605	1.57568	3.66489	-1,42187332016951	0.0248015	GSDMB	gasdermin B
ENSG00000070018	12.0547	28.6814	-1,42196070937178	5.72497e-07	LRP6	low density lipoprotein receptor-related protein 6
ENSG00000168685	16.0564	38.5976	-1,42199799978692	4.42963e-08	IL7R	interleukin 7 receptor
ENSG00000144455	6.00347	15.9521	-1,42282569281543	0.000125691	SUMF1	sulfatase modifying factor 1
ENSG00000247614	2.91371	7.84429	-1,4237439905215	0.0316264	AC119673.1
ENSG00000183688	8.87406	24.5266	-1,42491524803791	9.59347e-08	FAM101B	family with sequence similarity 101, member B
ENSG00000197565	2.40164	6.8101	-1,42782907792594	0.000236898	COL4A6	collagen, type IV, alpha 6
ENSG00000198189	5.07143	12.9695	-1,42853288497051	0.00321107	HSD17B11	hydroxysteroid (17-beta) dehydrogenase 11
ENSG00000170775	10.8707	30.4541	-1,42870978235284	4.77883e-08	GPR37	G protein-coupled receptor 37 (endothelin receptor type B-like)
ENSG00000124006	16.7879	50.3637	-1,43123413975032	4.5834e-08	OBSL1	obscurin-like 1
ENSG00000031003	6.38824	16.7465	-1,43185938782017	4.64512e-06	FAM13B	family with sequence similarity 13, member B
ENSG00000137312	87.3993	240.914	-1,43258271299584	2.96699e-09	FLOT1	flotillin 1
ENSG00000186919	3.66822	9.68974	-1,43317652102216	0.0024359	ZACN	zinc activated ligand-gated ion channel
ENSG00000185532	2.97336	7.28156	-1,43342185280976	6.83307e-05	PRKG1	protein kinase, cGMP-dependent, type I
ENSG00000165996	11.6831	30.4169	-1,43706443784049	0.000187789	PTPLA	protein tyrosine phosphatase-like (proline instead of catalytic arginine), member A
ENSG00000154380	25.7066	68.3325	-1,4380011073335	6.02932e-09	ENAH	enabled homolog (Drosophila)
ENSG00000107104	14.1409	11.1643	-1,44069793668426	1.59587e-06	KANK1	KN motif and ankyrin repeat domains 1
ENSG00000165685	1.8431	5.23869	-1,44100688818337	0.0305225	C12orf59	chromosome 12 open reading frame 59
ENSG00000103449	12.1181	30.0869	-1,44180372238772	2.76164e-08	SALL1	sal-like 1 (Drosophila)
ENSG00000121578	13.9871	49.4408	-1,44232664518322	2.08302e-06	B4GALT4	UDP-Gal:betaGlcNAc beta 1,4- galactosyltransferase, polypeptide 4
ENSG00000075826	3.32498	6.05277	-1,44273701613581	0.0108767	SEC31B	SEC31 homolog B (S. cerevisiae)
ENSG00000135269	19.4309	62.1786	-1,44468542058098	5.89034e-07	TES	testis derived transcript (3 LIM domains)
ENSG00000113805	1.91522	4.46095	-1,44522102583438	0.00280025	CNTN3	contactin 3 (plasmacytoma associated)
ENSG00000172830	15.3382	44.5475	-1,44910200107460	2.88379e-06	SSH3	slingshot homolog 3 (Drosophila)
ENSG00000198873	12.2924	35.3085	-1,45034242118063	4.98564e-07	GRK5	G protein-coupled receptor kinase 5
ENSG00000122642	152.583	437.346	-1,4503683484777	2.01e-09	FKBP9	FK506 binding protein 9, 63 kDa
ENSG00000152953	3.42832	9.63397	-1,45126680592454	0.000742541	STK32B	serine/threonine kinase 32B
ENSG00000136205	42.2759	117.686	-1,45707356820188	3.52822e-09	TNS3	tensin 3
ENSG00000196628	4.17263	11.4699	-1,45759129582634	5.738e-07	TCF4	transcription factor 4
ENSG00000102760	32.9217	97.6995	-1,45761909382975	1.86678e-07	C13orf15	chromosome 13 open reading frame 15
ENSG00000131171	19.9913	55.1315	-1,45835221989065	1.53441e-07	SH3BGRL	SH3 domain binding glutamic acid-rich protein like
ENSG00000179403	1.89876	4.60631	-1,46087299094798	0.0138484	VWA1	von Willebrand factor A domain containing 1
ENSG00000159200	24.0149	75.8283	-1,46163770682221	1.09405e-09	RCAN1	regulator of calcineurin 1
ENSG00000114698	1.66696	5.97011	-1,46173448795075	0.0200786	PLSCR4	phospholipid scramblase 4
ENSG00000003989	3.06147	9.22211	-1,46184302563554	1.8847e-07	SLC7A2	solute carrier family 7 (cationic amino acid transporter, y+ system), member 2
ENSG00000173517	3.89165	10.9175	-1,46274693980926	8.77492e-09	AC087465.1	Pseudopodium-enriched atypical kinase 1
ENSG00000118762	24.8925	63.0663	-1,46545411959620	7.05936e-09	PKD2	polycystic kidney disease 2 (autosomal dominant)
ENSG00000164066	3.52897	9.0372	-1,46568759217339	0.016807	INTU	inturned planar cell polarity effector homolog (Drosophila)
ENSG00000134318	12.373	34.5098	-1,46823035813592	3.93254e-09	ROCK2	Rho-associated, coiled-coil containing protein kinase 2
ENSG00000214147	3.30637	9.19635	-1,47209939615875	0.00907678	RP11-332P22.2
ENSG00000171848	14.5078	42.1483	-1,47221420298703	3.34595e-06	RRM2	ribonucleotide reductase M2
ENSG00000069869	14.1061	43.9676	-1,47254135866067	1.02951e-09	NEDD4	neural precursor cell expressed, developmentally down-regulated 4
ENSG00000122694	13.0545	38.3746	-1,47265389249874	1.07678e-06	GLIPR2	GLI pathogenesis-related 2
ENSG00000142303	1.02486	2.92291	-1,47360487287636	0.00481045	ADAMTS10	ADAM metallopeptidase with thrombospondin type 1 motif, 10
ENSG00000196562	2.1604	3.71306	-1,47613330086224	0.0421073	SULF2	sulfatase 2
ENSG00000232220	20.3583	60.434	-1,47979557458344	8.4167e-05	AC008440.5
ENSG00000176826	17.4392	50.7377	-1,47983347014279	1.94182e-08	FKBP9L	FK506 binding protein 9-like
ENSG00000116774	11.3475	33.5288	-1,4830417361942	4.82469e-07	OLFML3	olfactomedin-like 3
ENSG00000171992	13.1377	41.2335	-1,48360943463154	2.57997e-09	SYNPO	synaptopodin
ENSG00000072133	2.60418	6.60772	-1,48957549990521	0.0122149	RPS6KA6	ribosomal protein S6 kinase, 90kDa, polypeptide 6
ENSG00000196177	2.01822	5.72278	-1,49185836905524	0.0114589	ACADSB	acyl-CoA dehydrogenase, short/branched chain
ENSG00000155755	1.41264	7.88029	-1,49310783522023	0.00128115	ALS2CR4	amyotrophic lateral sclerosis 2 (juvenile) chromosome region, candidate 4
ENSG00000162576	244.539	715.271	-1,49569989286829	1.1009e-08	MXRA8	matrix-remodelling associated 8
ENSG00000092140	1.48117	4.33578	-1,49694687106588	0.00793572	G2E3	G2/M-phase specific E3 ubiquitin protein ligase
ENSG00000165124	3.3832	10.6446	-1,49862110465596	3.10816e-08	SVEP1	sushi, von Willebrand factor type A, EGF and pentraxin domain containing 1
ENSG00000142794	5.4534	14.0359	-1,49893237151745	3.33186e-05	NBPF3	neuroblastoma breakpoint family, member 3
ENSG00000182621	1.89493	5.01114	-1,49900467812648	0.00149043	PLCB1	phospholipase C, beta 1 (phosphoinositide-specific)
ENSG00000187244	9.05712	26.4305	-1,50090033125586	2.99681e-07	BCAM	basal cell adhesion molecule (Lutheran blood group)
ENSG00000125648	5.93933	16.5935	-1,50106379989367	2.02966e-05	SLC25A23	solute carrier family 25 (mitochondrial carrier; phosphate carrier), member 23
ENSG00000113140	1160.32	3260.79	-1,50121009145106	2.20226e-05	SPARC	secreted protein, acidic, cysteine-rich (osteonectin)
ENSG00000071794	4.60861	12.2229	-1,50186074126468	8.43429e-05	HLTF	helicase-like transcription factor
ENSG00000185379	3.52085	10.8377	-1,50194236658242	0.00188211	RAD51L3	RAD51-like 3 (S. cerevisiae)
ENSG00000165757	36.0538	98.3357	-1,50362005279036	3.74225e-10	KIAA1462	KIAA1462
ENSG00000173230	7.15176	21.3421	-1,50449271908926	1.48732e-08	GOLGB1	golgin B1
ENSG00000214021	12.3483	32.7933	-1,50527206355998	2.19161e-06	TTLL3	tubulin tyrosine ligase-like family, member 3
ENSG00000166923	142.889	432.779	-1,50530602228534	1.93019e-07	GREM1	gremlin 1
ENSG00000151914	21.2954	62.394	-1,50646054975083	4.9739e-10	DST	dystonin
ENSG00000182511	4.75231	14.3903	-1,50889322270056	0.00326636	FES	feline sarcoma oncogene
ENSG00000164050	20.41	56.7973	-1,50926049103874	5.40349e-08	PLXNB1	plexin B1
ENSG00000241644	9.28877	29.5042	-1,51143137607547	1.46132e-06	INMT	indolethylamine N-methyltransferase
ENSG00000004399	47.7063	145.092	-1,51209034561232	1.68409e-09	PLXND1	plexin D1
ENSG00000215252	1.43224	4.11266	-1,51430003419018	0.000283913	GOLGA8B	golgin A8 family, member B
ENSG00000116962	14.7252	42.0544	-1,5157261758451	5.43449e-10	NID1	nidogen 1
ENSG00000110237	44.4048	117.998	-1,51747289143509	5.52652e-10	ARHGEF17	Rho guanine nucleotide exchange factor (GEF) 17
ENSG00000134030	13.7233	37.2471	-1,51877448458522	1.39717e-09	CTIF	CBP80/20-dependent translation initiation factor
ENSG00000145808	3.62038	9.4701	-1,51968388726936	0.000472779	ADAMTS19	ADAM metallopeptidase with thrombospondin type 1 motif, 19
ENSG00000140443	4.13961	12.104	-1,52047052555682	2.00616e-09	IGF1R	insulin-like growth factor 1 receptor
ENSG00000168306	3.74012	8.86961	-1,52094641686468	0.00767086	ACOX2	acyl-CoA oxidase 2, branched chain
ENSG00000136059	1.68908	6.70447	-1,52129767521232	0.0112689	VILL	villin-like
ENSG00000144857	1.59114	4.7464	-1,52206818718114	0.0330341	BOC	Boc homolog (mouse)
ENSG00000137845	69.7614	196.426	-1,52207710164061	2.26797e-10	ADAM10	ADAM metallopeptidase domain 10
ENSG00000154237	3.90299	10.9295	-1,52223827134551	3.48521e-06	LRRK1	leucine-rich repeat kinase 1
ENSG00000157613	110.357	334.679	-1,52491622675621	6.7769e-10	CREB3L1	cAMP responsive element binding protein 3-like 1
ENSG00000153944	3.43901	11.0373	-1,52809750879379	0.000514291	MSI2	musashi homolog 2 (Drosophila)
ENSG00000013297	33.5172	95.054	-1,53081714793041	4.61263e-09	CLDN11	claudin 11
ENSG00000196586	4.7069	14.7542	-1,53211537063898	4.99084e-07	MYO6	myosin VI
ENSG00000101974	4.6444	16.6421	-1,53238832415109	1.00217e-05	ATP11C	ATPase, class VI, type 11C
ENSG00000078804	12.8802	34.6577	-1,53574274703002	3.25575e-09	TP53INP2	tumor protein p53 inducible nuclear protein 2
ENSG00000134294	56.6919	168.156	-1,53603979349474	1.95713e-09	SLC38A2	solute carrier family 38, member 2
ENSG00000183160	2.33398	6.75823	-1,53624753574385	0.00130597	TMEM119	transmembrane protein 119
ENSG00000197442	10.1238	32.1905	-1,53692602009551	1.35222e-08	MAP3K5	mitogen-activated protein kinase kinase kinase 5
ENSG00000168077	35.5026	104.464	-1,53750297528782	6.44552e-10	SCARA3	scavenger receptor class A, member 3
ENSG00000147202	2.49576	6.77393	-1,53789253359152	7.14655e-06	DIAPH2	diaphanous homolog 2 (Drosophila)
ENSG00000150457	22.4114	64.5763	-1,54049717784707	6.12429e-10	LATS2	LATS, large tumor suppressor, homolog 2 (Drosophila)
ENSG00000143867	3.31007	11.367	-1,54308217953835	1.73988e-05	OSR1	odd-skipped related 1 (Drosophila)
ENSG00000152284	4.6201	12.9756	-1,54341620534203	7.82311e-06	TCF7L1	transcription factor 7-like 1 (T-cell specific, HMG-box)
ENSG00000125378	1.13514	3.52043	-1,54362116609517	0.0265839	BMP4	bone morphogenetic protein 4
ENSG00000151617	7.21324	21.1216	-1,54410271840346	2.31881e-05	EDNRA	endothelin receptor type A
ENSG00000117906	8.39753	25.7744	-1,54429526343708	1.10917e-06	RCN2	reticulocalbin 2, EF-hand calcium binding domain
ENSG00000072422	13.6185	29.8002	-1,54446469744065	1.32297e-05	RHOBTB1	Rho-related BTB domain containing 1
ENSG00000177425	3.97302	11.8321	-1,54542431429288	0.000140881	PAWR	PRKC, apoptosis, WT1, regulator
ENSG00000113810	8.38218	26.1174	-1,54673527281349	1.773e-05	SMC4	structural maintenance of chromosomes 4
ENSG00000187079	21.5518	57.0735	-1,54686866516681	1.0871e-10	TEAD1	TEA domain family member 1 (SV40 transcriptional enhancer factor)
ENSG00000152465	12.4349	35.8835	-1,54767488663483	1.03525e-07	NMT2	N-myristoyltransferase 2
ENSG00000187098	4.74816	19.4441	-1,55023239834023	8.81094e-06	MITF	microphthalmia-associated transcription factor
ENSG00000130702	5.33572	15.6095	-1,55035311792828	5.10329e-05	LAMA5	laminin, alpha 5
ENSG00000161395	2.69303	8.2858	-1,55051739840468	0.00169057	PGAP3	post-GPI attachment to proteins 3
ENSG00000248905	4.88588	14.3562	-1,5511751224324	3.70555e-10	FMN1	formin 1
ENSG00000152127	33.2116	103.678	-1,55597026532289	1.11002e-10	MGAT5	mannosyl (alpha-1,6-)-glycoprotein beta-1,6-N-acetyl-glucosaminyltransferase
ENSG00000154920	2.74931	6.19833	-1,56042170872899	0.00662373	EME1	essential meiotic endonuclease 1 homolog 1 (S. pombe)
ENSG00000127990	30.2218	98.367	-1,56378493294514	3.4545e-08	SGCE	sarcoglycan, epsilon
ENSG00000038382	105.187	336.074	-1,56432977780908	1.14945e-09	TRIO	triple functional domain (PTPRF interacting)
ENSG00000163520	14.8	32.114	-1,56467692729054	3.74454e-08	FBLN2	fibulin 2
ENSG00000127564	1.94658	5.75417	-1,56636798467525	0.00923354	PKMYT1	protein kinase, membrane associated tyrosine/threonine 1
ENSG00000149571	30.8469	64.7791	-1,56646304071176	7.22078e-08	KIRREL3	kin of IRRE like 3 (Drosophila)
ENSG00000153904	47.0512	107.496	-1,56685429448409	1.037e-10	DDAH1	dimethylarginine dimethylaminohydrolase 1
ENSG00000081377	9.90063	12.3283	-1,56732561524046	5.79613e-06	CDC14B	CDC14 cell division cycle 14 homolog B (S. cerevisiae)
ENSG00000124795	13.9309	39.5211	-1,56834065213534	6.33672e-08	DEK	DEK oncogene
ENSG00000137177	11.9325	35.5027	-1,56966187014080	9.29191e-10	KIF13A	kinesin family member 13A
ENSG00000196345	1.30112	4.90776	-1,57353239272292	0.0186078	ZNF167	zinc finger protein 167
ENSG00000146263	1.97648	5.17523	-1,57398639032639	0.00291631	MMS22L	MMS22-like, DNA repair protein
ENSG00000168575	38.1598	106.42	-1,57429729971626	1.47729e-10	SLC20A2	solute carrier family 20 (phosphate transporter), member 2
ENSG00000166073	50.4215	156.469	-1,57497990934191	1.26965e-10	GPR176	G protein-coupled receptor 176
ENSG00000101003	1.65621	4.2636	-1,58011835248665	0.0431505	GINS1	GINS complex subunit 1 (Psf1 homolog)
ENSG00000213722	28.7056	90.0319	-1,58068599527874	8.31251e-09	DDAH2	dimethylarginine dimethylaminohydrolase 2
ENSG00000136274	3.34065	8.87475	-1,58182169941166	1.12761e-05	NACAD	NAC alpha domain containing
ENSG00000132329	6.16227	18.8664	-1,58218288254485	0.00118988	RAMP1	receptor (G protein-coupled) activity modifying protein 1
ENSG00000221008	17.9636	62.2095	-1,58232647599972	0.0472978	AC136698.1
ENSG00000187676	1.35981	3.01891	-1,58334462730130	0.00315904	B3GALTL	beta 1,3-galactosyltransferase-like
ENSG00000106799	8.18249	22.5859	-1,58420458354483	4.50807e-09	TGFBR1	transforming growth factor, beta receptor 1
ENSG00000185634	2.18459	6.59001	-1,58591338892272	0.000121621	SHC4	SHC (Src homology 2 domain containing) family, member 4
ENSG00000144712	1.72889	5.7918	-1,58667367093244	5.56124e-05	CAND2	cullin-associated and neddylation-dissociated 2 (putative)
ENSG00000145604	5.29043	15.7682	-1,58773853398088	0.00033343	SKP2	S-phase kinase-associated protein 2 (p45)
ENSG00000116005	17.8607	49.5888	-1,59043847860799	5.6309e-10	PCYOX1	prenylcysteine oxidase 1
ENSG00000254851	9.29407	28.7778	-1,59118759018128	8.86115e-05	RP11-109L13.1
ENSG00000109686	3.79205	5.32905	-1,59204025835294	0.000557724	SH3D19	SH3 domain containing 19
ENSG00000159164	4.14516	12.9705	-1,59455277890653	1.38629e-07	SV2A	synaptic vesicle glycoprotein 2A
ENSG00000149218	3.9481	12.3921	-1,59526064353014	1.07557e-07	ENDOD1	endonuclease domain containing 1
ENSG00000164124	5.2186	10.1238	-1,59623108809305	0.0103413	TMEM144	transmembrane protein 144
ENSG00000119711	0.941281	2.93887	-1,59679947269132	0.0240304	ALDH6A1	aldehyde dehydrogenase 6 family, member A1
ENSG00000164292	49.277	141.754	-1,59754721424396	7.05913e-11	RHOBTB3	Rho-related BTB domain containing 3
ENSG00000174428	3.31816	9.48156	-1,59762121202548	0.00102282	GTF2IRD2B	GTF2I repeat domain containing 2B
ENSG00000244486	27.7894	83.5797	-1,59804275055826	1.77465e-10	SCARF2	scavenger receptor class F, member 2
ENSG00000128872	1.43791	3.73707	-1,59931971068311	1.39318e-05	TMOD2	tropomodulin 2 (neuronal)
ENSG00000080493	4.19392	11.7211	-1,60347603757311	6.21919e-07	SLC4A4	solute carrier family 4, sodium bicarbonate cotransporter, member 4
ENSG00000021826	1.60229	3.67286	-1,60490413523137	0.0138108	CPS1	carbamoyl-phosphate synthase 1, mitochondrial
ENSG00000148175	68.5115	208.979	-1,60491674237969	1.53659e-11	STOM	stomatin
ENSG00000200237	13.127	43.0321	-1,60515574364707	0.0358204	SNORA70.1	Small nucleolar RNA SNORA70
ENSG00000226752	1.59465	4.89125	-1,6095431934624	0.00939685	RP11-27I1.2
ENSG00000138688	6.91423	27.6554	-1,61039138103608	2.46301e-09	KIAA1109	KIAA1109
ENSG00000205560	3.76771	16.4193	-1,61066435708516	2.83165e-05	CPT1B	carnitine palmitoyltransferase 1B (muscle)
ENSG00000232561	7.57728	23.9592	-1,61148979573772	2.14723e-08	GTF2IP1	general transcription factor IIi, pseudogene 1
ENSG00000172935	20.6993	66.1016	-1,61970350637499	2.51967e-10	MRGPRF	MAS-related GPR, member F
ENSG00000164104	6.10898	21.0765	-1,62255090457365	8.44916e-05	HMGB2	high-mobility group box 2
ENSG00000233369	8.01546	25.5395	-1,62322789332753	1.29683e-08	RP11-396K3.1
ENSG00000106829	12.5443	40.4976	-1,62401651146741	4.03238e-08	TLE4	transducin-like enhancer of split 4 (E(sp1) homolog, Drosophila)
ENSG00000141068	3.56801	10.0581	-1,62793801241434	8.00759e-07	KSR1	kinase suppressor of ras 1
ENSG00000139211	6.22666	19.9076	-1,63166372441004	3.75352e-07	AMIGO2	adhesion molecule with Ig-like domain 2
ENSG00000154027	30.4714	91.3218	-1,63291282038943	1.23469e-08	AK5	adenylate kinase 5
ENSG00000130529	7.62983	24.3057	-1,63604704217439	1.97542e-09	TRPM4	transient receptor potential cation channel, subfamily M, member 4
ENSG00000232157	1.29523	4.0949	-1,63641266372209	0.00857917	RP1-187N21.2
ENSG00000145012	85.7024	75.9537	-1,63721296123933	2.19424e-11	LPP	LIM domain containing preferred translocation partner in lipoma
ENSG00000166347	28.563	96.9796	-1,63806931275047	3.56165e-07	CYB5A	cytochrome b5 type A (microsomal)
ENSG00000216042	129.045	428.154	-1,63807923027848	9.10656e-08	MIR922	microRNA 922
ENSG00000165304	2.17794	7.35345	-1,63908271009027	0.00127699	MELK	maternal embryonic leucine zipper kinase
ENSG00000178996	13.8888	43.323	-1,64206821563285	3.04411e-11	SNX18	sorting nexin 18
ENSG00000166341	6.08906	18.5541	-1,64226311823510	6.14299e-11	DCHS1	dachsous 1 (Drosophila)
ENSG00000150551	27.2068	82.8188	-1,64252730946042	1.00378e-10	LYPD1	LY6/PLAUR domain containing 1
ENSG00000108691	8.8096	30.0875	-1,64308843374059	2.95134e-05	CCL2	chemokine (C-C motif) ligand 2
ENSG00000207733	47.222	156.224	-1,64441393804013	0.000553065	MIR637	microRNA 637
ENSG00000145284	1.65186	4.99162	-1,64444836911565	0.00149107	SCD5	stearoyl-CoA desaturase 5
ENSG00000254771	17.1974	53.9492	-1,64718956406165	0.00495361	RP11-50B3.1
ENSG00000196275	3.11803	8.54655	-1,64917740851709	0.000854754	GTF2IRD2	GTF2I repeat domain containing 2
ENSG00000174080	6.7606	19.922	-1,65044921690209	0.000417512	CTSF	cathepsin F
ENSG00000163017	234.756	761.906	-1,65079313692189	2.61635e-10	ACTG2	actin, gamma 2, smooth muscle, enteric
ENSG00000162337	17.8558	50.0583	-1,65375732771841	3.06674e-10	LRP5	low density lipoprotein receptor-related protein 5
ENSG00000123684	10.1147	22.7699	-1,65405704079365	2.64688e-08	LPGAT1	lysophosphatidylglycerol acyltransferase 1
ENSG00000020577	6.77336	21.9235	-1,65452882174031	5.32926e-11	SAMD4A	sterile alpha motif domain containing 4A
ENSG00000101460	20.3502	70.1252	-1,65488791792121	5.83418e-08	MAP1LC3A	microtubule-associated protein 1 light chain 3 alpha
ENSG00000164930	17.5947	54.842	-1,65674691489017	3.81188e-11	FZD6	frizzled homolog 6 (Drosophila)
ENSG00000121039	27.3592	95.5841	-1,65836896933095	4.93154e-11	RDH10	retinol dehydrogenase 10 (all-trans)
ENSG00000117394	207.221	701.509	-1,66291924546049	7.15442e-09	SLC2A1	solute carrier family 2 (facilitated glucose transporter), member 1
ENSG00000150347	13.0814	40.5786	-1,66464587951027	5.2334e-12	ARID5B	AT rich interactive domain 5B (MRF1-like)
ENSG00000071282	7.75905	25.9866	-1,66516069975542	1.29705e-05	LMCD1	LIM and cysteine-rich domains 1
ENSG00000134013	490.248	1604.96	-1,66717433395417	5.64013e-07	LOXL2	lysyl oxidase-like 2
ENSG00000117791	1.95211	8.01672	-1,66909937500817	0.0280971	MOSC2	MOCO sulphurase C-terminal domain containing 2
ENSG00000174720	4.38837	17.5427	-1,67091466820627	0.0109642	LARP7	La ribonucleoprotein domain family, member 7
ENSG00000049323	190.277	709.865	-1,67152695205880	8.79429e-09	LTBP1	latent transforming growth factor beta binding protein 1
ENSG00000112419	17.4386	38.7567	-1,67247879758305	3.68346e-11	PHACTR2	phosphatase and actin regulator 2
ENSG00000152942	9.94004	18.9401	-1,67359994944771	2.36137e-06	RAD17	RAD17 homolog (S. pombe)
ENSG00000135502	3.42513	9.70772	-1,67532159614808	0.000111717	SLC26A10	solute carrier family 26, member 10
ENSG00000186448	2.26434	6.39412	-1,67568131505195	0.000224635	ZNF197	zinc finger protein 197
ENSG00000254122	2.63029	8.66562	-1,67868231552159	8.96589e-07	PCDHGB7	protocadherin gamma subfamily B, 7
ENSG00000049089	3.71419	5.42474	-1,67917891814191	0.0148294	COL9A2	collagen, type IX, alpha 2
ENSG00000144031	1.26879	4.14081	-1,68011040878321	0.042413	ANKRD53	ankyrin repeat domain 53
ENSG00000164291	5.74972	17.6842	-1,68065112249450	1.60166e-06	ARSK	arylsulfatase family, member K
ENSG00000198121	57.9874	190.422	-1,68116654042068	3.695e-12	LPAR1	lysophosphatidic acid receptor 1
ENSG00000155893	0.979517	5.28489	-1,68383671201139	0.0265375	ACPL2	acid phosphatase-like 2
ENSG00000112029	0.989864	3.32324	-1,68491113425744	0.015375	FBXO5	F-box protein 5
ENSG00000112902	16.0937	28.191	-1,68530802527612	2.71117e-11	SEMA5A	sema domain, seven thrombospondin repeats (type 1 and type 1-like), transmembrane domain (TM) and short cytoplasmic domain, (semaphorin) 5A
ENSG00000042062	23.4004	89.3157	-1,68612230414939	2.87965e-12	FAM65C	family with sequence similarity 65, member C
ENSG00000166352	2.04633	8.64825	-1,68704573939775	0.0233745	C11orf74	chromosome 11 open reading frame 74
ENSG00000136048	10.8985	36.0365	-1,68785233749395	4.76844e-11	DRAM1	DNA-damage regulated autophagy modulator 1
ENSG00000255390	3.08034	10.6976	-1,69114064210225	0.00579161	RP11-732A19.5
ENSG00000132669	27.1562	85.3497	-1,69276095917932	7.41024e-12	RIN2	Ras and Rab interactor 2
ENSG00000139793	7.22399	30.3752	-1,69367248592854	1.40882e-09	MBNL2	muscleblind-like 2 (Drosophila)
ENSG00000083290	1.70829	5.65354	-1,69433651418074	1.69031e-05	ULK2	unc-51-like kinase 2 (C. elegans)
ENSG00000112183	6.23869	19.3628	-1,69661699256341	2.33643e-05	RBM24	RNA binding motif protein 24
ENSG00000214018	1.57407	5.39899	-1,69706647779852	0.0199693	RRM2P3	ribonucleotide reductase M2 polypeptide pseudogene 3
ENSG00000086991	1.16787	3.45612	-1,69945890175592	0.00358623	NOX4	NADPH oxidase 4
ENSG00000105808	13.9873	48.142	-1,69979253790379	1.4314e-06	RASA4	RAS p21 protein activator 4
ENSG00000255090	8.03989	42.1474	-1,70035561615782	0.00821342	RP11-820L6.1
ENSG00000146670	4.50428	11.2868	-1,70038806671710	0.000507436	CDCA5	cell division cycle associated 5
ENSG00000188153	6.93649	22.5883	-1,70108915810991	7.19783e-09	COL4A5	collagen, type IV, alpha 5
ENSG00000140937	18.5641	83.7553	-1,70357489763202	8.13935e-12	CDH11	cadherin 11, type 2, OB-cadherin (osteoblast)
ENSG00000140386	0.738369	2.42432	-1,70497719669424	0.00184117	SCAPER	S-phase cyclin A-associated protein in the ER
ENSG00000106484	11.2927	22.3464	-1,70687391009448	5.57988e-06	MEST	mesoderm specific transcript homolog (mouse)
ENSG00000140396	5.26292	14.6833	-1,70696405855959	2.75124e-07	NCOA2	nuclear receptor coactivator 2
ENSG00000096696	2.81344	8.87833	-1,71384285233694	1.87566e-09	DSP	desmoplakin
ENSG00000118412	1.20488	2.84372	-1,71454344507994	0.00196976	CASP8AP2	caspase 8 associated protein 2
ENSG00000169432	2.90791	8.46986	-1,71460880165981	4.71907e-09	SCN9A	sodium channel, voltage-gated, type IX, alpha subunit
ENSG00000155816	8.82443	20.4419	-1,71658718257633	5.48292e-08	FMN2	formin 2
ENSG00000142798	55.5491	157.736	-1,71699243562198	1.27497e-10	HSPG2	heparan sulfate proteoglycan 2
ENSG00000164649	2.09571	7.33395	-1,72127007206915	0.00539252	CDCA7L	cell division cycle associated 7-like
ENSG00000084636	75.3855	226.963	-1,72400988189258	2.7445e-12	COL16A1	collagen, type XVI, alpha 1
ENSG00000079102	3.95038	13.0769	-1,72525860338452	0.0056159	RUNX1T1	runt-related transcription factor 1; translocated to, 1 (cyclin D-related)
ENSG00000152422	0.841028	2.98056	-1,73128865326454	0.0449482	XRCC4	X-ray repair complementing defective repair in Chinese hamster cells 4
ENSG00000095539	3.07344	10.8632	-1,73250562330486	0.000313719	SEMA4G	sema domain, immunoglobulin domain (Ig), transmembrane domain (TM) and short cytoplasmic domain, (semaphorin) 4G
ENSG00000137752	9.03694	39.199	-1,73302864522373	1.36959e-05	CASP1	caspase 1, apoptosis-related cysteine peptidase (interleukin 1, beta, convertase)
ENSG00000166532	1.55216	7.39455	-1,73324378715274	0.000488688	RIMKLB	ribosomal modification protein rimK-like family member B
ENSG00000148677	1.43094	4.90215	-1,73385717331052	0.003406	ANKRD1	ankyrin repeat domain 1 (cardiac muscle)
ENSG00000181513	1.27638	4.58704	-1,73769130975021	0.0049057	ACBD4	acyl-CoA binding domain containing 4
ENSG00000237036	3.5917	13.8955	-1,74056432255811	0.0136662	RP11-192P3.1
ENSG00000152804	2.13717	7.6109	-1,7434586699625	0.00144902	HHEX	hematopoietically expressed homeobox
ENSG00000229807	16.0396	39.2585	-1,74347490259212	3.20063e-12	XIST	X (inactive)-specific transcript (non-protein coding)
ENSG00000151067	1.12369	3.84483	-1,74514188306892	1.18978e-05	CACNA1C	calcium channel, voltage-dependent, L type, alpha 1C subunit
ENSG00000132640	18.718	82.8246	-1,74833159042363	4.00553e-12	BTBD3	BTB (POZ) domain containing 3
ENSG00000074181	15.7602	53.7509	-1,74977563460305	7.373e-12	NOTCH3	notch 3
ENSG00000238757	106.78	372.537	-1,75021558854798	1.1251e-07	AL031431.1
ENSG00000072195	25.1648	69.4001	-1,75052595835504	2.21757e-10	SPEG	SPEG complex locus
ENSG00000142892	5.29722	16.7326	-1,75150531981732	4.60926e-06	PIGK	phosphatidylinositol glycan anchor biosynthesis, class K
ENSG00000177707	27.1113	87.9981	-1,7517774493285	1.38271e-11	PVRL3	poliovirus receptor-related 3
ENSG00000138738	1.40429	5.77998	-1,75629259774300	0.00907373	PRDM5	PR domain containing 5
ENSG00000207650	23.0493	77.0847	-1,75909658701145	0.0069492	MIR570	microRNA 570
ENSG00000179750	0.857212	3.26558	-1,75927468265720	0.0302791	APOBEC3B	apolipoprotein B mRNA editing enzyme, catalytic polypeptide-like 3B
ENSG00000083720	8.80525	28.7624	-1,76001147678153	8.6329e-06	OXCT1	3-oxoacid CoA transferase 1
ENSG00000056998	4.13236	14.8272	-1,76109891305614	1.26647e-05	GYG2	glycogenin 2
ENSG00000135835	1.92271	7.53079	-1,76133408986671	0.000164051	KIAA1614	KIAA1614
ENSG00000189337	5.12616	17.0336	-1,76406521902390	1.54171e-07	KAZN	kazrin, periplakin interacting protein
ENSG00000255248	23.5005	86.0817	-1,76873494599845	6.9955e-12	RP11-166D19.1
ENSG00000163815	7.46103	24.9692	-1,76888754974896	5.68542e-05	CLEC3B	C-type lectin domain family 3, member B
ENSG00000009413	1.69208	7.75293	-1,77268247360191	6.45374e-09	REV3L	REV3-like, catalytic subunit of DNA polymerase zeta (yeast)
ENSG00000088881	1.15016	3.3195	-1,77310008898636	0.0440172	EBF4	early B-cell factor 4
ENSG00000083123	4.34427	16.3882	-1,77679514745068	0.000490411	BCKDHB	branched chain keto acid dehydrogenase E1, beta polypeptide
ENSG00000245958	18.3847	76.0299	-1,77778658826689	2.95761e-07	RP11-33B1.1
ENSG00000234555	3.22397	11.4127	-1,77803758616497	0.0171372	RP11-74C13.4
ENSG00000116117	3.8445	10.6987	-1,77949847411486	2.41795e-07	PARD3B	par-3 partitioning defective 3 homolog B (C. elegans)
ENSG00000142945	6.89274	15.753	-1,78023908278339	2.08758e-06	KIF2C	kinesin family member 2C
ENSG00000196814	1.34281	4.42311	-1,78050050974955	0.00127413	FAM125B	family with sequence similarity 125, member B
ENSG00000256309	4.08341	14.4808	-1,78083584573047	2.6488e-05	AC009469.1
ENSG00000113083	117.506	412.154	-1,78190158417709	2.26057e-12	LOX	lysyl oxidase
ENSG00000229694	2.5619	11.5466	-1,78208086749812	0.0352894	RP11-305L7.6
ENSG00000172638	348.351	1247.94	-1,78210943428337	3.12049e-11	EFEMP2	EGF containing fibulin-like extracellular matrix protein 2
ENSG00000070404	24.4716	88.0851	-1,78261891969831	1.43968e-12	FSTL3	follistatin-like 3 (secreted glycoprotein)
ENSG00000069011	17.1115	61.7225	-1,79080334961734	4.93154e-11	PITX1	paired-like homeodomain 1
ENSG00000235863	0.953013	3.51359	-1,79098608640215	0.0162218	B3GALT4	UDP-Gal:betaGlcNAc beta 1,3-galactosyltransferase, polypeptide 4
ENSG00000253910	0.821252	2.88086	-1,79408568590683	0.000509313	PCDHGB2	protocadherin gamma subfamily B, 2
ENSG00000115163	2.5692	9.42936	-1,79427590761850	0.000564926	CENPA	centromere protein A
ENSG00000162607	1.55718	5.06211	-1,79441563704524	0.000148379	USP1	ubiquitin specific peptidase 1
ENSG00000173406	0.952657	5.04537	-1,79489039646962	0.00792168	DAB1	disabled homolog 1 (Drosophila)
ENSG00000120885	103.058	390.152	-1,79619212991841	2.18783e-13	CLU	clusterin
ENSG00000173531	1.78636	6.52157	-1,79638635240791	0.016239	MST1	macrophage stimulating 1 (hepatocyte growth factor-like)
ENSG00000236654	14.2075	51.7585	-1,79783397114437	0.00121184	AC079780.3
ENSG00000176868	3.27183	11.6449	-1,79815169294225	0.00297023	AL358781.1
ENSG00000102384	0.623393	3.03479	-1,80498899581989	0.0221707	CENPI	centromere protein I
ENSG00000165572	1.26918	4.54073	-1,80542378010581	0.000158977	KBTBD6	kelch repeat and BTB (POZ) domain containing 6
ENSG00000088280	5.14243	22.0188	-1,80978242513717	7.0059e-07	ASAP3	ArfGAP with SH3 domain, ankyrin repeat and PH domain 3
ENSG00000095303	69.0005	229.694	-1,81370302017118	4.72085e-13	PTGS1	prostaglandin-endoperoxide synthase 1 (prostaglandin G/H synthase and cyclooxygenase)
ENSG00000129353	25.9158	95.8228	-1,81537317335757	1.59148e-13	SLC44A2	solute carrier family 44, member 2
ENSG00000130635	43.9462	154.948	-1,81798002949915	5.82366e-13	COL5A1	collagen, type V, alpha 1
ENSG00000105519	1.57348	5.62666	-1,82181376432276	0.00145568	CAPS	calcyphosine
ENSG00000119138	1.41438	5.22399	-1,82448003115877	2.43758e-06	KLF9	Kruppel-like factor 9
ENSG00000004776	67.7877	248.701	-1,82704473455024	3.49488e-13	HSPB6	heat shock protein, alpha-crystallin-related, B6
ENSG00000087842	1.2972	4.58496	-1,82907562395248	0.024845	PIR	pirin (iron-binding nuclear protein)
ENSG00000238244	2.24584	8.49581	-1,83303147982282	0.0001176	GABARAPL3	GABA(A) receptors associated protein like 3, pseudogene
ENSG00000139112	65.8673	265.836	-1,83573152506503	5.45305e-14	GABARAPL1	GABA(A) receptor-associated protein like 1
ENSG00000002745	21.5242	78.0987	-1,83713141430076	2.35384e-12	WNT16	wingless-type MMTV integration site family, member 16
ENSG00000089472	2.84027	13.5404	-1,83818418372945	5.69598e-07	HEPH	hephaestin
ENSG00000127241	3.79472	13.562	-1,84207712118709	3.73228e-05	MASP1	mannan-binding lectin serine peptidase 1 (C4/C2 activating component of Ra-reactive factor)
ENSG00000102893	2.49322	9.3072	-1,84353528813922	4.14418e-09	PHKB	phosphorylase kinase, beta
ENSG00000163430	274.647	978.419	-1,84617958753974	2.71965e-10	FSTL1	follistatin-like 1
ENSG00000204314	1.68625	7.7056	-1,84712023588994	0.0134528	PRRT1	proline-rich transmembrane protein 1
ENSG00000145020	2.10669	9.05173	-1,85437069792454	0.00113292	AMT	aminomethyltransferase
ENSG00000112144	0.995671	3.66974	-1,85527555547736	1.02128e-05	ICK	intestinal cell (MAK-like) kinase
ENSG00000013810	8.59024	29.8926	-1,8560776458607	9.55783e-07	TACC3	transforming, acidic coiled-coil containing protein 3
ENSG00000236051	17.1979	65.1651	-1,85691105271875	1.68556e-05	RP11-226E21.3
ENSG00000115183	2.83279	10.186	-1,85978156158922	1.05213e-10	TANC1	tetratricopeptide repeat, ankyrin repeat and coiled-coil containing 1
ENSG00000091656	11.0225	23.4188	-1,85984058123692	5.05276e-07	ZFHX4	zinc finger homeobox 4
ENSG00000082512	1.75794	7.04407	-1,86167944770554	4.62951e-05	TRAF5	TNF receptor-associated factor 5
ENSG00000077684	11.2028	15.9989	-1,86331635539687	3.03376e-08	PHF17	PHD finger protein 17
ENSG00000099864	0.768391	2.77133	-1,86513711983544	0.00631943	PALM	paralemmin
ENSG00000173482	6.01011	22.1962	-1,8656531556128	4.89454e-12	PTPRM	protein tyrosine phosphatase, receptor type, M
ENSG00000186567	1.17332	4.34509	-1,86697131813215	0.00316688	CEACAM19	carcinoembryonic antigen-related cell adhesion molecule 19
ENSG00000150764	4.49601	9.32408	-1,86784737109473	2.11415e-08	DIXDC1	DIX domain containing 1
ENSG00000170801	3.63477	13.3665	-1,86879043266386	2.86255e-07	HTRA3	HtrA serine peptidase 3
ENSG00000134247	2.41756	8.26888	-1,86884123745874	1.96851e-08	PTGFRN	prostaglandin F2 receptor negative regulator
ENSG00000047410	9.27461	34.7264	-1,87286966125244	2.12407e-10	TPR	translocated promoter region (to activated MET oncogene)
ENSG00000176435	1.92082	7.88168	-1,87296229869331	0.00155924	CLEC14A	C-type lectin domain family 14, member A
ENSG00000169439	22.891	83.6553	-1,87336654646825	8.46672e-11	SDC2	syndecan 2
ENSG00000122035	2.26994	8.63486	-1,87458375980994	0.017998	RASL11A	RAS-like, family 11, member A
ENSG00000004777	0.595264	2.17208	-1,87733879456037	0.0028357	ARHGAP33	Rho GTPase activating protein 33
ENSG00000139200	5.34946	17.7089	-1,88321883358366	1.45972e-05	C12orf53	chromosome 12 open reading frame 53
ENSG00000094804	1.88465	4.43083	-1,88681044027549	0.000927565	CDC6	cell division cycle 6 homolog (S. cerevisiae)
ENSG00000235471	1.29464	4.87636	-1,88785812876083	0.000513385	AL033532.1
ENSG00000107679	2.10238	10.6185	-1,88834208304037	4.73669e-06	PLEKHA1	pleckstrin homology domain containing, family A (phosphoinositide binding specific) member 1
ENSG00000090006	18.5186	64.3755	-1,88909270736879	1.11154e-13	LTBP4	latent transforming growth factor beta binding protein 4
ENSG00000128791	18.7895	71.2245	-1,88910020689123	1.71518e-14	TWSG1	twisted gastrulation homolog 1 (Drosophila)
ENSG00000166510	4.4936	16.9356	-1,88965001289408	9.14865e-11	CCDC68	coiled-coil domain containing 68
ENSG00000166402	1.61727	5.67635	-1,89299361554091	1.67906e-06	TUB	tubby homolog (mouse)
ENSG00000214544	0.860951	3.0584	-1,89873808890431	0.00860733	GTF2IRD2P1	GTF2I repeat domain containing 2 pseudogene 1
ENSG00000129422	0.320339	5.81896	-1,89877388446787	0.0287361	MTUS1	microtubule associated tumor suppressor 1
ENSG00000135473	1.5315	5.72342	-1,89896939357035	1.41839e-06	PAN2	PAN2 poly(A) specific ribonuclease subunit homolog (S. cerevisiae)
ENSG00000202042	160.67	615.531	-1,89944889006169	1.10307e-10	SNORD49B	small nucleolar RNA, C/D box 49B
ENSG00000174738	4.45054	17.8031	-1,90184965711800	4.94066e-08	NR1D2	nuclear receptor subfamily 1, group D, member 2
ENSG00000182568	2.59055	14.63	-1,90277633064812	0.000179327	SATB1	SATB homeobox 1
ENSG00000160094	4.43208	19.8086	-1,90397639449015	3.30255e-06	ZNF362	zinc finger protein 362
ENSG00000104218	2.97173	10.5934	-1,91092261599650	4.74825e-07	CSPP1	centrosome and spindle pole associated protein 1
ENSG00000176018	1.99036	8.55913	-1,91153326197412	0.000270559	LYSMD3	LysM, putative peptidoglycan-binding, domain containing 3
ENSG00000175745	30.2113	109.186	-1,91256832090475	1.27652e-12	NR2F1	nuclear receptor subfamily 2, group F, member 1
ENSG00000081853	3.95569	14.2039	-1,91334186853789	2.22523e-08	PCDHG@	protocadherin gamma cluster
ENSG00000133687	13.9209	49.1933	-1,91678407234874	5.97e-14	TMTC1	transmembrane and tetratricopeptide repeat containing 1
ENSG00000162512	35.3	124.789	-1,91842575281752	2.67321e-14	SDC3	syndecan 3
ENSG00000076382	1.13249	4.67206	-1,91854771617459	8.4413e-05	SPAG5	sperm associated antigen 5
ENSG00000172167	3.72934	9.31855	-1,91868170526252	0.00781154	MTBP	Mdm2, transformed 3T3 cell double minute 2, p53 binding protein (mouse) binding protein, 104kDa
ENSG00000105974	203.285	783.072	-1,92191181393164	4.50697e-13	CAV1	caveolin 1, caveolae protein, 22kDa
ENSG00000188167	0.669978	2.60884	-1,92526698879110	0.00100444	TMPPE	transmembrane protein with metallophosphoesterase domain
ENSG00000197093	7.96336	30.7422	-1,92688087695911	2.42072e-08	GAL3ST4	galactose-3-O-sulfotransferase 4
ENSG00000121716	2.8017	14.1092	-1,92786567024524	6.96413e-05	PILRB	paired immunoglobin-like type 2 receptor beta
ENSG00000254109	2.10298	8.61829	-1,92893722920189	0.00478984	CTD-3107M8.4
ENSG00000135480	1.21976	4.8042	-1,93019867703399	0.00281139	KRT7	keratin 7
ENSG00000159259	0.904857	3.36564	-1,93195703774203	0.0101557	CHAF1B	chromatin assembly factor 1, subunit B (p60)
ENSG00000213398	3.52496	13.5696	-1,93315314226191	2.04989e-06	LCAT	lecithin-cholesterol acyltransferase
ENSG00000231007	1.30831	5.23603	-1,93472224633844	0.00458651	CDC20P1	cell division cycle 20 homolog (S. cerevisiae) pseudogene 1
ENSG00000235261	2.14869	8.55999	-1,93488524407563	0.00972817	RP11-949J7.5
ENSG00000126778	4.20101	16.8333	-1,93533425415539	3.13433e-09	SIX1	SIX homeobox 1
ENSG00000134986	15.7566	59.8996	-1,93542138997473	4.11476e-11	C5orf13	chromosome 5 open reading frame 13
ENSG00000049246	0.956565	3.02884	-1,93547652242355	0.000579463	PER3	period homolog 3 (Drosophila)
ENSG00000172986	1.8722	7.03509	-1,93855391095479	0.00123037	GXYLT2	glucoside xylosyltransferase 2
ENSG00000115594	14.2118	46.3058	-1,94212271099804	5.05346e-14	IL1R1	interleukin 1 receptor, type I
ENSG00000152527	2.26841	5.21598	-1,94288060760097	0.000159017	PLEKHH2	pleckstrin homology domain containing, family H (with MyTH4 domain) member 2
ENSG00000122862	2.34423	9.57215	-1,94360228448607	0.000552417	SRGN	serglycin
ENSG00000176890	13.0249	49.7736	-1,94379559205300	3.00889e-09	TYMS	thymidylate synthetase
ENSG00000185565	0.8234	4.04529	-1,94839460723827	0.0404687	LSAMP	limbic system-associated membrane protein
ENSG00000146674	168.74	730.307	-1,94857270039960	3.91208e-12	IGFBP3	insulin-like growth factor binding protein 3
ENSG00000223298	15.613	62.8637	-1,95275801112697	0.00404269	Y_RNA.735	Y RNA
ENSG00000170542	0.660282	2.65115	-1,95303477101313	0.000586695	SERPINB9	serpin peptidase inhibitor, clade B (ovalbumin), member 9
ENSG00000227001	1.73873	7.08861	-1,95411408540878	0.0170475	RP11-293F5.2
ENSG00000120820	3.02681	12.1067	-1,95858137610506	2.68075e-06	GLT8D2	glycosyltransferase 8 domain containing 2
ENSG00000251562	16.8087	66.2545	-1,96133017586239	1.83255e-15	MALAT1	metastasis associated lung adenocarcinoma transcript 1 (non-protein coding)
ENSG00000174099	33.9973	103.423	-1,96159103899908	4.26954e-14	MSRB3	methionine sulfoxide reductase B3
ENSG00000149451	12.0791	43.5765	-1,96363463188463	2.16798e-12	ADAM33	ADAM metallopeptidase domain 33
ENSG00000178202	8.31325	29.9606	-1,96825386123793	1.29996e-10	KDELC2	KDEL (Lys-Asp-Glu-Leu) containing 2
ENSG00000172954	7.28541	12.5858	-1,96839721302497	2.80859e-07	LCLAT1	lysocardiolipin acyltransferase 1
ENSG00000184304	3.3385	11.7907	-1,96865680007329	1.29483e-07	PRKD1	protein kinase D1
ENSG00000253537	1.29768	5.22037	-1,96953425307769	1.02651e-06	PCDHGA7	protocadherin gamma subfamily A, 7
ENSG00000165633	2.25349	8.92964	-1,96983339422601	5.77854e-06	C10orf72	chromosome 10 open reading frame 72
ENSG00000169604	61.511	190.486	-1,97289220620297	3.70928e-15	ANTXR1	anthrax toxin receptor 1
ENSG00000151849	1.12122	5.85516	-1,97422000336743	0.000608047	CENPJ	centromere protein J
ENSG00000079819	20.1881	92.5975	-1,97447680347955	6.7568e-15	EPB41L2	erythrocyte membrane protein band 4.1-like 2
ENSG00000076003	2.34602	8.61751	-1,97582681060099	2.24859e-05	MCM6	minichromosome maintenance complex component 6
ENSG00000183691	5.19014	20.821	-1,97794915244040	1.45314e-08	NOG	noggin
ENSG00000063660	92.3418	356.406	-1,97942484713200	4.99687e-14	GPC1	glypican 1
ENSG00000228903	1.87547	7.00798	-1,98058068215434	0.00054146	AC004985.13
ENSG00000108840	8.14325	33.4432	-1,98623480628558	1.017e-14	HDAC5	histone deacetylase 5
ENSG00000136425	0.843865	3.51537	-1,98676596912154	0.0103506	CIB2	calcium and integrin binding family member 2
ENSG00000242001	102.995	414.264	-1,98745554667334	2.65783e-10	GS1-388B5.1
ENSG00000168497	3.09894	12.5516	-1,98992745205230	9.06657e-09	SDPR	serum deprivation response
ENSG00000118473	24.838	68.4974	-1,99347592475421	1.0999e-13	SGIP1	SH3-domain GRB2-like (endophilin) interacting protein 1
ENSG00000183722	13.3422	51.8626	-1,99556664431849	6.33172e-13	LHFP	lipoma HMGIC fusion partner
ENSG00000187800	15.7196	59.3066	-1,99589567693549	3.45855e-14	PEAR1	platelet endothelial aggregation receptor 1
ENSG00000110900	0.762274	2.83696	-1,99623516912453	0.0112977	TSPAN11	tetraspanin 11
ENSG00000178999	2.1938	9.21504	-1,99704618523364	0.000728173	AURKB	aurora kinase B
ENSG00000091986	37.7008	155.893	-2,00356020015884	1.40844e-15	CCDC80	coiled-coil domain containing 80
ENSG00000242498	1.49336	6.1222	-2,00389264509756	2.64707e-05	C15orf38	chromosome 15 open reading frame 38
ENSG00000145861	0.684662	2.87141	-2,0057123199721	0.00417331	C1QTNF2	C1q and tumor necrosis factor related protein 2
ENSG00000117399	4.43921	21.899	-2,00752236862711	4.30779e-06	CDC20	cell division cycle 20 homolog (S. cerevisiae)
ENSG00000104936	15.903	71.4607	-2,00816078830152	1.92702e-14	DMPK	dystrophia myotonica-protein kinase
ENSG00000142102	3.37908	13.454	-2,00830762370486	5.58286e-07	ATHL1	ATH1, acid trehalase-like 1 (yeast)
ENSG00000170153	1.06467	4.19084	-2,01645165186014	0.00105941	RNF150	ring finger protein 150
ENSG00000010626	3.04949	11.6727	-2,01656115460623	0.000101567	LRRC23	leucine rich repeat containing 23
ENSG00000146426	1.18889	6.1915	-2,01748860407554	0.000658937	TIAM2	T-cell lymphoma invasion and metastasis 2
ENSG00000001461	22.4267	78.0526	-2,01778176241673	2.36209e-15	NIPAL3	NIPA-like domain containing 3
ENSG00000128602	1.17732	4.81083	-2,01824629858835	0.000551328	SMO	smoothened homolog (Drosophila)
ENSG00000198919	1.41208	5.15093	-2,01917304390269	0.000794099	DZIP3	DAZ interacting protein 3, zinc finger
ENSG00000213416	0.742707	3.05441	-2,02118032160775	0.0459174	KRTAP4-12	keratin associated protein 4-12
ENSG00000168453	1.87787	5.22035	-2,02981961605973	0.00070944	HR	hairless homolog (mouse)
ENSG00000175455	10.4373	39.003	-2,03073843669216	1.12542e-10	CCDC14	coiled-coil domain containing 14
ENSG00000180340	13.9088	58.8149	-2,03284183823284	7.38852e-14	FZD2	frizzled homolog 2 (Drosophila)
ENSG00000164220	1.18779	5.82967	-2,03611265166592	6.71435e-05	F2RL2	coagulation factor II (thrombin) receptor-like 2
ENSG00000076344	1.24021	3.7627	-2,04138684354898	0.00975389	RGS11	regulator of G-protein signaling 11
ENSG00000154511	3.36133	13.8623	-2,04263611062449	1.02494e-07	FAM69A	family with sequence similarity 69, member A
ENSG00000137070	4.29129	18.1733	-2,04467461120073	1.02651e-06	IL11RA	interleukin 11 receptor, alpha
ENSG00000204219	3.12269	12.3413	-2,04554333458847	1.66858e-05	TCEA3	transcription elongation factor A (SII), 3
ENSG00000176771	9.24286	33.9916	-2,04616892283775	1.38252e-12	NCKAP5	NCK-associated protein 5
ENSG00000137501	4.55893	27.4901	-2,04780280158540	9.65644e-08	SYTL2	synaptotagmin-like 2
ENSG00000126562	1.56637	6.1294	-2,05153543202425	8.15855e-07	WNK4	WNK lysine deficient protein kinase 4
ENSG00000087116	26.8546	103.012	-2,05255846357618	1.37539e-15	ADAMTS2	ADAM metallopeptidase with thrombospondin type 1 motif, 2
ENSG00000159251	1.71317	7.31112	-2,05402163390943	5.07419e-07	ACTC1	actin, alpha, cardiac muscle 1
ENSG00000249098	1.16783	5.22981	-2,05508772641655	0.0207763	RP11-39E3.4
ENSG00000180891	4.36785	18.6652	-2,05629389362996	1.62002e-08	CUEDC1	CUE domain containing 1
ENSG00000105339	18.6364	80.5946	-2,058401479571	7.30027e-15	DENND3	DENN/MADD domain containing 3
ENSG00000119943	5.13003	16.04	-2,05874879173686	3.94846e-05	PYROXD2	pyridine nucleotide-disulphide oxidoreductase domain 2
ENSG00000092529	0.651247	2.60957	-2,05947552797395	0.00537512	CAPN3	calpain 3, (p94)
ENSG00000119969	0.637938	3.01388	-2,06595208619789	0.00359545	HELLS	helicase, lymphoid-specific
ENSG00000244193	1.57115	6.69142	-2,06909761608402	0.014498	RP11-379K17.5
ENSG00000053254	3.5831	15.4564	-2,07009424598558	1.4059e-14	FOXN3	forkhead box N3
ENSG00000118596	0.651937	2.60783	-2,07090014329291	0.00242195	SLC16A7	solute carrier family 16, member 7 (monocarboxylic acid transporter 2)
ENSG00000204366	0.895938	3.65296	-2,07922245967715	0.0112094	ZBTB12	zinc finger and BTB domain containing 12
ENSG00000106034	42.0351	155.597	-2,07983794037165	1.7353e-16	C7orf58	chromosome 7 open reading frame 58
ENSG00000162946	0.756555	3.47825	-2,08506890159201	0.000172804	DISC1	disrupted in schizophrenia 1
ENSG00000185008	0.749165	5.06151	-2,08524261282833	0.000292994	ROBO2	roundabout, axon guidance receptor, homolog 2 (Drosophila)
ENSG00000120696	0.671513	3.01666	-2,08662029280073	0.000803909	KBTBD7	kelch repeat and BTB (POZ) domain containing 7
ENSG00000139263	0.921069	3.95949	-2,08793866482660	1.89895e-05	LRIG3	leucine-rich repeats and immunoglobulin-like domains 3
ENSG00000076706	101.928	494.736	-2,09116083183008	3.01586e-16	MCAM	melanoma cell adhesion molecule
ENSG00000239521	2.66587	9.44137	-2,09546223823455	0.00399464	AC005071.4	GATS, stromal antigen 3 opposite strand (GATS), transcript variant 3, non-coding RNA
ENSG00000143971	1.45616	3.99885	-2,09767910754933	0.000927066	ETAA1	Ewing tumor-associated antigen 1
ENSG00000223989	0.826219	3.89847	-2,09908082026957	0.0401202	RP11-84A14.5
ENSG00000182253	1.47145	6.29754	-2,09940022100599	3.89705e-10	SYNM	synemin, intermediate filament protein
ENSG00000182871	15.9314	68.2147	-2,10419634858550	3.17543e-16	COL18A1	collagen, type XVIII, alpha 1
ENSG00000152049	1.28601	5.73064	-2,10798372588823	4.28182e-06	KCNE4	potassium voltage-gated channel, Isk-related family, member 4
ENSG00000005249	2.47671	8.66034	-2,10824950799443	1.10226e-05	PRKAR2B	protein kinase, cAMP-dependent, regulatory, type II, beta
ENSG00000109339	3.67338	14.6754	-2,10953555111638	0.000457094	MAPK10	mitogen-activated protein kinase 10
ENSG00000256664	2.57473	11.2483	-2,11504901185117	0.0107207	RP11-611O2.3
ENSG00000170390	1.46417	5.01874	-2,11635460215411	1.21277e-05	DCLK2	doublecortin-like kinase 2
ENSG00000166803	0.781409	3.5308	-2,11635693393621	0.00735526	KIAA0101	KIAA0101
ENSG00000252447	13.1254	67.2444	-2,11675052795589	0.00263357	snoU13.458	Small nucleolar RNA U13
ENSG00000109846	36.4567	180.251	-2,11781263823925	1.7555e-13	CRYAB	crystallin, alpha B
ENSG00000135451	0.936804	3.15924	-2,11822617554968	0.0098499	TROAP	trophinin associated protein (tastin)
ENSG00000175183	15.23	70.1638	-2,1235518603264	3.38299e-12	CSRP2	cysteine and glycine-rich protein 2
ENSG00000113578	18.2189	75.0824	-2,12657737694686	1.4907e-11	FGF1	fibroblast growth factor 1 (acidic)
ENSG00000252139	23.5519	120.565	-2,12798982786967	0.000179476	SCARNA18.2	small Cajal body-specific RNA 18
ENSG00000100162	1.51297	8.13671	-2,13103757531666	0.00569713	CENPM	centromere protein M
ENSG00000185652	5.01057	22.1145	-2,13540919554535	7.6461e-07	NTF3	neurotrophin 3
ENSG00000121310	4.57531	26.5009	-2,13684997370360	2.27337e-06	ECHDC2	enoyl CoA hydratase domain containing 2
ENSG00000050165	430.148	1955.32	-2,13712511028147	4.88081e-11	DKK3	dickkopf homolog 3 (Xenopus laevis)
ENSG00000152818	18.8067	65.8291	-2,14101293369569	4.25362e-14	UTRN	utrophin
ENSG00000164073	0.786164	3.04038	-2,14150364307343	0.0151104	MFSD8	major facilitator superfamily domain containing 8
ENSG00000111052	1.30391	5.90286	-2,14152047266197	0.00180978	LIN7A	lin-7 homolog A (C. elegans)
ENSG00000054277	5.97829	28.7558	-2,14154970718342	2.19976e-10	OPN3	opsin 3
ENSG00000225177	1.48994	6.84654	-2,14516861248780	0.0067809	RP11-390P2.4
ENSG00000243244	1.02097	4.74534	-2,14533735308344	2.31724e-05	STON1	stonin 1
ENSG00000170017	28.2024	122.988	-2,14690297008689	2.92844e-17	ALCAM	activated leukocyte cell adhesion molecule
ENSG00000182752	13.9508	61.2602	-2,14774619890438	3.85743e-17	PAPPA	pregnancy-associated plasma protein A, pappalysin 1
ENSG00000107738	10.9962	45.9311	-2,15403240385691	1.9177e-13	C10orf54	chromosome 10 open reading frame 54
ENSG00000183023	8.83905	30.7706	-2,16201967473779	2.14405e-09	SLC8A1	solute carrier family 8 (sodium/calcium exchanger), member 1
ENSG00000087589	1.44712	7.09698	-2,16700201225282	6.17895e-06	CASS4	Cas scaffolding protein family member 4
ENSG00000113721	103.237	486.4	-2,16869686545237	8.16981e-16	PDGFRB	platelet-derived growth factor receptor, beta polypeptide
ENSG00000161888	1.5419	7.51377	-2,17540837200344	0.005551	SPC24	SPC24, NDC80 kinetochore complex component, homolog (S. cerevisiae)
ENSG00000113790	1.72311	5.7525	-2,1864807411695	0.00118534	EHHADH	enoyl-CoA, hydratase/3-hydroxyacyl CoA dehydrogenase
ENSG00000104205	1.87104	8.37662	-2,18730735095988	0.000111286	SGK3	serum/glucocorticoid regulated kinase family, member 3
ENSG00000144642	5.4872	18.8853	-2,18805640184651	3.24994e-09	RBMS3	RNA binding motif, single stranded interacting protein 3
ENSG00000204941	8.34779	37.5565	-2,18939006604952	3.28717e-10	PSG5	pregnancy specific beta-1-glycoprotein 5
ENSG00000213397	5.36794	24.6859	-2,19265912260476	7.03397e-05	HAUS7	HAUS augmin-like complex, subunit 7
ENSG00000162104	5.24702	24.3852	-2,19967557779644	5.67763e-17	ADCY9	adenylate cyclase 9
ENSG00000089225	4.63438	22.9844	-2,20561011758796	3.50476e-11	TBX5	T-box 5
ENSG00000105810	6.20271	20.4918	-2,20916656922716	2.80229e-16	CDK6	cyclin-dependent kinase 6
ENSG00000138448	19.7722	98.5779	-2,21186935023314	1.48979e-17	ITGAV	integrin, alpha V (vitronectin receptor, alpha polypeptide, antigen CD51)
ENSG00000138119	29.0981	140.31	-2,21779855259755	1.03223e-16	MYOF	myoferlin
ENSG00000165480	0.500017	3.45028	-2,21917342508212	0.00704311	SKA3	spindle and kinetochore associated complex subunit 3
ENSG00000160447	0.706897	3.72089	-2,21918273930051	0.00300537	PKN3	protein kinase N3
ENSG00000142871	121.515	610.734	-2,22020339527514	4.09302e-16	CYR61	cysteine-rich, angiogenic inducer, 61
ENSG00000206190	3.89886	18.1091	-2,22040327192684	1.47904e-14	ATP10A	ATPase, class V, type 10A
ENSG00000244479	2.69751	12.6348	-2,22113174436968	0.016226	RP4-798C17.6
ENSG00000073910	2.65648	12.8704	-2,22784216668558	1.06991e-10	FRY	furry homolog (Drosophila)
ENSG00000147576	1.63637	7.13673	-2,22886233465331	0.00372773	ADHFE1	alcohol dehydrogenase, iron containing, 1
ENSG00000252609	14.742	67.355	-2,23020193531640	0.00888642	snoU13.460	Small nucleolar RNA U13
ENSG00000126016	0.947213	4.66524	-2,23867841670410	4.34401e-06	AMOT	angiomotin
ENSG00000132170	2.14692	11.9383	-2,24369139086887	1.24385e-06	PPARG	peroxisome proliferator-activated receptor gamma
ENSG00000172260	4.73348	18.5504	-2,24449947394901	5.80572e-07	NEGR1	neuronal growth regulator 1
ENSG00000163453	139.273	700.825	-2,25842124739906	8.63505e-16	IGFBP7	insulin-like growth factor binding protein 7
ENSG00000162944	1.0494	4.46851	-2,25935307755857	0.00725708	RFTN2	raftlin family member 2
ENSG00000149201	0.94999	4.90004	-2,2603114680603	0.001142	CCDC81	coiled-coil domain containing 81
ENSG00000105011	1.25693	5.7599	-2,26301506722578	0.00029003	ASF1B	ASF1 anti-silencing function 1 homolog B (S. cerevisiae)
ENSG00000198826	0.515615	2.71003	-2,27373590743777	3.36893e-05	ARHGAP11A	Rho GTPase activating protein 11A
ENSG00000224389	0.832427	3.24417	-2,27768241065968	0.0141791	C4B	complement component 4B (Chido blood group)
ENSG00000183098	1.50016	7.51298	-2,28324243456538	5.01702e-07	GPC6	glypican 6
ENSG00000254474	28.5176	147.235	-2,28422114282191	4.01069e-06	AP006284.2	microRNA 210 (MIR210), microRNA
ENSG00000146918	1.39576	9.03231	-2,28648245740633	1.67366e-07	NCAPG2	non-SMC condensin II complex, subunit G2
ENSG00000006453	3.77993	14.9287	-2,28695851976768	3.8114e-10	AC093799.1	Brain-specific angiogenesis inhibitor 1-associated protein 2-like protein 1
ENSG00000164920	0.832502	5.15019	-2,2871231025823	0.00439152	OSR2	odd-skipped related 2 (Drosophila)
ENSG00000117724	2.07668	5.42328	-2,29344648958641	7.41754e-07	CENPF	centromere protein F, 350/400kDa (mitosin)
ENSG00000162407	10.4351	58.3923	-2,29489427386519	8.16568e-16	PPAP2B	phosphatidic acid phosphatase type 2B
ENSG00000160961	0.804571	3.22691	-2,29973474923451	0.000141638	ZNF333	zinc finger protein 333
ENSG00000254445	2.32692	10.4587	-2,30048280140732	0.000120348	HSPB2	heat shock 27kDa protein 2
ENSG00000111261	0.56143	3.75396	-2,30444407469223	0.00548796	MANSC1	MANSC domain containing 1
ENSG00000134508	5.13335	25.6764	-2,31100591141722	2.83521e-15	CABLES1	Cdk5 and Abl enzyme substrate 1
ENSG00000077942	87.7666	279.263	-2,31335388208461	1.33664e-18	FBLN1	fibulin 1
ENSG00000006016	3.98439	20.6962	-2,31807385672954	1.5136e-10	CRLF1	cytokine receptor-like factor 1
ENSG00000168916	1.98991	8.45854	-2,31865097253871	4.75246e-08	ZNF608	zinc finger protein 608
ENSG00000242288	0.474275	2.311	-2,31960043153984	0.0207575	RP11-464F9.1
ENSG00000109743	1.11439	4.447	-2,32020542854481	0.00225801	BST1	bone marrow stromal cell antigen 1
ENSG00000065534	284.594	1214.86	-2,32364930753938	2.70902e-14	MYLK	myosin light chain kinase
ENSG00000060718	2.70747	22.9814	-2,32370363709484	2.03247e-14	COL11A1	collagen, type XI, alpha 1
ENSG00000145476	0.550055	3.03156	-2,32637751470468	0.000150273	CYP4V2	cytochrome P450, family 4, subfamily V, polypeptide 2
ENSG00000152767	41.2208	187.496	-2,32767573678549	2.43966e-19	FARP1	FERM, RhoGEF (ARHGEF) and pleckstrin domain protein 1 (chondrocyte-derived)
ENSG00000117318	40.5454	223.149	-2,32957078754433	4.78381e-19	ID3	inhibitor of DNA binding 3, dominant negative helix-loop-helix protein
ENSG00000221266	9.7728	57.4328	-2,33011738922542	0.00446586	AC044860.2
ENSG00000170624	1.97565	7.83832	-2,33053476007471	1.15085e-06	SGCD	sarcoglycan, delta (35kDa dystrophin-associated glycoprotein)
ENSG00000175063	3.00786	16.7508	-2,34227980518615	3.93484e-05	UBE2C	ubiquitin-conjugating enzyme E2C
ENSG00000251992	2.34592	11.7796	-2,34431591731095	0.0120984	SCARNA17	small Cajal body-specific RNA 17
ENSG00000159403	30.348	187.2	-2,34862512309990	1.60087e-19	C1R	complement component 1, r subcomponent
ENSG00000164306	0.610853	3.88649	-2,35009884346159	0.00322128	CCDC111	coiled-coil domain containing 111
ENSG00000083857	76.0264	389.362	-2,35220062828151	5.79246e-17	FAT1	FAT tumor suppressor homolog 1 (Drosophila)
ENSG00000253661	0.620833	3.89277	-2,35324338879123	0.023256	RP11-65D13.1
ENSG00000185561	0.985498	5.24666	-2,35648783133164	0.00351074	TLCD2	TLC domain containing 2
ENSG00000155760	14.1184	74.7394	-2,36368738527736	2.75308e-19	FZD7	frizzled homolog 7 (Drosophila)
ENSG00000108187	0.966716	5.29635	-2,36510452172943	0.000308244	PBLD	phenazine biosynthesis-like protein domain containing
ENSG00000137310	2.21173	11.7379	-2,36705302736163	9.816e-09	TCF19	transcription factor 19
ENSG00000173641	4.44719	32.476	-2,37017659424628	1.6994e-11	HSPB7	heat shock 27kDa protein family, member 7 (cardiovascular)
ENSG00000122786	417.658	2387.62	-2,37193463191217	1.21675e-14	CALD1	caldesmon 1
ENSG00000166448	0.395662	2.9402	-2,37463347987722	0.00878912	TMEM130	transmembrane protein 130
ENSG00000256635	5340.56	29029.1	-2,37542232963628	7.18993e-11	AC015909.1
ENSG00000121152	0.634588	3.65806	-2,37605214871756	0.00121184	NCAPH	non-SMC condensin I complex, subunit H
ENSG00000101333	1.34151	6.91809	-2,37960591541502	3.40177e-10	PLCB4	phospholipase C, beta 4
ENSG00000111729	0.9953	5.92958	-2,3827629833691	0.00998538	CLEC4A	C-type lectin domain family 4, member A
ENSG00000134201	0.525032	5.79373	-2,38744298803627	0.000921246	GSTM5	glutathione S-transferase mu 5
ENSG00000236871	0.900497	4.63396	-2,38959881021723	0.0340932	NCRNA00106	non-protein coding RNA 106
ENSG00000164099	9.95243	53.0183	-2,39866919180827	3.20224e-16	PRSS12	protease, serine, 12 (neurotrypsin, motopsin)
ENSG00000039139	1.60232	4.35413	-2,40780301924925	2.35413e-11	DNAH5	dynein, axonemal, heavy chain 5
ENSG00000143995	18.1704	89.8122	-2,41281131027198	4.56809e-16	MEIS1	Meis homeobox 1
ENSG00000180875	2.38378	13.0489	-2,41341442781044	4.31832e-13	GREM2	gremlin 2
ENSG00000170667	2.17712	11.4189	-2,41893016811812	5.52477e-10	RASA4B	RAS p21 protein activator 4B
ENSG00000147408	4.20156	23.0388	-2,42083997791589	1.34342e-10	CSGALNACT1	chondroitin sulfate N-acetylgalactosaminyltransferase 1
ENSG00000122547	1.89763	7.59506	-2,42318695325173	1.21028e-05	EEPD1	endonuclease/exonuclease/phosphatase family domain containing 1
ENSG00000228091	0.62029	3.37906	-2,423777313595	0.0366638	RP11-302K17.7
ENSG00000141401	2.31219	13.4451	-2,43272750495103	5.28867e-08	IMPA2	inositol(myo)-1(or 4)-monophosphatase 2
ENSG00000213186	1.54318	6.27097	-2,43815751853718	8.28083e-05	TRIM59	tripartite motif containing 59
ENSG00000120833	10.1631	56.3934	-2,43837091480499	3.40443e-16	SOCS2	suppressor of cytokine signaling 2
ENSG00000090530	50.7186	240.036	-2,44059479139273	1.81854e-20	LEPREL1	leprecan-like 1
ENSG00000248161	0.884286	5.29002	-2,44808074631768	0.00696825	RP11-499E18.1
ENSG00000113361	9.8681	52.4139	-2,44888836906126	1.82698e-19	CDH6	cadherin 6, type 2, K-cadherin (fetal kidney)
ENSG00000233297	0.979578	5.43671	-2,45092497813006	0.000767027	RP11-577H5.2
ENSG00000129951	2.94221	20.2029	-2,45828653388175	1.17206e-06	MIR3187	microRNA 3187
ENSG00000012171	4.86027	30.8155	-2,45837915804369	1.68288e-12	SEMA3B	sema domain, immunoglobulin domain (Ig), short basic domain, secreted, (semaphorin) 3B
ENSG00000133026	9.34448	59.8747	-2,47042330818069	2.82985e-19	MYH10	myosin, heavy chain 10, non-muscle
ENSG00000228601	6.50866	37.9484	-2,47503819652758	0.00116732	RPL39P	ribosomal protein L39 pseudogene
ENSG00000166949	32.0264	162	-2,48963089848781	1.58506e-20	SMAD3	SMAD family member 3
ENSG00000188958	1.07388	6.62637	-2,49178213313362	0.00216287	UTS2D	urotensin 2 domain containing
ENSG00000118526	4.63541	28.5577	-2,49834553379657	1.26823e-18	TCF21	transcription factor 21
ENSG00000185499	5.51603	35.2732	-2,50021255559874	2.9392e-09	MUC1	mucin 1, cell surface associated
ENSG00000198756	0.895119	4.40912	-2,50241960771254	5.80829e-08	GLT25D2	glycosyltransferase 25 domain containing 2
ENSG00000107551	2.48773	13.6134	-2,50409164347278	4.18864e-08	RASSF4	Ras association (RalGDS/AF-6) domain family member 4
ENSG00000253731	0.789229	4.53774	-2,50758744699639	3.08708e-08	PCDHGA6	protocadherin gamma subfamily A, 6
ENSG00000120156	5.45617	32.871	-2,51366681689175	1.07351e-19	TEK	TEK tyrosine kinase, endothelial
ENSG00000167900	5.1372	29.2914	-2,52572921247149	1.44883e-12	TK1	thymidine kinase 1, soluble
ENSG00000228868	1.22945	7.19644	-2,52591602085075	1.47857e-05	MYLKP1	myosin light chain kinase pseudogene 1
ENSG00000138395	1.9882	9.36005	-2,52688459320517	5.97954e-07	CDK15	cyclin-dependent kinase 15
ENSG00000111206	2.73613	20.4069	-2,52874347873681	8.3529e-12	FOXM1	forkhead box M1
ENSG00000144152	0.356094	2.593	-2,52921421319015	0.00449645	FBLN7	fibulin 7
ENSG00000168502	5.36225	45.5478	-2,53243111321361	2.14379e-19	KIAA0802	KIAA0802
ENSG00000117643	3.72457	19.6606	-2,53964925080798	1.38252e-12	MAN1C1	mannosidase, alpha, class 1C, member 1
ENSG00000236131	0.597553	3.77382	-2,54619255815927	0.0345456	MED13P1	mediator complex subunit 13 pseudogene 1
ENSG00000129195	0.650129	3.94002	-2,55000011850463	0.000864319	FAM64A	family with sequence similarity 64, member A
ENSG00000169679	1.46434	4.66251	-2,55140121119355	1.55198e-05	BUB1	budding uninhibited by benzimidazoles 1 homolog (yeast)
ENSG00000085999	1.37106	8.40541	-2,55507015732511	0.000183458	RAD54L	RAD54-like (S. cerevisiae)
ENSG00000207870	15.9558	103.976	-2,55592444845549	1.44781e-05	MIR221	microRNA 221
ENSG00000143476	1.50111	6.31036	-2,561012770032	7.54156e-06	DTL	denticleless homolog (Drosophila)
ENSG00000165072	1.85329	9.93822	-2,56871071948892	2.31313e-11	MAMDC2	MAM domain containing 2
ENSG00000154188	1.59179	11.1948	-2,57151202777381	3.44589e-09	ANGPT1	angiopoietin 1
ENSG00000255056	1.40261	8.56578	-2,57292512513021	0.00209809	BAIAP2L1	BAI1-associated protein 2-like 1
ENSG00000215791	0.321329	2.08288	-2,57702031736121	0.00162813	AL645728.2
ENSG00000224886	0.328304	2.15619	-2,58466948070599	0.0375271	RP11-119F19.4
ENSG00000147027	4.32069	26.4077	-2,58538885470034	3.42217e-19	TMEM47	transmembrane protein 47
ENSG00000238996	14.9801	91.1979	-2,58625176934573	5.23041e-06	snoU13.345	Small nucleolar RNA U13
ENSG00000013588	9.08298	50.634	-2,58729789770104	3.11453e-17	GPRC5A	G protein-coupled receptor, family C, group 5, member A
ENSG00000216829	0.692006	4.12575	-2,59688063664058	0.0162077	BX005214.1
ENSG00000139874	1.10461	6.85188	-2,59952685373447	6.49137e-10	SSTR1	somatostatin receptor 1
ENSG00000132031	1.89829	11.5827	-2,60095203565929	2.3831e-08	MATN3	matrilin 3
ENSG00000187952	6.36251	39.29	-2,60109927946616	1.383e-13	HS6ST1P1	heparan sulfate 6-O-sulfotransferase 1 pseudogene 1
ENSG00000134690	0.787933	4.91956	-2,60525558722170	4.86651e-06	CDCA8	cell division cycle associated 8
ENSG00000123080	0.461855	2.71989	-2,61355492497686	0.00111997	CDKN2C	cyclin-dependent kinase inhibitor 2C (p18, inhibits CDK4)
ENSG00000162645	1.15112	8.51079	-2,61520525414136	3.44634e-08	GBP2	guanylate binding protein 2, interferon-inducible
ENSG00000138376	1.14488	9.78298	-2,62338306685105	4.98693e-05	BARD1	BRCA1 associated RING domain 1
ENSG00000204381	17.5407	120.857	-2,62559949172572	3.5317e-21	LAYN	layilin
ENSG00000118523	152.379	986.282	-2,62745269977076	3.78158e-13	CTGF	connective tissue growth factor
ENSG00000105997	1.59108	7.09206	-2,63143842221634	0.00014923	HOXA3	homeobox A3
ENSG00000136720	14.9915	90.0947	-2,63433088636186	1.42426e-22	HS6ST1	heparan sulfate 6-O-sulfotransferase 1
ENSG00000198542	1.89588	13.097	-2,63629894617427	6.0209e-10	ITGBL1	integrin, beta-like 1 (with EGF-like repeat domains)
ENSG00000154330	2.56048	17.225	-2,63943390326325	5.53408e-10	PGM5	phosphoglucomutase 5
ENSG00000256487	6.71348	41.9416	-2,64186868734715	2.33012e-06	AL713999.8
ENSG00000111799	70.2774	413.353	-2,64513348588373	4.55288e-15	COL12A1	collagen, type XII, alpha 1
ENSG00000227558	0.480906	3.22668	-2,64894782815737	0.00435708	PGM5P2	phosphoglucomutase 5 pseudogene 2
ENSG00000204801	0.870235	5.65959	-2,64965524859511	0.018831	RP11-96J15.2
ENSG00000203706	0.586332	3.04261	-2,65099612311183	0.00991952	C1orf133	chromosome 1 open reading frame 133
ENSG00000054793	5.18422	31.7608	-2,65464806997770	1.48658e-21	ATP9A	ATPase, class II, type 9A
ENSG00000135454	0.500088	3.11474	-2,66126715211884	0.000247966	B4GALNT1	beta-1,4-N-acetyl-galactosaminyl transferase 1
ENSG00000164692	341.72	2242.45	-2,67259320939104	8.70026e-08	COL1A2	collagen, type I, alpha 2
ENSG00000101353	0.827737	3.56612	-2,67896596826722	0.00032342	C20orf132	chromosome 20 open reading frame 132
ENSG00000164418	0.706135	6.32222	-2,69365448296586	8.31619e-09	GRIK2	glutamate receptor, ionotropic, kainate 2
ENSG00000177694	1.1277	6.70199	-2,69857588977296	2.50491e-05	NAALADL2	N-acetylated alpha-linked acidic dipeptidase-like 2
ENSG00000189409	1.2018	9.66665	-2,69934721844225	0.00010518	MMP23B	matrix metallopeptidase 23B
ENSG00000078319	1.78296	12.4701	-2,70602775283152	0.0011471	PMS2P1	postmeiotic segregation increased 2 pseudogene 1
ENSG00000248993	0.458153	3.09511	-2,70927528177238	0.00940179	XXbac-BPG181M17.5	Major histocompatibility complex, class II, DM beta
ENSG00000115738	6.96349	122.664	-2,71449200349952	9.6764e-18	ID2	inhibitor of DNA binding 2, dominant negative helix-loop-helix protein
ENSG00000138380	1.10219	7.21482	-2,7187946297018	1.29048e-05	ALS2CR8	amyotrophic lateral sclerosis 2 (juvenile) chromosome region, candidate 8
ENSG00000107796	165.603	993.685	-2,72501743098782	4.79636e-18	ACTA2	actin, alpha 2, smooth muscle, aorta
ENSG00000235408	1.08148	7.11903	-2,73639667121579	0.0451782	AL080249.2	small nucleolar RNA, H/ACA box 71B (SNORA71B), small nucleolar RNA
ENSG00000075218	0.724922	4.13577	-2,74286676484479	1.28256e-05	GTSE1	G-2 and S-phase expressed 1
ENSG00000142856	1.23058	7.22203	-2,74412508644306	0.00031753	ITGB3BP	integrin beta 3 binding protein (beta3-endonexin)
ENSG00000215883	1.81817	8.99212	-2,74527902053617	3.23089e-07	CYB5RL	cytochrome b5 reductase-like
ENSG00000146966	10.6496	72.6518	-2,74538154879626	3.70963e-20	DENND2A	DENN/MADD domain containing 2A
ENSG00000108821	734.995	4885.17	-2,75328856599092	0.000229982	COL1A1	collagen, type I, alpha 1
ENSG00000087303	37.1775	250.684	-2,75640852656232	1.47544e-20	NID2	nidogen 2 (osteonidogen)
ENSG00000123485	0.650611	9.44426	-2,75725050189429	5.92425e-06	HJURP	Holliday junction recognition protein
ENSG00000137672	1.14071	5.53027	-2,75773347362519	2.14098e-07	TRPC6	transient receptor potential cation channel, subfamily C, member 6
ENSG00000139329	4.57195	31.5516	-2,76375070534407	3.01336e-17	LUM	lumican
ENSG00000089685	1.0787	11.4305	-2,76599123291004	3.20891e-09	BIRC5	baculoviral IAP repeat containing 5
ENSG00000149591	1056.22	7734.04	-2,76616944401092	7.38234e-10	TAGLN	transgelin
ENSG00000153234	2.23996	17.3184	-2,76642709959689	1.30266e-11	NR4A2	nuclear receptor subfamily 4, group A, member 2
ENSG00000213949	17.2899	94.2365	-2,76849027063143	1.57993e-24	ITGA1	integrin, alpha 1
ENSG00000185697	2.36601	10.8916	-2,77199089233444	1.55842e-11	MYBL1	v-myb myeloblastosis viral oncogene homolog (avian)-like 1
ENSG00000204257	1.22491	7.58621	-2,77660002217772	0.000148704	HLA-DMA	major histocompatibility complex, class II, DM alpha
ENSG00000256782	2.09527	14.0241	-2,77834849910012	8.84626e-14	AL118511.2
ENSG00000206956	129.264	878.741	-2,79080007996019	5.36102e-16	SNORD49A	small nucleolar RNA, C/D box 49A
ENSG00000138829	4.84558	31.9454	-2,79522656994200	1.01264e-23	FBN2	fibrillin 2
ENSG00000244703	0.346713	2.36121	-2,79697557273773	0.003542	CD46P1	CD46 molecule, complement regulatory protein pseudogene 1
ENSG00000117245	0.78186	10.8951	-2,80251247671557	1.13753e-07	KIF17	kinesin family member 17
ENSG00000215914	0.758181	5.45225	-2,80679481128442	0.000321399	MMP23A	matrix metallopeptidase 23A (pseudogene)
ENSG00000092853	0.312433	2.53684	-2,81225882243148	6.3999e-05	CLSPN	claspin
ENSG00000250927	0.421966	3.11028	-2,81280714218305	0.00330021	MESTP3	mesoderm specific transcript homolog (mouse) pseudogene 3
ENSG00000077157	1.48203	11.5874	-2,81699428838691	4.10548e-12	PPP1R12B	protein phosphatase 1, regulatory (inhibitor) subunit 12B
ENSG00000185630	2.96913	14.2924	-2,82347659867152	5.60236e-13	PBX1	pre-B-cell leukemia homeobox 1
ENSG00000116032	0.711089	5.14059	-2,82889126452984	2.42638e-08	GRIN3B	glutamate receptor, ionotropic, N-methyl-D-aspartate 3B
ENSG00000148842	4.2577	34.9412	-2,83113943338766	1.04346e-19	CNNM2	cyclin M2
ENSG00000204262	41.3066	294.437	-2,83369230698839	1.07037e-21	COL5A2	collagen, type V, alpha 2
ENSG00000024526	0.330787	2.64467	-2,83660451288899	0.00015217	DEPDC1	DEP domain containing 1
ENSG00000242086	2.87261	28.1603	-2,83837607491422	7.36266e-07	AC069513.3
ENSG00000109610	3.3581	24.766	-2,84359452065784	1.41621e-13	SOD3	superoxide dismutase 3, extracellular
ENSG00000157456	0.689709	5.00725	-2,84638016657765	4.59005e-05	CCNB2	cyclin B2
ENSG00000185664	0.603018	4.53341	-2,85630290826232	5.49739e-06	PMEL	premelanosome protein
ENSG00000169184	1.37007	3.03289	-2,8753479628173	1.61747e-05	MN1	meningioma (disrupted in balanced translocation) 1
ENSG00000178919	0.685677	5.31137	-2,88960017524464	3.52822e-09	FOXE1	forkhead box E1 (thyroid transcription factor 2)
ENSG00000150938	126.17	821.987	-2,88966683246899	7.77016e-20	CRIM1	cysteine rich transmembrane BMP regulator 1 (chordin-like)
ENSG00000113368	1.88192	19.9656	-2,89832973169476	7.80829e-09	LMNB1	lamin B1
ENSG00000168824	0.693193	2.93121	-2,91382874888693	8.69176e-05	AC110814.1	Neuron-specific protein family member 1
ENSG00000151892	3.56391	11.7597	-2,9164717519102	2.3952e-12	GFRA1	GDNF family receptor alpha 1
ENSG00000081923	1.48089	11.4781	-2,93334026609622	1.01163e-18	ATP8B1	ATPase, aminophospholipid transporter, class I, type 8B, member 1
ENSG00000254413	0.724894	6.86801	-2,94079052330369	4.86074e-09	CTA-384D8.32
ENSG00000168874	1.8922	15.2434	-2,94598868649650	3.60915e-13	ATOH8	atonal homolog 8 (Drosophila)
ENSG00000253051	2.15018	16.0854	-2,94759710706543	0.0101612	SNORA31.25	Small nucleolar RNA SNORA31
ENSG00000092421	2.75003	15.5227	-2,95068404138452	1.5993e-11	SEMA6A	sema domain, transmembrane domain (TM), and cytoplasmic domain, (semaphorin) 6A
ENSG00000235954	2.43039	18.19	-2,96019539413341	1.97537e-08	TTC28-AS1	TTC28 antisense RNA 1 (non-protein coding)
ENSG00000174371	0.571106	3.83829	-2,97268233846902	0.000365825	EXO1	exonuclease 1
ENSG00000185585	0.391878	3.81202	-2,97514224927793	1.25496e-09	OLFML2A	olfactomedin-like 2A
ENSG00000116016	67.0494	547.449	-2,98078322921827	2.58379e-24	EPAS1	endothelial PAS domain protein 1
ENSG00000166851	1.66686	11.9705	-2,98699716483288	2.88171e-11	PLK1	polo-like kinase 1
ENSG00000172733	0.552114	4.42045	-2,99570933490991	0.000144201	PURG	purine-rich element binding protein G
ENSG00000160886	0.756314	7.98417	-3,01346172515085	1.23248e-05	LY6K	lymphocyte antigen 6 complex, locus K
ENSG00000151572	2.10291	14.695	-3,01373079302713	1.09351e-16	ANO4	anoctamin 4
ENSG00000140285	1.32309	10.926	-3,0145866312481	1.03149e-18	FGF7	fibroblast growth factor 7
ENSG00000235510	6.94283	56.235	-3,03155021607919	5.45251e-07	BX842568.1
ENSG00000250320	0.802036	8.70477	-3,04037354496555	0.00111997	CTD-2269F5.1
ENSG00000153790	0.470438	3.2049	-3,05219073009373	0.000573799	C7orf31	chromosome 7 open reading frame 31
ENSG00000126218	1.896	15.2832	-3,05783119617459	8.66572e-11	F10	coagulation factor X
ENSG00000165490	0.714349	4.56783	-3,05921950557679	2.11622e-05	C11orf82	chromosome 11 open reading frame 82
ENSG00000183856	0.72036	4.01529	-3,06061269732618	3.68466e-10	IQGAP3	IQ motif containing GTPase activating protein 3
ENSG00000100526	0.775186	7.26455	-3,07475797858933	0.000533591	CDKN3	cyclin-dependent kinase inhibitor 3
ENSG00000173391	1.71349	10.5645	-3,08654232318946	6.2888e-07	OLR1	oxidized low density lipoprotein (lectin-like) receptor 1
ENSG00000162614	6.49394	73.6149	-3,08956293797803	3.92172e-25	NEXN	nexilin (F actin binding protein)
ENSG00000118507	0.716762	2.3809	-3,09091015971775	0.00021608	AKAP7	A kinase (PRKA) anchor protein 7
ENSG00000204176	0.653223	4.87622	-3,10239787220843	1.98531e-05	SYT15	synaptotagmin XV
ENSG00000180914	5.55851	38.756	-3,10243938761985	5.10517e-23	OXTR	oxytocin receptor
ENSG00000176697	4.88918	86.9792	-3,10374623792744	8.69532e-27	BDNF	brain-derived neurotrophic factor
ENSG00000132561	0.665211	8.42694	-3,11664717157627	6.21807e-08	MATN2	matrilin 2
ENSG00000169946	3.69761	22.1146	-3,11978126145366	6.35483e-20	ZFPM2	zinc finger protein, multitype 2
ENSG00000204305	0.749618	5.60319	-3,12698300311377	9.14531e-05	AGER	advanced glycosylation end product-specific receptor
ENSG00000155016	0.419326	2.91022	-3,13911558752384	6.84741e-07	CYP2U1	cytochrome P450, family 2, subfamily U, polypeptide 1
ENSG00000168078	0.683081	6.29283	-3,15040290993505	4.59824e-05	PBK	PDZ binding kinase
ENSG00000004799	0.382488	2.91989	-3,15596407195402	3.66865e-05	PDK4	pyruvate dehydrogenase kinase, isozyme 4
ENSG00000246985	0.559253	5.84695	-3,15842068130684	6.26643e-07	AC025260.2
ENSG00000129116	42.949	333.685	-3,16287055089848	9.58159e-27	PALLD	palladin, cytoskeletal associated protein
ENSG00000139209	0.252311	2.14927	-3,16353146516957	8.34183e-06	SLC38A4	solute carrier family 38, member 4
ENSG00000213626	83.3057	460.258	-3,17024763127347	3.09987e-28	LBH	limb bud and heart development homolog (mouse)
ENSG00000196159	0.627092	4.52163	-3,18468769221496	3.8335e-18	FAT4	FAT tumor suppressor homolog 4 (Drosophila)
ENSG00000141052	0.593391	5.79643	-3,18604196198462	3.51468e-14	MYOCD	myocardin
ENSG00000138449	1.84717	15.5379	-3,18751082109299	6.51831e-08	SLC40A1	solute carrier family 40 (iron-regulated transporter), member 1
ENSG00000243649	1.54171	14.3881	-3,19725455555854	2.64066e-07	CFB	complement factor B
ENSG00000225614	1.75825	16.2944	-3,20202976622143	3.02242e-28	ZNF469	zinc finger protein 469
ENSG00000169760	1.47017	7.82122	-3,20499699322199	3.00394e-06	NLGN1	neuroligin 1
ENSG00000121361	0.529661	5.66907	-3,2177837887728	1.65226e-05	KCNJ8	potassium inwardly-rectifying channel, subfamily J, member 8
ENSG00000256767	3.51887	33.4334	-3,21924153608859	1.77726e-08	AC018728.1
ENSG00000167191	1.7746	15.5639	-3,22564925319687	1.52877e-14	GPRC5B	G protein-coupled receptor, family C, group 5, member B
ENSG00000111859	9.85558	23.0186	-3,24061475902631	1.11523e-22	NEDD9	neural precursor cell expressed, developmentally down-regulated 9
ENSG00000171241	0.483757	4.66303	-3,24392222627693	1.51542e-09	SHCBP1	SHC SH2-domain binding protein 1
ENSG00000120693	1.20993	9.57504	-3,24810098485791	1.74839e-15	SMAD9	SMAD family member 9
ENSG00000018625	0.258057	2.67228	-3,25773773700138	4.38466e-05	ATP1A2	ATPase, Na+/K+ transporting, alpha 2 polypeptide
ENSG00000134871	124.931	1149.28	-3,2825117840348	1.08024e-17	COL4A2	collagen, type IV, alpha 2
ENSG00000144354	0.209687	2.34206	-3,28327668097655	7.7074e-05	CDCA7	cell division cycle associated 7
ENSG00000122176	2.36308	27.1379	-3,29710942570019	2.00858e-13	FMOD	fibromodulin
ENSG00000162878	5.41298	62.068	-3,30597965834474	2.09587e-20	PKDCC	protein kinase domain containing, cytoplasmic homolog (mouse)
ENSG00000020181	16.9237	136.801	-3,32082370425050	1.60097e-29	GPR124	G protein-coupled receptor 124
ENSG00000237807	0.21912	2.2006	-3,32263228322206	0.000110106	RP11-400K9.4
ENSG00000130176	17.8553	183.159	-3,32784225441832	1.61759e-29	CNN1	calponin 1, basic, smooth muscle
ENSG00000137801	434.897	4330.31	-3,33598574614905	3.47196e-06	THBS1	thrombospondin 1
ENSG00000189184	5.80272	61.5054	-3,33712308812622	1.04781e-30	PCDH18	protocadherin 18
ENSG00000111913	0.268267	2.38588	-3,33916060405807	7.94803e-06	FAM65B	family with sequence similarity 65, member B
ENSG00000107562	1.71566	11.7265	-3,34074919012275	2.83623e-09	CXCL12	chemokine (C-X-C motif) ligand 12
ENSG00000071242	3.04577	28.4034	-3,34429462285182	1.2703e-24	RPS6KA2	ribosomal protein S6 kinase, 90kDa, polypeptide 2
ENSG00000136014	0.342035	4.29531	-3,34710828872313	2.39831e-08	USP44	ubiquitin specific peptidase 44
ENSG00000173706	8.42396	80.5891	-3,35028543511041	4.11831e-30	HEG1	HEG homolog 1 (zebrafish)
ENSG00000072163	10.1818	91.5228	-3,36338997161028	1.47829e-28	LIMS2	LIM and senescent cell antigen-like domains 2
ENSG00000136542	8.78397	66.852	-3,37214500506389	4.59911e-31	GALNT5	UDP-N-acetyl-alpha-D-galactosamine:polypeptide N-acetylgalactosaminyltransferase 5 (GalNAc-T5)
ENSG00000120594	0.475851	5.62492	-3,37478732911089	1.01543e-09	PLXDC2	plexin domain containing 2
ENSG00000198901	1.07999	12.0869	-3,38370039155191	2.2002e-16	PRC1	protein regulator of cytokinesis 1
ENSG00000223774	3.23052	39.1284	-3,41149863922786	2.04368e-11	RP11-307B6.3
ENSG00000105894	1.30868	14.4241	-3,41975827132007	3.58063e-13	PTN	pleiotrophin
ENSG00000101447	0.450881	4.84266	-3,42454939120535	1.68083e-08	FAM83D	family with sequence similarity 83, member D
ENSG00000187498	35.4353	362.611	-3,43979240666342	3.0304e-24	COL4A1	collagen, type IV, alpha 1
ENSG00000164161	1.01167	7.4929	-3,44416677709318	5.45106e-07	HHIP	hedgehog interacting protein
ENSG00000137812	0.197234	6.60859	-3,44747465874667	2.92721e-06	CASC5	cancer susceptibility candidate 5
ENSG00000166482	2.12849	24.1954	-3,45397958667868	4.66449e-18	MFAP4	microfibrillar-associated protein 4
ENSG00000092470	0.239817	3.70586	-3,48951825143365	1.94137e-06	WDR76	WD repeat domain 76
ENSG00000011465	23.4579	215.523	-3,49856579290842	3.00141e-32	DCN	decorin
ENSG00000122707	3.68008	33.0243	-3,50353006294139	6.3172e-30	RECK	reversion-inducing-cysteine-rich protein with kazal motifs
ENSG00000131747	0.565492	6.51737	-3,50405163244776	1.83328e-17	TOP2A	topoisomerase (DNA) II alpha 170kDa
ENSG00000136160	1.51769	14.0046	-3,50438943376642	1.64212e-17	EDNRB	endothelin receptor type B
ENSG00000178343	0.198862	2.43734	-3,51812546043305	4.81219e-05	SHISA3	shisa homolog 3 (Xenopus laevis)
ENSG00000230749	0.703791	9.91702	-3,5259678621754	2.90506e-06	AC092669.4
ENSG00000186185	0.225029	2.58461	-3,52710692249949	1.3432e-06	KIF18B	kinesin family member 18B
ENSG00000138180	0.484931	4.56207	-3,53348483091151	3.31152e-08	CEP55	centrosomal protein 55kDa
ENSG00000137804	0.305319	4.06937	-3,55856172771851	4.15639e-07	NUSAP1	nucleolar and spindle associated protein 1
ENSG00000183087	66.5387	811.529	-3,56120880784464	6.37155e-21	GAS6	growth arrest-specific 6
ENSG00000142731	0.52015	4.3494	-3,5654028327732	8.81767e-06	PLK4	polo-like kinase 4
ENSG00000111664	0.972528	9.44951	-3,57433575654281	2.12595e-08	GNB3	guanine nucleotide binding protein (G protein), beta polypeptide 3
ENSG00000207817	24.0601	278.929	-3,58030360749319	5.43333e-13	MIR614	microRNA 614
ENSG00000011426	4.24296	56.7655	-3,59599869052239	4.44073e-24	ANLN	anillin, actin binding protein
ENSG00000092969	0.948639	15.9802	-3,59616913903238	4.70902e-15	TGFB2	transforming growth factor, beta 2
ENSG00000103196	0.750293	9.43595	-3,59998997253811	2.41265e-19	CRISPLD2	cysteine-rich secretory protein LCCL domain containing 2
ENSG00000126803	2.29712	29.6452	-3,61183985903839	1.91069e-24	HSPA2	heat shock 70kDa protein 2
ENSG00000134121	3.44348	14.7146	-3,61565879923372	3.17635e-15	CHL1	cell adhesion molecule with homology to L1CAM (close homolog of L1)
ENSG00000137463	0.358606	4.8148	-3,62902031419176	2.72063e-06	C4orf49	chromosome 4 open reading frame 49
ENSG00000103175	3.21709	41.501	-3,63947810129087	9.26707e-24	WFDC1	WAP four-disulfide core domain 1
ENSG00000139132	1.63738	7.39204	-3,66134814609413	1.03085e-12	FGD4	FYVE, RhoGEF and PH domain containing 4
ENSG00000136153	15.1876	241.443	-3,66765765209741	1.51392e-33	LMO7	LIM domain 7
ENSG00000254340	0.497701	6.21648	-3,67185108508426	0.000103816	RP11-10A14.3
ENSG00000143127	0.232726	2.85653	-3,67968044935192	2.77404e-08	ITGA10	integrin, alpha 10
ENSG00000228315	1.25384	7.91955	-3,70254595781415	3.70555e-10	AP000347.2	glucuronidase, beta/immunoglobulin lambda-like polypeptide 1 pseudogene (LOC91316), non-coding RNA
ENSG00000128045	0.237761	2.51458	-3,70491657465486	2.08724e-05	RASL11B	RAS-like, family 11, member B
ENSG00000189056	0.38337	5.32472	-3,73117653633725	8.66833e-24	RELN	reelin
ENSG00000175899	17.2959	185.662	-3,75338790506010	1.31577e-34	A2M	alpha-2-macroglobulin
ENSG00000074527	2.24186	36.8086	-3,78531297152144	1.36334e-29	NTN4	netrin 4
ENSG00000138735	17.5209	201.223	-3,83152083367315	2.57489e-35	PDE5A	phosphodiesterase 5A, cGMP-specific
ENSG00000169255	0.844068	8.79901	-3,83311881342677	3.63321e-11	B3GALNT1	beta-1,3-N-acetylgalactosaminyltransferase 1 (globoside blood group)
ENSG00000237499	0.241349	4.09596	-3,91953820893512	2.11097e-05	RP11-356I2.4
ENSG00000171951	0.905397	7.51733	-3,92352389033905	8.52155e-11	SCG2	secretogranin II
ENSG00000183508	0.718891	11.1801	-3,92473016118748	8.15477e-26	FAM46C	family with sequence similarity 46, member C
ENSG00000244731	0.992563	4.48754	-3,9813987390811	3.97935e-09	C4A	complement component 4A (Rodgers blood group)
ENSG00000255701	0.234287	3.92136	-3,98582362485057	0.000221531	AC090953.1
ENSG00000174640	0.389029	6.81623	-3,98765761390388	1.05947e-08	SLCO2A1	solute carrier organic anion transporter family, member 2A1
ENSG00000101265	0.290464	4.93332	-4,01931122776237	3.11056e-17	RASSF2	Ras association (RalGDS/AF-6) domain family member 2
ENSG00000131386	0.848652	12.3015	-4,02585617821143	8.73688e-17	GALNTL2	UDP-N-acetyl-alpha-D-galactosamine:polypeptide N-acetylgalactosaminyltransferase-like 2
ENSG00000168542	23.2213	341.236	-4,02614059753685	2.95427e-34	COL3A1	collagen, type III, alpha 1
ENSG00000229619	0.235181	4.1181	-4,06169244624763	9.07338e-06	AC106722.1	HCG1806964, isoform CRA_acDNA FLJ55426cDNA, FLJ79414
ENSG00000164176	4.5633	76.0809	-4,08499425624259	1.16564e-36	EDIL3	EGF-like repeats and discoidin I-like domains 3
ENSG00000086696	0.252774	4.41094	-4,09147437889634	4.46476e-07	HSD17B2	hydroxysteroid (17-beta) dehydrogenase 2
ENSG00000149596	0.723784	10.7571	-4,14024654268371	8.73862e-24	JPH2	junctophilin 2
ENSG00000171408	0.413653	2.83503	-4,20668686913388	2.08992e-11	PDE7B	phosphodiesterase 7B
ENSG00000128917	3.14797	59.9998	-4,21586138893576	3.65619e-38	DLL4	delta-like 4 (Drosophila)
ENSG00000110693	0.836601	8.94564	-4,21923516167206	1.20435e-17	SOX6	SRY (sex determining region Y)-box 6
ENSG00000101057	0.358778	6.85335	-4,21942810262829	2.40393e-14	MYBL2	v-myb myeloblastosis viral oncogene homolog (avian)-like 2
ENSG00000240979	0.504194	8.22476	-4,23005566001744	0.000133484	RP11-79D8.2
ENSG00000173114	1.22585	20.7356	-4,28308837401035	2.60792e-29	LRRN3	leucine rich repeat neuronal 3
ENSG00000172346	1.1509	19.0271	-4,31900352272266	3.37931e-25	CSDC2	cold shock domain containing C2, RNA binding
ENSG00000256261	12.0157	255.245	-4,32271670461092	6.20069e-39	AC104698.1
ENSG00000146122	0.330837	9.43131	-4,34390097665596	1.31085e-19	DAAM2	dishevelled associated activator of morphogenesis 2
ENSG00000145386	0.192613	3.92201	-4,35450974870947	8.18437e-11	CCNA2	cyclin A2
ENSG00000138771	5.60546	96.1233	-4,35829271307457	1.92327e-40	SHROOM3	shroom family member 3
ENSG00000220884	0.152276	3.28793	-4,37348946872766	1.11861e-05	MESTP1	mesoderm specific transcript homolog (mouse) pseudogene 1
ENSG00000170312	0.232036	8.65616	-4,37447698543461	2.24524e-08	CDK1	cyclin-dependent kinase 1
ENSG00000115380	11.6518	244.951	-4,38327908074776	4.0332e-41	EFEMP1	EGF containing fibulin-like extracellular matrix protein 1
ENSG00000117586	1.13735	17.2684	-4,39608163837933	3.63037e-25	TNFSF4	tumor necrosis factor (ligand) superfamily, member 4
ENSG00000148773	0.165783	10.3363	-4,41574361262598	5.78099e-22	MKI67	antigen identified by monoclonal antibody Ki-67
ENSG00000162591	0.514915	6.02985	-4,43376005914786	5.35514e-15	MEGF6	multiple EGF-like-domains 6
ENSG00000134243	5.27253	69.9754	-4,46868189032344	2.94906e-42	SORT1	sortilin 1
ENSG00000113231	0.127331	4.27794	-4,48096176281729	1.35535e-11	PDE8B	phosphodiesterase 8B
ENSG00000165507	0.418901	8.73362	-4,52283418201607	3.77056e-14	C10orf10	chromosome 10 open reading frame 10
ENSG00000061337	0.325701	10.6296	-4,56374271065618	4.71363e-17	LZTS1	leucine zipper, putative tumor suppressor 1
ENSG00000229988	0.270947	7.85955	-4,70322531515211	3.23157e-06	HBBP1	hemoglobin, beta pseudogene 1
ENSG00000155926	0.117796	7.23202	-4,81220855276138	4.30894e-07	SLA	Src-like-adaptor
ENSG00000103888	6.51766	179.806	-5,08291852027411	9.59135e-46	KIAA1199	KIAA1199
ENSG00000131620	0.220722	10.0151	-5,10974089273429	1.12747e-22	ANO1	anoctamin 1, calcium activated chloride channel
ENSG00000240583	0.341211	8.35918	-5,13836282268557	2.77234e-16	AQP1	aquaporin 1 (Colton blood group)
ENSG00000072952	1.109	39.8408	-5,16176198689704	6.68647e-45	MRVI1	murine retrovirus integration site 1 homolog
ENSG00000025423	0.0663706	2.59533	-5,18803447254584	1.67178e-07	HSD17B6	hydroxysteroid (17-beta) dehydrogenase 6 homolog (mouse)
ENSG00000174348	0.351933	10.946	-5,23500204671491	7.00724e-21	PODN	podocan
ENSG00000104415	0.789846	25.4601	-5,26164018152481	1.26499e-24	WISP1	WNT1 inducible signaling pathway protein 1
ENSG00000145244	0.124363	7.71238	-5,59716121303329	4.89443e-18	CORIN	corin, serine peptidase
ENSG00000204291	0.701514	31.0282	-5,63602044526092	4.4196e-42	COL15A1	collagen, type XV, alpha 1
ENSG00000169271	0.0777277	3.6131	-5,64021597420651	1.10838e-06	HSPB3	heat shock 27kDa protein 3
ENSG00000124212	0.174132	9.11014	-5,66245400543353	5.53423e-18	PTGIS	prostaglandin I2 (prostacyclin) synthase
ENSG00000181072	1.12436	57.6448	-5,89544559722986	1.24809e-52	CHRM2	cholinergic receptor, muscarinic 2
ENSG00000049540	8.23135	328.364	-6,19005782425665	4.07098e-53	ELN	elastin
ENSG00000213931	0.150461	13.5185	-6,25637041667135	9.2472e-16	HBE1	hemoglobin, epsilon 1
ENSG00000254908	0.559613	55.4325	-6,47719002476212	1.08722e-43	C1QTNF5	C1q and tumor necrosis factor related protein 5
ENSG00000163431	0.505417	42.3431	-6,51052463072034	1.96354e-56	LMOD1	leiomodin 1 (smooth muscle)
ENSG00000117600	0.0399741	7.18011	-6,98123459315378	3.58684e-29	RP4-788L13.1	Lipid phosphate phosphatase-related protein type 4
ENSG00000127951	0.0789858	11.148	-7,12766781447289	1.1097e-41	FGL2	fibrinogen-like 2
ENSG00000201778	0.341397	93.4878	-7,91734995323416	3.19477e-15	Y_RNA.335	Y RNA
