# Supplementary material for: Sumoylation at chromatin governs coordinated repression of a transcriptional program essential for cell growth and proliferation
Source: HighWire-hosted journal article supplement (doi:10.1101/gr.154872.113), 2013-07-26
Supplement: Supplemental_Table8.xlsx [file Supplemental_Table8.xlsx]

## Sheet: Feuil1
Target	Sequence or Cat. No	Ref.
HIST1 H2AC	PPH02209F	RT² qPCR Primer Assays Qiagen
HIST1 H2BC	PPH13810B
HIST1 H3D	PPH14833A
HIST1 H4H	PPH19904A
HIST1 H2BG	PPH13810B
HIST1 H2BE	PPH58008A
GAPDH	QT00079247	QuantiTect Primer Assay Qiagen
EGR1	QT00218505
EGR2	QT00000924
FOS	QT00007070
MYC	QT00035406
CCND1	QT00495285
HRAS	QT00008799
TBP	QT00000721
RPL26	QT01007748
RPS14	QT00062223
GTF2B	5´-CAGTTGTAATCAAATCCACAC-3´	Grandori et al.
	5´-GCAGACAGAATCAATCTAC-3´
pre-rRNA	5´-CCTGCTGTTCTCTCGCGCGTCCGAG-3´
	5´-AACGCCTGACACGCACGGCACGGAG-3´
GTF3C1	5′-TCCAGCGAGACCTTCACACC-3′	Winter et al.
	5′-GGATTGAGTGTTGCTGGGCT-3′
5S	5′-GGCCATACCACCCTGAACGC-3′
	5′-CAGCACCCGGTATTCCCAGG-3′
7SL	5′-GTGTCCGCACTAAGTTCGGCATCAATATGG-3′
	5′-TATTCACAGGCGCGATCCCACTACTGATC-3′
pre-tRNA-tyr	5′-CCTTCGATAGCTCAGCTGGTAGAGCGGAGG-3′
	5′-CGGAATTGAACCAGCGACCTAAGGATGTCC-3′
UBEI (UBC9)	5'-GGACCTGTGGCTGGAGAGGGAC-3′
	5'-TTCCTCTCCTGGGCGAGTCTGC-3′
SUMO1	5'-TCTGCTTACCCGAGGCCGCT-3′
	5'-TCCCCCAAGTCCTCAGTTGAAGGT-3′
PIAS4 (PIASy)	5'-TACTGCTCCGTCCCGGGCTAC-3′
	5'-GAGGTTGATGGGGCGGCACG-3′
